# Supplementary material for: A database of calculated solution parameters for the AlphaFold predicted protein structures
Source: Sci Rep. 2022 May 5;12:7349. doi: 10.1038/s41598-022-10607-z (PMC9072687; doi:10.1038/s41598-022-10607-z)
Supplement: Supplementary file 4 — Supplementary Information 2. [file 41598_2022_10607_MOESM4_ESM.xlsx]

## Sheet: US-SOMO-AF subset
UniProt accession	AlphaFold Model name	Title	Source	Alphafold date	Hydrodynamic calculations date	Signal peptide removed	Molecular mass [Da]	Partial specific volume [cm^3/g]	Translational diffusion coefficient D [F]	Translational diffusion coefficient D s.d	Sedimentation coefficient s [S]	Sedimentation coefficient s.d	Stokes radius [nm]	Stokes radius s.d	Intrinsic viscosity [cm^3/g]	Intrisic viscosity s.d	Radius of gyration [A] (from PDB atomic structure)	Maximum extension X [nm]	Maximum extension Y [nm]	Maximum extension Z [nm]	Helix %	Sheet %	Mean % confidence	Rg/Rs
Q2R0I2-F1	AF-Q2R0I2-F1-model_v1	ALPHAFOLD V2.0 PREDICTION FOR OS11G0644600 PROTEIN (Q2R0I2)	MOL_ID: 1; ORGANISM_SCIENTIFIC: ORYZA SATIVA SUBSP. JAPONICA; ORGANISM_TAXID: 39947	01-JUL-21	12-OCT-21	n/a	58320.9	0.728	2.53	0.026	1.66	0.0027	8.46	0.014	155	2.55	187	59.47	8.45	5.12	81.3	0	78.22	2.2104
O70559-F1	AF-O70559-F1-model_v1	ALPHAFOLD V2.0 PREDICTION FOR SMALL PROLINE-RICH PROTEIN 2H (O70559)	MOL_ID: 1; ORGANISM_SCIENTIFIC: MUS MUSCULUS; ORGANISM_TAXID: 10090	01-JUL-21	12-OCT-21	n/a	11724.9	0.722	5.04	0.051	0.677	0.0011	4.25	0.0071	95.4	1.59	92.2	31.21	3.04	2.91	5.6	0	80.12	2.16941
D3ZVI7-F1	AF-D3ZVI7-F1-model_v1	ALPHAFOLD V2.0 PREDICTION FOR SPINDLE ASSEMBLY ABNORMAL PROTEIN 6 HOMOLOG (D3ZVI7)	MOL_ID: 1; ORGANISM_SCIENTIFIC: RATTUS NORVEGICUS; ORGANISM_TAXID: 10116	01-JUL-21	12-OCT-21	n/a	64958.7	0.741	2.81	0.028	1.95	0.003	7.64	0.012	90.3	1.47	165	50.46	7.35	6.36	62.6	10.8	78.75	2.15969
Q8TBF8-F1	AF-Q8TBF8-F1-model_v1	ALPHAFOLD V2.0 PREDICTION FOR PROTEIN FAM81A (Q8TBF8)	MOL_ID: 1; ORGANISM_SCIENTIFIC: HOMO SAPIENS; ORGANISM_TAXID: 9606	01-JUL-21	12-OCT-21	n/a	42405.7	0.736	3.05	0.031	1.41	0.0024	7.04	0.012	123	2.04	152	52.43	5.33	3.65	89.1	0	82.37	2.15909
A0A0P0W6I4-F1	AF-A0A0P0W6I4-F1-model_v1	ALPHAFOLD V2.0 PREDICTION FOR OS04G0155000 PROTEIN (A0A0P0W6I4)	MOL_ID: 1; ORGANISM_SCIENTIFIC: ORYZA SATIVA SUBSP. JAPONICA; ORGANISM_TAXID: 39947	01-JUL-21	12-OCT-21	n/a	37731	0.734	3.34	0.034	1.38	0.0023	6.42	0.011	103	1.71	136	46.54	7.7	4.71	96	0	86.78	2.11838
Q5TEZ5-F1	AF-Q5TEZ5-F1-model_v1	ALPHAFOLD V2.0 PREDICTION FOR UNCHARACTERIZED PROTEIN C6ORF163 (Q5TEZ5)	MOL_ID: 1; ORGANISM_SCIENTIFIC: HOMO SAPIENS; ORGANISM_TAXID: 9606	01-JUL-21	12-OCT-21	n/a	38557	0.737	3.52	0.036	1.47	0.0023	6.1	0.0097	80.4	1.32	129	41.17	6.47	4.24	82.6	0	84.3	2.11475
Q7XSN5-F1	AF-Q7XSN5-F1-model_v1	ALPHAFOLD V2.0 PREDICTION FOR OS04G0161400 PROTEIN (Q7XSN5)	MOL_ID: 1; ORGANISM_SCIENTIFIC: ORYZA SATIVA SUBSP. JAPONICA; ORGANISM_TAXID: 39947	01-JUL-21	12-OCT-21	n/a	37218.3	0.737	3.36	0.034	1.35	0.0023	6.39	0.011	103	1.72	135	47.3	5.02	3.55	99.4	0	86.93	2.11268
Q8N998-F1	AF-Q8N998-F1-model_v1	ALPHAFOLD V2.0 PREDICTION FOR COILED-COIL DOMAIN-CONTAINING PROTEIN 89 (Q8N998)	MOL_ID: 1; ORGANISM_SCIENTIFIC: HOMO SAPIENS; ORGANISM_TAXID: 9606	01-JUL-21	12-OCT-21	n/a	43802.9	0.732	3.23	0.033	1.57	0.0025	6.62	0.011	92.1	1.52	138	46.67	5.43	5.23	92.8	0	83.06	2.08459
P07951-F1	AF-P07951-F1-model_v1	ALPHAFOLD V2.0 PREDICTION FOR TROPOMYOSIN BETA CHAIN (P07951)	MOL_ID: 1; ORGANISM_SCIENTIFIC: HOMO SAPIENS; ORGANISM_TAXID: 9606	01-JUL-21	12-OCT-21	n/a	32827.6	0.732	3.66	0.037	1.33	0.0022	5.85	0.0096	86	1.42	121	42.67	3.47	3.23	99.3	0	91.42	2.06838
Q9C7V7-F1	AF-Q9C7V7-F1-model_v1	ALPHAFOLD V2.0 PREDICTION FOR AT1G64330 (Q9C7V7)	MOL_ID: 1; ORGANISM_SCIENTIFIC: ARABIDOPSIS THALIANA; ORGANISM_TAXID: 3702	01-JUL-21	12-OCT-21	n/a	64474.3	0.733	2.5	0.025	1.77	0.0029	8.58	0.014	138	2.28	175	59.96	7.84	7.22	88.6	0	80.22	2.03963
A1Z7Z4-F1	AF-A1Z7Z4-F1-model_v1	ALPHAFOLD V2.0 PREDICTION FOR UNCHARACTERIZED PROTEIN, ISOFORM B (A1Z7Z4)	MOL_ID: 1; ORGANISM_SCIENTIFIC: DROSOPHILA MELANOGASTER; ORGANISM_TAXID: 7227	01-JUL-21	12-OCT-21	n/a	24227.7	0.725	4.25	0.043	1.17	0.0019	5.04	0.0083	74	1.23	102	36.46	3.77	2.44	94.4	0	73.65	2.02381
A0A0G2KS88-F1	AF-A0A0G2KS88-F1-model_v1	ALPHAFOLD V2.0 PREDICTION FOR UNCHARACTERIZED PROTEIN (A0A0G2KS88)	MOL_ID: 1; ORGANISM_SCIENTIFIC: DANIO RERIO; ORGANISM_TAXID: 7955	01-JUL-21	12-OCT-21	n/a	33725.4	0.735	3.83	0.039	1.41	0.0022	5.59	0.0087	68.4	1.11	113	37	4.91	4.1	85.7	0	86.38	2.02147
B4F9B3-F1	AF-B4F9B3-F1-model_v1	ALPHAFOLD V2.0 PREDICTION FOR PROTEIN AT-4/1 (B4F9B3)	MOL_ID: 1; ORGANISM_SCIENTIFIC: ZEA MAYS; ORGANISM_TAXID: 4577	01-JUL-21	12-OCT-21	n/a	29405.3	0.729	4.04	0.041	1.33	0.0021	5.3	0.0085	69.3	1.14	106	37.42	4.47	3.11	96.8	0	93	2
A0A0G2JX91-F1	AF-A0A0G2JX91-F1-model_v1	ALPHAFOLD V2.0 PREDICTION FOR MYOSIN_TAIL_1 DOMAIN-CONTAINING PROTEIN (A0A0G2JX91)	MOL_ID: 1; ORGANISM_SCIENTIFIC: RATTUS NORVEGICUS; ORGANISM_TAXID: 10116	01-JUL-21	12-OCT-21	n/a	28403.5	0.73	4.04	0.041	1.28	0.0021	5.31	0.0086	71.4	1.18	106	37.43	5.45	3.24	96.7	0	90.79	1.99623
P67936-F1	AF-P67936-F1-model_v1	ALPHAFOLD V2.0 PREDICTION FOR TROPOMYOSIN ALPHA-4 CHAIN (P67936)	MOL_ID: 1; ORGANISM_SCIENTIFIC: HOMO SAPIENS; ORGANISM_TAXID: 9606	01-JUL-21	12-OCT-21	n/a	28501.4	0.731	4.08	0.041	1.29	0.0021	5.25	0.0085	68.4	1.12	104	37.03	3.34	3.2	98.8	0	93.14	1.98095
Q4CSZ3-F1	AF-Q4CSZ3-F1-model_v1	ALPHAFOLD V2.0 PREDICTION FOR UNCHARACTERIZED PROTEIN (Q4CSZ3)	MOL_ID: 1; ORGANISM_SCIENTIFIC: TRYPANOSOMA CRUZI (STRAIN CL BRENER); ORGANISM_TAXID: 353153	01-JUL-21	12-OCT-21	n/a	28665.2	0.73	4.1	0.042	1.31	0.0021	5.23	0.0084	67.6	1.11	103	36.39	3.93	3.42	97.5	0	91.12	1.96941
Q6PFT0-F1	AF-Q6PFT0-F1-model_v1	ALPHAFOLD V2.0 PREDICTION FOR FLOTILLIN (Q6PFT0)	MOL_ID: 1; ORGANISM_SCIENTIFIC: DANIO RERIO; ORGANISM_TAXID: 7955	01-JUL-21	12-OCT-21	n/a	46965.3	0.745	3.72	0.038	1.84	0.0027	5.75	0.0083	47.8	0.77	113	33.1	9.81	5.13	66	10.8	81.28	1.96522
Q95XJ5-F1	AF-Q95XJ5-F1-model_v1	ALPHAFOLD V2.0 PREDICTION FOR UNCHARACTERIZED PROTEIN (Q95XJ5)	MOL_ID: 1; ORGANISM_SCIENTIFIC: CAENORHABDITIS ELEGANS; ORGANISM_TAXID: 6239	01-JUL-21	12-OCT-21	n/a	50114.9	0.731	3.09	0.031	1.72	0.0026	6.94	0.01	79.4	1.28	134	42.27	7.19	5.24	73.8	0	74.49	1.93084
A3KQH2-F1	AF-A3KQH2-F1-model_v1	ALPHAFOLD V2.0 PREDICTION FOR DYNEIN REGULATORY COMPLEX PROTEIN 9 (A3KQH2)	MOL_ID: 1; ORGANISM_SCIENTIFIC: DANIO RERIO; ORGANISM_TAXID: 7955	01-JUL-21	12-OCT-21	n/a	40682.5	0.736	3.65	0.037	1.62	0.0024	5.86	0.0088	60.2	0.97	112	34.29	7.76	5.24	87.8	0	82.11	1.91126
P22528-F1	AF-P22528-F1-model_v1	ALPHAFOLD V2.0 PREDICTION FOR CORNIFIN-B (P22528)	MOL_ID: 1; ORGANISM_SCIENTIFIC: HOMO SAPIENS; ORGANISM_TAXID: 9606	01-JUL-21	12-OCT-21	n/a	9894.6	0.732	5.96	0.06	0.652	0.001	3.59	0.0057	59.5	0.98	67.8	24.53	3.83	1.99	2.3	0	69.91	1.88858
P0C7W6-F1	AF-P0C7W6-F1-model_v1	ALPHAFOLD V2.0 PREDICTION FOR COILED-COIL DOMAIN-CONTAINING PROTEIN 172 (P0C7W6)	MOL_ID: 1; ORGANISM_SCIENTIFIC: HOMO SAPIENS; ORGANISM_TAXID: 9606	01-JUL-21	12-OCT-21	n/a	31025	0.739	3.96	0.04	1.32	0.0021	5.41	0.0084	63.6	1.04	102	36.03	8.03	2.95	93	0	88.83	1.8854
Q4DYJ1-F1	AF-Q4DYJ1-F1-model_v1	ALPHAFOLD V2.0 PREDICTION FOR UNCHARACTERIZED PROTEIN (Q4DYJ1)	MOL_ID: 1; ORGANISM_SCIENTIFIC: TRYPANOSOMA CRUZI (STRAIN CL BRENER); ORGANISM_TAXID: 353153	01-JUL-21	12-OCT-21	n/a	33221.8	0.768	4.1	0.041	1.3	0.002	5.23	0.0079	52.6	0.86	98.2	32.48	6.09	3.85	83.7	0	66.87	1.87763
O96231-F1	AF-O96231-F1-model_v1	ALPHAFOLD V2.0 PREDICTION FOR UNCHARACTERIZED PROTEIN (O96231)	MOL_ID: 1; ORGANISM_SCIENTIFIC: PLASMODIUM FALCIPARUM (ISOLATE 3D7); ORGANISM_TAXID: 36329	01-JUL-21	12-OCT-21	n/a	29529	0.739	4.17	0.042	1.33	0.002	5.13	0.0079	55.6	0.91	95.9	32.76	5.49	4.85	83.5	0	84.96	1.8694
A0A0R0E5I8-F1	AF-A0A0R0E5I8-F1-model_v1	ALPHAFOLD V2.0 PREDICTION FOR UNCHARACTERIZED PROTEIN (A0A0R0E5I8)	MOL_ID: 1; ORGANISM_SCIENTIFIC: GLYCINE MAX; ORGANISM_TAXID: 3847	01-JUL-21	12-OCT-21	n/a	25345.1	0.735	4.45	0.045	1.23	0.0019	4.82	0.0075	55.7	0.91	89.9	32.21	6.01	3.06	96.3	0	90.11	1.86515
E9PZM0-F1	AF-E9PZM0-F1-model_v1	ALPHAFOLD V2.0 PREDICTION FOR PREDICTED GENE 3526 (E9PZM0)	MOL_ID: 1; ORGANISM_SCIENTIFIC: MUS MUSCULUS; ORGANISM_TAXID: 10090	01-JUL-21	12-OCT-21	n/a	22301.5	0.735	4.9	0.05	1.19	0.0019	4.37	0.0068	45.9	0.75	81.3	28.85	3.25	3.1	99	0	86.99	1.86041
Q14254-F1	AF-Q14254-F1-model_v1	ALPHAFOLD V2.0 PREDICTION FOR FLOTILLIN-2 (Q14254)	MOL_ID: 1; ORGANISM_SCIENTIFIC: HOMO SAPIENS; ORGANISM_TAXID: 9606	01-JUL-21	12-OCT-21	n/a	47060.1	0.745	3.74	0.038	1.85	0.0026	5.72	0.008	42.7	0.69	106	30.4	12.19	5.23	67.5	10.8	81.59	1.85315
B8JK76-F1	AF-B8JK76-F1-model_v1	ALPHAFOLD V2.0 PREDICTION FOR SEROLOGICALLY DEFINED COLON CANCER ANTIGEN 8 HOMOLOG (B8JK76)	MOL_ID: 1; ORGANISM_SCIENTIFIC: DANIO RERIO; ORGANISM_TAXID: 7955	01-JUL-21	12-OCT-21	n/a	80440.3	0.725	2.31	0.023	2.1	0.0033	9.29	0.015	125	2.05	172	61.39	13.55	10.15	84.7	0	78.44	1.85145
Q494R4-F1	AF-Q494R4-F1-model_v1	ALPHAFOLD V2.0 PREDICTION FOR COILED-COIL DOMAIN-CONTAINING PROTEIN 153 (Q494R4)	MOL_ID: 1; ORGANISM_SCIENTIFIC: HOMO SAPIENS; ORGANISM_TAXID: 9606	01-JUL-21	12-OCT-21	n/a	23869.6	0.73	4.5	0.046	1.2	0.0019	4.76	0.0074	57.1	0.94	88	30.59	6.48	3.22	86.6	0	88.29	1.84874
X1WHC5-F1	AF-X1WHC5-F1-model_v1	ALPHAFOLD V2.0 PREDICTION FOR SWITCHING B CELL COMPLEX SUBUNIT SWAP70A (X1WHC5)	MOL_ID: 1; ORGANISM_SCIENTIFIC: DANIO RERIO; ORGANISM_TAXID: 7955	01-JUL-21	12-OCT-21	n/a	69261.8	0.736	3.32	0.034	2.5	0.0036	6.46	0.0094	45.8	0.73	119	37.55	8.62	6.52	65.2	5.8	82.6	1.84211
A0A1D6JQN1-F1	AF-A0A1D6JQN1-F1-model_v1	ALPHAFOLD V2.0 PREDICTION FOR UNCHARACTERIZED PROTEIN (A0A1D6JQN1)	MOL_ID: 1; ORGANISM_SCIENTIFIC: ZEA MAYS; ORGANISM_TAXID: 4577	01-JUL-21	12-OCT-21	1-20	22507.2	0.744	4.82	0.049	1.15	0.0018	4.44	0.0069	47.7	0.78	81.5	29.46	3.48	3.33	93.2	0	90.72	1.83559
F1RDR9-F1	AF-F1RDR9-F1-model_v1	ALPHAFOLD V2.0 PREDICTION FOR MICROTUBULE ASSOCIATED SCAFFOLD PROTEIN 2 (F1RDR9)	MOL_ID: 1; ORGANISM_SCIENTIFIC: DANIO RERIO; ORGANISM_TAXID: 7955	01-JUL-21	12-OCT-21	n/a	26612	0.732	4.49	0.045	1.32	0.002	4.77	0.0072	48.8	0.79	87.4	30.01	5.19	3.13	83.9	0	88.81	1.83229
Q555Q2-F1	AF-Q555Q2-F1-model_v1	ALPHAFOLD V2.0 PREDICTION FOR UNCHARACTERIZED PROTEIN (Q555Q2)	MOL_ID: 1; ORGANISM_SCIENTIFIC: DICTYOSTELIUM DISCOIDEUM; ORGANISM_TAXID: 44689	01-JUL-21	12-OCT-21	n/a	10218.3	0.713	6.14	0.062	0.742	0.0011	3.49	0.0052	48.6	0.79	63.6	20.38	5.57	4.49	10	0	65.37	1.82235
K7N6Y6-F1	AF-K7N6Y6-F1-model_v1	ALPHAFOLD V2.0 PREDICTION FOR PREDICTED GENE 8362 (K7N6Y6)	MOL_ID: 1; ORGANISM_SCIENTIFIC: MUS MUSCULUS; ORGANISM_TAXID: 10090	01-JUL-21	12-OCT-21	n/a	30362.6	0.729	4.06	0.041	1.38	0.0021	5.28	0.008	58	0.94	95.8	33.2	4.88	4.87	82.4	0	79.19	1.81439
Q86W54-F1	AF-Q86W54-F1-model_v1	ALPHAFOLD V2.0 PREDICTION FOR SPERMATOGENESIS-ASSOCIATED PROTEIN 24 (Q86W54)	MOL_ID: 1; ORGANISM_SCIENTIFIC: HOMO SAPIENS; ORGANISM_TAXID: 9606	01-JUL-21	12-OCT-21	n/a	23593.4	0.741	4.57	0.046	1.15	0.0017	4.69	0.0071	52.6	0.85	84.9	28.47	5.82	4.3	84.8	0	88.51	1.81023
K7MME8-F1	AF-K7MME8-F1-model_v1	ALPHAFOLD V2.0 PREDICTION FOR NAB DOMAIN-CONTAINING PROTEIN (K7MME8)	MOL_ID: 1; ORGANISM_SCIENTIFIC: GLYCINE MAX; ORGANISM_TAXID: 3847	01-JUL-21	12-OCT-21	n/a	55192	0.729	2.84	0.029	1.75	0.0028	7.54	0.012	93.9	1.55	136	51.18	8.79	8.7	78.1	0	79.73	1.80371
Q9VHT0-F1	AF-Q9VHT0-F1-model_v1	ALPHAFOLD V2.0 PREDICTION FOR AT23217P (Q9VHT0)	MOL_ID: 1; ORGANISM_SCIENTIFIC: DROSOPHILA MELANOGASTER; ORGANISM_TAXID: 7227	01-JUL-21	12-OCT-21	1-20	25918.5	0.728	4.43	0.045	1.29	0.0019	4.83	0.0073	51.4	0.83	87	30.57	3.98	3.73	81.7	0	84.85	1.80124
P35321-F1	AF-P35321-F1-model_v1	ALPHAFOLD V2.0 PREDICTION FOR CORNIFIN-A (P35321)	MOL_ID: 1; ORGANISM_SCIENTIFIC: HOMO SAPIENS; ORGANISM_TAXID: 9606	01-JUL-21	12-OCT-21	n/a	9884.2	0.728	5.95	0.06	0.659	0.00096	3.6	0.0053	56	0.9	64.8	20.57	7.4	2.81	3.4	0	69.47	1.8
A8KB59-F1	AF-A8KB59-F1-model_v1	ALPHAFOLD V2.0 PREDICTION FOR COILED-COIL DOMAIN-CONTAINING PROTEIN 153 (A8KB59)	MOL_ID: 1; ORGANISM_SCIENTIFIC: DANIO RERIO; ORGANISM_TAXID: 7955	01-JUL-21	12-OCT-21	n/a	23135	0.734	4.69	0.047	1.19	0.0018	4.57	0.0068	47.7	0.77	82.1	27.16	5.76	2.86	84.1	0	88.26	1.7965
A0A0P0Y7U6-F1	AF-A0A0P0Y7U6-F1-model_v1	ALPHAFOLD V2.0 PREDICTION FOR OS12G0198500 PROTEIN (A0A0P0Y7U6)	MOL_ID: 1; ORGANISM_SCIENTIFIC: ORYZA SATIVA SUBSP. JAPONICA; ORGANISM_TAXID: 39947	01-JUL-21	12-OCT-21	n/a	24108	0.742	4.91	0.05	1.26	0.0019	4.37	0.0065	39.9	0.64	78.2	26.55	4.89	2.88	94	0	90.97	1.78947
Q5EB94-F1	AF-Q5EB94-F1-model_v1	ALPHAFOLD V2.0 PREDICTION FOR MYOCARDIAL ZONULA ADHERENS PROTEIN (Q5EB94)	MOL_ID: 1; ORGANISM_SCIENTIFIC: RATTUS NORVEGICUS; ORGANISM_TAXID: 10116	01-JUL-21	12-OCT-21	1-16	52397.3	0.732	3.19	0.032	1.85	0.0026	6.72	0.0096	64	1.03	120	38.22	8.91	7.73	71.9	2.7	78.55	1.78571
A0A0P0VGK8-F1	AF-A0A0P0VGK8-F1-model_v1	ALPHAFOLD V2.0 PREDICTION FOR OS02G0224600 PROTEIN (A0A0P0VGK8)	MOL_ID: 1; ORGANISM_SCIENTIFIC: ORYZA SATIVA SUBSP. JAPONICA; ORGANISM_TAXID: 39947	01-JUL-21	12-OCT-21	n/a	7543.9	0.713	6.96	0.07	0.621	0.00092	3.08	0.0046	45.6	0.74	55	18.9	3.79	3.24	0	0	75.1	1.78571
P35326-F1	AF-P35326-F1-model_v1	ALPHAFOLD V2.0 PREDICTION FOR SMALL PROLINE-RICH PROTEIN 2A (P35326)	MOL_ID: 1; ORGANISM_SCIENTIFIC: HOMO SAPIENS; ORGANISM_TAXID: 9606	01-JUL-21	12-OCT-21	n/a	7972.2	0.722	7.08	0.072	0.647	0.00093	3.03	0.0043	39.7	0.64	54	17.38	5.11	2.22	7	0	77.89	1.78218
Q0J6H4-F1	AF-Q0J6H4-F1-model_v1	ALPHAFOLD V2.0 PREDICTION FOR OS08G0320300 PROTEIN (Q0J6H4)	MOL_ID: 1; ORGANISM_SCIENTIFIC: ORYZA SATIVA SUBSP. JAPONICA; ORGANISM_TAXID: 39947	01-JUL-21	12-OCT-21	n/a	17778.2	0.735	5.65	0.057	1.1	0.0017	3.79	0.0057	36.7	0.59	67.5	23.82	3.15	2.8	98.1	0	95.2	1.781
D3ZBX0-F1	AF-D3ZBX0-F1-model_v1	ALPHAFOLD V2.0 PREDICTION FOR CD207 MOLECULE (D3ZBX0)	MOL_ID: 1; ORGANISM_SCIENTIFIC: RATTUS NORVEGICUS; ORGANISM_TAXID: 10116	01-JUL-21	12-OCT-21	n/a	38164.9	0.736	4.27	0.043	1.77	0.0025	5.02	0.007	35.4	0.56	89.3	27.94	5.72	5.98	54.7	6	86.38	1.77888
Q4D1N2-F1	AF-Q4D1N2-F1-model_v1	ALPHAFOLD V2.0 PREDICTION FOR UNCHARACTERIZED PROTEIN (Q4D1N2)	MOL_ID: 1; ORGANISM_SCIENTIFIC: TRYPANOSOMA CRUZI (STRAIN CL BRENER); ORGANISM_TAXID: 353153	01-JUL-21	12-OCT-21	n/a	23886.6	0.734	4.83	0.049	1.27	0.0019	4.43	0.0065	42.3	0.68	78.8	26.69	4.35	4.02	80.3	0	79.67	1.77878
Q6ZMV7-F1	AF-Q6ZMV7-F1-model_v1	ALPHAFOLD V2.0 PREDICTION FOR LEUCINE-, GLUTAMATE- AND LYSINE-RICH PROTEIN 1 (Q6ZMV7)	MOL_ID: 1; ORGANISM_SCIENTIFIC: HOMO SAPIENS; ORGANISM_TAXID: 9606	01-JUL-21	12-OCT-21	n/a	45164	0.736	3.17	0.032	1.56	0.0024	6.76	0.01	78.6	1.28	120	44	7.46	5.95	77.8	0	80.99	1.77515
Q86SQ7-F1	AF-Q86SQ7-F1-model_v1	ALPHAFOLD V2.0 PREDICTION FOR SEROLOGICALLY DEFINED COLON CANCER ANTIGEN 8 (Q86SQ7)	MOL_ID: 1; ORGANISM_SCIENTIFIC: HOMO SAPIENS; ORGANISM_TAXID: 9606	01-JUL-21	12-OCT-21	n/a	82676.7	0.728	2.43	0.025	2.26	0.0035	8.8	0.013	97.5	1.59	156	55.83	10.97	8.29	81.3	0	77.33	1.77273
O75955-F1	AF-O75955-F1-model_v1	ALPHAFOLD V2.0 PREDICTION FOR FLOTILLIN-1 (O75955)	MOL_ID: 1; ORGANISM_SCIENTIFIC: HOMO SAPIENS; ORGANISM_TAXID: 9606	01-JUL-21	12-OCT-21	n/a	47364.2	0.738	3.72	0.038	1.9	0.0026	5.76	0.0079	40.9	0.65	102	29.92	14.28	5.27	67.8	10.6	81.91	1.77083
A0A0R0H264-F1	AF-A0A0R0H264-F1-model_v1	ALPHAFOLD V2.0 PREDICTION FOR UNCHARACTERIZED PROTEIN (A0A0R0H264)	MOL_ID: 1; ORGANISM_SCIENTIFIC: GLYCINE MAX; ORGANISM_TAXID: 3847	01-JUL-21	12-OCT-21	1-24	10914.9	0.728	6.15	0.062	0.752	0.0011	3.49	0.0051	44.2	0.71	61.8	21.04	4.66	3.42	0	0	81.05	1.77077
Q9NUD7-F1	AF-Q9NUD7-F1-model_v1	ALPHAFOLD V2.0 PREDICTION FOR UNCHARACTERIZED PROTEIN C20ORF96 (Q9NUD7)	MOL_ID: 1; ORGANISM_SCIENTIFIC: HOMO SAPIENS; ORGANISM_TAXID: 9606	01-JUL-21	12-OCT-21	n/a	42873.2	0.739	3.39	0.034	1.56	0.0024	6.33	0.0096	69	1.12	112	38.62	9.45	5.19	66.8	0	76.07	1.76935
D3ZJ05-F1	AF-D3ZJ05-F1-model_v1	ALPHAFOLD V2.0 PREDICTION FOR RCG40975 (D3ZJ05)	MOL_ID: 1; ORGANISM_SCIENTIFIC: RATTUS NORVEGICUS; ORGANISM_TAXID: 10116	01-JUL-21	12-OCT-21	n/a	8615.4	0.715	6.76	0.068	0.684	0.001	3.17	0.0047	42.4	0.69	55.6	19.18	4.2	2.63	5.3	0	62.15	1.75394
O45420-F1	AF-O45420-F1-model_v1	ALPHAFOLD V2.0 PREDICTION FOR PLECKSTRIN HOMOLOGY DOMAIN-CONTAINING FAMILY D MEMBER 1 (O45420)	MOL_ID: 1; ORGANISM_SCIENTIFIC: CAENORHABDITIS ELEGANS; ORGANISM_TAXID: 6239	01-JUL-21	12-OCT-21	n/a	66427.4	0.737	2.98	0.03	2.15	0.003	7.19	0.01	55	0.88	126	40.97	8.97	8.49	55.5	6.5	73.23	1.75243
Q4G0S7-F1	AF-Q4G0S7-F1-model_v1	ALPHAFOLD V2.0 PREDICTION FOR COILED-COIL DOMAIN-CONTAINING PROTEIN 152 (Q4G0S7)	MOL_ID: 1; ORGANISM_SCIENTIFIC: HOMO SAPIENS; ORGANISM_TAXID: 9606	01-JUL-21	12-OCT-21	n/a	29992.5	0.743	4.06	0.041	1.29	0.0019	5.28	0.0077	56.1	0.9	92.5	30.71	8.22	3.85	86.6	0	87.19	1.75189
Q4CZ33-F1	AF-Q4CZ33-F1-model_v1	ALPHAFOLD V2.0 PREDICTION FOR COILED-COIL DOMAIN-CONTAINING PROTEIN 153 (Q4CZ33)	MOL_ID: 1; ORGANISM_SCIENTIFIC: TRYPANOSOMA CRUZI (STRAIN CL BRENER); ORGANISM_TAXID: 353153	01-JUL-21	12-OCT-21	n/a	19882.6	0.729	5.14	0.052	1.14	0.0018	4.17	0.0064	45	0.73	73	26.43	4.25	2.62	89.3	0	90.64	1.7506
P22532-F1	AF-P22532-F1-model_v1	ALPHAFOLD V2.0 PREDICTION FOR SMALL PROLINE-RICH PROTEIN 2D (P22532)	MOL_ID: 1; ORGANISM_SCIENTIFIC: HOMO SAPIENS; ORGANISM_TAXID: 9606	01-JUL-21	12-OCT-21	n/a	7912.1	0.722	7.17	0.072	0.65	0.00092	2.99	0.0042	37	0.59	52.1	16.27	5.67	2.1	15.5	0	77.01	1.74247
Q8IXL9-F1	AF-Q8IXL9-F1-model_v1	ALPHAFOLD V2.0 PREDICTION FOR IQ DOMAIN-CONTAINING PROTEIN F2 (Q8IXL9)	MOL_ID: 1; ORGANISM_SCIENTIFIC: HOMO SAPIENS; ORGANISM_TAXID: 9606	01-JUL-21	12-OCT-21	n/a	19653.1	0.753	5.52	0.056	1.1	0.0016	3.88	0.0057	33.1	0.53	67.6	22.21	5.09	2.95	74.2	14.7	88.85	1.74227
Q9BT92-F1	AF-Q9BT92-F1-model_v1	ALPHAFOLD V2.0 PREDICTION FOR TRICHOPLEIN KERATIN FILAMENT-BINDING PROTEIN (Q9BT92)	MOL_ID: 1; ORGANISM_SCIENTIFIC: HOMO SAPIENS; ORGANISM_TAXID: 9606	01-JUL-21	12-OCT-21	n/a	61078.4	0.725	3.03	0.031	2.1	0.0032	7.06	0.011	66	1.08	123	44.6	9.18	6.66	91.5	0	83.7	1.74221
Q9W4L0-F1	AF-Q9W4L0-F1-model_v1	ALPHAFOLD V2.0 PREDICTION FOR UNCHARACTERIZED PROTEIN (Q9W4L0)	MOL_ID: 1; ORGANISM_SCIENTIFIC: DROSOPHILA MELANOGASTER; ORGANISM_TAXID: 7227	01-JUL-21	12-OCT-21	n/a	49225.9	0.732	3.27	0.033	1.78	0.0026	6.55	0.0094	61.3	0.99	114	38.09	7.96	7.52	68.9	0	72.68	1.74046
A0A1D6E571-F1	AF-A0A1D6E571-F1-model_v1	ALPHAFOLD V2.0 PREDICTION FOR UNCHARACTERIZED PROTEIN (A0A1D6E571)	MOL_ID: 1; ORGANISM_SCIENTIFIC: ZEA MAYS; ORGANISM_TAXID: 4577	01-JUL-21	12-OCT-21	n/a	23562	0.735	5.02	0.051	1.29	0.0019	4.27	0.0062	37	0.59	74.2	24.57	5.74	3.53	72.8	3.9	86.32	1.7377
Q4D150-F1	AF-Q4D150-F1-model_v1	ALPHAFOLD V2.0 PREDICTION FOR UNCHARACTERIZED PROTEIN (Q4D150)	MOL_ID: 1; ORGANISM_SCIENTIFIC: TRYPANOSOMA CRUZI (STRAIN CL BRENER); ORGANISM_TAXID: 353153	01-JUL-21	12-OCT-21	n/a	48481.1	0.728	3.58	0.036	1.95	0.003	5.99	0.0092	52.8	0.86	104	39.12	5.68	3.96	92.8	0	86.66	1.73623
Q20248-F1	AF-Q20248-F1-model_v1	ALPHAFOLD V2.0 PREDICTION FOR UNCHARACTERIZED PROTEIN (Q20248)	MOL_ID: 1; ORGANISM_SCIENTIFIC: CAENORHABDITIS ELEGANS; ORGANISM_TAXID: 6239	01-JUL-21	12-OCT-21	n/a	22167	0.739	5.36	0.054	1.28	0.0018	4	0.0058	31.6	0.51	69.3	23.25	4.05	4.16	85.3	0	89.79	1.7325
D3Z235-F1	AF-D3Z235-F1-model_v1	ALPHAFOLD V2.0 PREDICTION FOR PREDICTED GENE 3543 (D3Z235)	MOL_ID: 1; ORGANISM_SCIENTIFIC: MUS MUSCULUS; ORGANISM_TAXID: 10090	01-JUL-21	12-OCT-21	n/a	21506.1	0.736	4.74	0.048	1.11	0.0017	4.52	0.0069	53.4	0.87	78.3	28.96	5.51	2.8	80.3	0	87.29	1.7323
Q9NUQ3-F1	AF-Q9NUQ3-F1-model_v1	ALPHAFOLD V2.0 PREDICTION FOR GAMMA-TAXILIN (Q9NUQ3)	MOL_ID: 1; ORGANISM_SCIENTIFIC: HOMO SAPIENS; ORGANISM_TAXID: 9606	01-JUL-21	12-OCT-21	n/a	60598.4	0.732	2.74	0.028	1.84	0.0027	7.81	0.012	84.4	1.37	135	48.34	9.28	8.32	63.6	0	72.7	1.72855
A0A0N7KS97-F1	AF-A0A0N7KS97-F1-model_v1	ALPHAFOLD V2.0 PREDICTION FOR OS10G0577100 PROTEIN (A0A0N7KS97)	MOL_ID: 1; ORGANISM_SCIENTIFIC: ORYZA SATIVA SUBSP. JAPONICA; ORGANISM_TAXID: 39947	01-JUL-21	12-OCT-21	n/a	105601	0.731	2	0.02	2.34	0.0036	10.7	0.017	134	2.2	184	71.37	12.96	10.58	69.8	0	72.26	1.71963
A0A2R8RID0-F1	AF-A0A2R8RID0-F1-model_v1	ALPHAFOLD V2.0 PREDICTION FOR BIOGENESIS OF LYSOSOME-RELATED ORGANELLES COMPLEX 1 SUBUNIT 5 (A0A2R8RID0)	MOL_ID: 1; ORGANISM_SCIENTIFIC: DANIO RERIO; ORGANISM_TAXID: 7955	01-JUL-21	12-OCT-21	n/a	18532.4	0.725	5.66	0.057	1.19	0.0018	3.78	0.0056	33.6	0.54	65	23.37	3.29	2.74	96.1	0	93.84	1.71958
Q6NSX1-F1	AF-Q6NSX1-F1-model_v1	ALPHAFOLD V2.0 PREDICTION FOR COILED-COIL DOMAIN-CONTAINING PROTEIN 70 (Q6NSX1)	MOL_ID: 1; ORGANISM_SCIENTIFIC: HOMO SAPIENS; ORGANISM_TAXID: 9606	01-JUL-21	12-OCT-21	1-32	25070.6	0.728	4.6	0.046	1.29	0.0019	4.66	0.0067	45.4	0.73	80.1	27.65	6.04	3.39	84.5	0	85.78	1.71888
B2RV13-F1	AF-B2RV13-F1-model_v1	ALPHAFOLD V2.0 PREDICTION FOR SPERM AXONEMAL MAINTENANCE PROTEIN CFAP97D1 (B2RV13)	MOL_ID: 1; ORGANISM_SCIENTIFIC: HOMO SAPIENS; ORGANISM_TAXID: 9606	01-JUL-21	12-OCT-21	n/a	19567.1	0.731	5.3	0.053	1.15	0.0016	4.05	0.0057	36.3	0.58	69.5	21.96	6.63	3.45	57.1	0	84.58	1.71605
Q79FY7-F1	AF-Q79FY7-F1-model_v1	ALPHAFOLD V2.0 PREDICTION FOR MCE-FAMILY PROTEIN MCE2A (Q79FY7)	MOL_ID: 1; ORGANISM_SCIENTIFIC: MYCOBACTERIUM TUBERCULOSIS (STRAIN ATCC 25618 / H37RV); ORGANISM_TAXID: 83332	01-JUL-21	12-OCT-21	n/a	43485.9	0.741	4.04	0.041	1.87	0.0027	5.31	0.0075	36.4	0.58	91	30.13	6.98	6.04	47.9	11.7	85.22	1.71375
Q8C2K1-F1	AF-Q8C2K1-F1-model_v1	ALPHAFOLD V2.0 PREDICTION FOR DIFFERENTIALLY EXPRESSED IN FDCP 6 (Q8C2K1)	MOL_ID: 1; ORGANISM_SCIENTIFIC: MUS MUSCULUS; ORGANISM_TAXID: 10090	01-JUL-21	12-OCT-21	n/a	73458.9	0.73	3.14	0.032	2.57	0.0036	6.83	0.0096	45.5	0.73	117	38.37	9.12	6.65	59	5.6	77.9	1.71303
Q0JF96-F1	AF-Q0JF96-F1-model_v1	ALPHAFOLD V2.0 PREDICTION FOR OS04G0126500 PROTEIN (Q0JF96)	MOL_ID: 1; ORGANISM_SCIENTIFIC: ORYZA SATIVA SUBSP. JAPONICA; ORGANISM_TAXID: 39947	01-JUL-21	12-OCT-21	n/a	10567.6	0.726	6.47	0.065	0.772	0.0011	3.31	0.0047	37.1	0.59	56.7	18.03	5.54	3.16	30.3	0	64.48	1.71299
A0A0R0H2U0-F1	AF-A0A0R0H2U0-F1-model_v1	ALPHAFOLD V2.0 PREDICTION FOR UNCHARACTERIZED PROTEIN (A0A0R0H2U0)	MOL_ID: 1; ORGANISM_SCIENTIFIC: GLYCINE MAX; ORGANISM_TAXID: 3847	01-JUL-21	12-OCT-21	1-16	11491.6	0.762	5.89	0.06	0.665	0.00095	3.64	0.0052	45.6	0.73	62.3	20.98	5.2	2.59	0	0	68.99	1.71154
Q5T0U0-F1	AF-Q5T0U0-F1-model_v1	ALPHAFOLD V2.0 PREDICTION FOR COILED-COIL DOMAIN-CONTAINING PROTEIN 122 (Q5T0U0)	MOL_ID: 1; ORGANISM_SCIENTIFIC: HOMO SAPIENS; ORGANISM_TAXID: 9606	01-JUL-21	12-OCT-21	n/a	32211.5	0.734	3.79	0.038	1.34	0.002	5.65	0.0084	66.1	1.08	96.7	33.16	13.23	4.99	89	0	88.13	1.7115
A0A0P0WWD6-F1	AF-A0A0P0WWD6-F1-model_v1	ALPHAFOLD V2.0 PREDICTION FOR OS06G0357000 PROTEIN (A0A0P0WWD6)	MOL_ID: 1; ORGANISM_SCIENTIFIC: ORYZA SATIVA SUBSP. JAPONICA; ORGANISM_TAXID: 39947	01-JUL-21	12-OCT-21	n/a	19541	0.741	5.5	0.056	1.15	0.0016	3.9	0.0056	32.7	0.52	66.7	22.01	3.96	4.37	90.5	0	91.65	1.71026
A0A0G2L5W1-F1	AF-A0A0G2L5W1-F1-model_v1	ALPHAFOLD V2.0 PREDICTION FOR SI:DKEY-225F5.4 (A0A0G2L5W1)	MOL_ID: 1; ORGANISM_SCIENTIFIC: DANIO RERIO; ORGANISM_TAXID: 7955	01-JUL-21	12-OCT-21	n/a	43058.5	0.739	4.32	0.044	2	0.0028	4.96	0.0069	28.9	0.46	84.8	26.28	6.69	6.22	57.8	12.7	84.08	1.70968
Q9VFL3-F1	AF-Q9VFL3-F1-model_v1	ALPHAFOLD V2.0 PREDICTION FOR FI08014P (Q9VFL3)	MOL_ID: 1; ORGANISM_SCIENTIFIC: DROSOPHILA MELANOGASTER; ORGANISM_TAXID: 7227	01-JUL-21	12-OCT-21	1-31	25646.1	0.729	4.57	0.046	1.31	0.002	4.68	0.007	44.9	0.73	80	29.3	5.02	3.48	78.1	0	83.74	1.7094
Q98TZ8-F1	AF-Q98TZ8-F1-model_v1	ALPHAFOLD V2.0 PREDICTION FOR FLOTILLIN-2A (Q98TZ8)	MOL_ID: 1; ORGANISM_SCIENTIFIC: DANIO RERIO; ORGANISM_TAXID: 7955	01-JUL-21	12-OCT-21	n/a	46916.2	0.745	3.72	0.038	1.84	0.0025	5.76	0.0077	39.8	0.63	98.2	28.98	13.14	5.76	68.4	11.2	81.68	1.70486
Q4R142-F1	AF-Q4R142-F1-model_v1	ALPHAFOLD V2.0 PREDICTION FOR UNCHARACTERIZED PROTEIN (Q4R142)	MOL_ID: 1; ORGANISM_SCIENTIFIC: CAENORHABDITIS ELEGANS; ORGANISM_TAXID: 6239	01-JUL-21	12-OCT-21	1-20	26568.9	0.754	4.44	0.045	1.2	0.0018	4.83	0.0071	47.8	0.77	81.8	29.35	4.98	3.73	81.9	0	81.76	1.69358
M0R6S6-F1	AF-M0R6S6-F1-model_v1	ALPHAFOLD V2.0 PREDICTION FOR TAKUSAN DOMAIN-CONTAINING PROTEIN (M0R6S6)	MOL_ID: 1; ORGANISM_SCIENTIFIC: RATTUS NORVEGICUS; ORGANISM_TAXID: 10116	01-JUL-21	12-OCT-21	n/a	20052.7	0.733	5.04	0.051	1.11	0.0017	4.26	0.0067	47.3	0.78	72	28.61	3.6	3.02	83.3	0	84.57	1.69014
A0A1D6HA21-F1	AF-A0A1D6HA21-F1-model_v1	ALPHAFOLD V2.0 PREDICTION FOR GOLGIN CANDIDATE 2 (A0A1D6HA21)	MOL_ID: 1; ORGANISM_SCIENTIFIC: ZEA MAYS; ORGANISM_TAXID: 4577	01-JUL-21	12-OCT-21	n/a	17155.9	0.746	6.06	0.061	1.09	0.0016	3.53	0.0051	27.8	0.45	59.6	20.13	3.47	3.41	87.8	0	90.74	1.68839
A0A0P0WUI0-F1	AF-A0A0P0WUI0-F1-model_v1	ALPHAFOLD V2.0 PREDICTION FOR OS06G0244200 PROTEIN (A0A0P0WUI0)	MOL_ID: 1; ORGANISM_SCIENTIFIC: ORYZA SATIVA SUBSP. JAPONICA; ORGANISM_TAXID: 39947	01-JUL-21	12-OCT-21	n/a	13706.4	0.734	6.5	0.066	0.977	0.0015	3.3	0.0049	29.6	0.48	55.4	20.42	3.15	2.33	92.2	0	92.49	1.67879
P78537-F1	AF-P78537-F1-model_v1	ALPHAFOLD V2.0 PREDICTION FOR BIOGENESIS OF LYSOSOME-RELATED ORGANELLES COMPLEX 1 SUBUNIT 1 (P78537)	MOL_ID: 1; ORGANISM_SCIENTIFIC: HOMO SAPIENS; ORGANISM_TAXID: 9606	01-JUL-21	12-OCT-21	n/a	17270	0.729	5.44	0.055	1.05	0.0015	3.94	0.0058	41.4	0.67	66	23.37	6.7	3.02	82.2	0	88.94	1.67513
B0S753-F1	AF-B0S753-F1-model_v1	ALPHAFOLD V2.0 PREDICTION FOR OUTER DENSE FIBER OF SPERM TAILS 2B (B0S753)	MOL_ID: 1; ORGANISM_SCIENTIFIC: DANIO RERIO; ORGANISM_TAXID: 7955	01-JUL-21	12-OCT-21	n/a	93806.4	0.727	2.37	0.024	2.5	0.0039	9.04	0.014	92.3	1.51	151	59.54	12.06	8.1	81.8	1	81.21	1.67035
A4HU32-F1	AF-A4HU32-F1-model_v1	ALPHAFOLD V2.0 PREDICTION FOR HYPOTHETICAL_PROTEIN_-__CONSERVED (A4HU32)	MOL_ID: 1; ORGANISM_SCIENTIFIC: LEISHMANIA INFANTUM; ORGANISM_TAXID: 5671	01-JUL-21	12-OCT-21	n/a	28089.7	0.736	4.89	0.049	1.5	0.0021	4.38	0.0062	30.7	0.49	73.1	23.52	6.73	4.77	69.7	1.6	75.68	1.66895
I1M0B0-F1	AF-I1M0B0-F1-model_v1	ALPHAFOLD V2.0 PREDICTION FOR UNCHARACTERIZED PROTEIN (I1M0B0)	MOL_ID: 1; ORGANISM_SCIENTIFIC: GLYCINE MAX; ORGANISM_TAXID: 3847	01-JUL-21	12-OCT-21	n/a	24360.6	0.733	4.67	0.047	1.25	0.0017	4.59	0.0064	41.2	0.66	76.6	25.66	6.02	5.21	75.1	0	83.75	1.66885
A0A0G2JYV7-F1	AF-A0A0G2JYV7-F1-model_v1	ALPHAFOLD V2.0 PREDICTION FOR TESTIS-EXPRESSED 13B (A0A0G2JYV7)	MOL_ID: 1; ORGANISM_SCIENTIFIC: RATTUS NORVEGICUS; ORGANISM_TAXID: 10116	01-JUL-21	12-OCT-21	n/a	22453.6	0.735	5.47	0.055	1.34	0.002	3.92	0.0057	29.7	0.48	65.4	23.2	4.6	2.78	78.2	0	88.05	1.66837
A0A1P8BA64-F1	AF-A0A1P8BA64-F1-model_v1	ALPHAFOLD V2.0 PREDICTION FOR UNCHARACTERIZED PROTEIN (A0A1P8BA64)	MOL_ID: 1; ORGANISM_SCIENTIFIC: ARABIDOPSIS THALIANA; ORGANISM_TAXID: 3702	01-JUL-21	12-OCT-21	n/a	5798.6	0.739	8.88	0.09	0.554	0.00079	2.41	0.0034	25.7	0.41	40.2	13.73	3.22	1.98	8.9	0	59.54	1.66805
Q4CL51-F1	AF-Q4CL51-F1-model_v1	ALPHAFOLD V2.0 PREDICTION FOR UNCHARACTERIZED PROTEIN (Q4CL51)	MOL_ID: 1; ORGANISM_SCIENTIFIC: TRYPANOSOMA CRUZI (STRAIN CL BRENER); ORGANISM_TAXID: 353153	01-JUL-21	12-OCT-21	n/a	64404.7	0.719	2.9	0.029	2.17	0.0033	7.38	0.011	71.1	1.15	123	46.44	7.05	4.63	96.5	0	77.92	1.66667
A0A1D6FI13-F1	AF-A0A1D6FI13-F1-model_v1	ALPHAFOLD V2.0 PREDICTION FOR UNCHARACTERIZED PROTEIN (A0A1D6FI13)	MOL_ID: 1; ORGANISM_SCIENTIFIC: ZEA MAYS; ORGANISM_TAXID: 4577	01-JUL-21	12-OCT-21	n/a	15642.3	0.723	6.09	0.062	1.09	0.0016	3.52	0.0051	30.5	0.49	58.6	21.04	3.5	2.8	97.1	0	95.3	1.66477
Q4DFB4-F1	AF-Q4DFB4-F1-model_v1	ALPHAFOLD V2.0 PREDICTION FOR UNCHARACTERIZED PROTEIN (Q4DFB4)	MOL_ID: 1; ORGANISM_SCIENTIFIC: TRYPANOSOMA CRUZI (STRAIN CL BRENER); ORGANISM_TAXID: 353153	01-JUL-21	12-OCT-21	n/a	41910.6	0.73	3.78	0.038	1.77	0.0024	5.66	0.0078	42.5	0.68	94.1	31.23	7.46	4.58	84.6	0	82.56	1.66254
Q3E9B1-F1	AF-Q3E9B1-F1-model_v1	ALPHAFOLD V2.0 PREDICTION FOR HYDROXYPROLINE-RICH GLYCOPROTEIN FAMILY PROTEIN (Q3E9B1)	MOL_ID: 1; ORGANISM_SCIENTIFIC: ARABIDOPSIS THALIANA; ORGANISM_TAXID: 3702	01-JUL-21	12-OCT-21	1-23	8045.6	0.738	7.41	0.075	0.644	0.00088	2.89	0.004	30.8	0.49	48	14.96	6.8	2.76	20.8	0	72.63	1.6609
O16898-F1	AF-O16898-F1-model_v1	ALPHAFOLD V2.0 PREDICTION FOR PROTEIN CONTAINING ALS2CR12 (ALS2CR12) SIGNATURE (O16898)	MOL_ID: 1; ORGANISM_SCIENTIFIC: CAENORHABDITIS ELEGANS; ORGANISM_TAXID: 6239	01-JUL-21	12-OCT-21	n/a	43724.2	0.727	4.66	0.047	2.29	0.0032	4.59	0.0064	22.5	0.36	76.2	25.19	4.14	4.13	92.1	0	88.92	1.66013
K7KIM5-F1	AF-K7KIM5-F1-model_v1	ALPHAFOLD V2.0 PREDICTION FOR UNCHARACTERIZED PROTEIN (K7KIM5)	MOL_ID: 1; ORGANISM_SCIENTIFIC: GLYCINE MAX; ORGANISM_TAXID: 3847	01-JUL-21	12-OCT-21	n/a	15397.6	0.743	6.31	0.064	1.03	0.0015	3.4	0.0049	27.3	0.44	56.3	19.92	3.91	2.5	87.8	0	87.04	1.65588
A0A5K1I8S3-F1	AF-A0A5K1I8S3-F1-model_v1	ALPHAFOLD V2.0 PREDICTION FOR UNCHARACTERIZED PROTEIN (A0A5K1I8S3)	MOL_ID: 1; ORGANISM_SCIENTIFIC: CAENORHABDITIS ELEGANS; ORGANISM_TAXID: 6239	01-JUL-21	12-OCT-21	n/a	6319.8	0.744	8.09	0.082	0.54	0.00075	2.65	0.0037	30.5	0.49	43.8	14.02	4.62	2.7	0	0	68.36	1.65283
Q54GZ1-F1	AF-Q54GZ1-F1-model_v1	ALPHAFOLD V2.0 PREDICTION FOR B BOX-TYPE DOMAIN-CONTAINING PROTEIN (Q54GZ1)	MOL_ID: 1; ORGANISM_SCIENTIFIC: DICTYOSTELIUM DISCOIDEUM; ORGANISM_TAXID: 44689	01-JUL-21	12-OCT-21	n/a	21646.4	0.753	5.5	0.056	1.21	0.0017	3.89	0.0055	28.9	0.47	64.1	21.01	5.27	6.33	67.9	4.8	92.04	1.64781
Q4DDA8-F1	AF-Q4DDA8-F1-model_v1	ALPHAFOLD V2.0 PREDICTION FOR UNCHARACTERIZED PROTEIN (Q4DDA8)	MOL_ID: 1; ORGANISM_SCIENTIFIC: TRYPANOSOMA CRUZI (STRAIN CL BRENER); ORGANISM_TAXID: 353153	01-JUL-21	12-OCT-21	n/a	78630.8	0.721	2.45	0.025	2.22	0.0033	8.74	0.013	89.6	1.45	144	52.35	17.23	9.49	65.6	0	68.74	1.6476
D3ZY42-F1	AF-D3ZY42-F1-model_v1	ALPHAFOLD V2.0 PREDICTION FOR TRICHOPLEIN KERATIN FILAMENT-BINDING PROTEIN (D3ZY42)	MOL_ID: 1; ORGANISM_SCIENTIFIC: RATTUS NORVEGICUS; ORGANISM_TAXID: 10116	01-JUL-21	12-OCT-21	n/a	60515	0.726	3.1	0.031	2.12	0.003	6.92	0.0099	58.5	0.94	114	40.33	11.95	8.23	91.5	0	84.07	1.6474
A4I5M7-F1	AF-A4I5M7-F1-model_v1	ALPHAFOLD V2.0 PREDICTION FOR INTRAFLAGELLAR_TRANSPORT_(IFT)_PROTEIN_-_PUTATIVE (A4I5M7)	MOL_ID: 1; ORGANISM_SCIENTIFIC: LEISHMANIA INFANTUM; ORGANISM_TAXID: 5671	01-JUL-21	12-OCT-21	n/a	15466	0.732	6.54	0.066	1.12	0.0016	3.28	0.0046	23.9	0.38	54	18.23	3.3	2.59	82.8	0	92.92	1.64634
A8MT33-F1	AF-A8MT33-F1-model_v1	ALPHAFOLD V2.0 PREDICTION FOR SYNAPTONEMAL COMPLEX CENTRAL ELEMENT PROTEIN 1-LIKE (A8MT33)	MOL_ID: 1; ORGANISM_SCIENTIFIC: HOMO SAPIENS; ORGANISM_TAXID: 9606	01-JUL-21	12-OCT-21	n/a	27385.8	0.736	4.15	0.042	1.24	0.0017	5.17	0.0073	53.7	0.86	85.1	28.68	8.59	4.06	69.7	0	79.31	1.64603
A0A0P0XUF4-F1	AF-A0A0P0XUF4-F1-model_v1	ALPHAFOLD V2.0 PREDICTION FOR OS10G0433200 PROTEIN (A0A0P0XUF4)	MOL_ID: 1; ORGANISM_SCIENTIFIC: ORYZA SATIVA SUBSP. JAPONICA; ORGANISM_TAXID: 39947	01-JUL-21	12-OCT-21	n/a	10333.6	0.706	6.01	0.061	0.752	0.0011	3.57	0.005	45.3	0.72	58.6	19.98	5.15	2.71	0	0	60.83	1.64146
Q4DB14-F1	AF-Q4DB14-F1-model_v1	ALPHAFOLD V2.0 PREDICTION FOR INTRAFLAGELLAR TRANSPORT (IFT) PROTEIN, PUTATIVE (Q4DB14)	MOL_ID: 1; ORGANISM_SCIENTIFIC: TRYPANOSOMA CRUZI (STRAIN CL BRENER); ORGANISM_TAXID: 353153	01-JUL-21	12-OCT-21	n/a	15430	0.73	6.51	0.066	1.12	0.0016	3.29	0.0047	23.9	0.38	54	18.12	3.37	2.95	83	0	93.09	1.64134
E9PZN8-F1	AF-E9PZN8-F1-model_v1	ALPHAFOLD V2.0 PREDICTION FOR PREDICTED GENE 5795 (E9PZN8)	MOL_ID: 1; ORGANISM_SCIENTIFIC: MUS MUSCULUS; ORGANISM_TAXID: 10090	01-JUL-21	12-OCT-21	n/a	30934.1	0.732	4.3	0.043	1.47	0.0021	4.98	0.007	41.1	0.66	81.7	27.39	5.69	5.1	82.1	0	77.33	1.64056
Q4CMD4-F1	AF-Q4CMD4-F1-model_v1	ALPHAFOLD V2.0 PREDICTION FOR UNCHARACTERIZED PROTEIN (Q4CMD4)	MOL_ID: 1; ORGANISM_SCIENTIFIC: TRYPANOSOMA CRUZI (STRAIN CL BRENER); ORGANISM_TAXID: 353153	01-JUL-21	12-OCT-21	n/a	59041.6	0.737	3.48	0.035	2.23	0.0032	6.16	0.0087	40.2	0.64	101	35.17	6.45	4.62	93	0	79.16	1.63961
C6SWN6-F1	AF-C6SWN6-F1-model_v1	ALPHAFOLD V2.0 PREDICTION FOR UNCHARACTERIZED PROTEIN (C6SWN6)	MOL_ID: 1; ORGANISM_SCIENTIFIC: GLYCINE MAX; ORGANISM_TAXID: 3847	01-JUL-21	12-OCT-21	n/a	15097	0.735	6.43	0.065	1.06	0.0015	3.33	0.0048	26.9	0.43	54.5	19.8	3.43	2.18	98.4	0	90.53	1.63664
Q4DCJ5-F1	AF-Q4DCJ5-F1-model_v1	ALPHAFOLD V2.0 PREDICTION FOR UNCHARACTERIZED PROTEIN (Q4DCJ5)	MOL_ID: 1; ORGANISM_SCIENTIFIC: TRYPANOSOMA CRUZI (STRAIN CL BRENER); ORGANISM_TAXID: 353153	01-JUL-21	12-OCT-21	n/a	34105.2	0.727	4.08	0.041	1.57	0.0023	5.25	0.0077	44.7	0.72	85.8	30.38	7.28	5.03	69.4	0	78.02	1.63429
J3QM54-F1	AF-J3QM54-F1-model_v1	ALPHAFOLD V2.0 PREDICTION FOR PREDICTED GENE 3727 (J3QM54)	MOL_ID: 1; ORGANISM_SCIENTIFIC: MUS MUSCULUS; ORGANISM_TAXID: 10090	01-JUL-21	12-OCT-21	n/a	24114.6	0.728	4.84	0.049	1.31	0.0019	4.42	0.0064	39.1	0.63	72.2	25.91	5.55	3.4	80.9	0	81.52	1.63348
L7N474-F1	AF-L7N474-F1-model_v1	ALPHAFOLD V2.0 PREDICTION FOR PREDICTED GENE 5861 (L7N474)	MOL_ID: 1; ORGANISM_SCIENTIFIC: MUS MUSCULUS; ORGANISM_TAXID: 10090	01-JUL-21	12-OCT-21	n/a	18257.7	0.735	5.54	0.056	1.11	0.0016	3.87	0.0056	34.1	0.55	63.2	21.79	6.07	3.92	81.7	0	84.86	1.63307
A0A1D6H0U8-F1	AF-A0A1D6H0U8-F1-model_v1	ALPHAFOLD V2.0 PREDICTION FOR UNCHARACTERIZED PROTEIN (A0A1D6H0U8)	MOL_ID: 1; ORGANISM_SCIENTIFIC: ZEA MAYS; ORGANISM_TAXID: 4577	01-JUL-21	12-OCT-21	n/a	8002.2	0.725	7.02	0.071	0.637	0.0009	3.05	0.0043	37.6	0.6	49.8	16.99	5.33	2.71	0	0	64.35	1.63279
P40222-F1	AF-P40222-F1-model_v1	ALPHAFOLD V2.0 PREDICTION FOR ALPHA-TAXILIN (P40222)	MOL_ID: 1; ORGANISM_SCIENTIFIC: HOMO SAPIENS; ORGANISM_TAXID: 9606	01-JUL-21	12-OCT-21	n/a	61897.2	0.724	2.84	0.029	2	0.0029	7.55	0.011	70.2	1.13	123	45.33	9.35	8.27	62.2	0	73.44	1.62914
Q96BQ5-F1	AF-Q96BQ5-F1-model_v1	ALPHAFOLD V2.0 PREDICTION FOR COILED-COIL DOMAIN-CONTAINING PROTEIN 127 (Q96BQ5)	MOL_ID: 1; ORGANISM_SCIENTIFIC: HOMO SAPIENS; ORGANISM_TAXID: 9606	01-JUL-21	12-OCT-21	n/a	30844.5	0.735	4.97	0.05	1.67	0.0023	4.31	0.0059	26.5	0.42	70.2	22.39	6.71	4.07	78.8	0	87.08	1.62877
Q96RM1-F1	AF-Q96RM1-F1-model_v1	ALPHAFOLD V2.0 PREDICTION FOR SMALL PROLINE-RICH PROTEIN 2F (Q96RM1)	MOL_ID: 1; ORGANISM_SCIENTIFIC: HOMO SAPIENS; ORGANISM_TAXID: 9606	01-JUL-21	12-OCT-21	n/a	7812	0.72	7.35	0.074	0.663	0.0009	2.92	0.0039	31	0.49	47.5	13.8	7.12	2.3	15.5	0	75.23	1.62671
K7MMR4-F1	AF-K7MMR4-F1-model_v1	ALPHAFOLD V2.0 PREDICTION FOR UNCHARACTERIZED PROTEIN (K7MMR4)	MOL_ID: 1; ORGANISM_SCIENTIFIC: GLYCINE MAX; ORGANISM_TAXID: 3847	01-JUL-21	12-OCT-21	n/a	13859.5	0.735	6.62	0.067	1	0.0014	3.24	0.0047	26.3	0.42	52.7	19.27	3.27	2.46	94.1	0	90.37	1.62654
Q9U2P6-F1	AF-Q9U2P6-F1-model_v1	ALPHAFOLD V2.0 PREDICTION FOR PROTEIN CONTAINING ALS2CR12 (ALS2CR12) SIGNATURE (Q9U2P6)	MOL_ID: 1; ORGANISM_SCIENTIFIC: CAENORHABDITIS ELEGANS; ORGANISM_TAXID: 6239	01-JUL-21	12-OCT-21	n/a	43476.2	0.729	4.13	0.042	2.01	0.0029	5.18	0.0075	34.9	0.56	84.1	30.35	6.3	3.92	84.2	0	83.44	1.62355
Q86HA0-F1	AF-Q86HA0-F1-model_v1	ALPHAFOLD V2.0 PREDICTION FOR PUTATIVE UNCHARACTERIZED PROTEIN DDB_G0275565 (Q86HA0)	MOL_ID: 1; ORGANISM_SCIENTIFIC: DICTYOSTELIUM DISCOIDEUM; ORGANISM_TAXID: 44689	01-JUL-21	12-OCT-21	n/a	7544	0.689	8.33	0.084	0.805	0.0011	2.57	0.0036	24.1	0.38	41.7	14.73	2.21	2.11	39.1	0	70.21	1.62257
Q9Y605-F1	AF-Q9Y605-F1-model_v1	ALPHAFOLD V2.0 PREDICTION FOR MORF4 FAMILY-ASSOCIATED PROTEIN 1 (Q9Y605)	MOL_ID: 1; ORGANISM_SCIENTIFIC: HOMO SAPIENS; ORGANISM_TAXID: 9606	01-JUL-21	12-OCT-21	n/a	14640.1	0.734	5.96	0.06	0.956	0.0014	3.6	0.0053	35.5	0.57	58.4	22.08	3.68	3.44	78.6	0	81.34	1.62222
Q9UJC3-F1	AF-Q9UJC3-F1-model_v1	ALPHAFOLD V2.0 PREDICTION FOR PROTEIN HOOK HOMOLOG 1 (Q9UJC3)	MOL_ID: 1; ORGANISM_SCIENTIFIC: HOMO SAPIENS; ORGANISM_TAXID: 9606	01-JUL-21	12-OCT-21	n/a	84628.2	0.733	2.82	0.028	2.63	0.0035	7.59	0.01	49.4	0.78	123	38.8	14.89	7.18	81.2	0	81.89	1.62055
A3BXH6-F1	AF-A3BXH6-F1-model_v1	ALPHAFOLD V2.0 PREDICTION FOR OS09G0326500 PROTEIN (A3BXH6)	MOL_ID: 1; ORGANISM_SCIENTIFIC: ORYZA SATIVA SUBSP. JAPONICA; ORGANISM_TAXID: 39947	01-JUL-21	12-OCT-21	n/a	10044.7	0.727	7.04	0.071	0.796	0.0012	3.04	0.0044	30.6	0.49	49.2	18.41	2.83	2.06	76	0	64.18	1.61842
Q96HT8-F1	AF-Q96HT8-F1-model_v1	ALPHAFOLD V2.0 PREDICTION FOR MORF4 FAMILY-ASSOCIATED PROTEIN 1-LIKE 1 (Q96HT8)	MOL_ID: 1; ORGANISM_SCIENTIFIC: HOMO SAPIENS; ORGANISM_TAXID: 9606	01-JUL-21	12-OCT-21	n/a	14792.4	0.732	5.94	0.06	0.971	0.0014	3.61	0.0053	35.6	0.57	58.4	21.64	4.09	2.76	76.2	0	83.39	1.61773
Q94AX0-F1	AF-Q94AX0-F1-model_v1	ALPHAFOLD V2.0 PREDICTION FOR AT4G17010/DL4535W (Q94AX0)	MOL_ID: 1; ORGANISM_SCIENTIFIC: ARABIDOPSIS THALIANA; ORGANISM_TAXID: 3702	01-JUL-21	12-OCT-21	n/a	18688.4	0.729	5.49	0.055	1.15	0.0016	3.9	0.0056	33.7	0.54	63	21.95	4.81	3.14	83.7	0	81.54	1.61538
Q96IX9-F1	AF-Q96IX9-F1-model_v1	ALPHAFOLD V2.0 PREDICTION FOR PUTATIVE ANKYRIN REPEAT DOMAIN-CONTAINING PROTEIN 26-LIKE 1 (Q96IX9)	MOL_ID: 1; ORGANISM_SCIENTIFIC: HOMO SAPIENS; ORGANISM_TAXID: 9606	01-JUL-21	12-OCT-21	n/a	14179.2	0.74	6.72	0.068	1.02	0.0015	3.19	0.0045	24.1	0.39	51.5	18.37	3.33	2.06	98.3	0	96.01	1.61442
A4HX12-F1	AF-A4HX12-F1-model_v1	ALPHAFOLD V2.0 PREDICTION FOR HYPOTHETICAL_PROTEIN_-_CONSERVED (A4HX12)	MOL_ID: 1; ORGANISM_SCIENTIFIC: LEISHMANIA INFANTUM; ORGANISM_TAXID: 5671	01-JUL-21	12-OCT-21	n/a	29069.7	0.73	5.04	0.051	1.63	0.0022	4.25	0.0057	25.7	0.41	68.6	21.98	7.15	4.37	94.2	0	85.71	1.61412
A0A5S9MMK0-F1	AF-A0A5S9MMK0-F1-model_v1	ALPHAFOLD V2.0 PREDICTION FOR UNCHARACTERIZED PROTEIN (A0A5S9MMK0)	MOL_ID: 1; ORGANISM_SCIENTIFIC: CAENORHABDITIS ELEGANS; ORGANISM_TAXID: 6239	01-JUL-21	12-OCT-21	n/a	19597.7	0.74	5.52	0.056	1.16	0.0017	3.88	0.0055	33.2	0.53	62.6	22.15	5.55	3.66	80.5	0	83.83	1.6134
Q0GPG2-F1	AF-Q0GPG2-F1-model_v1	ALPHAFOLD V2.0 PREDICTION FOR BZIP TRANSCRIPTION FACTOR (Q0GPG2)	MOL_ID: 1; ORGANISM_SCIENTIFIC: GLYCINE MAX; ORGANISM_TAXID: 3847	01-JUL-21	12-OCT-21	n/a	18364.4	0.716	5.32	0.054	1.14	0.0016	4.03	0.0057	38.8	0.62	65	22.64	5.06	5.7	71	0	79.82	1.6129
A0A1D6JLQ5-F1	AF-A0A1D6JLQ5-F1-model_v1	ALPHAFOLD V2.0 PREDICTION FOR THO COMPLEX SUBUNIT 7B-LIKE1 (A0A1D6JLQ5)	MOL_ID: 1; ORGANISM_SCIENTIFIC: ZEA MAYS; ORGANISM_TAXID: 4577	01-JUL-21	12-OCT-21	n/a	27584.9	0.742	4.7	0.047	1.38	0.0019	4.56	0.0063	34.3	0.55	73.5	25.27	6.42	4.46	75.1	0	81.96	1.61184
Q96NL6-F1	AF-Q96NL6-F1-model_v1	ALPHAFOLD V2.0 PREDICTION FOR SODIUM CHANNEL AND CLATHRIN LINKER 1 (Q96NL6)	MOL_ID: 1; ORGANISM_SCIENTIFIC: HOMO SAPIENS; ORGANISM_TAXID: 9606	01-JUL-21	12-OCT-21	n/a	80914	0.733	2.78	0.028	2.48	0.0035	7.7	0.011	58.6	0.94	124	43.94	9.5	5.35	90.8	0	82.24	1.61039
A0A1P8ASY7-F1	AF-A0A1P8ASY7-F1-model_v1	ALPHAFOLD V2.0 PREDICTION FOR MYOSIN HEAVY CHAIN-LIKE PROTEIN (A0A1P8ASY7)	MOL_ID: 1; ORGANISM_SCIENTIFIC: ARABIDOPSIS THALIANA; ORGANISM_TAXID: 3702	01-JUL-21	12-OCT-21	n/a	72410.5	0.737	2.76	0.028	2.17	0.0031	7.77	0.011	67.3	1.09	125	44.96	10.17	6.97	89.9	0	81.98	1.60875
H0YKK7-F1	AF-H0YKK7-F1-model_v1	ALPHAFOLD V2.0 PREDICTION FOR PUTATIVE GOLGIN SUBFAMILY A MEMBER 6-LIKE PROTEIN 19 (H0YKK7)	MOL_ID: 1; ORGANISM_SCIENTIFIC: HOMO SAPIENS; ORGANISM_TAXID: 9606	01-JUL-21	12-OCT-21	n/a	64454.5	0.719	2.85	0.029	2.12	0.003	7.53	0.011	65.6	1.05	121	41.74	11.66	9.14	64.5	0	73.22	1.60691
C0P5X2-F1	AF-C0P5X2-F1-model_v1	ALPHAFOLD V2.0 PREDICTION FOR UNCHARACTERIZED PROTEIN (C0P5X2)	MOL_ID: 1; ORGANISM_SCIENTIFIC: ZEA MAYS; ORGANISM_TAXID: 4577	01-JUL-21	12-OCT-21	n/a	47400.8	0.727	3.18	0.032	1.7	0.0024	6.73	0.0097	65	1.05	108	40.16	9.85	8.2	61.3	0	73.59	1.60475
A0A0P0WRC6-F1	AF-A0A0P0WRC6-F1-model_v1	ALPHAFOLD V2.0 PREDICTION FOR OS05G0573400 PROTEIN (A0A0P0WRC6)	MOL_ID: 1; ORGANISM_SCIENTIFIC: ORYZA SATIVA SUBSP. JAPONICA; ORGANISM_TAXID: 39947	01-JUL-21	12-OCT-21	n/a	13613.8	0.743	6.9	0.07	0.995	0.0014	3.11	0.0044	23.8	0.38	49.9	17.52	3.65	2.67	88.4	0	71.65	1.6045
Q86T23-F1	AF-Q86T23-F1-model_v1	ALPHAFOLD V2.0 PREDICTION FOR PUTATIVE CILIARY ROOTLET COILED-COIL PROTEIN-LIKE 1 PROTEIN (Q86T23)	MOL_ID: 1; ORGANISM_SCIENTIFIC: HOMO SAPIENS; ORGANISM_TAXID: 9606	01-JUL-21	12-OCT-21	n/a	12386.7	0.736	7.19	0.073	0.969	0.0014	2.98	0.0043	21.9	0.35	47.8	16.99	2.35	2.53	98.2	0	96.31	1.60403
L7S1A0-F1	AF-L7S1A0-F1-model_v1	ALPHAFOLD V2.0 PREDICTION FOR FI20862P1 (L7S1A0)	MOL_ID: 1; ORGANISM_SCIENTIFIC: DROSOPHILA MELANOGASTER; ORGANISM_TAXID: 7227	01-JUL-21	12-OCT-21	n/a	17358.2	0.739	5.93	0.06	1.11	0.0016	3.61	0.0051	28.3	0.45	57.9	19.76	5.15	3.47	70	0	78.74	1.60388
Q4E4A4-F1	AF-Q4E4A4-F1-model_v1	ALPHAFOLD V2.0 PREDICTION FOR UNCHARACTERIZED PROTEIN (Q4E4A4)	MOL_ID: 1; ORGANISM_SCIENTIFIC: TRYPANOSOMA CRUZI (STRAIN CL BRENER); ORGANISM_TAXID: 353153	01-JUL-21	12-OCT-21	n/a	23508.8	0.731	4.8	0.048	1.25	0.0018	4.46	0.0063	38.8	0.62	71.5	24.87	6	5.43	75.9	0	79.93	1.60314
B1AT01-F1	AF-B1AT01-F1-model_v1	ALPHAFOLD V2.0 PREDICTION FOR RIKEN CDNA 1700084M14 GENE (B1AT01)	MOL_ID: 1; ORGANISM_SCIENTIFIC: MUS MUSCULUS; ORGANISM_TAXID: 10090	01-JUL-21	12-OCT-21	n/a	8869.7	0.75	6.35	0.064	0.581	0.00081	3.37	0.0047	45.1	0.73	54	18.4	7.36	3.42	0	0	70.67	1.60237
Q9P7J4-F1	AF-Q9P7J4-F1-model_v1	ALPHAFOLD V2.0 PREDICTION FOR THO COMPLEX SUBUNIT MFT1 (Q9P7J4)	MOL_ID: 1; ORGANISM_SCIENTIFIC: SCHIZOSACCHAROMYCES POMBE (STRAIN 972 / ATCC 24843); ORGANISM_TAXID: 284812	01-JUL-21	12-OCT-21	n/a	23272.8	0.729	5.27	0.053	1.37	0.0019	4.06	0.0055	28.3	0.45	65	21.9	4.88	3.57	75.6	0	82.8	1.60099
Q54RY7-F1	AF-Q54RY7-F1-model_v1	ALPHAFOLD V2.0 PREDICTION FOR UNCHARACTERIZED PROTEIN (Q54RY7)	MOL_ID: 1; ORGANISM_SCIENTIFIC: DICTYOSTELIUM DISCOIDEUM; ORGANISM_TAXID: 44689	01-JUL-21	12-OCT-21	1-23	30935.4	0.698	5.16	0.052	1.98	0.0028	4.16	0.0059	24.1	0.39	66.5	23.34	4.31	3.62	1.4	29.9	92.2	1.59856
Q8SWS3-F1	AF-Q8SWS3-F1-model_v1	ALPHAFOLD V2.0 PREDICTION FOR RE26528P (Q8SWS3)	MOL_ID: 1; ORGANISM_SCIENTIFIC: DROSOPHILA MELANOGASTER; ORGANISM_TAXID: 7227	01-JUL-21	12-OCT-21	1-17	15627.6	0.767	5.47	0.055	0.822	0.0011	3.92	0.0052	36.1	0.57	62.6	20.7	5.72	4.67	6.8	0	59.63	1.59694
Q54CI6-F1	AF-Q54CI6-F1-model_v1	ALPHAFOLD V2.0 PREDICTION FOR BLOC-1-RELATED COMPLEX SUBUNIT 7 (Q54CI6)	MOL_ID: 1; ORGANISM_SCIENTIFIC: DICTYOSTELIUM DISCOIDEUM; ORGANISM_TAXID: 44689	01-JUL-21	12-OCT-21	n/a	13751.8	0.739	6.36	0.064	0.941	0.0014	3.37	0.0049	30.3	0.49	53.8	19.97	4.01	2.57	80.3	0	87.66	1.59644
A0A1P8AVM6-F1	AF-A0A1P8AVM6-F1-model_v1	ALPHAFOLD V2.0 PREDICTION FOR TRANSMEMBRANE PROTEIN (A0A1P8AVM6)	MOL_ID: 1; ORGANISM_SCIENTIFIC: ARABIDOPSIS THALIANA; ORGANISM_TAXID: 3702	01-JUL-21	12-OCT-21	n/a	17789.7	0.742	6.19	0.063	1.17	0.0016	3.46	0.0048	23.4	0.37	55.2	18.33	4.67	3.12	74.5	7.8	90.61	1.59538
A2BI50-F1	AF-A2BI50-F1-model_v1	ALPHAFOLD V2.0 PREDICTION FOR X-LINKED LYMPHOCYTE-REGULATED 5B (A2BI50)	MOL_ID: 1; ORGANISM_SCIENTIFIC: MUS MUSCULUS; ORGANISM_TAXID: 10090	01-JUL-21	12-OCT-21	n/a	27194.9	0.724	4.62	0.047	1.43	0.002	4.64	0.0065	36.7	0.59	73.8	26.26	5.69	3.58	75.3	0	80.76	1.59052
Q54FS8-F1	AF-Q54FS8-F1-model_v1	ALPHAFOLD V2.0 PREDICTION FOR UNCHARACTERIZED PROTEIN (Q54FS8)	MOL_ID: 1; ORGANISM_SCIENTIFIC: DICTYOSTELIUM DISCOIDEUM; ORGANISM_TAXID: 44689	01-JUL-21	12-OCT-21	n/a	26114	0.736	5.53	0.056	1.57	0.0021	3.88	0.0051	21.5	0.34	61.7	18.86	4.61	4.19	67.3	1.8	76.9	1.59021
Q8C3X2-F1	AF-Q8C3X2-F1-model_v1	ALPHAFOLD V2.0 PREDICTION FOR COILED-COIL DOMAIN-CONTAINING PROTEIN 90B, MITOCHONDRIAL (Q8C3X2)	MOL_ID: 1; ORGANISM_SCIENTIFIC: MUS MUSCULUS; ORGANISM_TAXID: 10090	01-JUL-21	12-OCT-21	n/a	29604.2	0.737	4.49	0.045	1.44	0.002	4.77	0.0068	36.5	0.59	75.8	27.03	6.75	5.53	72.5	0	82.19	1.5891
O75054-F1	AF-O75054-F1-model_v1	ALPHAFOLD V2.0 PREDICTION FOR IMMUNOGLOBULIN SUPERFAMILY MEMBER 3 (O75054)	MOL_ID: 1; ORGANISM_SCIENTIFIC: HOMO SAPIENS; ORGANISM_TAXID: 9606	01-JUL-21	12-OCT-21	1-19	133216	0.729	2.81	0.028	4.18	0.0062	7.63	0.011	36.4	0.59	121	44.79	8.69	7.43	6.8	39.7	82.07	1.58585
A8MRV2-F1	AF-A8MRV2-F1-model_v1	ALPHAFOLD V2.0 PREDICTION FOR UNCHARACTERIZED PROTEIN (A8MRV2)	MOL_ID: 1; ORGANISM_SCIENTIFIC: ARABIDOPSIS THALIANA; ORGANISM_TAXID: 3702	01-JUL-21	12-OCT-21	n/a	6052.6	0.716	8.08	0.082	0.573	0.00081	2.65	0.0038	31.7	0.51	42	15.2	2.77	2.5	3.6	0	61.94	1.58491
Q8TA52-F1	AF-Q8TA52-F1-model_v1	ALPHAFOLD V2.0 PREDICTION FOR INTRAFLAGELLAR TRANSPORT PROTEIN 20 HOMOLOG (Q8TA52)	MOL_ID: 1; ORGANISM_SCIENTIFIC: CAENORHABDITIS ELEGANS; ORGANISM_TAXID: 6239	01-JUL-21	12-OCT-21	n/a	14918.1	0.732	6.71	0.068	1.11	0.0015	3.2	0.0044	21.7	0.34	50.7	17.14	4.82	3.21	83.6	0	90.62	1.58438
A0A0G2K8M4-F1	AF-A0A0G2K8M4-F1-model_v1	ALPHAFOLD V2.0 PREDICTION FOR TAKUSAN DOMAIN-CONTAINING PROTEIN (A0A0G2K8M4)	MOL_ID: 1; ORGANISM_SCIENTIFIC: RATTUS NORVEGICUS; ORGANISM_TAXID: 10116	01-JUL-21	12-OCT-21	n/a	27384.2	0.735	4.6	0.046	1.38	0.002	4.66	0.0067	39.2	0.63	73.8	27.36	6.77	4.26	74.8	0	73.53	1.58369
Q9BZW7-F1	AF-Q9BZW7-F1-model_v1	ALPHAFOLD V2.0 PREDICTION FOR TESTIS-SPECIFIC GENE 10 PROTEIN (Q9BZW7)	MOL_ID: 1; ORGANISM_SCIENTIFIC: HOMO SAPIENS; ORGANISM_TAXID: 9606	01-JUL-21	12-OCT-21	n/a	81421.9	0.727	2.78	0.028	2.55	0.0036	7.71	0.011	59.5	0.95	122	45.24	7.16	7.19	85.9	0	81.18	1.58236
O94470-F1	AF-O94470-F1-model_v1	ALPHAFOLD V2.0 PREDICTION FOR UNCHARACTERIZED PROTEIN C23G7.14 (O94470)	MOL_ID: 1; ORGANISM_SCIENTIFIC: SCHIZOSACCHAROMYCES POMBE (STRAIN 972 / ATCC 24843); ORGANISM_TAXID: 284812	01-JUL-21	12-OCT-21	n/a	15789.2	0.737	6.64	0.067	1.14	0.0016	3.23	0.0045	21.6	0.34	51.1	17.68	3.83	2.76	91.5	0	92.61	1.58204
Q6ZBW9-F1	AF-Q6ZBW9-F1-model_v1	ALPHAFOLD V2.0 PREDICTION FOR OS08G0563300 PROTEIN (Q6ZBW9)	MOL_ID: 1; ORGANISM_SCIENTIFIC: ORYZA SATIVA SUBSP. JAPONICA; ORGANISM_TAXID: 39947	01-JUL-21	12-OCT-21	n/a	13983.3	0.722	6.63	0.067	1.06	0.0015	3.23	0.0045	25	0.4	51.1	18.02	4.04	3.1	95.8	0	86.43	1.58204
Q9CQU5-F1	AF-Q9CQU5-F1-model_v1	ALPHAFOLD V2.0 PREDICTION FOR ZW10 INTERACTOR (Q9CQU5)	MOL_ID: 1; ORGANISM_SCIENTIFIC: MUS MUSCULUS; ORGANISM_TAXID: 10090	01-JUL-21	12-OCT-21	n/a	28721	0.739	4.72	0.048	1.46	0.0021	4.54	0.0066	34.4	0.56	71.8	27.36	5.36	3.62	90.8	0	82.71	1.5815
Q569K6-F1	AF-Q569K6-F1-model_v1	ALPHAFOLD V2.0 PREDICTION FOR COILED-COIL DOMAIN-CONTAINING PROTEIN 157 (Q569K6)	MOL_ID: 1; ORGANISM_SCIENTIFIC: HOMO SAPIENS; ORGANISM_TAXID: 9606	01-JUL-21	12-OCT-21	n/a	83955.4	0.729	2.55	0.026	2.39	0.0033	8.41	0.012	67.7	1.08	133	44.48	9.95	11.26	60	0	71.77	1.58145
A0A0P0XC01-F1	AF-A0A0P0XC01-F1-model_v1	ALPHAFOLD V2.0 PREDICTION FOR OS08G0140925 PROTEIN (A0A0P0XC01)	MOL_ID: 1; ORGANISM_SCIENTIFIC: ORYZA SATIVA SUBSP. JAPONICA; ORGANISM_TAXID: 39947	01-JUL-21	12-OCT-21	n/a	7888.9	0.696	7.04	0.071	0.696	0.00094	3.04	0.0041	35.1	0.56	48	14.73	6.23	4.09	0	0	59.6	1.57895
P49300-F1	AF-P49300-F1-model_v1	ALPHAFOLD V2.0 PREDICTION FOR C-TYPE LECTIN DOMAIN FAMILY 10 MEMBER A (P49300)	MOL_ID: 1; ORGANISM_SCIENTIFIC: MUS MUSCULUS; ORGANISM_TAXID: 10090	01-JUL-21	12-OCT-21	n/a	34584.7	0.729	4.68	0.047	1.81	0.0025	4.58	0.0064	28.6	0.46	72.3	24.48	6.46	4.32	52.8	5.3	88.58	1.5786
A0A0P0XTG5-F1	AF-A0A0P0XTG5-F1-model_v1	ALPHAFOLD V2.0 PREDICTION FOR OS10G0315400 PROTEIN (A0A0P0XTG5)	MOL_ID: 1; ORGANISM_SCIENTIFIC: ORYZA SATIVA SUBSP. JAPONICA; ORGANISM_TAXID: 39947	01-JUL-21	12-OCT-21	n/a	31622.8	0.732	4.05	0.041	1.42	0.0021	5.29	0.0077	47.9	0.77	83.5	31.32	6.24	5.24	69.4	0	78.39	1.57845
Q54HI5-F1	AF-Q54HI5-F1-model_v1	ALPHAFOLD V2.0 PREDICTION FOR LAMIN-LIKE PROTEIN (Q54HI5)	MOL_ID: 1; ORGANISM_SCIENTIFIC: DICTYOSTELIUM DISCOIDEUM; ORGANISM_TAXID: 44689	01-JUL-21	12-OCT-21	n/a	81352.3	0.729	2.54	0.026	2.31	0.0034	8.43	0.012	78.4	1.27	133	51.68	8.25	8.79	51.2	6	73.2	1.5777
O75935-F1	AF-O75935-F1-model_v1	ALPHAFOLD V2.0 PREDICTION FOR DYNACTIN SUBUNIT 3 (O75935)	MOL_ID: 1; ORGANISM_SCIENTIFIC: HOMO SAPIENS; ORGANISM_TAXID: 9606	01-JUL-21	12-OCT-21	n/a	21118.3	0.749	5.47	0.055	1.2	0.0017	3.92	0.0055	29.2	0.47	61.8	21.83	5.97	3.56	83.2	0	89.53	1.57653
Q0MQ65-F1	AF-Q0MQ65-F1-model_v1	ALPHAFOLD V2.0 PREDICTION FOR UNCHARACTERIZED PROTEIN (Q0MQ65)	MOL_ID: 1; ORGANISM_SCIENTIFIC: CAENORHABDITIS ELEGANS; ORGANISM_TAXID: 6239	01-JUL-21	12-OCT-21	n/a	11885.5	0.77	7.52	0.076	0.849	0.0012	2.85	0.004	20.1	0.32	44.9	16.26	2.79	2.13	96.1	0	86.47	1.57544
Q8BNX1-F1	AF-Q8BNX1-F1-model_v1	ALPHAFOLD V2.0 PREDICTION FOR C-TYPE LECTIN DOMAIN FAMILY 4 MEMBER G (Q8BNX1)	MOL_ID: 1; ORGANISM_SCIENTIFIC: MUS MUSCULUS; ORGANISM_TAXID: 10090	01-JUL-21	12-OCT-21	n/a	33326.2	0.727	4.87	0.049	1.83	0.0026	4.4	0.0062	26.6	0.43	69.2	24.46	6.51	3.85	59	9.2	90.82	1.57273
A0A1D6J7I8-F1	AF-A0A1D6J7I8-F1-model_v1	ALPHAFOLD V2.0 PREDICTION FOR UNCHARACTERIZED PROTEIN (A0A1D6J7I8)	MOL_ID: 1; ORGANISM_SCIENTIFIC: ZEA MAYS; ORGANISM_TAXID: 4577	01-JUL-21	12-OCT-21	n/a	12070.3	0.726	7.24	0.073	0.988	0.0014	2.96	0.0042	22	0.35	46.5	16.73	2.92	2.62	90.7	0	89.65	1.57095
Q9JJ94-F1	AF-Q9JJ94-F1-model_v1	ALPHAFOLD V2.0 PREDICTION FOR SJOEGREN SYNDROME NUCLEAR AUTOANTIGEN 1 HOMOLOG (Q9JJ94)	MOL_ID: 1; ORGANISM_SCIENTIFIC: MUS MUSCULUS; ORGANISM_TAXID: 10090	01-JUL-21	12-OCT-21	n/a	13558.1	0.726	6.7	0.068	1.03	0.0015	3.2	0.0046	25.8	0.41	50.2	18.65	3.46	2.65	94.9	0	93.68	1.56875
Q4CRB3-F1	AF-Q4CRB3-F1-model_v1	ALPHAFOLD V2.0 PREDICTION FOR PARAFLAGELLAR ROD COMPONENT PAR4, PUTATIVE (Q4CRB3)	MOL_ID: 1; ORGANISM_SCIENTIFIC: TRYPANOSOMA CRUZI (STRAIN CL BRENER); ORGANISM_TAXID: 353153	01-JUL-21	12-OCT-21	n/a	14008.7	0.74	6.95	0.07	1.04	0.0014	3.08	0.0041	20.4	0.32	48.3	15.81	4.27	3.02	89.1	0	91.66	1.56818
A0A1D6N3D4-F1	AF-A0A1D6N3D4-F1-model_v1	ALPHAFOLD V2.0 PREDICTION FOR SH3 DOMAIN-CONTAINING PROTEIN 2 (A0A1D6N3D4)	MOL_ID: 1; ORGANISM_SCIENTIFIC: ZEA MAYS; ORGANISM_TAXID: 4577	01-JUL-21	12-OCT-21	n/a	12530.5	0.725	7.02	0.071	0.997	0.0014	3.05	0.0043	24	0.38	47.8	17.48	3.56	2.52	84.8	0	86.59	1.56721
Q4DGN4-F1	AF-Q4DGN4-F1-model_v1	ALPHAFOLD V2.0 PREDICTION FOR DNAJ CHAPERONE PROTEIN, PUTATIVE (Q4DGN4)	MOL_ID: 1; ORGANISM_SCIENTIFIC: TRYPANOSOMA CRUZI (STRAIN CL BRENER); ORGANISM_TAXID: 353153	01-JUL-21	12-OCT-21	n/a	25793.5	0.727	5.16	0.052	1.5	0.002	4.15	0.0054	25.9	0.41	65	20.85	6.46	4.59	67.4	0	80.91	1.56627
A0A0P0WRK3-F1	AF-A0A0P0WRK3-F1-model_v1	ALPHAFOLD V2.0 PREDICTION FOR OS05G0587900 PROTEIN (A0A0P0WRK3)	MOL_ID: 1; ORGANISM_SCIENTIFIC: ORYZA SATIVA SUBSP. JAPONICA; ORGANISM_TAXID: 39947	01-JUL-21	12-OCT-21	n/a	14811.2	0.731	6.12	0.062	1.01	0.0015	3.5	0.0051	31.5	0.51	54.8	20.82	3.52	3.48	82.7	0	76.71	1.56571
O95295-F1	AF-O95295-F1-model_v1	ALPHAFOLD V2.0 PREDICTION FOR SNARE-ASSOCIATED PROTEIN SNAPIN (O95295)	MOL_ID: 1; ORGANISM_SCIENTIFIC: HOMO SAPIENS; ORGANISM_TAXID: 9606	01-JUL-21	12-OCT-21	n/a	14880	0.736	5.88	0.059	0.952	0.0014	3.65	0.0054	35.9	0.59	57.1	22.12	6.01	3.24	72.6	0	85.3	1.56438
O43805-F1	AF-O43805-F1-model_v1	ALPHAFOLD V2.0 PREDICTION FOR SJOEGREN SYNDROME NUCLEAR AUTOANTIGEN 1 (O43805)	MOL_ID: 1; ORGANISM_SCIENTIFIC: HOMO SAPIENS; ORGANISM_TAXID: 9606	01-JUL-21	12-OCT-21	n/a	13596.2	0.726	6.56	0.066	1.01	0.0015	3.26	0.0047	27.7	0.45	50.9	19.01	4.05	2.6	88.1	0	93.11	1.56135
Q8MYW2-F1	AF-Q8MYW2-F1-model_v1	ALPHAFOLD V2.0 PREDICTION FOR RH02374P (Q8MYW2)	MOL_ID: 1; ORGANISM_SCIENTIFIC: DROSOPHILA MELANOGASTER; ORGANISM_TAXID: 7227	01-JUL-21	12-OCT-21	n/a	14501.5	0.725	6.1	0.062	1	0.0015	3.51	0.0053	33.6	0.54	54.8	21.78	3.78	2.57	84.9	0	85.59	1.56125
A0A0R0FL39-F1	AF-A0A0R0FL39-F1-model_v1	ALPHAFOLD V2.0 PREDICTION FOR UNCHARACTERIZED PROTEIN (A0A0R0FL39)	MOL_ID: 1; ORGANISM_SCIENTIFIC: GLYCINE MAX; ORGANISM_TAXID: 3847	01-JUL-21	12-OCT-21	n/a	38739.8	0.729	3.78	0.038	1.63	0.0023	5.67	0.0079	46.6	0.74	88.5	30.98	8.45	7.5	67	0	78.13	1.56085
Q2FWG6-F1	AF-Q2FWG6-F1-model_v1	ALPHAFOLD V2.0 PREDICTION FOR UNCHARACTERIZED PROTEIN (Q2FWG6)	MOL_ID: 1; ORGANISM_SCIENTIFIC: STAPHYLOCOCCUS AUREUS (STRAIN NCTC 8325 / PS 47); ORGANISM_TAXID: 93061	01-JUL-21	12-OCT-21	n/a	3873.1	0.702	10.8	0.11	0.515	0.00072	1.98	0.0027	20.1	0.32	30.9	10.82	2.15	1.62	0	0	76.27	1.56061
A0A0P0XW25-F1	AF-A0A0P0XW25-F1-model_v1	ALPHAFOLD V2.0 PREDICTION FOR OS10G0509401 PROTEIN (A0A0P0XW25)	MOL_ID: 1; ORGANISM_SCIENTIFIC: ORYZA SATIVA SUBSP. JAPONICA; ORGANISM_TAXID: 39947	01-JUL-21	12-OCT-21	n/a	11997.2	0.728	7.15	0.072	0.962	0.0014	3	0.0042	23	0.37	46.8	16.98	3.88	2.6	96.4	0	93.88	1.56
A0A1D6G4S7-F1	AF-A0A1D6G4S7-F1-model_v1	ALPHAFOLD V2.0 PREDICTION FOR CALMODULIN-BINDING TRANSCRIPTION ACTIVATOR 2 (A0A1D6G4S7)	MOL_ID: 1; ORGANISM_SCIENTIFIC: ZEA MAYS; ORGANISM_TAXID: 4577	01-JUL-21	12-OCT-21	n/a	13581.3	0.735	6.55	0.066	0.971	0.0014	3.27	0.0046	26.6	0.43	51	18.49	5.07	2.67	81.9	0	83.47	1.55963
Q9NYM9-F1	AF-Q9NYM9-F1-model_v1	ALPHAFOLD V2.0 PREDICTION FOR BET1-LIKE PROTEIN (Q9NYM9)	MOL_ID: 1; ORGANISM_SCIENTIFIC: HOMO SAPIENS; ORGANISM_TAXID: 9606	01-JUL-21	12-OCT-21	n/a	12390.9	0.73	7.09	0.072	0.978	0.0014	3.02	0.0042	22.4	0.36	47.1	16.6	4.28	3.01	92.7	0	88.52	1.5596
Q55FQ4-F1	AF-Q55FQ4-F1-model_v1	ALPHAFOLD V2.0 PREDICTION FOR PROTEIN PSIB (Q55FQ4)	MOL_ID: 1; ORGANISM_SCIENTIFIC: DICTYOSTELIUM DISCOIDEUM; ORGANISM_TAXID: 44689	01-JUL-21	12-OCT-21	1-18	57617.4	0.716	4.5	0.045	3.03	0.0042	4.77	0.0066	19	0.3	74.3	25.04	5.87	5.66	6.9	26.8	90.07	1.55765
A0A1B0GVG4-F1	AF-A0A1B0GVG4-F1-model_v1	ALPHAFOLD V2.0 PREDICTION FOR COILED-COIL DOMAIN-CONTAINING PROTEIN 194 (A0A1B0GVG4)	MOL_ID: 1; ORGANISM_SCIENTIFIC: HOMO SAPIENS; ORGANISM_TAXID: 9606	01-JUL-21	12-OCT-21	1-42	20905.9	0.716	5.04	0.051	1.23	0.0017	4.25	0.0058	36.2	0.58	66.2	22.02	6.16	3.99	68.1	0	81.78	1.55765
F1QRF8-F1	AF-F1QRF8-F1-model_v1	ALPHAFOLD V2.0 PREDICTION FOR ATPASE FAMILY AAA DOMAIN-CONTAINING 3 (F1QRF8)	MOL_ID: 1; ORGANISM_SCIENTIFIC: DANIO RERIO; ORGANISM_TAXID: 7955	01-JUL-21	12-OCT-21	n/a	25542	0.722	4.77	0.048	1.4	0.002	4.49	0.0064	34.6	0.56	69.9	24.77	6.12	6.41	76.8	0	85.69	1.55679
Q96B45-F1	AF-Q96B45-F1-model_v1	ALPHAFOLD V2.0 PREDICTION FOR BLOC-1-RELATED COMPLEX SUBUNIT 7 (Q96B45)	MOL_ID: 1; ORGANISM_SCIENTIFIC: HOMO SAPIENS; ORGANISM_TAXID: 9606	01-JUL-21	12-OCT-21	n/a	11696.8	0.736	7.36	0.074	0.937	0.0013	2.91	0.004	21.2	0.34	45.2	15.24	4.8	2.48	89.5	0	94.46	1.55326
Q4CSX9-F1	AF-Q4CSX9-F1-model_v1	ALPHAFOLD V2.0 PREDICTION FOR L51_S25_CI-B8 DOMAIN-CONTAINING PROTEIN (Q4CSX9)	MOL_ID: 1; ORGANISM_SCIENTIFIC: TRYPANOSOMA CRUZI (STRAIN CL BRENER); ORGANISM_TAXID: 353153	01-JUL-21	12-OCT-21	n/a	26875	0.723	5.57	0.056	1.71	0.0022	3.85	0.005	19.2	0.3	59.8	17.98	6.39	4.49	40.3	9.5	92.89	1.55325
Q4D0K8-F1	AF-Q4D0K8-F1-model_v1	ALPHAFOLD V2.0 PREDICTION FOR KINESIN-LIKE PROTEIN (Q4D0K8)	MOL_ID: 1; ORGANISM_SCIENTIFIC: TRYPANOSOMA CRUZI (STRAIN CL BRENER); ORGANISM_TAXID: 353153	01-JUL-21	12-OCT-21	n/a	72064.6	0.729	3.75	0.038	3.02	0.0041	5.72	0.0078	25.9	0.41	88.8	30.4	9.51	7.21	60.8	9.4	79.91	1.55245
Q8LG30-F1	AF-Q8LG30-F1-model_v1	ALPHAFOLD V2.0 PREDICTION FOR ADHESIVE/PROLINE-RICH-LIKE PROTEIN (Q8LG30)	MOL_ID: 1; ORGANISM_SCIENTIFIC: ARABIDOPSIS THALIANA; ORGANISM_TAXID: 3702	01-JUL-21	12-OCT-21	n/a	8119.3	0.736	8.22	0.083	0.726	0.00095	2.61	0.0034	20.4	0.32	40.5	12.11	5.37	2.25	22.7	0	64.87	1.55172
O96002-F1	AF-O96002-F1-model_v1	ALPHAFOLD V2.0 PREDICTION FOR PUTATIVE TRANSMEMBRANE PROTEIN CXORF1 (O96002)	MOL_ID: 1; ORGANISM_SCIENTIFIC: HOMO SAPIENS; ORGANISM_TAXID: 9606	01-JUL-21	12-OCT-21	n/a	13461.7	0.753	7.11	0.072	0.976	0.0013	3.01	0.0041	20.4	0.33	46.7	15.6	3.91	2.95	77.3	5.5	79.68	1.5515
Q966K7-F1	AF-Q966K7-F1-model_v1	ALPHAFOLD V2.0 PREDICTION FOR UNCHARACTERIZED PROTEIN (Q966K7)	MOL_ID: 1; ORGANISM_SCIENTIFIC: CAENORHABDITIS ELEGANS; ORGANISM_TAXID: 6239	01-JUL-21	12-OCT-21	1-16	24759.7	0.698	5.34	0.054	1.65	0.0023	4.01	0.0055	26.3	0.42	62.2	20.9	4.64	4.93	1.2	12.5	73.31	1.55112
Q96ST8-F1	AF-Q96ST8-F1-model_v1	ALPHAFOLD V2.0 PREDICTION FOR CENTROSOMAL PROTEIN OF 89 KDA (Q96ST8)	MOL_ID: 1; ORGANISM_SCIENTIFIC: HOMO SAPIENS; ORGANISM_TAXID: 9606	01-JUL-21	12-OCT-21	n/a	89601.6	0.735	2.37	0.024	2.32	0.0032	9.03	0.012	79.4	1.27	140	47.56	15.54	10.89	62	0	68.72	1.55039
P29534-F1	AF-P29534-F1-model_v1	ALPHAFOLD V2.0 PREDICTION FOR VASCULAR CELL ADHESION PROTEIN 1 (P29534)	MOL_ID: 1; ORGANISM_SCIENTIFIC: RATTUS NORVEGICUS; ORGANISM_TAXID: 10116	01-JUL-21	12-OCT-21	1-24	78659.2	0.74	3.57	0.036	3.01	0.0043	6	0.0085	28.9	0.46	93	33.68	7.42	5.63	4.5	41.3	85.47	1.55
F1LY47-F1	AF-F1LY47-F1-model_v1	ALPHAFOLD V2.0 PREDICTION FOR HYPOTHETICAL LOC501317 (F1LY47)	MOL_ID: 1; ORGANISM_SCIENTIFIC: RATTUS NORVEGICUS; ORGANISM_TAXID: 10116	01-JUL-21	12-OCT-21	n/a	19125.3	0.733	5.69	0.057	1.2	0.0017	3.77	0.0054	29.2	0.47	58.4	21.57	4.52	3.92	79.1	0	82.67	1.54907
Q8N137-F1	AF-Q8N137-F1-model_v1	ALPHAFOLD V2.0 PREDICTION FOR CENTROBIN (Q8N137)	MOL_ID: 1; ORGANISM_SCIENTIFIC: HOMO SAPIENS; ORGANISM_TAXID: 9606	01-JUL-21	12-OCT-21	n/a	101244	0.725	2.1	0.021	2.42	0.0034	10.2	0.015	102	1.64	158	59.65	13.84	9.6	55.8	0	66.22	1.54902
Q4CKC2-F1	AF-Q4CKC2-F1-model_v1	ALPHAFOLD V2.0 PREDICTION FOR UNCHARACTERIZED PROTEIN (Q4CKC2)	MOL_ID: 1; ORGANISM_SCIENTIFIC: TRYPANOSOMA CRUZI (STRAIN CL BRENER); ORGANISM_TAXID: 353153	01-JUL-21	12-OCT-21	n/a	43866.2	0.725	4	0.04	1.99	0.0029	5.36	0.0078	37.7	0.61	83	32.28	5.27	3.8	95.4	0	90.09	1.54851
O82628-F1	AF-O82628-F1-model_v1	ALPHAFOLD V2.0 PREDICTION FOR V-TYPE PROTON ATPASE SUBUNIT G1 (O82628)	MOL_ID: 1; ORGANISM_SCIENTIFIC: ARABIDOPSIS THALIANA; ORGANISM_TAXID: 3702	01-JUL-21	12-OCT-21	n/a	12397.3	0.73	7.06	0.071	0.975	0.0014	3.03	0.0043	23.4	0.37	46.9	17.22	3.01	2.32	96.3	0	89.59	1.54785
B0BNK9-F1	AF-B0BNK9-F1-model_v1	ALPHAFOLD V2.0 PREDICTION FOR EF-HAND CALCIUM-BINDING DOMAIN-CONTAINING PROTEIN 4A (B0BNK9)	MOL_ID: 1; ORGANISM_SCIENTIFIC: RATTUS NORVEGICUS; ORGANISM_TAXID: 10116	01-JUL-21	12-OCT-21	n/a	44545.4	0.726	3.75	0.038	1.89	0.0025	5.72	0.0076	40.4	0.64	88.5	30.19	8.7	6.37	67.1	1	77.99	1.5472
Q4DE39-F1	AF-Q4DE39-F1-model_v1	ALPHAFOLD V2.0 PREDICTION FOR UNCHARACTERIZED PROTEIN (Q4DE39)	MOL_ID: 1; ORGANISM_SCIENTIFIC: TRYPANOSOMA CRUZI (STRAIN CL BRENER); ORGANISM_TAXID: 353153	01-JUL-21	12-OCT-21	n/a	13197.6	0.737	6.95	0.07	0.995	0.0014	3.08	0.0044	22.9	0.37	47.6	17.6	2.76	2.28	96.4	0	91.59	1.54545
A2CG29-F1	AF-A2CG29-F1-model_v1	ALPHAFOLD V2.0 PREDICTION FOR BUTYROPHILIN, SUBFAMILY 3, MEMBER A3 (A2CG29)	MOL_ID: 1; ORGANISM_SCIENTIFIC: MUS MUSCULUS; ORGANISM_TAXID: 10090	01-JUL-21	12-OCT-21	1-28	62604.3	0.732	3.88	0.039	2.68	0.0034	5.52	0.007	22.4	0.35	85.3	25.66	8.63	8.61	16.7	29.1	80.84	1.54529
P0DKG4-F1	AF-P0DKG4-F1-model_v1	ALPHAFOLD V2.0 PREDICTION FOR MATH DOMAIN AND COILED-COIL DOMAIN-CONTAINING PROTEIN AT2G42465 (P0DKG4)	MOL_ID: 1; ORGANISM_SCIENTIFIC: ARABIDOPSIS THALIANA; ORGANISM_TAXID: 3702	01-JUL-21	12-OCT-21	n/a	47198	0.741	4.18	0.042	2.11	0.0029	5.12	0.0071	29.4	0.47	79.1	26.84	8.08	5.47	50.7	13.5	79.37	1.54492
A0A1D6EHC0-F1	AF-A0A1D6EHC0-F1-model_v1	ALPHAFOLD V2.0 PREDICTION FOR T-COMPLEX PROTEIN 11 (A0A1D6EHC0)	MOL_ID: 1; ORGANISM_SCIENTIFIC: ZEA MAYS; ORGANISM_TAXID: 4577	01-JUL-21	12-OCT-21	n/a	12175.2	0.736	7.38	0.075	0.979	0.0014	2.9	0.0041	20	0.32	44.8	15.91	3.05	2.19	97	0	93.47	1.54483
P35727-F1	AF-P35727-F1-model_v1	ALPHAFOLD V2.0 PREDICTION FOR BIOGENESIS OF LYSOSOME-RELATED ORGANELLES COMPLEX 1 SUBUNIT BLI1 (P35727)	MOL_ID: 1; ORGANISM_SCIENTIFIC: SACCHAROMYCES CEREVISIAE (STRAIN ATCC 204508 / S288C); ORGANISM_TAXID: 559292	01-JUL-21	12-OCT-21	n/a	13516	0.731	6.88	0.069	1.03	0.0014	3.11	0.0043	22.7	0.36	48	17.27	3.91	2.85	91.1	0	92.67	1.54341
E9Q1C7-F1	AF-E9Q1C7-F1-model_v1	ALPHAFOLD V2.0 PREDICTION FOR PREDICTED GENE 10471 (E9Q1C7)	MOL_ID: 1; ORGANISM_SCIENTIFIC: MUS MUSCULUS; ORGANISM_TAXID: 10090	01-JUL-21	12-OCT-21	n/a	29930.7	0.726	4.47	0.045	1.51	0.0021	4.79	0.0066	35.1	0.56	73.9	24.81	6.28	3.91	68.5	0	76.1	1.5428
Q59ZE0-F1	AF-Q59ZE0-F1-model_v1	ALPHAFOLD V2.0 PREDICTION FOR ATP SYNTHASE SUBUNIT 4, MITOCHONDRIAL (Q59ZE0)	MOL_ID: 1; ORGANISM_SCIENTIFIC: CANDIDA ALBICANS (STRAIN SC5314 / ATCC MYA-2876); ORGANISM_TAXID: 237561	01-JUL-21	12-OCT-21	n/a	25831.3	0.746	4.92	0.05	1.33	0.0017	4.35	0.0056	29.5	0.47	67.1	20.52	6.93	6.4	77.6	0	82.97	1.54253
A0A0N7KCY8-F1	AF-A0A0N7KCY8-F1-model_v1	ALPHAFOLD V2.0 PREDICTION FOR OS01G0366201 PROTEIN (A0A0N7KCY8)	MOL_ID: 1; ORGANISM_SCIENTIFIC: ORYZA SATIVA SUBSP. JAPONICA; ORGANISM_TAXID: 39947	01-JUL-21	12-OCT-21	n/a	10600	0.759	6.9	0.07	0.728	0.0011	3.1	0.0046	30.7	0.5	47.8	19.14	3.84	3.51	52.5	0	68.47	1.54194
Q96CN5-F1	AF-Q96CN5-F1-model_v1	ALPHAFOLD V2.0 PREDICTION FOR LEUCINE-RICH REPEAT-CONTAINING PROTEIN 45 (Q96CN5)	MOL_ID: 1; ORGANISM_SCIENTIFIC: HOMO SAPIENS; ORGANISM_TAXID: 9606	01-JUL-21	12-OCT-21	n/a	75957.4	0.733	2.93	0.03	2.45	0.0037	7.33	0.011	60.6	0.98	113	46.75	8.94	5.58	76.1	2.1	84.04	1.54161
A0A1D6KD25-F1	AF-A0A1D6KD25-F1-model_v1	ALPHAFOLD V2.0 PREDICTION FOR UNCHARACTERIZED PROTEIN (A0A1D6KD25)	MOL_ID: 1; ORGANISM_SCIENTIFIC: ZEA MAYS; ORGANISM_TAXID: 4577	01-JUL-21	12-OCT-21	n/a	11012	0.721	7.68	0.078	0.973	0.0013	2.79	0.0039	19.6	0.31	43	14.79	2.94	2.73	93.9	0	94.81	1.54122
F1M102-F1	AF-F1M102-F1-model_v1	ALPHAFOLD V2.0 PREDICTION FOR CADHERIN DOMAIN-CONTAINING PROTEIN (F1M102)	MOL_ID: 1; ORGANISM_SCIENTIFIC: RATTUS NORVEGICUS; ORGANISM_TAXID: 10116	01-JUL-21	12-OCT-21	n/a	14223.5	0.749	6.07	0.061	0.894	0.0013	3.53	0.005	32.4	0.52	54.3	20.56	4.53	2.93	26	12.6	74.7	1.53824
A0A0P0XY82-F1	AF-A0A0P0XY82-F1-model_v1	ALPHAFOLD V2.0 PREDICTION FOR OS10G0579250 PROTEIN (A0A0P0XY82)	MOL_ID: 1; ORGANISM_SCIENTIFIC: ORYZA SATIVA SUBSP. JAPONICA; ORGANISM_TAXID: 39947	01-JUL-21	12-OCT-21	n/a	7976.5	0.741	7.79	0.079	0.664	0.00091	2.75	0.0038	25.9	0.41	42.3	15.15	3.31	2.83	0	0	58.02	1.53818
C7J3N0-F1	AF-C7J3N0-F1-model_v1	ALPHAFOLD V2.0 PREDICTION FOR OS06G0581701 PROTEIN (C7J3N0)	MOL_ID: 1; ORGANISM_SCIENTIFIC: ORYZA SATIVA SUBSP. JAPONICA; ORGANISM_TAXID: 39947	01-JUL-21	12-OCT-21	n/a	5347.7	0.74	10	0.1	0.574	0.00076	2.14	0.0029	17.2	0.27	32.9	11.32	2.79	2.16	23.5	0	64.67	1.53738
Q9ULJ1-F1	AF-Q9ULJ1-F1-model_v1	ALPHAFOLD V2.0 PREDICTION FOR PROTEIN BCAP (Q9ULJ1)	MOL_ID: 1; ORGANISM_SCIENTIFIC: HOMO SAPIENS; ORGANISM_TAXID: 9606	01-JUL-21	12-OCT-21	n/a	73733.9	0.74	2.86	0.029	2.26	0.0033	7.49	0.011	56.3	0.91	115	40.2	14.86	7.87	88.8	0	81.12	1.53538
Q9VV26-F1	AF-Q9VV26-F1-model_v1	ALPHAFOLD V2.0 PREDICTION FOR GEO12049P1 (Q9VV26)	MOL_ID: 1; ORGANISM_SCIENTIFIC: DROSOPHILA MELANOGASTER; ORGANISM_TAXID: 7227	01-JUL-21	12-OCT-21	1-16	10587.8	0.75	7.5	0.076	0.818	0.0012	2.86	0.0041	22.7	0.36	43.9	15.92	4.67	3.09	3	53	74.73	1.53497
R4GDU9-F1	AF-R4GDU9-F1-model_v1	ALPHAFOLD V2.0 PREDICTION FOR SI:CH211-1F22.14 (R4GDU9)	MOL_ID: 1; ORGANISM_SCIENTIFIC: DANIO RERIO; ORGANISM_TAXID: 7955	01-JUL-21	12-OCT-21	1-24	63019.1	0.726	4.15	0.042	2.95	0.0043	5.16	0.0075	22.9	0.37	79.2	30.65	5.35	4.26	5.5	34.3	88.52	1.53488
Q9BXN6-F1	AF-Q9BXN6-F1-model_v1	ALPHAFOLD V2.0 PREDICTION FOR SPERM PROTEIN ASSOCIATED WITH THE NUCLEUS ON THE X CHROMOSOME D (Q9BXN6)	MOL_ID: 1; ORGANISM_SCIENTIFIC: HOMO SAPIENS; ORGANISM_TAXID: 9606	01-JUL-21	12-OCT-21	n/a	11030.2	0.722	6.74	0.068	0.852	0.0011	3.18	0.0042	28.1	0.45	48.8	14.73	6.06	3.15	7.3	22.9	68.25	1.53459
Q6IQT6-F1	AF-Q6IQT6-F1-model_v1	ALPHAFOLD V2.0 PREDICTION FOR BET1 GOLGI VESICULAR MEMBRANE-TRAFFICKING PROTEIN (Q6IQT6)	MOL_ID: 1; ORGANISM_SCIENTIFIC: DANIO RERIO; ORGANISM_TAXID: 7955	01-JUL-21	12-OCT-21	n/a	12699.5	0.743	6.69	0.068	0.901	0.0013	3.2	0.0045	27.2	0.43	49.1	17.79	4.83	3.08	83.9	0	86.09	1.53438
Q4DXS9-F1	AF-Q4DXS9-F1-model_v1	ALPHAFOLD V2.0 PREDICTION FOR GOLGI SNARE PROTEIN-LIKE, PUTATIVE (Q4DXS9)	MOL_ID: 1; ORGANISM_SCIENTIFIC: TRYPANOSOMA CRUZI (STRAIN CL BRENER); ORGANISM_TAXID: 353153	01-JUL-21	12-OCT-21	n/a	27340.8	0.732	5.41	0.055	1.63	0.0023	3.96	0.0055	23.2	0.37	60.7	21.29	6.32	3.2	92	0	83.68	1.53283
C7J0W0-F1	AF-C7J0W0-F1-model_v1	ALPHAFOLD V2.0 PREDICTION FOR OS04G0610100 PROTEIN (C7J0W0)	MOL_ID: 1; ORGANISM_SCIENTIFIC: ORYZA SATIVA SUBSP. JAPONICA; ORGANISM_TAXID: 39947	01-JUL-21	12-OCT-21	n/a	13103.6	0.717	5.62	0.057	0.859	0.0012	3.81	0.0053	41.6	0.67	58.4	19.74	7.68	4.69	5.2	0	61.57	1.53281
O75330-F1	AF-O75330-F1-model_v1	ALPHAFOLD V2.0 PREDICTION FOR HYALURONAN MEDIATED MOTILITY RECEPTOR (O75330)	MOL_ID: 1; ORGANISM_SCIENTIFIC: HOMO SAPIENS; ORGANISM_TAXID: 9606	01-JUL-21	12-OCT-21	n/a	84101.9	0.738	2.69	0.027	2.45	0.0035	7.96	0.011	58.3	0.94	122	44.54	10.58	7.79	76.8	0	75.68	1.53266
P0C7M6-F1	AF-P0C7M6-F1-model_v1	ALPHAFOLD V2.0 PREDICTION FOR IQ DOMAIN-CONTAINING PROTEIN F3 (P0C7M6)	MOL_ID: 1; ORGANISM_SCIENTIFIC: HOMO SAPIENS; ORGANISM_TAXID: 9606	01-JUL-21	12-OCT-21	n/a	18271.1	0.741	5.83	0.059	1.14	0.0016	3.67	0.0052	27.9	0.45	56.2	20.09	3.98	3.85	71.2	0	83.86	1.53134
Q96CS2-F1	AF-Q96CS2-F1-model_v1	ALPHAFOLD V2.0 PREDICTION FOR HAUS AUGMIN-LIKE COMPLEX SUBUNIT 1 (Q96CS2)	MOL_ID: 1; ORGANISM_SCIENTIFIC: HOMO SAPIENS; ORGANISM_TAXID: 9606	01-JUL-21	12-OCT-21	n/a	31861.3	0.74	4.7	0.047	1.61	0.0021	4.56	0.006	27.6	0.44	69.8	21.97	8.43	4.15	83.4	0	88.83	1.5307
Q4DK32-F1	AF-Q4DK32-F1-model_v1	ALPHAFOLD V2.0 PREDICTION FOR UNCHARACTERIZED PROTEIN (Q4DK32)	MOL_ID: 1; ORGANISM_SCIENTIFIC: TRYPANOSOMA CRUZI (STRAIN CL BRENER); ORGANISM_TAXID: 353153	01-JUL-21	12-OCT-21	n/a	57922.7	0.729	3.7	0.037	2.4	0.0034	5.78	0.0082	33.2	0.53	88.4	31.04	9	5.78	73.3	0	78.72	1.52941
Q4DPD6-F1	AF-Q4DPD6-F1-model_v1	ALPHAFOLD V2.0 PREDICTION FOR RING-TYPE DOMAIN-CONTAINING PROTEIN (Q4DPD6)	MOL_ID: 1; ORGANISM_SCIENTIFIC: TRYPANOSOMA CRUZI (STRAIN CL BRENER); ORGANISM_TAXID: 353153	01-JUL-21	12-OCT-21	n/a	17944.6	0.738	6.55	0.066	1.27	0.0017	3.27	0.0044	19.1	0.3	50	16.53	5.15	3.05	60.5	3.8	88.76	1.52905
P23763-F1	AF-P23763-F1-model_v1	ALPHAFOLD V2.0 PREDICTION FOR VESICLE-ASSOCIATED MEMBRANE PROTEIN 1 (P23763)	MOL_ID: 1; ORGANISM_SCIENTIFIC: HOMO SAPIENS; ORGANISM_TAXID: 9606	01-JUL-21	12-OCT-21	n/a	12903.7	0.739	6.31	0.064	0.877	0.0012	3.39	0.0047	31.5	0.5	51.8	18.32	5.9	3.37	76.1	0	73.56	1.52802
Q0DMG8-F1	AF-Q0DMG8-F1-model_v1	ALPHAFOLD V2.0 PREDICTION FOR OS03G0809200 PROTEIN (Q0DMG8)	MOL_ID: 1; ORGANISM_SCIENTIFIC: ORYZA SATIVA SUBSP. JAPONICA; ORGANISM_TAXID: 39947	01-JUL-21	12-OCT-21	n/a	10978.3	0.722	7.28	0.074	0.916	0.0013	2.94	0.0042	24.2	0.39	44.9	16.92	3.89	2.31	79.4	0	83.39	1.52721
Q6K839-F1	AF-Q6K839-F1-model_v1	ALPHAFOLD V2.0 PREDICTION FOR OS02G0805700 PROTEIN (Q6K839)	MOL_ID: 1; ORGANISM_SCIENTIFIC: ORYZA SATIVA SUBSP. JAPONICA; ORGANISM_TAXID: 39947	01-JUL-21	12-OCT-21	n/a	16224.9	0.728	5.78	0.058	1.05	0.0016	3.7	0.0055	33.8	0.55	56.5	22.3	5.82	2.89	83.2	0	82.36	1.52703
I1N2G8-F1	AF-I1N2G8-F1-model_v1	ALPHAFOLD V2.0 PREDICTION FOR UNCHARACTERIZED PROTEIN (I1N2G8)	MOL_ID: 1; ORGANISM_SCIENTIFIC: GLYCINE MAX; ORGANISM_TAXID: 3847	01-JUL-21	12-OCT-21	n/a	5773.1	0.711	9.59	0.097	0.659	0.00088	2.24	0.003	18.2	0.29	34.2	11.07	3.1	2.39	9.3	0	68.56	1.52679
P02810-F1	AF-P02810-F1-model_v1	ALPHAFOLD V2.0 PREDICTION FOR SALIVARY ACIDIC PROLINE-RICH PHOSPHOPROTEIN 1/2 (P02810)	MOL_ID: 1; ORGANISM_SCIENTIFIC: HOMO SAPIENS; ORGANISM_TAXID: 9606	01-JUL-21	12-OCT-21	1-16	15368.2	0.698	4.95	0.05	0.946	0.0013	4.33	0.0061	53.9	0.87	66.1	24.47	6.22	6.08	0	0	65.37	1.52656
Q4D718-F1	AF-Q4D718-F1-model_v1	ALPHAFOLD V2.0 PREDICTION FOR UNCHARACTERIZED PROTEIN (Q4D718)	MOL_ID: 1; ORGANISM_SCIENTIFIC: TRYPANOSOMA CRUZI (STRAIN CL BRENER); ORGANISM_TAXID: 353153	01-JUL-21	12-OCT-21	n/a	15010.4	0.733	6.17	0.062	1.02	0.0014	3.47	0.0047	26.4	0.42	52.9	18.42	4.74	3.4	76	0	82.89	1.5245
Q8BUK6-F1	AF-Q8BUK6-F1-model_v1	ALPHAFOLD V2.0 PREDICTION FOR PROTEIN HOOK HOMOLOG 3 (Q8BUK6)	MOL_ID: 1; ORGANISM_SCIENTIFIC: MUS MUSCULUS; ORGANISM_TAXID: 10090	01-JUL-21	12-OCT-21	n/a	83201.5	0.733	2.87	0.029	2.62	0.0035	7.48	0.0099	44.9	0.71	114	37.64	12.71	10.25	80.6	0.6	82.26	1.52406
A0A0R4IWE4-F1	AF-A0A0R4IWE4-F1-model_v1	ALPHAFOLD V2.0 PREDICTION FOR SI:CH211-57N23.1 (A0A0R4IWE4)	MOL_ID: 1; ORGANISM_SCIENTIFIC: DANIO RERIO; ORGANISM_TAXID: 7955	01-JUL-21	12-OCT-21	1-40	20500.7	0.724	6	0.061	1.4	0.0019	3.57	0.0048	21.3	0.34	54.4	18.23	5.21	4.16	68.2	0	72.84	1.52381
Q96LB4-F1	AF-Q96LB4-F1-model_v1	ALPHAFOLD V2.0 PREDICTION FOR V-TYPE PROTON ATPASE SUBUNIT G 3 (Q96LB4)	MOL_ID: 1; ORGANISM_SCIENTIFIC: HOMO SAPIENS; ORGANISM_TAXID: 9606	01-JUL-21	12-OCT-21	n/a	13923.8	0.73	6.56	0.066	1.02	0.0014	3.27	0.0045	25.1	0.4	49.8	17.75	5.45	2.27	87.2	0	92.9	1.52294
B0S5I7-F1	AF-B0S5I7-F1-model_v1	ALPHAFOLD V2.0 PREDICTION FOR ZGC:113691 (B0S5I7)	MOL_ID: 1; ORGANISM_SCIENTIFIC: DANIO RERIO; ORGANISM_TAXID: 7955	01-JUL-21	12-OCT-21	n/a	27071.7	0.737	4.74	0.048	1.39	0.0019	4.52	0.0063	33.3	0.53	68.8	24.8	5.87	5.44	68.2	0	82.09	1.52212
A0A0R0GY28-F1	AF-A0A0R0GY28-F1-model_v1	ALPHAFOLD V2.0 PREDICTION FOR UNCHARACTERIZED PROTEIN (A0A0R0GY28)	MOL_ID: 1; ORGANISM_SCIENTIFIC: GLYCINE MAX; ORGANISM_TAXID: 3847	01-JUL-21	12-OCT-21	n/a	11917.5	0.748	7.54	0.076	0.934	0.0013	2.84	0.004	18.9	0.3	43.2	15.69	3.67	2.41	95	0	80.14	1.52113
Q06071-F1	AF-Q06071-F1-model_v1	ALPHAFOLD V2.0 PREDICTION FOR BIOGENESIS OF LYSOSOME-RELATED ORGANELLES COMPLEX 1 SUBUNIT BLS1 (Q06071)	MOL_ID: 1; ORGANISM_SCIENTIFIC: SACCHAROMYCES CEREVISIAE (STRAIN ATCC 204508 / S288C); ORGANISM_TAXID: 559292	01-JUL-21	12-OCT-21	n/a	14552.7	0.741	6.71	0.068	1.04	0.0014	3.19	0.0044	22.1	0.35	48.5	16.72	5.19	2.92	89.3	0	83.1	1.52038
D3ZUD5-F1	AF-D3ZUD5-F1-model_v1	ALPHAFOLD V2.0 PREDICTION FOR OFD1, CENTRIOLE AND CENTRIOLAR SATELLITE PROTEIN (D3ZUD5)	MOL_ID: 1; ORGANISM_SCIENTIFIC: RATTUS NORVEGICUS; ORGANISM_TAXID: 10116	01-JUL-21	12-OCT-21	n/a	118353	0.73	2.09	0.021	2.76	0.0038	10.2	0.014	84.6	1.35	155	57.26	14.11	9.9	57.4	0	66.45	1.51961
Q2NL98-F1	AF-Q2NL98-F1-model_v1	ALPHAFOLD V2.0 PREDICTION FOR VIMENTIN-TYPE INTERMEDIATE FILAMENT-ASSOCIATED COILED-COIL PROTEIN (Q2NL98)	MOL_ID: 1; ORGANISM_SCIENTIFIC: HOMO SAPIENS; ORGANISM_TAXID: 9606	01-JUL-21	12-OCT-21	n/a	18344.4	0.73	5.6	0.057	1.14	0.0016	3.83	0.0054	30.4	0.49	58.2	20.56	4.69	3.24	72	0	85.52	1.51958
O97980-F1	AF-O97980-F1-model_v1	ALPHAFOLD V2.0 PREDICTION FOR MINOR HISTOCOMPATIBILITY PROTEIN HB-1 (O97980)	MOL_ID: 1; ORGANISM_SCIENTIFIC: HOMO SAPIENS; ORGANISM_TAXID: 9606	01-JUL-21	12-OCT-21	n/a	4961.6	0.721	9.29	0.094	0.53	0.00072	2.31	0.0031	24	0.38	35.1	12.26	2.76	2.08	0	0	73.85	1.51948
E7EZM2-F1	AF-E7EZM2-F1-model_v1	ALPHAFOLD V2.0 PREDICTION FOR CENTROSOMAL PROTEIN 112 (E7EZM2)	MOL_ID: 1; ORGANISM_SCIENTIFIC: DANIO RERIO; ORGANISM_TAXID: 7955	01-JUL-21	12-OCT-21	n/a	110315	0.728	2.43	0.025	3.01	0.0043	8.82	0.013	63.2	1.01	134	50.44	13.08	7.86	80	0	76.9	1.51927
A0A1D6LXV5-F1	AF-A0A1D6LXV5-F1-model_v1	ALPHAFOLD V2.0 PREDICTION FOR STRUCTURAL MAINTENANCE OF CHROMOSOMES PROTEIN 4 (A0A1D6LXV5)	MOL_ID: 1; ORGANISM_SCIENTIFIC: ZEA MAYS; ORGANISM_TAXID: 4577	01-JUL-21	12-OCT-21	n/a	25192.4	0.745	5.08	0.051	1.35	0.0019	4.22	0.0061	30.8	0.5	64.1	24.98	5.22	3.99	90	0	87.53	1.51896
Q6QZQ4-F1	AF-Q6QZQ4-F1-model_v1	ALPHAFOLD V2.0 PREDICTION FOR VIMENTIN-TYPE INTERMEDIATE FILAMENT-ASSOCIATED COILED-COIL PROTEIN (Q6QZQ4)	MOL_ID: 1; ORGANISM_SCIENTIFIC: RATTUS NORVEGICUS; ORGANISM_TAXID: 10116	01-JUL-21	12-OCT-21	n/a	18839	0.729	5.5	0.056	1.16	0.0016	3.9	0.0054	31	0.49	59.2	21.18	4.9	3.63	70.6	0	84.14	1.51795
Q502W7-F1	AF-Q502W7-F1-model_v1	ALPHAFOLD V2.0 PREDICTION FOR COILED-COIL DOMAIN-CONTAINING PROTEIN 38 (Q502W7)	MOL_ID: 1; ORGANISM_SCIENTIFIC: HOMO SAPIENS; ORGANISM_TAXID: 9606	01-JUL-21	12-OCT-21	n/a	65333.2	0.739	3.01	0.03	2.12	0.0028	7.12	0.0093	50.7	0.8	108	35.42	9.06	8.41	63.4	0	73	1.51685
A8MYZ5-F1	AF-A8MYZ5-F1-model_v1	ALPHAFOLD V2.0 PREDICTION FOR IQ DOMAIN-CONTAINING PROTEIN F6 (A8MYZ5)	MOL_ID: 1; ORGANISM_SCIENTIFIC: HOMO SAPIENS; ORGANISM_TAXID: 9606	01-JUL-21	12-OCT-21	n/a	13076.3	0.74	7.2	0.073	1.01	0.0014	2.98	0.0041	20.4	0.32	45.2	16.01	3.88	2.54	76.4	15.1	93.21	1.51678
A0A0P0V2S0-F1	AF-A0A0P0V2S0-F1-model_v1	ALPHAFOLD V2.0 PREDICTION FOR OS01G0385000 PROTEIN (A0A0P0V2S0)	MOL_ID: 1; ORGANISM_SCIENTIFIC: ORYZA SATIVA SUBSP. JAPONICA; ORGANISM_TAXID: 39947	01-JUL-21	12-OCT-21	n/a	17473.2	0.732	5.51	0.056	1.06	0.0014	3.89	0.0052	33.6	0.53	58.9	20.29	6.12	3.99	61	0	73.21	1.51414
Q9HBI5-F1	AF-Q9HBI5-F1-model_v1	ALPHAFOLD V2.0 PREDICTION FOR UNCHARACTERIZED PROTEIN C3ORF14 (Q9HBI5)	MOL_ID: 1; ORGANISM_SCIENTIFIC: HOMO SAPIENS; ORGANISM_TAXID: 9606	01-JUL-21	12-OCT-21	n/a	15007	0.735	6.71	0.068	1.1	0.0015	3.19	0.0043	20.7	0.33	48.3	15.39	5.43	3.65	78.7	0	86.62	1.51411
Q8T1V8-F1	AF-Q8T1V8-F1-model_v1	ALPHAFOLD V2.0 PREDICTION FOR PUTATIVE UNCHARACTERIZED PROTEIN DDB_G0277609 (Q8T1V8)	MOL_ID: 1; ORGANISM_SCIENTIFIC: DICTYOSTELIUM DISCOIDEUM; ORGANISM_TAXID: 44689	01-JUL-21	12-OCT-21	n/a	5920.8	0.716	9.66	0.098	0.669	0.00094	2.22	0.0031	18.9	0.3	33.6	12.65	2.17	1.88	0	40	71.04	1.51351
F1M9B8-F1	AF-F1M9B8-F1-model_v1	ALPHAFOLD V2.0 PREDICTION FOR SUBMAXILLARY GLAND ANDROGEN-REGULATED PROTEIN 3A (F1M9B8)	MOL_ID: 1; ORGANISM_SCIENTIFIC: RATTUS NORVEGICUS; ORGANISM_TAXID: 10116	01-JUL-21	12-OCT-21	1-22	11495.2	0.725	6.36	0.064	0.829	0.0011	3.37	0.0045	31.4	0.5	51	15.44	7.51	3.17	0	0	64.58	1.51335
A0A1B0GV03-F1	AF-A0A1B0GV03-F1-model_v1	ALPHAFOLD V2.0 PREDICTION FOR GOLGIN SUBFAMILY A MEMBER 6-LIKE PROTEIN 7 (A0A1B0GV03)	MOL_ID: 1; ORGANISM_SCIENTIFIC: HOMO SAPIENS; ORGANISM_TAXID: 9606	01-JUL-21	12-OCT-21	n/a	75569.2	0.716	2.84	0.029	2.51	0.0036	7.54	0.011	57.6	0.93	114	44.66	8.57	6.39	77.8	0	72.48	1.51194
A0A1D6PDT8-F1	AF-A0A1D6PDT8-F1-model_v1	ALPHAFOLD V2.0 PREDICTION FOR UNCHARACTERIZED PROTEIN (A0A1D6PDT8)	MOL_ID: 1; ORGANISM_SCIENTIFIC: ZEA MAYS; ORGANISM_TAXID: 4577	01-JUL-21	12-OCT-21	n/a	9369.4	0.752	8.44	0.085	0.808	0.0011	2.54	0.0035	17.4	0.28	38.4	13.89	1.94	2.07	97.7	0	74.5	1.51181
Q4DIU3-F1	AF-Q4DIU3-F1-model_v1	ALPHAFOLD V2.0 PREDICTION FOR L51_S25_CI-B8 DOMAIN-CONTAINING PROTEIN (Q4DIU3)	MOL_ID: 1; ORGANISM_SCIENTIFIC: TRYPANOSOMA CRUZI (STRAIN CL BRENER); ORGANISM_TAXID: 353153	01-JUL-21	12-OCT-21	n/a	31648.7	0.722	5.04	0.051	1.83	0.0023	4.25	0.0054	21.3	0.34	64.2	18.99	9.59	4.41	45.6	8.1	92.82	1.51059
A8MVS5-F1	AF-A8MVS5-F1-model_v1	ALPHAFOLD V2.0 PREDICTION FOR PROTEIN HIDE1 (A8MVS5)	MOL_ID: 1; ORGANISM_SCIENTIFIC: HOMO SAPIENS; ORGANISM_TAXID: 9606	01-JUL-21	12-OCT-21	1-19	22816.8	0.731	5.58	0.056	1.41	0.0019	3.84	0.0051	23.3	0.37	57.9	19.28	5.07	4.99	21.9	14.3	75.31	1.50781
D4A1B7-F1	AF-D4A1B7-F1-model_v1	ALPHAFOLD V2.0 PREDICTION FOR DEVELOPMENTAL PLURIPOTENCY ASSOCIATED 1 (PREDICTED), ISOFORM CRA_A (D4A1B7)	MOL_ID: 1; ORGANISM_SCIENTIFIC: RATTUS NORVEGICUS; ORGANISM_TAXID: 10116	01-JUL-21	12-OCT-21	1-20	10780.9	0.746	6.88	0.069	0.777	0.0011	3.12	0.0043	28.3	0.45	47	17.27	3.55	2.95	43.3	0	64.79	1.50641
Q4D324-F1	AF-Q4D324-F1-model_v1	ALPHAFOLD V2.0 PREDICTION FOR UNCHARACTERIZED PROTEIN (Q4D324)	MOL_ID: 1; ORGANISM_SCIENTIFIC: TRYPANOSOMA CRUZI (STRAIN CL BRENER); ORGANISM_TAXID: 353153	01-JUL-21	12-OCT-21	1-33	102510	0.685	3.41	0.034	4.54	0.0065	6.28	0.009	25.1	0.4	94.3	34.94	7.46	5.92	0	32.9	64.38	1.50159
P0CW27-F1	AF-P0CW27-F1-model_v1	ALPHAFOLD V2.0 PREDICTION FOR COILED-COIL DOMAIN-CONTAINING PROTEIN 166 (P0CW27)	MOL_ID: 1; ORGANISM_SCIENTIFIC: HOMO SAPIENS; ORGANISM_TAXID: 9606	01-JUL-21	12-OCT-21	n/a	48738	0.728	3.22	0.032	1.76	0.0024	6.66	0.0092	57.2	0.91	100	37.41	9.1	7.56	55.2	0	71.06	1.5015
E7F6M2-F1	AF-E7F6M2-F1-model_v1	ALPHAFOLD V2.0 PREDICTION FOR SI:CH211-235M3.5 (E7F6M2)	MOL_ID: 1; ORGANISM_SCIENTIFIC: DANIO RERIO; ORGANISM_TAXID: 7955	01-JUL-21	12-OCT-21	n/a	56803.4	0.724	3.38	0.034	2.18	0.0031	6.34	0.009	44.3	0.71	95.1	35.81	7.28	7.69	78.7	0	81.09	1.5
A0A1D6F437-F1	AF-A0A1D6F437-F1-model_v1	ALPHAFOLD V2.0 PREDICTION FOR UVEAL AUTOANTIGEN WITH COILED-COIL DOMAINS AND ANKYRIN REPEATS ISOFORM 4 (A0A1D6F437)	MOL_ID: 1; ORGANISM_SCIENTIFIC: ZEA MAYS; ORGANISM_TAXID: 4577	01-JUL-21	12-OCT-21	n/a	13965.9	0.721	6.09	0.061	0.978	0.0013	3.52	0.0048	31.4	0.5	52.8	18.01	7.23	3.06	71.8	0	84.27	1.5
I1MVJ2-F1	AF-I1MVJ2-F1-model_v1	ALPHAFOLD V2.0 PREDICTION FOR UNCHARACTERIZED PROTEIN (I1MVJ2)	MOL_ID: 1; ORGANISM_SCIENTIFIC: GLYCINE MAX; ORGANISM_TAXID: 3847	01-JUL-21	12-OCT-21	n/a	30121.2	0.736	4.8	0.048	1.57	0.0022	4.47	0.0063	29.1	0.47	67	25.46	5.27	4.25	72.4	0	75.72	1.49888
M0QWQ9-F1	AF-M0QWQ9-F1-model_v1	ALPHAFOLD V2.0 PREDICTION FOR PREDICTED GENE 17174 (M0QWQ9)	MOL_ID: 1; ORGANISM_SCIENTIFIC: MUS MUSCULUS; ORGANISM_TAXID: 10090	01-JUL-21	12-OCT-21	n/a	25489.8	0.728	5.14	0.052	1.47	0.002	4.17	0.0057	26.9	0.43	62.5	22.54	4.75	4.55	81.4	0	82.19	1.4988
F1M4C6-F1	AF-F1M4C6-F1-model_v1	ALPHAFOLD V2.0 PREDICTION FOR TAKUSAN DOMAIN-CONTAINING PROTEIN (F1M4C6)	MOL_ID: 1; ORGANISM_SCIENTIFIC: RATTUS NORVEGICUS; ORGANISM_TAXID: 10116	01-JUL-21	12-OCT-21	n/a	22204.5	0.733	5.34	0.054	1.31	0.0018	4.01	0.0055	29.3	0.47	60.1	22.35	4.75	3.97	77.4	0	78.2	1.49875
Q8N7X8-F1	AF-Q8N7X8-F1-model_v1	ALPHAFOLD V2.0 PREDICTION FOR SIGLEC FAMILY-LIKE PROTEIN 1 (Q8N7X8)	MOL_ID: 1; ORGANISM_SCIENTIFIC: HOMO SAPIENS; ORGANISM_TAXID: 9606	01-JUL-21	12-OCT-21	n/a	21293.2	0.752	5.48	0.055	1.19	0.0017	3.91	0.0055	28.7	0.46	58.6	20.44	6.47	4.78	34.7	24.5	83.26	1.49872
Q4CND4-F1	AF-Q4CND4-F1-model_v1	ALPHAFOLD V2.0 PREDICTION FOR UNCHARACTERIZED PROTEIN (Q4CND4)	MOL_ID: 1; ORGANISM_SCIENTIFIC: TRYPANOSOMA CRUZI (STRAIN CL BRENER); ORGANISM_TAXID: 353153	01-JUL-21	12-OCT-21	n/a	12244.3	0.735	6.47	0.065	0.866	0.0012	3.31	0.0045	30	0.48	49.6	17.33	6.1	2.86	52.8	0	57.98	1.49849
A0A1D6F8J0-F1	AF-A0A1D6F8J0-F1-model_v1	ALPHAFOLD V2.0 PREDICTION FOR UNCHARACTERIZED PROTEIN (A0A1D6F8J0)	MOL_ID: 1; ORGANISM_SCIENTIFIC: ZEA MAYS; ORGANISM_TAXID: 4577	01-JUL-21	12-OCT-21	n/a	10603.7	0.747	7.43	0.075	0.822	0.0011	2.89	0.0039	22.5	0.36	43.3	14.92	4.74	2.52	77.2	0	62.39	1.49827
C6KSS4-F1	AF-C6KSS4-F1-model_v1	ALPHAFOLD V2.0 PREDICTION FOR SPINDLE ASSEMBLY ABNORMAL PROTEIN 6, PUTATIVE (C6KSS4)	MOL_ID: 1; ORGANISM_SCIENTIFIC: PLASMODIUM FALCIPARUM (ISOLATE 3D7); ORGANISM_TAXID: 36329	01-JUL-21	12-OCT-21	n/a	101245	0.724	2.55	0.026	2.94	0.0039	8.41	0.011	54.2	0.86	126	42.97	10.04	10.56	40.4	7.7	62.61	1.49822
Q0JEA9-F1	AF-Q0JEA9-F1-model_v1	ALPHAFOLD V2.0 PREDICTION FOR OS04G0304000 PROTEIN (Q0JEA9)	MOL_ID: 1; ORGANISM_SCIENTIFIC: ORYZA SATIVA SUBSP. JAPONICA; ORGANISM_TAXID: 39947	01-JUL-21	12-OCT-21	n/a	15602.9	0.725	5.55	0.056	0.982	0.0013	3.86	0.0052	36.5	0.58	57.8	19.35	6.13	5.46	55	0	76.33	1.49741
Q9H0I3-F1	AF-Q9H0I3-F1-model_v1	ALPHAFOLD V2.0 PREDICTION FOR COILED-COIL DOMAIN-CONTAINING PROTEIN 113 (Q9H0I3)	MOL_ID: 1; ORGANISM_SCIENTIFIC: HOMO SAPIENS; ORGANISM_TAXID: 9606	01-JUL-21	12-OCT-21	n/a	44232.7	0.74	3.63	0.037	1.72	0.0024	5.9	0.0081	44.7	0.71	88.3	27.77	14.29	8.11	80	0	82.17	1.49661
Q59LX2-F1	AF-Q59LX2-F1-model_v1	ALPHAFOLD V2.0 PREDICTION FOR UNCHARACTERIZED PROTEIN (Q59LX2)	MOL_ID: 1; ORGANISM_SCIENTIFIC: CANDIDA ALBICANS (STRAIN SC5314 / ATCC MYA-2876); ORGANISM_TAXID: 237561	01-JUL-21	12-OCT-21	n/a	12435.5	0.752	7.28	0.074	0.926	0.0013	2.94	0.004	20.1	0.32	44	15.43	4.78	2.37	86.2	0	63.69	1.4966
L7N2E0-F1	AF-L7N2E0-F1-model_v1	ALPHAFOLD V2.0 PREDICTION FOR PREDICTED GENE 8024 (L7N2E0)	MOL_ID: 1; ORGANISM_SCIENTIFIC: MUS MUSCULUS; ORGANISM_TAXID: 10090	01-JUL-21	12-OCT-21	n/a	12055.7	0.735	7.54	0.076	0.993	0.0014	2.84	0.0039	18.7	0.3	42.5	15.34	3.43	2.88	98	0	96.59	1.49648
Q4D196-F1	AF-Q4D196-F1-model_v1	ALPHAFOLD V2.0 PREDICTION FOR UNCHARACTERIZED PROTEIN (Q4D196)	MOL_ID: 1; ORGANISM_SCIENTIFIC: TRYPANOSOMA CRUZI (STRAIN CL BRENER); ORGANISM_TAXID: 353153	01-JUL-21	12-OCT-21	n/a	26134.3	0.729	5.25	0.053	1.53	0.0021	4.09	0.0056	25.6	0.41	61.2	23.18	4.59	3.25	89.5	0	81.24	1.49633
A4HTC0-F1	AF-A4HTC0-F1-model_v1	ALPHAFOLD V2.0 PREDICTION FOR UNCHARACTERIZED PROTEIN (A4HTC0)	MOL_ID: 1; ORGANISM_SCIENTIFIC: LEISHMANIA INFANTUM; ORGANISM_TAXID: 5671	01-JUL-21	12-OCT-21	n/a	79158.9	0.726	2.41	0.024	2.15	0.0031	8.9	0.013	82.9	1.34	133	51.27	12.18	11.63	50	0	65.65	1.49438
Q5TYJ7-F1	AF-Q5TYJ7-F1-model_v1	ALPHAFOLD V2.0 PREDICTION FOR UNCHARACTERIZED PROTEIN (Q5TYJ7)	MOL_ID: 1; ORGANISM_SCIENTIFIC: CAENORHABDITIS ELEGANS; ORGANISM_TAXID: 6239	01-JUL-21	12-OCT-21	n/a	46530.2	0.736	4.03	0.041	2.04	0.0028	5.32	0.0073	29.7	0.47	79.4	25.83	9.65	5.07	66.8	3.3	67.1	1.49248
C6KTD7-F1	AF-C6KTD7-F1-model_v1	ALPHAFOLD V2.0 PREDICTION FOR SECRETED OOKINETE PROTEIN, PUTATIVE (C6KTD7)	MOL_ID: 1; ORGANISM_SCIENTIFIC: PLASMODIUM FALCIPARUM (ISOLATE 3D7); ORGANISM_TAXID: 36329	01-JUL-21	12-OCT-21	1-18	13659.5	0.753	6.79	0.069	0.945	0.0013	3.15	0.0042	21.5	0.34	47	15.85	5.26	2.8	73.3	0	82.04	1.49206
Q54IG3-F1	AF-Q54IG3-F1-model_v1	ALPHAFOLD V2.0 PREDICTION FOR UNCHARACTERIZED PROTEIN (Q54IG3)	MOL_ID: 1; ORGANISM_SCIENTIFIC: DICTYOSTELIUM DISCOIDEUM; ORGANISM_TAXID: 44689	01-JUL-21	12-OCT-21	1-27	46608.6	0.709	4.35	0.044	2.43	0.0032	4.92	0.0066	23	0.36	73.4	23.15	7.54	6.38	0.9	18.2	79.1	1.49187
Q18519-F1	AF-Q18519-F1-model_v1	ALPHAFOLD V2.0 PREDICTION FOR UNCHARACTERIZED PROTEIN (Q18519)	MOL_ID: 1; ORGANISM_SCIENTIFIC: CAENORHABDITIS ELEGANS; ORGANISM_TAXID: 6239	01-JUL-21	12-OCT-21	n/a	13803.2	0.725	6.35	0.064	0.993	0.0014	3.38	0.0047	27.1	0.43	50.4	17.28	5.85	2.66	75.2	0	84.89	1.49112
M0R829-F1	AF-M0R829-F1-model_v1	ALPHAFOLD V2.0 PREDICTION FOR UNCHARACTERIZED PROTEIN (M0R829)	MOL_ID: 1; ORGANISM_SCIENTIFIC: RATTUS NORVEGICUS; ORGANISM_TAXID: 10116	01-JUL-21	12-OCT-21	n/a	86750.2	0.747	3.81	0.038	3.45	0.0044	5.62	0.0072	17.8	0.28	83.8	24.88	8.17	7.63	45.8	11.9	77.97	1.4911
A0A0P0VRT0-F1	AF-A0A0P0VRT0-F1-model_v1	ALPHAFOLD V2.0 PREDICTION FOR OS03G0100275 PROTEIN (A0A0P0VRT0)	MOL_ID: 1; ORGANISM_SCIENTIFIC: ORYZA SATIVA SUBSP. JAPONICA; ORGANISM_TAXID: 39947	01-JUL-21	12-OCT-21	n/a	44195	0.719	3.84	0.039	1.96	0.0028	5.59	0.008	40.6	0.65	83.3	32.27	9.64	5.29	80.5	0	82.43	1.49016
A4HUN4-F1	AF-A4HUN4-F1-model_v1	ALPHAFOLD V2.0 PREDICTION FOR HYPOTHETICAL_PROTEIN_-_CONSERVED (A4HUN4)	MOL_ID: 1; ORGANISM_SCIENTIFIC: LEISHMANIA INFANTUM; ORGANISM_TAXID: 5671	01-JUL-21	12-OCT-21	n/a	63454	0.727	3.55	0.036	2.53	0.0033	6.04	0.0079	30.9	0.49	90	30.24	9.67	7.08	79	0	80.09	1.49007
A0A0R4II09-F1	AF-A0A0R4II09-F1-model_v1	ALPHAFOLD V2.0 PREDICTION FOR CADHERIN 16, KSP-CADHERIN (A0A0R4II09)	MOL_ID: 1; ORGANISM_SCIENTIFIC: DANIO RERIO; ORGANISM_TAXID: 7955	01-JUL-21	12-OCT-21	1-23	88432.5	0.733	3.6	0.036	3.5	0.0047	5.96	0.008	22.4	0.36	88.8	28.92	9.41	9.1	5.4	33.3	88.49	1.48993
Q58FW3-F1	AF-Q58FW3-F1-model_v1	ALPHAFOLD V2.0 PREDICTION FOR TROPOMYOSIN (Q58FW3)	MOL_ID: 1; ORGANISM_SCIENTIFIC: ARABIDOPSIS THALIANA; ORGANISM_TAXID: 3702	01-JUL-21	12-OCT-21	n/a	36566.7	0.732	4.02	0.041	1.62	0.0023	5.33	0.0077	40.7	0.66	79.4	29.96	7.98	7.56	78	0	84.22	1.48968
Q96A19-F1	AF-Q96A19-F1-model_v1	ALPHAFOLD V2.0 PREDICTION FOR COILED-COIL DOMAIN-CONTAINING PROTEIN 102A (Q96A19)	MOL_ID: 1; ORGANISM_SCIENTIFIC: HOMO SAPIENS; ORGANISM_TAXID: 9606	01-JUL-21	12-OCT-21	n/a	62593.6	0.725	2.95	0.03	2.1	0.003	7.25	0.01	59.7	0.96	108	41.62	10.2	6.79	70.5	0	76.58	1.48966
Q9FJ36-F1	AF-Q9FJ36-F1-model_v1	ALPHAFOLD V2.0 PREDICTION FOR MYOSIN HEAVY CHAIN-LIKE (Q9FJ36)	MOL_ID: 1; ORGANISM_SCIENTIFIC: ARABIDOPSIS THALIANA; ORGANISM_TAXID: 3702	01-JUL-21	12-OCT-21	n/a	62748.9	0.74	3.13	0.032	2.1	0.0028	6.85	0.0093	48.2	0.77	102	35.99	12.39	5.58	87.5	0	81.21	1.48905
A3QMC6-F1	AF-A3QMC6-F1-model_v1	ALPHAFOLD V2.0 PREDICTION FOR ERLIN (A3QMC6)	MOL_ID: 1; ORGANISM_SCIENTIFIC: CAENORHABDITIS ELEGANS; ORGANISM_TAXID: 6239	01-JUL-21	12-OCT-21	n/a	35325.9	0.747	4.74	0.048	1.75	0.0024	4.52	0.0062	26.2	0.42	67.3	22.86	7.26	5.71	58.5	13.8	89.23	1.48894
O75477-F1	AF-O75477-F1-model_v1	ALPHAFOLD V2.0 PREDICTION FOR ERLIN-1 (O75477)	MOL_ID: 1; ORGANISM_SCIENTIFIC: HOMO SAPIENS; ORGANISM_TAXID: 9606	01-JUL-21	12-OCT-21	n/a	39178	0.744	4.42	0.045	1.83	0.0025	4.85	0.0066	27.9	0.45	72.2	25.14	7.24	5.46	53.6	12.7	84.64	1.48866
M0RAJ0-F1	AF-M0RAJ0-F1-model_v1	ALPHAFOLD V2.0 PREDICTION FOR UNCHARACTERIZED PROTEIN (M0RAJ0)	MOL_ID: 1; ORGANISM_SCIENTIFIC: RATTUS NORVEGICUS; ORGANISM_TAXID: 10116	01-JUL-21	12-OCT-21	n/a	38496.4	0.736	4.57	0.046	1.91	0.0027	4.69	0.0065	27.6	0.44	69.8	25.54	6.47	5.46	67.3	8.9	85.61	1.48827
A0A1D6JTA0-F1	AF-A0A1D6JTA0-F1-model_v1	ALPHAFOLD V2.0 PREDICTION FOR ATMAP70-2 (A0A1D6JTA0)	MOL_ID: 1; ORGANISM_SCIENTIFIC: ZEA MAYS; ORGANISM_TAXID: 4577	01-JUL-21	12-OCT-21	n/a	58588.4	0.734	2.95	0.03	1.9	0.0026	7.26	0.0098	60	0.96	108	37.64	14.83	7.43	58.6	0	72.37	1.4876
O16263-F1	AF-O16263-F1-model_v1	ALPHAFOLD V2.0 PREDICTION FOR UNCHARACTERIZED PROTEIN (O16263)	MOL_ID: 1; ORGANISM_SCIENTIFIC: CAENORHABDITIS ELEGANS; ORGANISM_TAXID: 6239	01-JUL-21	12-OCT-21	n/a	10651	0.747	7.63	0.077	0.848	0.0012	2.81	0.0039	21.1	0.34	41.8	15.77	2.93	2.16	82.4	0	84.07	1.48754
Q94274-F1	AF-Q94274-F1-model_v1	ALPHAFOLD V2.0 PREDICTION FOR UNCHARACTERIZED PROTEIN (Q94274)	MOL_ID: 1; ORGANISM_SCIENTIFIC: CAENORHABDITIS ELEGANS; ORGANISM_TAXID: 6239	01-JUL-21	12-OCT-21	n/a	13574.1	0.744	7.25	0.073	1.04	0.0014	2.96	0.0039	18	0.29	44	14.67	5.57	2.28	90.2	0	70.82	1.48649
E9Q4E0-F1	AF-E9Q4E0-F1-model_v1	ALPHAFOLD V2.0 PREDICTION FOR RIKEN CDNA 5031410I06 GENE (E9Q4E0)	MOL_ID: 1; ORGANISM_SCIENTIFIC: MUS MUSCULUS; ORGANISM_TAXID: 10090	01-JUL-21	12-OCT-21	n/a	31504.3	0.726	4.43	0.045	1.58	0.0021	4.84	0.0066	33.4	0.53	71.9	25.02	5.31	4.12	67.7	0	74.03	1.48554
Q91ZY6-F1	AF-Q91ZY6-F1-model_v1	ALPHAFOLD V2.0 PREDICTION FOR HOMOLOGOUS-PAIRING PROTEIN 2 HOMOLOG (Q91ZY6)	MOL_ID: 1; ORGANISM_SCIENTIFIC: RATTUS NORVEGICUS; ORGANISM_TAXID: 10116	01-JUL-21	12-OCT-21	n/a	24774	0.732	5.65	0.057	1.55	0.0019	3.79	0.0048	19	0.3	56.3	15.4	7.23	4.63	68.1	4.6	92.18	1.48549
Q9ZQ87-F1	AF-Q9ZQ87-F1-model_v1	ALPHAFOLD V2.0 PREDICTION FOR EXPRESSED PROTEIN (Q9ZQ87)	MOL_ID: 1; ORGANISM_SCIENTIFIC: ARABIDOPSIS THALIANA; ORGANISM_TAXID: 3702	01-JUL-21	12-OCT-21	n/a	40595.2	0.74	4.16	0.042	1.81	0.0027	5.15	0.0077	36.5	0.59	76.5	29.36	6.29	5.34	56.3	12.1	84.13	1.48544
Q9NX63-F1	AF-Q9NX63-F1-model_v1	ALPHAFOLD V2.0 PREDICTION FOR MICOS COMPLEX SUBUNIT MIC19 (Q9NX63)	MOL_ID: 1; ORGANISM_SCIENTIFIC: HOMO SAPIENS; ORGANISM_TAXID: 9606	01-JUL-21	12-OCT-21	n/a	26156.6	0.724	4.93	0.05	1.47	0.0019	4.35	0.0055	27.9	0.44	64.6	20.55	7.46	5.24	68.6	2.6	84.7	1.48506
Q9GRZ9-F1	AF-Q9GRZ9-F1-model_v1	ALPHAFOLD V2.0 PREDICTION FOR TRANSMEMBRANE AND COILED-COIL PROTEIN (Q9GRZ9)	MOL_ID: 1; ORGANISM_SCIENTIFIC: CAENORHABDITIS ELEGANS; ORGANISM_TAXID: 6239	01-JUL-21	12-OCT-21	n/a	75903.3	0.737	2.7	0.027	2.22	0.0032	7.95	0.012	65.3	1.05	118	46.85	11.6	7.43	70.2	0	72.03	1.48428
A0A0P0XLZ9-F1	AF-A0A0P0XLZ9-F1-model_v1	ALPHAFOLD V2.0 PREDICTION FOR OS09G0400900 PROTEIN (A0A0P0XLZ9)	MOL_ID: 1; ORGANISM_SCIENTIFIC: ORYZA SATIVA SUBSP. JAPONICA; ORGANISM_TAXID: 39947	01-JUL-21	12-OCT-21	n/a	4696.2	0.698	9.69	0.098	0.566	0.00077	2.21	0.003	22.2	0.35	32.8	11.73	2.42	2.22	15	0	66.03	1.48416
Q9LNX4-F1	AF-Q9LNX4-F1-model_v1	ALPHAFOLD V2.0 PREDICTION FOR CYCLIN-DEPENDENT PROTEIN KINASE INHIBITOR SMR5 (Q9LNX4)	MOL_ID: 1; ORGANISM_SCIENTIFIC: ARABIDOPSIS THALIANA; ORGANISM_TAXID: 3702	01-JUL-21	12-OCT-21	n/a	9212.5	0.723	7.15	0.072	0.752	0.00098	3	0.0039	26.5	0.42	44.5	12.96	7.33	2.24	22.2	0	77.96	1.48333
Q9BWT6-F1	AF-Q9BWT6-F1-model_v1	ALPHAFOLD V2.0 PREDICTION FOR MEIOTIC NUCLEAR DIVISION PROTEIN 1 HOMOLOG (Q9BWT6)	MOL_ID: 1; ORGANISM_SCIENTIFIC: HOMO SAPIENS; ORGANISM_TAXID: 9606	01-JUL-21	12-OCT-21	n/a	23759.3	0.736	5.74	0.058	1.48	0.0019	3.73	0.0047	19.6	0.31	55.3	17.09	7.09	4.18	70.6	3.9	90.88	1.48257
Q8N8E3-F1	AF-Q8N8E3-F1-model_v1	ALPHAFOLD V2.0 PREDICTION FOR CENTROSOMAL PROTEIN OF 112 KDA (Q8N8E3)	MOL_ID: 1; ORGANISM_SCIENTIFIC: HOMO SAPIENS; ORGANISM_TAXID: 9606	01-JUL-21	12-OCT-21	n/a	112761	0.733	2.37	0.024	2.94	0.0042	9.04	0.013	65.3	1.05	134	50.29	13.17	8.19	79.5	0	76.09	1.4823
F6YUL9-F1	AF-F6YUL9-F1-model_v1	ALPHAFOLD V2.0 PREDICTION FOR PREDICTED GENE, 21961 (F6YUL9)	MOL_ID: 1; ORGANISM_SCIENTIFIC: MUS MUSCULUS; ORGANISM_TAXID: 10090	01-JUL-21	12-OCT-21	n/a	4558.8	0.693	11.2	0.11	0.648	0.00088	1.91	0.0026	14.5	0.23	28.3	10.07	1.8	1.66	29.7	0	79.58	1.48168
Q8K305-F1	AF-Q8K305-F1-model_v1	ALPHAFOLD V2.0 PREDICTION FOR KINETOCHORE-ASSOCIATED PROTEIN NSL1 HOMOLOG (Q8K305)	MOL_ID: 1; ORGANISM_SCIENTIFIC: MUS MUSCULUS; ORGANISM_TAXID: 10090	01-JUL-21	12-OCT-21	n/a	31740.5	0.736	4.42	0.045	1.53	0.002	4.84	0.0063	30.6	0.48	71.7	23.6	8.6	6.14	51.8	1.4	77.05	1.4814
P0DM65-F1	AF-P0DM65-F1-model_v1	ALPHAFOLD V2.0 PREDICTION FOR BECLIN-2 (P0DM65)	MOL_ID: 1; ORGANISM_SCIENTIFIC: MUS MUSCULUS; ORGANISM_TAXID: 10090	01-JUL-21	12-OCT-21	n/a	50271.2	0.73	4.26	0.043	2.39	0.0029	5.03	0.0061	21.2	0.33	74.5	21.5	7.66	8.28	49.1	5.4	73.34	1.48111
A4ID46-F1	AF-A4ID46-F1-model_v1	ALPHAFOLD V2.0 PREDICTION FOR HYPOTHETICAL_PROTEIN_-_CONSERVED (A4ID46)	MOL_ID: 1; ORGANISM_SCIENTIFIC: LEISHMANIA INFANTUM; ORGANISM_TAXID: 5671	01-JUL-21	12-OCT-21	n/a	20322.1	0.739	5.39	0.054	1.18	0.0015	3.97	0.0052	29	0.46	58.8	19.29	7.84	4.5	59	0	73.39	1.48111
Q8WWG1-F1	AF-Q8WWG1-F1-model_v1	ALPHAFOLD V2.0 PREDICTION FOR PRO-NEUREGULIN-4, MEMBRANE-BOUND ISOFORM (Q8WWG1)	MOL_ID: 1; ORGANISM_SCIENTIFIC: HOMO SAPIENS; ORGANISM_TAXID: 9606	01-JUL-21	12-OCT-21	n/a	12716.9	0.728	7.73	0.078	1.1	0.0015	2.77	0.0037	15.9	0.25	41	13.85	3.93	2.66	54.4	3.5	78.66	1.48014
O94905-F1	AF-O94905-F1-model_v1	ALPHAFOLD V2.0 PREDICTION FOR ERLIN-2 (O94905)	MOL_ID: 1; ORGANISM_SCIENTIFIC: HOMO SAPIENS; ORGANISM_TAXID: 9606	01-JUL-21	12-OCT-21	n/a	37836.5	0.745	4.6	0.046	1.83	0.0025	4.66	0.0063	25.3	0.4	68.9	22.88	7.25	5.47	55.3	12.7	85.18	1.47854
D3ZLI4-F1	AF-D3ZLI4-F1-model_v1	ALPHAFOLD V2.0 PREDICTION FOR IQ DOMAIN-CONTAINING PROTEIN F5-LIKE (D3ZLI4)	MOL_ID: 1; ORGANISM_SCIENTIFIC: RATTUS NORVEGICUS; ORGANISM_TAXID: 10116	01-JUL-21	12-OCT-21	n/a	23447	0.74	5.39	0.054	1.36	0.0018	3.97	0.0053	25.1	0.4	58.6	19.55	6.15	4.59	58.1	13.1	79.83	1.47607
P87169-F1	AF-P87169-F1-model_v1	ALPHAFOLD V2.0 PREDICTION FOR SPINDLE ASSEMBLY CHECKPOINT COMPONENT MAD1 (P87169)	MOL_ID: 1; ORGANISM_SCIENTIFIC: SCHIZOSACCHAROMYCES POMBE (STRAIN 972 / ATCC 24843); ORGANISM_TAXID: 284812	01-JUL-21	12-OCT-21	n/a	79889.9	0.738	2.72	0.028	2.35	0.0033	7.86	0.011	56.7	0.91	116	43.53	11.44	8.06	71.8	2.3	77.54	1.47583
Q96RD9-F1	AF-Q96RD9-F1-model_v1	ALPHAFOLD V2.0 PREDICTION FOR FC RECEPTOR-LIKE PROTEIN 5 (Q96RD9)	MOL_ID: 1; ORGANISM_SCIENTIFIC: HOMO SAPIENS; ORGANISM_TAXID: 9606	01-JUL-21	12-OCT-21	1-15	104829	0.731	3.13	0.032	3.64	0.0049	6.85	0.0092	27.5	0.44	101	35.9	9.57	8.74	2.8	34.5	76.79	1.47445
A0A1D6N0N7-F1	AF-A0A1D6N0N7-F1-model_v1	ALPHAFOLD V2.0 PREDICTION FOR UNCHARACTERIZED PROTEIN (A0A1D6N0N7)	MOL_ID: 1; ORGANISM_SCIENTIFIC: ZEA MAYS; ORGANISM_TAXID: 4577	01-JUL-21	12-OCT-21	n/a	13479.1	0.747	7.31	0.074	1.03	0.0013	2.93	0.0038	17.3	0.27	43.2	14.85	4.14	3.09	82.6	0	84.81	1.4744
Q9NRJ7-F1	AF-Q9NRJ7-F1-model_v1	ALPHAFOLD V2.0 PREDICTION FOR PROTOCADHERIN BETA-16 (Q9NRJ7)	MOL_ID: 1; ORGANISM_SCIENTIFIC: HOMO SAPIENS; ORGANISM_TAXID: 9606	01-JUL-21	12-OCT-21	1-28	81767.3	0.737	3.65	0.037	3.23	0.0042	5.87	0.0077	22.6	0.36	86.5	29.11	11.15	6.61	7.5	30.8	84.32	1.47359
P10567-F1	AF-P10567-F1-model_v1	ALPHAFOLD V2.0 PREDICTION FOR PARAMYOSIN (P10567)	MOL_ID: 1; ORGANISM_SCIENTIFIC: CAENORHABDITIS ELEGANS; ORGANISM_TAXID: 6239	01-JUL-21	12-OCT-21	n/a	100621	0.732	2.39	0.024	2.66	0.0037	8.96	0.012	70.3	1.13	132	49.53	14.95	8.16	90.4	0	78.55	1.47321
Q0DIC8-F1	AF-Q0DIC8-F1-model_v1	ALPHAFOLD V2.0 PREDICTION FOR OS05G0400500 PROTEIN (Q0DIC8)	MOL_ID: 1; ORGANISM_SCIENTIFIC: ORYZA SATIVA SUBSP. JAPONICA; ORGANISM_TAXID: 39947	01-JUL-21	12-OCT-21	n/a	7333.2	0.736	8.36	0.084	0.667	0.00091	2.56	0.0035	22.1	0.35	37.7	13.37	3.57	2.54	41.2	0	73.04	1.47266
Q9BS16-F1	AF-Q9BS16-F1-model_v1	ALPHAFOLD V2.0 PREDICTION FOR CENTROMERE PROTEIN K (Q9BS16)	MOL_ID: 1; ORGANISM_SCIENTIFIC: HOMO SAPIENS; ORGANISM_TAXID: 9606	01-JUL-21	12-OCT-21	n/a	31642.1	0.74	4.91	0.05	1.67	0.0022	4.36	0.0057	23.8	0.38	64.2	21.04	8.14	4.54	64.9	1.5	81.1	1.47248
Q4E4W3-F1	AF-Q4E4W3-F1-model_v1	ALPHAFOLD V2.0 PREDICTION FOR FYVE-TYPE DOMAIN-CONTAINING PROTEIN (Q4E4W3)	MOL_ID: 1; ORGANISM_SCIENTIFIC: TRYPANOSOMA CRUZI (STRAIN CL BRENER); ORGANISM_TAXID: 353153	01-JUL-21	12-OCT-21	n/a	39314.6	0.723	4.54	0.046	2.04	0.0027	4.72	0.0063	24.5	0.39	69.5	23.55	7.78	3.85	56.8	0	86.9	1.47246
F1R122-F1	AF-F1R122-F1-model_v1	ALPHAFOLD V2.0 PREDICTION FOR HOMOLOGOUS-PAIRING PROTEIN 2 HOMOLOG (F1R122)	MOL_ID: 1; ORGANISM_SCIENTIFIC: DANIO RERIO; ORGANISM_TAXID: 7955	01-JUL-21	12-OCT-21	n/a	24442	0.733	5.77	0.058	1.55	0.0019	3.71	0.0046	18	0.28	54.6	16.13	6.39	4.93	67.9	4.7	93.25	1.4717
Q96PL5-F1	AF-Q96PL5-F1-model_v1	ALPHAFOLD V2.0 PREDICTION FOR ERYTHROID MEMBRANE-ASSOCIATED PROTEIN (Q96PL5)	MOL_ID: 1; ORGANISM_SCIENTIFIC: HOMO SAPIENS; ORGANISM_TAXID: 9606	01-JUL-21	12-OCT-21	1-29	49590.3	0.744	4.61	0.046	2.41	0.0031	4.65	0.0059	17.6	0.28	68.4	20.05	7.63	6.72	21.1	22.2	83.18	1.47097
Q54CZ6-F1	AF-Q54CZ6-F1-model_v1	ALPHAFOLD V2.0 PREDICTION FOR PUTATIVE UNCHARACTERIZED PROTEIN DDB_G0292614 (Q54CZ6)	MOL_ID: 1; ORGANISM_SCIENTIFIC: DICTYOSTELIUM DISCOIDEUM; ORGANISM_TAXID: 44689	01-JUL-21	12-OCT-21	n/a	10800.2	0.737	7.83	0.079	0.917	0.0012	2.74	0.0037	18.2	0.29	40.3	13.78	3.4	2.31	81.5	0	89.17	1.4708
A0A1D6HXY3-F1	AF-A0A1D6HXY3-F1-model_v1	ALPHAFOLD V2.0 PREDICTION FOR UNCHARACTERIZED PROTEIN (A0A1D6HXY3)	MOL_ID: 1; ORGANISM_SCIENTIFIC: ZEA MAYS; ORGANISM_TAXID: 4577	01-JUL-21	12-OCT-21	n/a	10890	0.734	7.87	0.079	0.94	0.0013	2.72	0.0037	17.5	0.28	40	14.19	2.88	2.56	97.8	0	97.63	1.47059
Q9C8T4-F1	AF-Q9C8T4-F1-model_v1	ALPHAFOLD V2.0 PREDICTION FOR MYOSIN HEAVY CHAIN-RELATED PROTEIN (Q9C8T4)	MOL_ID: 1; ORGANISM_SCIENTIFIC: ARABIDOPSIS THALIANA; ORGANISM_TAXID: 3702	01-JUL-21	12-OCT-21	n/a	118419	0.729	2.19	0.022	2.89	0.0042	9.8	0.014	78.7	1.27	144	58.32	12.55	11.77	65	5.1	73.22	1.46939
A0A1P8AVM4-F1	AF-A0A1P8AVM4-F1-model_v1	ALPHAFOLD V2.0 PREDICTION FOR MUTATOR-LIKE TRANSPOSASE (A0A1P8AVM4)	MOL_ID: 1; ORGANISM_SCIENTIFIC: ARABIDOPSIS THALIANA; ORGANISM_TAXID: 3702	01-JUL-21	12-OCT-21	n/a	10090.9	0.738	8.38	0.085	0.914	0.0012	2.56	0.0035	16	0.25	37.6	13.48	2.44	2.27	97.6	0	95.78	1.46875
Q7YTK3-F1	AF-Q7YTK3-F1-model_v1	ALPHAFOLD V2.0 PREDICTION FOR UNCHARACTERIZED PROTEIN (Q7YTK3)	MOL_ID: 1; ORGANISM_SCIENTIFIC: CAENORHABDITIS ELEGANS; ORGANISM_TAXID: 6239	01-JUL-21	12-OCT-21	n/a	10727.4	0.759	7.48	0.076	0.798	0.0011	2.86	0.004	22.1	0.35	42	15.97	3.09	2.46	69.9	0	75.63	1.46853
A4I7G5-F1	AF-A4I7G5-F1-model_v1	ALPHAFOLD V2.0 PREDICTION FOR NUCLEAR_SEGREGATION_PROTEIN_-_PUTATIVE (A4I7G5)	MOL_ID: 1; ORGANISM_SCIENTIFIC: LEISHMANIA INFANTUM; ORGANISM_TAXID: 5671	01-JUL-21	12-OCT-21	n/a	56372.3	0.727	3.72	0.038	2.36	0.0032	5.76	0.0077	30.9	0.49	84.5	28.15	8.57	6.56	67.1	0	78.06	1.46701
G3V9G0-F1	AF-G3V9G0-F1-model_v1	ALPHAFOLD V2.0 PREDICTION FOR PROTOCADHERIN BETA 21 (G3V9G0)	MOL_ID: 1; ORGANISM_SCIENTIFIC: RATTUS NORVEGICUS; ORGANISM_TAXID: 10116	01-JUL-21	12-OCT-21	n/a	82843.2	0.741	3.57	0.036	3.16	0.0041	6	0.0077	24.2	0.38	88	29.01	9	6.57	7.3	30.8	83.83	1.46667
Q86VW0-F1	AF-Q86VW0-F1-model_v1	ALPHAFOLD V2.0 PREDICTION FOR SEC14 DOMAIN AND SPECTRIN REPEAT-CONTAINING PROTEIN 1 (Q86VW0)	MOL_ID: 1; ORGANISM_SCIENTIFIC: HOMO SAPIENS; ORGANISM_TAXID: 9606	01-JUL-21	12-OCT-21	n/a	79332.6	0.737	4.06	0.041	3.49	0.0046	5.28	0.0069	17.3	0.27	77.4	26.75	7.92	5.24	69.9	3.2	85.76	1.46591
Q6UX41-F1	AF-Q6UX41-F1-model_v1	ALPHAFOLD V2.0 PREDICTION FOR BUTYROPHILIN-LIKE PROTEIN 8 (Q6UX41)	MOL_ID: 1; ORGANISM_SCIENTIFIC: HOMO SAPIENS; ORGANISM_TAXID: 9606	01-JUL-21	12-OCT-21	1-17	55029.9	0.732	4.8	0.048	2.92	0.0037	4.47	0.0056	13.8	0.22	65.5	19.96	6.36	6.14	15.2	31.1	87.26	1.46532
Q4CTC2-F1	AF-Q4CTC2-F1-model_v1	ALPHAFOLD V2.0 PREDICTION FOR UNCHARACTERIZED PROTEIN (Q4CTC2)	MOL_ID: 1; ORGANISM_SCIENTIFIC: TRYPANOSOMA CRUZI (STRAIN CL BRENER); ORGANISM_TAXID: 353153	01-JUL-21	12-OCT-21	n/a	16567.2	0.751	6.25	0.063	1.06	0.0014	3.43	0.0044	21.9	0.34	50.2	16.29	5.43	4.2	76.5	0	78.9	1.46356
Q9Y5E8-F1	AF-Q9Y5E8-F1-model_v1	ALPHAFOLD V2.0 PREDICTION FOR PROTOCADHERIN BETA-15 (Q9Y5E8)	MOL_ID: 1; ORGANISM_SCIENTIFIC: HOMO SAPIENS; ORGANISM_TAXID: 9606	01-JUL-21	12-OCT-21	1-26	83343.1	0.735	3.57	0.036	3.25	0.0043	6	0.0079	23.5	0.37	87.8	29.11	9.06	7.36	6.7	30.9	83.37	1.46333
B6TWD2-F1	AF-B6TWD2-F1-model_v1	ALPHAFOLD V2.0 PREDICTION FOR AUGMIN SUBUNIT 1 (B6TWD2)	MOL_ID: 1; ORGANISM_SCIENTIFIC: ZEA MAYS; ORGANISM_TAXID: 4577	01-JUL-21	12-OCT-21	n/a	33382.4	0.736	4.64	0.047	1.69	0.0021	4.62	0.0058	26	0.41	67.6	21.48	8.65	6.42	79	0	84.02	1.4632
Q54P45-F1	AF-Q54P45-F1-model_v1	ALPHAFOLD V2.0 PREDICTION FOR PUTATIVE UNCHARACTERIZED TRANSMEMBRANE PROTEIN DDB_G0284827 (Q54P45)	MOL_ID: 1; ORGANISM_SCIENTIFIC: DICTYOSTELIUM DISCOIDEUM; ORGANISM_TAXID: 44689	01-JUL-21	12-OCT-21	n/a	7449.2	0.768	8.77	0.088	0.625	0.00081	2.44	0.0032	17.5	0.28	35.7	11.55	3.29	2.5	56.7	0	80.17	1.46311
Q2FV78-F1	AF-Q2FV78-F1-model_v1	ALPHAFOLD V2.0 PREDICTION FOR UNCHARACTERIZED PROTEIN (Q2FV78)	MOL_ID: 1; ORGANISM_SCIENTIFIC: STAPHYLOCOCCUS AUREUS (STRAIN NCTC 8325 / PS 47); ORGANISM_TAXID: 93061	01-JUL-21	12-OCT-21	n/a	10184.8	0.75	8.35	0.084	0.877	0.0012	2.57	0.0034	15.7	0.25	37.6	13.26	2.52	2.3	97.6	0	94.15	1.46304
A0A0G2KVY0-F1	AF-A0A0G2KVY0-F1-model_v1	ALPHAFOLD V2.0 PREDICTION FOR UNCHARACTERIZED PROTEIN (A0A0G2KVY0)	MOL_ID: 1; ORGANISM_SCIENTIFIC: DANIO RERIO; ORGANISM_TAXID: 7955	01-JUL-21	12-OCT-21	n/a	41767.1	0.751	4.53	0.046	1.94	0.0027	4.73	0.0065	24.3	0.39	69.2	25.14	7.97	4.34	88.1	0	59.59	1.463
Q2G166-F1	AF-Q2G166-F1-model_v1	ALPHAFOLD V2.0 PREDICTION FOR UNCHARACTERIZED PROTEIN (Q2G166)	MOL_ID: 1; ORGANISM_SCIENTIFIC: STAPHYLOCOCCUS AUREUS (STRAIN NCTC 8325 / PS 47); ORGANISM_TAXID: 93061	01-JUL-21	12-OCT-21	n/a	5298.5	0.753	9.93	0.1	0.536	0.00072	2.16	0.0029	17.7	0.28	31.6	11.03	2.83	2.04	0	8.9	62.18	1.46296
Q8N3L3-F1	AF-Q8N3L3-F1-model_v1	ALPHAFOLD V2.0 PREDICTION FOR BETA-TAXILIN (Q8N3L3)	MOL_ID: 1; ORGANISM_SCIENTIFIC: HOMO SAPIENS; ORGANISM_TAXID: 9606	01-JUL-21	12-OCT-21	n/a	76487.8	0.725	2.65	0.027	2.3	0.0032	8.08	0.011	64.2	1.03	118	45.7	11.31	10.78	51.5	0	66.91	1.4604
Q9Y5F0-F1	AF-Q9Y5F0-F1-model_v1	ALPHAFOLD V2.0 PREDICTION FOR PROTOCADHERIN BETA-13 (Q9Y5F0)	MOL_ID: 1; ORGANISM_SCIENTIFIC: HOMO SAPIENS; ORGANISM_TAXID: 9606	01-JUL-21	12-OCT-21	1-28	84523.4	0.737	3.55	0.036	3.25	0.0044	6.04	0.0081	24.2	0.39	88	29.8	11.05	6.67	7.2	30.4	82.25	1.45695
Q9NY87-F1	AF-Q9NY87-F1-model_v1	ALPHAFOLD V2.0 PREDICTION FOR SPERM PROTEIN ASSOCIATED WITH THE NUCLEUS ON THE X CHROMOSOME C (Q9NY87)	MOL_ID: 1; ORGANISM_SCIENTIFIC: HOMO SAPIENS; ORGANISM_TAXID: 9606	01-JUL-21	12-OCT-21	n/a	10981.1	0.721	6.84	0.069	0.864	0.0011	3.13	0.004	25.5	0.4	45.6	13.14	7.47	2.94	4.2	22.9	69	1.45687
Q9Y5E7-F1	AF-Q9Y5E7-F1-model_v1	ALPHAFOLD V2.0 PREDICTION FOR PROTOCADHERIN BETA-2 (Q9Y5E7)	MOL_ID: 1; ORGANISM_SCIENTIFIC: HOMO SAPIENS; ORGANISM_TAXID: 9606	01-JUL-21	12-OCT-21	1-30	83929.7	0.738	3.54	0.036	3.21	0.0042	6.05	0.0079	24	0.38	88.1	29.2	9.42	6.84	7	30.6	82.92	1.4562
Q9P1Z2-F1	AF-Q9P1Z2-F1-model_v1	ALPHAFOLD V2.0 PREDICTION FOR CALCIUM-BINDING AND COILED-COIL DOMAIN-CONTAINING PROTEIN 1 (Q9P1Z2)	MOL_ID: 1; ORGANISM_SCIENTIFIC: HOMO SAPIENS; ORGANISM_TAXID: 9606	01-JUL-21	12-OCT-21	n/a	77302.5	0.729	3.15	0.032	2.72	0.0034	6.81	0.0085	35.3	0.55	99.1	31.46	11.07	8.02	56.2	6.4	75.8	1.45521
C0P9D4-F1	AF-C0P9D4-F1-model_v1	ALPHAFOLD V2.0 PREDICTION FOR UNCHARACTERIZED PROTEIN (C0P9D4)	MOL_ID: 1; ORGANISM_SCIENTIFIC: ZEA MAYS; ORGANISM_TAXID: 4577	01-JUL-21	12-OCT-21	n/a	19755.5	0.728	5.54	0.056	1.23	0.0016	3.87	0.0052	26.9	0.43	56.3	19.1	7.59	3.28	76.3	0	81.62	1.45478
I6YC99-F1	AF-I6YC99-F1-model_v1	ALPHAFOLD V2.0 PREDICTION FOR MCE-FAMILY PROTEIN MCE4A (I6YC99)	MOL_ID: 1; ORGANISM_SCIENTIFIC: MYCOBACTERIUM TUBERCULOSIS (STRAIN ATCC 25618 / H37RV); ORGANISM_TAXID: 83332	01-JUL-21	12-OCT-21	n/a	42424.4	0.741	4.22	0.043	1.91	0.0026	5.08	0.0068	28	0.45	73.9	26.59	8.88	5.6	47.9	10.3	85.42	1.45472
Q6ZP65-F1	AF-Q6ZP65-F1-model_v1	ALPHAFOLD V2.0 PREDICTION FOR BICD FAMILY-LIKE CARGO ADAPTER 1 (Q6ZP65)	MOL_ID: 1; ORGANISM_SCIENTIFIC: HOMO SAPIENS; ORGANISM_TAXID: 9606	01-JUL-21	12-OCT-21	n/a	64817.7	0.728	3.14	0.032	2.29	0.0031	6.81	0.0094	45.5	0.73	99	36.94	7.12	8.73	71.8	0	75.44	1.45374
Q9NSB8-F1	AF-Q9NSB8-F1-model_v1	ALPHAFOLD V2.0 PREDICTION FOR HOMER PROTEIN HOMOLOG 2 (Q9NSB8)	MOL_ID: 1; ORGANISM_SCIENTIFIC: HOMO SAPIENS; ORGANISM_TAXID: 9606	01-JUL-21	12-OCT-21	n/a	40630.8	0.727	4.15	0.042	1.9	0.0027	5.16	0.0075	35.3	0.57	75	31.06	6.43	4.77	63.5	12.8	88.27	1.45349
A8JUT0-F1	AF-A8JUT0-F1-model_v1	ALPHAFOLD V2.0 PREDICTION FOR INAF-A (A8JUT0)	MOL_ID: 1; ORGANISM_SCIENTIFIC: DROSOPHILA MELANOGASTER; ORGANISM_TAXID: 7227	01-JUL-21	12-OCT-21	n/a	10062.7	0.745	7.19	0.073	0.761	0.0011	2.98	0.0042	26.3	0.42	43.3	15.9	3.84	2.8	37.5	0	65.87	1.45302
F1M923-F1	AF-F1M923-F1-model_v1	ALPHAFOLD V2.0 PREDICTION FOR UNCHARACTERIZED PROTEIN (F1M923)	MOL_ID: 1; ORGANISM_SCIENTIFIC: RATTUS NORVEGICUS; ORGANISM_TAXID: 10116	01-JUL-21	12-OCT-21	n/a	8606.1	0.721	6.78	0.068	0.671	0.00089	3.16	0.0042	34.2	0.54	45.9	15.46	7.5	3.3	11	0	65.17	1.45253
A0A0R0EJE8-F1	AF-A0A0R0EJE8-F1-model_v1	ALPHAFOLD V2.0 PREDICTION FOR UNCHARACTERIZED PROTEIN (A0A0R0EJE8)	MOL_ID: 1; ORGANISM_SCIENTIFIC: GLYCINE MAX; ORGANISM_TAXID: 3847	01-JUL-21	12-OCT-21	n/a	10531.3	0.753	8.21	0.083	0.881	0.0012	2.61	0.0034	15.5	0.25	37.9	12.62	3.88	2.61	82.6	0	81.59	1.45211
Q09578-F1	AF-Q09578-F1-model_v1	ALPHAFOLD V2.0 PREDICTION FOR PUTATIVE CUTICLE COLLAGEN 75 (Q09578)	MOL_ID: 1; ORGANISM_SCIENTIFIC: CAENORHABDITIS ELEGANS; ORGANISM_TAXID: 6239	01-JUL-21	12-OCT-21	n/a	30108.2	0.733	4.57	0.046	1.51	0.0022	4.69	0.0068	35.8	0.58	68.1	27.35	8.02	3.99	25	0	54.06	1.45203
A0A0P0XZA6-F1	AF-A0A0P0XZA6-F1-model_v1	ALPHAFOLD V2.0 PREDICTION FOR OS11G0152600 PROTEIN (A0A0P0XZA6)	MOL_ID: 1; ORGANISM_SCIENTIFIC: ORYZA SATIVA SUBSP. JAPONICA; ORGANISM_TAXID: 39947	01-JUL-21	12-OCT-21	n/a	4165.7	0.737	10.9	0.11	0.491	0.00068	1.97	0.0027	17.8	0.28	28.6	10.4	2.43	1.76	5.1	0	72.6	1.45178
D4A1B8-F1	AF-D4A1B8-F1-model_v1	ALPHAFOLD V2.0 PREDICTION FOR DYNACTIN SUBUNIT 3 (D4A1B8)	MOL_ID: 1; ORGANISM_SCIENTIFIC: RATTUS NORVEGICUS; ORGANISM_TAXID: 10116	01-JUL-21	12-OCT-21	n/a	21113.1	0.75	5.65	0.057	1.23	0.0017	3.79	0.0051	24	0.38	55	19.15	7.92	3.35	82.7	0	87.93	1.45119
Q9LFE4-F1	AF-Q9LFE4-F1-model_v1	ALPHAFOLD V2.0 PREDICTION FOR WEB FAMILY PROTEIN AT5G16730, CHLOROPLASTIC (Q9LFE4)	MOL_ID: 1; ORGANISM_SCIENTIFIC: ARABIDOPSIS THALIANA; ORGANISM_TAXID: 3702	01-JUL-21	12-OCT-21	n/a	96168.5	0.732	2.25	0.023	2.39	0.0034	9.51	0.013	84.2	1.35	138	54.48	13.67	10.57	66.3	0	71.11	1.4511
A0A1D6KR19-F1	AF-A0A1D6KR19-F1-model_v1	ALPHAFOLD V2.0 PREDICTION FOR UNCHARACTERIZED PROTEIN (A0A1D6KR19)	MOL_ID: 1; ORGANISM_SCIENTIFIC: ZEA MAYS; ORGANISM_TAXID: 4577	01-JUL-21	12-OCT-21	n/a	7231.3	0.699	8.4	0.085	0.753	0.00099	2.55	0.0034	20.8	0.33	37	11.94	5.22	3.52	12.9	0	64.49	1.45098
I1LAW4-F1	AF-I1LAW4-F1-model_v1	ALPHAFOLD V2.0 PREDICTION FOR UNCHARACTERIZED PROTEIN (I1LAW4)	MOL_ID: 1; ORGANISM_SCIENTIFIC: GLYCINE MAX; ORGANISM_TAXID: 3847	01-JUL-21	12-OCT-21	n/a	15503.7	0.727	6.39	0.064	1.11	0.0015	3.35	0.0045	22.6	0.36	48.6	17.48	4.11	2.99	77.4	0	80.33	1.45075
Q9VYB1-F1	AF-Q9VYB1-F1-model_v1	ALPHAFOLD V2.0 PREDICTION FOR LD33040P (Q9VYB1)	MOL_ID: 1; ORGANISM_SCIENTIFIC: DROSOPHILA MELANOGASTER; ORGANISM_TAXID: 7227	01-JUL-21	12-OCT-21	n/a	77899.3	0.732	2.73	0.028	2.35	0.0034	7.86	0.011	64.9	1.05	114	45.66	12.48	10.21	65.4	0	75.34	1.45038
Q9W3V2-F1	AF-Q9W3V2-F1-model_v1	ALPHAFOLD V2.0 PREDICTION FOR FI19713P1 (Q9W3V2)	MOL_ID: 1; ORGANISM_SCIENTIFIC: DROSOPHILA MELANOGASTER; ORGANISM_TAXID: 7227	01-JUL-21	12-OCT-21	n/a	103782	0.726	2.14	0.022	2.51	0.0036	10	0.014	89.6	1.45	145	58.49	17.46	12	57.6	0	66.81	1.45
P24539-F1	AF-P24539-F1-model_v1	ALPHAFOLD V2.0 PREDICTION FOR ATP SYNTHASE F(0) COMPLEX SUBUNIT B1, MITOCHONDRIAL (P24539)	MOL_ID: 1; ORGANISM_SCIENTIFIC: HOMO SAPIENS; ORGANISM_TAXID: 9606	01-JUL-21	12-OCT-21	n/a	28922.8	0.748	4.82	0.049	1.45	0.0018	4.45	0.0055	26.8	0.42	64.5	20.96	9.39	5.33	69.8	0	82.9	1.44944
E9Q058-F1	AF-E9Q058-F1-model_v1	ALPHAFOLD V2.0 PREDICTION FOR PREDICTED GENE 3095 (E9Q058)	MOL_ID: 1; ORGANISM_SCIENTIFIC: MUS MUSCULUS; ORGANISM_TAXID: 10090	01-JUL-21	12-OCT-21	n/a	20050.8	0.721	5.23	0.053	1.21	0.0017	4.1	0.0057	35.5	0.57	59.4	22.98	5.06	3.13	63.6	0	71.72	1.44878
K7KFS8-F1	AF-K7KFS8-F1-model_v1	ALPHAFOLD V2.0 PREDICTION FOR UNCHARACTERIZED PROTEIN (K7KFS8)	MOL_ID: 1; ORGANISM_SCIENTIFIC: GLYCINE MAX; ORGANISM_TAXID: 3847	01-JUL-21	12-OCT-21	n/a	5854.4	0.738	8.52	0.086	0.539	0.00074	2.52	0.0035	25.6	0.41	36.5	12.72	5.68	2.5	0	0	78.75	1.44841
K7LZU1-F1	AF-K7LZU1-F1-model_v1	ALPHAFOLD V2.0 PREDICTION FOR VPS37 C-TERMINAL DOMAIN-CONTAINING PROTEIN (K7LZU1)	MOL_ID: 1; ORGANISM_SCIENTIFIC: GLYCINE MAX; ORGANISM_TAXID: 3847	01-JUL-21	12-OCT-21	n/a	21843.7	0.734	6.16	0.062	1.48	0.0019	3.48	0.0045	16.5	0.26	50.4	16.86	4.32	3.31	75.9	0	87.25	1.44828
O75264-F1	AF-O75264-F1-model_v1	ALPHAFOLD V2.0 PREDICTION FOR SMALL INTEGRAL MEMBRANE PROTEIN 24 (O75264)	MOL_ID: 1; ORGANISM_SCIENTIFIC: HOMO SAPIENS; ORGANISM_TAXID: 9606	01-JUL-21	12-OCT-21	1-20	12823.9	0.735	6.53	0.066	0.915	0.0013	3.28	0.0045	27.2	0.43	47.5	17.07	5.72	2.82	72.5	0	65.89	1.44817
Q9Y5E5-F1	AF-Q9Y5E5-F1-model_v1	ALPHAFOLD V2.0 PREDICTION FOR PROTOCADHERIN BETA-4 (Q9Y5E5)	MOL_ID: 1; ORGANISM_SCIENTIFIC: HOMO SAPIENS; ORGANISM_TAXID: 9606	01-JUL-21	12-OCT-21	1-27	84059.1	0.739	3.63	0.037	3.29	0.0043	5.9	0.0077	21.8	0.34	85.4	29.03	8.89	7.44	6.7	29.6	83.5	1.44746
A0A0P0W524-F1	AF-A0A0P0W524-F1-model_v1	ALPHAFOLD V2.0 PREDICTION FOR OS03G0818000 PROTEIN (A0A0P0W524)	MOL_ID: 1; ORGANISM_SCIENTIFIC: ORYZA SATIVA SUBSP. JAPONICA; ORGANISM_TAXID: 39947	01-JUL-21	12-OCT-21	n/a	40589.8	0.732	3.99	0.04	1.79	0.0025	5.37	0.0075	37.3	0.59	77.7	29.41	6.88	5.02	65.9	0	73.09	1.44693
I1K2P1-F1	AF-I1K2P1-F1-model_v1	ALPHAFOLD V2.0 PREDICTION FOR UNCHARACTERIZED PROTEIN (I1K2P1)	MOL_ID: 1; ORGANISM_SCIENTIFIC: GLYCINE MAX; ORGANISM_TAXID: 3847	01-JUL-21	12-OCT-21	n/a	18346.8	0.731	5.57	0.056	1.13	0.0015	3.85	0.0049	27.9	0.44	55.7	17.98	10.26	2.99	83	0	87.36	1.44675
A0A0R0F8N1-F1	AF-A0A0R0F8N1-F1-model_v1	ALPHAFOLD V2.0 PREDICTION FOR UNCHARACTERIZED PROTEIN (A0A0R0F8N1)	MOL_ID: 1; ORGANISM_SCIENTIFIC: GLYCINE MAX; ORGANISM_TAXID: 3847	01-JUL-21	12-OCT-21	1-26	9572.5	0.752	8.47	0.086	0.83	0.0011	2.53	0.0034	16.3	0.26	36.6	13.25	2.67	2.23	78	0	73.41	1.44664
Q6PK57-F1	AF-Q6PK57-F1-model_v1	ALPHAFOLD V2.0 PREDICTION FOR PUTATIVE GED DOMAIN-CONTAINING PROTEIN DNM1P34 (Q6PK57)	MOL_ID: 1; ORGANISM_SCIENTIFIC: HOMO SAPIENS; ORGANISM_TAXID: 9606	01-JUL-21	12-OCT-21	n/a	11592.5	0.729	7.65	0.077	0.991	0.0013	2.8	0.0038	18.3	0.29	40.5	14.91	3.34	3.02	84.2	0	83.56	1.44643
P75801-F1	AF-P75801-F1-model_v1	ALPHAFOLD V2.0 PREDICTION FOR PROBABLE DIGUANYLATE CYCLASE DGCI (P75801)	MOL_ID: 1; ORGANISM_SCIENTIFIC: ESCHERICHIA COLI (STRAIN K12); ORGANISM_TAXID: 83333	01-JUL-21	12-OCT-21	1-23	47331.3	0.747	5.43	0.055	2.68	0.0034	3.95	0.005	11.3	0.18	57.1	17.13	5.43	4.64	47.9	17	87.36	1.44557
Q8IVY1-F1	AF-Q8IVY1-F1-model_v1	ALPHAFOLD V2.0 PREDICTION FOR TYPE III ENDOSOME MEMBRANE PROTEIN TEMP (Q8IVY1)	MOL_ID: 1; ORGANISM_SCIENTIFIC: HOMO SAPIENS; ORGANISM_TAXID: 9606	01-JUL-21	12-OCT-21	n/a	12023.1	0.73	6.32	0.064	0.846	0.0012	3.39	0.0047	32.7	0.53	49	18.98	6.12	3.79	33	0	65.09	1.44543
Q14802-F1	AF-Q14802-F1-model_v1	ALPHAFOLD V2.0 PREDICTION FOR FXYD DOMAIN-CONTAINING ION TRANSPORT REGULATOR 3 (Q14802)	MOL_ID: 1; ORGANISM_SCIENTIFIC: HOMO SAPIENS; ORGANISM_TAXID: 9606	01-JUL-21	12-OCT-21	1-20	7149.9	0.735	9.06	0.091	0.708	0.00098	2.36	0.0033	17.9	0.29	34.1	12.45	2.85	2.2	43.9	0	67.63	1.44492
P03928-F1	AF-P03928-F1-model_v1	ALPHAFOLD V2.0 PREDICTION FOR ATP SYNTHASE PROTEIN 8 (P03928)	MOL_ID: 1; ORGANISM_SCIENTIFIC: HOMO SAPIENS; ORGANISM_TAXID: 9606	01-JUL-21	12-OCT-21	n/a	7999.3	0.755	8.75	0.088	0.708	0.00094	2.45	0.0033	17.3	0.27	35.4	12.72	3.08	2.4	55.2	0	73.55	1.4449
A0A0R0JUP7-F1	AF-A0A0R0JUP7-F1-model_v1	ALPHAFOLD V2.0 PREDICTION FOR UNCHARACTERIZED PROTEIN (A0A0R0JUP7)	MOL_ID: 1; ORGANISM_SCIENTIFIC: GLYCINE MAX; ORGANISM_TAXID: 3847	01-JUL-21	12-OCT-21	n/a	10482.9	0.754	8	0.081	0.851	0.0012	2.68	0.0037	17.8	0.28	38.7	14.51	4.04	2.25	85.4	0	75.73	1.44403
Q4CY66-F1	AF-Q4CY66-F1-model_v1	ALPHAFOLD V2.0 PREDICTION FOR UNCHARACTERIZED PROTEIN (Q4CY66)	MOL_ID: 1; ORGANISM_SCIENTIFIC: TRYPANOSOMA CRUZI (STRAIN CL BRENER); ORGANISM_TAXID: 353153	01-JUL-21	12-OCT-21	n/a	83798.5	0.725	2.86	0.029	2.72	0.0038	7.48	0.01	47.3	0.76	108	39.57	8.76	8.41	68.7	0	69.36	1.44385
A0A0P0XWF4-F1	AF-A0A0P0XWF4-F1-model_v1	ALPHAFOLD V2.0 PREDICTION FOR OS10G0504600 PROTEIN (A0A0P0XWF4)	MOL_ID: 1; ORGANISM_SCIENTIFIC: ORYZA SATIVA SUBSP. JAPONICA; ORGANISM_TAXID: 39947	01-JUL-21	12-OCT-21	n/a	32581.2	0.727	4.49	0.045	1.65	0.0023	4.78	0.0066	32.6	0.52	69	26.69	7.5	4.38	80.8	0	85.43	1.44351
H2L278-F1	AF-H2L278-F1-model_v1	ALPHAFOLD V2.0 PREDICTION FOR UNCHARACTERIZED PROTEIN (H2L278)	MOL_ID: 1; ORGANISM_SCIENTIFIC: CAENORHABDITIS ELEGANS; ORGANISM_TAXID: 6239	01-JUL-21	12-OCT-21	n/a	7321.4	0.751	9.19	0.093	0.691	0.00095	2.33	0.0032	17	0.27	33.6	12.41	2.62	2.37	76.9	0	67.42	1.44206
Q9BUW7-F1	AF-Q9BUW7-F1-model_v1	ALPHAFOLD V2.0 PREDICTION FOR BUBLIN COILED-COIL PROTEIN (Q9BUW7)	MOL_ID: 1; ORGANISM_SCIENTIFIC: HOMO SAPIENS; ORGANISM_TAXID: 9606	01-JUL-21	12-OCT-21	n/a	9041.6	0.711	8.02	0.081	0.863	0.0012	2.67	0.0037	21.2	0.34	38.5	15.15	3.26	2.33	62.2	0	80.12	1.44195
A0A0R4IUZ0-F1	AF-A0A0R4IUZ0-F1-model_v1	ALPHAFOLD V2.0 PREDICTION FOR LEUCINE ZIPPER TRANSCRIPTION FACTOR-LIKE PROTEIN 1 (A0A0R4IUZ0)	MOL_ID: 1; ORGANISM_SCIENTIFIC: DANIO RERIO; ORGANISM_TAXID: 7955	01-JUL-21	12-OCT-21	n/a	34539.9	0.737	4.59	0.046	1.72	0.0022	4.67	0.0061	26.8	0.42	67.3	21.87	8.76	3.94	82.8	0	85.9	1.44111
Q8N7C7-F1	AF-Q8N7C7-F1-model_v1	ALPHAFOLD V2.0 PREDICTION FOR RING FINGER PROTEIN 148 (Q8N7C7)	MOL_ID: 1; ORGANISM_SCIENTIFIC: HOMO SAPIENS; ORGANISM_TAXID: 9606	01-JUL-21	12-OCT-21	1-34	30741.7	0.741	6.17	0.062	2.02	0.0025	3.47	0.0043	11.8	0.19	50	15.63	4.27	4.42	28.9	19.6	90.24	1.44092
A0A0P0XSN8-F1	AF-A0A0P0XSN8-F1-model_v1	ALPHAFOLD V2.0 PREDICTION FOR OS10G0142700 PROTEIN (A0A0P0XSN8)	MOL_ID: 1; ORGANISM_SCIENTIFIC: ORYZA SATIVA SUBSP. JAPONICA; ORGANISM_TAXID: 39947	01-JUL-21	12-OCT-21	n/a	7193.4	0.725	9.09	0.092	0.741	0.001	2.36	0.0033	17.9	0.28	34	12.78	2.4	1.91	72.9	0	77.23	1.44068
Q5XJ41-F1	AF-Q5XJ41-F1-model_v1	ALPHAFOLD V2.0 PREDICTION FOR PTTG1-INTERACTING PROTEIN B (Q5XJ41)	MOL_ID: 1; ORGANISM_SCIENTIFIC: DANIO RERIO; ORGANISM_TAXID: 7955	01-JUL-21	12-OCT-21	1-23	17170.1	0.731	7.09	0.071	1.35	0.0017	3.02	0.0038	14.2	0.22	43.5	13.95	4.38	3.25	52.7	5.4	81.17	1.4404
P31042-F1	AF-P31042-F1-model_v1	ALPHAFOLD V2.0 PREDICTION FOR T-CELL-SPECIFIC SURFACE GLYCOPROTEIN CD28 (P31042)	MOL_ID: 1; ORGANISM_SCIENTIFIC: RATTUS NORVEGICUS; ORGANISM_TAXID: 10116	01-JUL-21	12-OCT-21	1-19	22978.9	0.736	6.32	0.064	1.58	0.002	3.39	0.0043	15.7	0.25	48.8	16.43	4.7	4.14	19.7	26.8	84.02	1.43953
Q4CP14-F1	AF-Q4CP14-F1-model_v1	ALPHAFOLD V2.0 PREDICTION FOR UNCHARACTERIZED PROTEIN (Q4CP14)	MOL_ID: 1; ORGANISM_SCIENTIFIC: TRYPANOSOMA CRUZI (STRAIN CL BRENER); ORGANISM_TAXID: 353153	01-JUL-21	12-OCT-21	n/a	49631.5	0.728	3.68	0.037	2.05	0.0029	5.83	0.0082	38.8	0.62	83.9	31.95	10.02	6.58	89.9	0	82.3	1.43911
A0A1D6PZY5-F1	AF-A0A1D6PZY5-F1-model_v1	ALPHAFOLD V2.0 PREDICTION FOR UNCHARACTERIZED PROTEIN (A0A1D6PZY5)	MOL_ID: 1; ORGANISM_SCIENTIFIC: ZEA MAYS; ORGANISM_TAXID: 4577	01-JUL-21	12-OCT-21	n/a	20268	0.72	5.37	0.054	1.26	0.0017	3.99	0.0054	28.8	0.46	57.4	21.6	5.6	3.11	67.6	0	76.39	1.4386
Q9Y5E4-F1	AF-Q9Y5E4-F1-model_v1	ALPHAFOLD V2.0 PREDICTION FOR PROTOCADHERIN BETA-5 (Q9Y5E4)	MOL_ID: 1; ORGANISM_SCIENTIFIC: HOMO SAPIENS; ORGANISM_TAXID: 9606	01-JUL-21	12-OCT-21	1-30	83060.3	0.736	3.54	0.036	3.2	0.0042	6.05	0.008	23.6	0.37	87	29.9	11.65	8.08	5.9	30.4	82.65	1.43802
L0T2W6-F1	AF-L0T2W6-F1-model_v1	ALPHAFOLD V2.0 PREDICTION FOR MCE-FAMILY PROTEIN MCE1F (L0T2W6)	MOL_ID: 1; ORGANISM_SCIENTIFIC: MYCOBACTERIUM TUBERCULOSIS (STRAIN ATCC 25618 / H37RV); ORGANISM_TAXID: 83332	01-JUL-21	12-OCT-21	n/a	54034.8	0.737	3.91	0.039	2.29	0.0029	5.48	0.007	26.4	0.42	78.8	23.79	9.76	7.46	36.4	10.3	81.34	1.43796
Q194S6-F1	AF-Q194S6-F1-model_v1	ALPHAFOLD V2.0 PREDICTION FOR UNCHARACTERIZED PROTEIN (Q194S6)	MOL_ID: 1; ORGANISM_SCIENTIFIC: CAENORHABDITIS ELEGANS; ORGANISM_TAXID: 6239	01-JUL-21	12-OCT-21	n/a	15917.7	0.738	6.59	0.067	1.13	0.0016	3.25	0.0045	21.1	0.34	46.7	18	3.88	4.05	31.9	22.7	68.28	1.43692
I1JUQ4-F1	AF-I1JUQ4-F1-model_v1	ALPHAFOLD V2.0 PREDICTION FOR UNCHARACTERIZED PROTEIN (I1JUQ4)	MOL_ID: 1; ORGANISM_SCIENTIFIC: GLYCINE MAX; ORGANISM_TAXID: 3847	01-JUL-21	12-OCT-21	1-24	47029.5	0.744	3.88	0.039	1.93	0.0027	5.52	0.0077	36.9	0.59	79.3	31.2	7.7	6.98	83.5	0	77.47	1.43659
A0A0R0JUH2-F1	AF-A0A0R0JUH2-F1-model_v1	ALPHAFOLD V2.0 PREDICTION FOR UNCHARACTERIZED PROTEIN (A0A0R0JUH2)	MOL_ID: 1; ORGANISM_SCIENTIFIC: GLYCINE MAX; ORGANISM_TAXID: 3847	01-JUL-21	12-OCT-21	n/a	6711.4	0.75	8.82	0.089	0.61	0.00083	2.43	0.0033	20.4	0.32	34.9	12.92	3.96	2.52	25.4	0	64.55	1.43621
Q4CLG8-F1	AF-Q4CLG8-F1-model_v1	ALPHAFOLD V2.0 PREDICTION FOR MUCIN-ASSOCIATED SURFACE PROTEIN (MASP), PUTATIVE (Q4CLG8)	MOL_ID: 1; ORGANISM_SCIENTIFIC: TRYPANOSOMA CRUZI (STRAIN CL BRENER); ORGANISM_TAXID: 353153	01-JUL-21	12-OCT-21	n/a	4544.9	0.731	11.4	0.12	0.576	0.00077	1.88	0.0025	13.7	0.22	27	9.78	2.44	1.7	42.5	0	69.64	1.43617
Q19528-F1	AF-Q19528-F1-model_v1	ALPHAFOLD V2.0 PREDICTION FOR COL_CUTICLE_N DOMAIN-CONTAINING PROTEIN (Q19528)	MOL_ID: 1; ORGANISM_SCIENTIFIC: CAENORHABDITIS ELEGANS; ORGANISM_TAXID: 6239	01-JUL-21	12-OCT-21	n/a	28843.1	0.719	4.49	0.045	1.5	0.0022	4.77	0.007	39.5	0.64	68.5	28.24	7.2	4.27	25.4	0	64.16	1.43606
A0A1D6GT30-F1	AF-A0A1D6GT30-F1-model_v1	ALPHAFOLD V2.0 PREDICTION FOR PUTATIVE WEB FAMILY PROTEIN CHLOROPLASTIC (A0A1D6GT30)	MOL_ID: 1; ORGANISM_SCIENTIFIC: ZEA MAYS; ORGANISM_TAXID: 4577	01-JUL-21	12-OCT-21	n/a	103874	0.729	2.11	0.021	2.45	0.0033	10.1	0.014	91.5	1.45	145	53.55	19.87	12.21	62.1	0	69.75	1.43564
Q84ZT3-F1	AF-Q84ZT3-F1-model_v1	ALPHAFOLD V2.0 PREDICTION FOR OS07G0583000 PROTEIN (Q84ZT3)	MOL_ID: 1; ORGANISM_SCIENTIFIC: ORYZA SATIVA SUBSP. JAPONICA; ORGANISM_TAXID: 39947	01-JUL-21	12-OCT-21	n/a	7489.8	0.744	9.23	0.093	0.73	0.00095	2.32	0.003	15.2	0.24	33.3	11.31	2.97	2.91	62.1	0	77.05	1.43534
Q4D9L2-F1	AF-Q4D9L2-F1-model_v1	ALPHAFOLD V2.0 PREDICTION FOR UNCHARACTERIZED PROTEIN (Q4D9L2)	MOL_ID: 1; ORGANISM_SCIENTIFIC: TRYPANOSOMA CRUZI (STRAIN CL BRENER); ORGANISM_TAXID: 353153	01-JUL-21	12-OCT-21	n/a	56094.7	0.727	3.6	0.036	2.27	0.003	5.95	0.0078	32.1	0.51	85.4	29.87	8.92	8.58	53	4.3	70.8	1.43529
Q9UN66-F1	AF-Q9UN66-F1-model_v1	ALPHAFOLD V2.0 PREDICTION FOR PROTOCADHERIN BETA-8 (Q9UN66)	MOL_ID: 1; ORGANISM_SCIENTIFIC: HOMO SAPIENS; ORGANISM_TAXID: 9606	01-JUL-21	12-OCT-21	1-29	84488.9	0.735	3.6	0.036	3.32	0.0044	5.95	0.0078	22.3	0.35	85.4	29.61	8.46	7.42	7.1	30.1	82.99	1.43529
G3V9R7-F1	AF-G3V9R7-F1-model_v1	ALPHAFOLD V2.0 PREDICTION FOR PROTOCADHERIN BETA 19 (G3V9R7)	MOL_ID: 1; ORGANISM_SCIENTIFIC: RATTUS NORVEGICUS; ORGANISM_TAXID: 10116	01-JUL-21	12-OCT-21	1-26	84988.6	0.736	3.62	0.037	3.35	0.0043	5.91	0.0076	21.4	0.34	84.8	29.05	7.93	9.07	8.4	29.7	82.79	1.43486
Q86JG2-F1	AF-Q86JG2-F1-model_v1	ALPHAFOLD V2.0 PREDICTION FOR PUTATIVE UNCHARACTERIZED PROTEIN DDB_G0271554 (Q86JG2)	MOL_ID: 1; ORGANISM_SCIENTIFIC: DICTYOSTELIUM DISCOIDEUM; ORGANISM_TAXID: 44689	01-JUL-21	12-OCT-21	n/a	6832.1	0.725	9.3	0.094	0.72	0.00099	2.3	0.0032	17.1	0.27	33	12.06	2.66	2.05	55.9	0	64.33	1.43478
F1QAQ9-F1	AF-F1QAQ9-F1-model_v1	ALPHAFOLD V2.0 PREDICTION FOR COILED-COIL DOMAIN-CONTAINING 83 (F1QAQ9)	MOL_ID: 1; ORGANISM_SCIENTIFIC: DANIO RERIO; ORGANISM_TAXID: 7955	01-JUL-21	12-OCT-21	n/a	45463.3	0.731	3.64	0.037	1.83	0.0026	5.89	0.0083	42.5	0.68	84.5	30.28	11.87	8.49	63.6	0	76.94	1.43463
P53801-F1	AF-P53801-F1-model_v1	ALPHAFOLD V2.0 PREDICTION FOR PITUITARY TUMOR-TRANSFORMING GENE 1 PROTEIN-INTERACTING PROTEIN (P53801)	MOL_ID: 1; ORGANISM_SCIENTIFIC: HOMO SAPIENS; ORGANISM_TAXID: 9606	01-JUL-21	12-OCT-21	1-32	17058.3	0.724	6.9	0.069	1.34	0.0017	3.11	0.0039	15.5	0.24	44.6	13.98	4.89	3.91	51	5.4	81.91	1.43408
A0A0N7KTG0-F1	AF-A0A0N7KTG0-F1-model_v1	ALPHAFOLD V2.0 PREDICTION FOR OS12G0107300 PROTEIN (A0A0N7KTG0)	MOL_ID: 1; ORGANISM_SCIENTIFIC: ORYZA SATIVA SUBSP. JAPONICA; ORGANISM_TAXID: 39947	01-JUL-21	12-OCT-21	n/a	6472.1	0.725	8.08	0.082	0.593	0.00081	2.65	0.0036	26.9	0.43	38	13.27	5.58	3.18	0	0	67.56	1.43396
Q4DNZ6-F1	AF-Q4DNZ6-F1-model_v1	ALPHAFOLD V2.0 PREDICTION FOR UNCHARACTERIZED PROTEIN (Q4DNZ6)	MOL_ID: 1; ORGANISM_SCIENTIFIC: TRYPANOSOMA CRUZI (STRAIN CL BRENER); ORGANISM_TAXID: 353153	01-JUL-21	12-OCT-21	n/a	54808.1	0.733	3.78	0.038	2.28	0.0031	5.67	0.0078	31.2	0.5	81.3	31.08	6.82	6.79	78.2	0	75.25	1.43386
Q9XVY8-F1	AF-Q9XVY8-F1-model_v1	ALPHAFOLD V2.0 PREDICTION FOR UNCHARACTERIZED PROTEIN (Q9XVY8)	MOL_ID: 1; ORGANISM_SCIENTIFIC: CAENORHABDITIS ELEGANS; ORGANISM_TAXID: 6239	01-JUL-21	12-OCT-21	n/a	9979.8	0.722	7.87	0.079	0.9	0.0013	2.72	0.0038	20.2	0.32	39	15.02	2.88	2.47	84.9	0	81.87	1.43382
P0C5K6-F1	AF-P0C5K6-F1-model_v1	ALPHAFOLD V2.0 PREDICTION FOR PUTATIVE TUMOR ANTIGEN NA88-A (P0C5K6)	MOL_ID: 1; ORGANISM_SCIENTIFIC: HOMO SAPIENS; ORGANISM_TAXID: 9606	01-JUL-21	12-OCT-21	n/a	3502.8	0.727	12.4	0.12	0.488	0.00064	1.73	0.0023	13.6	0.21	24.8	8.22	2.62	1.93	15.6	0	68.61	1.43353
Q4E2Z4-F1	AF-Q4E2Z4-F1-model_v1	ALPHAFOLD V2.0 PREDICTION FOR UNCHARACTERIZED PROTEIN (Q4E2Z4)	MOL_ID: 1; ORGANISM_SCIENTIFIC: TRYPANOSOMA CRUZI (STRAIN CL BRENER); ORGANISM_TAXID: 353153	01-JUL-21	12-OCT-21	n/a	20889.6	0.731	5.98	0.06	1.39	0.0018	3.58	0.0047	20.2	0.32	51.3	17.77	6.54	3.56	58.3	10.6	89.68	1.43296
P08124-F1	AF-P08124-F1-model_v1	ALPHAFOLD V2.0 PREDICTION FOR CUTICLE COLLAGEN 1 (P08124)	MOL_ID: 1; ORGANISM_SCIENTIFIC: CAENORHABDITIS ELEGANS; ORGANISM_TAXID: 6239	01-JUL-21	12-OCT-21	1-37	25238.2	0.717	5.04	0.051	1.48	0.0021	4.25	0.0059	29.9	0.48	60.9	22.16	6.75	4.59	11.8	0	59.3	1.43294
D4ACT6-F1	AF-D4ACT6-F1-model_v1	ALPHAFOLD V2.0 PREDICTION FOR PROTOCADHERIN GAMMA SUBFAMILY A, 1 (D4ACT6)	MOL_ID: 1; ORGANISM_SCIENTIFIC: RATTUS NORVEGICUS; ORGANISM_TAXID: 10116	01-JUL-21	12-OCT-21	1-28	85575.1	0.735	3.56	0.036	3.32	0.0044	6.03	0.008	23	0.36	86.4	29.58	10	7.05	8.6	29.2	82.94	1.43284
A0A0R0ENQ2-F1	AF-A0A0R0ENQ2-F1-model_v1	ALPHAFOLD V2.0 PREDICTION FOR UNCHARACTERIZED PROTEIN (A0A0R0ENQ2)	MOL_ID: 1; ORGANISM_SCIENTIFIC: GLYCINE MAX; ORGANISM_TAXID: 3847	01-JUL-21	12-OCT-21	n/a	30652.2	0.743	5.03	0.051	1.64	0.0022	4.26	0.0056	22.6	0.36	61	21.36	7.03	4.43	82.9	0	77.6	1.43192
Q18689-F1	AF-Q18689-F1-model_v1	ALPHAFOLD V2.0 PREDICTION FOR GAS (HUMAN GROWTH ARREST-SPECIFIC) RELATED (Q18689)	MOL_ID: 1; ORGANISM_SCIENTIFIC: CAENORHABDITIS ELEGANS; ORGANISM_TAXID: 6239	01-JUL-21	12-OCT-21	n/a	47564	0.731	3.84	0.039	2.02	0.0028	5.59	0.0079	34.8	0.56	80	31.3	6.61	4.11	78	0	79.94	1.43113
Q9Y5E2-F1	AF-Q9Y5E2-F1-model_v1	ALPHAFOLD V2.0 PREDICTION FOR PROTOCADHERIN BETA-7 (Q9Y5E2)	MOL_ID: 1; ORGANISM_SCIENTIFIC: HOMO SAPIENS; ORGANISM_TAXID: 9606	01-JUL-21	12-OCT-21	1-26	83639	0.738	3.56	0.036	3.22	0.0042	6.01	0.0078	23.2	0.37	86	29.44	10.39	6.71	6.5	30.3	83.22	1.43095
A0A0N7KE08-F1	AF-A0A0N7KE08-F1-model_v1	ALPHAFOLD V2.0 PREDICTION FOR OS01G0834900 PROTEIN (A0A0N7KE08)	MOL_ID: 1; ORGANISM_SCIENTIFIC: ORYZA SATIVA SUBSP. JAPONICA; ORGANISM_TAXID: 39947	01-JUL-21	12-OCT-21	n/a	6970.3	0.717	8.7	0.088	0.708	0.00094	2.46	0.0033	19.7	0.31	35.2	11.97	3.34	3.06	39.1	0	70.5	1.43089
Q58EG2-F1	AF-Q58EG2-F1-model_v1	ALPHAFOLD V2.0 PREDICTION FOR ERLIN-1 (Q58EG2)	MOL_ID: 1; ORGANISM_SCIENTIFIC: DANIO RERIO; ORGANISM_TAXID: 7955	01-JUL-21	12-OCT-21	n/a	38321.1	0.743	4.64	0.047	1.88	0.0025	4.62	0.0061	23.1	0.37	66.1	22.66	7.13	5.7	54.5	12.6	85.52	1.43074
A0A0P0XRR9-F1	AF-A0A0P0XRR9-F1-model_v1	ALPHAFOLD V2.0 PREDICTION FOR OS10G0156300 PROTEIN (A0A0P0XRR9)	MOL_ID: 1; ORGANISM_SCIENTIFIC: ORYZA SATIVA SUBSP. JAPONICA; ORGANISM_TAXID: 39947	01-JUL-21	12-OCT-21	n/a	5302.5	0.722	9.61	0.097	0.584	0.00078	2.23	0.003	19.6	0.31	31.9	11.42	3.04	2.36	11.8	0	62.33	1.43049
F1QK04-F1	AF-F1QK04-F1-model_v1	ALPHAFOLD V2.0 PREDICTION FOR FXYD DOMAIN-CONTAINING ION TRANSPORT REGULATOR (F1QK04)	MOL_ID: 1; ORGANISM_SCIENTIFIC: DANIO RERIO; ORGANISM_TAXID: 7955	01-JUL-21	12-OCT-21	1-17	8953.5	0.737	7.88	0.08	0.765	0.001	2.72	0.0037	21.4	0.34	38.9	14.29	3.72	2.43	35.8	0	65.71	1.43015
P91285-F1	AF-P91285-F1-model_v1	ALPHAFOLD V2.0 PREDICTION FOR CUTICLE COLLAGEN DPY-5 (P91285)	MOL_ID: 1; ORGANISM_SCIENTIFIC: CAENORHABDITIS ELEGANS; ORGANISM_TAXID: 6239	01-JUL-21	12-OCT-21	n/a	28212.3	0.714	4.61	0.047	1.53	0.0022	4.65	0.0067	35.2	0.57	66.5	25.25	8.68	6.01	22.6	0	61.06	1.43011
A0A1D6EGC5-F1	AF-A0A1D6EGC5-F1-model_v1	ALPHAFOLD V2.0 PREDICTION FOR UNCHARACTERIZED PROTEIN (A0A1D6EGC5)	MOL_ID: 1; ORGANISM_SCIENTIFIC: ZEA MAYS; ORGANISM_TAXID: 4577	01-JUL-21	12-OCT-21	n/a	12884.6	0.737	6.69	0.067	0.934	0.0013	3.21	0.0043	24.3	0.39	45.9	15.5	7.2	2.99	67.2	0	82.71	1.42991
I1LPC8-F1	AF-I1LPC8-F1-model_v1	ALPHAFOLD V2.0 PREDICTION FOR UNCHARACTERIZED PROTEIN (I1LPC8)	MOL_ID: 1; ORGANISM_SCIENTIFIC: GLYCINE MAX; ORGANISM_TAXID: 3847	01-JUL-21	12-OCT-21	n/a	10420.5	0.728	7.79	0.079	0.91	0.0013	2.75	0.0039	19.8	0.32	39.3	15.35	2.88	2.11	86.5	0	87.42	1.42909
Q6ZUS5-F1	AF-Q6ZUS5-F1-model_v1	ALPHAFOLD V2.0 PREDICTION FOR COILED-COIL DOMAIN-CONTAINING PROTEIN 121 (Q6ZUS5)	MOL_ID: 1; ORGANISM_SCIENTIFIC: HOMO SAPIENS; ORGANISM_TAXID: 9606	01-JUL-21	12-OCT-21	n/a	33085.1	0.736	4.5	0.045	1.62	0.0022	4.76	0.0066	30.9	0.49	68	26.12	7.12	4.41	88.8	0	87.74	1.42857
Q8TAB7-F1	AF-Q8TAB7-F1-model_v1	ALPHAFOLD V2.0 PREDICTION FOR PUTATIVE COILED-COIL DOMAIN-CONTAINING PROTEIN 26 (Q8TAB7)	MOL_ID: 1; ORGANISM_SCIENTIFIC: HOMO SAPIENS; ORGANISM_TAXID: 9606	01-JUL-21	12-OCT-21	n/a	13200.1	0.734	6.66	0.067	0.964	0.0013	3.22	0.0043	23.5	0.37	46	16.65	5.17	2.73	73.2	0	71.72	1.42857
P27469-F1	AF-P27469-F1-model_v1	ALPHAFOLD V2.0 PREDICTION FOR G0/G1 SWITCH PROTEIN 2 (P27469)	MOL_ID: 1; ORGANISM_SCIENTIFIC: HOMO SAPIENS; ORGANISM_TAXID: 9606	01-JUL-21	12-OCT-21	n/a	11328.3	0.748	7.51	0.076	0.885	0.0012	2.85	0.0038	18.8	0.3	40.7	14	4.51	2.74	92.2	0	77.66	1.42807
Q4D208-F1	AF-Q4D208-F1-model_v1	ALPHAFOLD V2.0 PREDICTION FOR UNCHARACTERIZED PROTEIN (Q4D208)	MOL_ID: 1; ORGANISM_SCIENTIFIC: TRYPANOSOMA CRUZI (STRAIN CL BRENER); ORGANISM_TAXID: 353153	01-JUL-21	12-OCT-21	n/a	42418.6	0.726	4.12	0.041	1.97	0.0025	5.21	0.0065	27.9	0.44	74.4	24.22	8.24	8.32	57.5	1.6	76.73	1.42802
Q9VVN2-F1	AF-Q9VVN2-F1-model_v1	ALPHAFOLD V2.0 PREDICTION FOR PROBABLE 28S RIBOSOMAL PROTEIN S26, MITOCHONDRIAL (Q9VVN2)	MOL_ID: 1; ORGANISM_SCIENTIFIC: DROSOPHILA MELANOGASTER; ORGANISM_TAXID: 7227	01-JUL-21	12-OCT-21	n/a	26270.9	0.729	5.07	0.051	1.49	0.0018	4.23	0.0051	24.5	0.38	60.4	18.38	7.84	6.24	53.1	1.8	81.8	1.4279
P59074-F1	AF-P59074-F1-model_v1	ALPHAFOLD V2.0 PREDICTION FOR PUTATIVE CHARGED MULTIVESICULAR BODY PROTEIN 4B-LIKE PROTEIN CHMP4BP1 (P59074)	MOL_ID: 1; ORGANISM_SCIENTIFIC: HOMO SAPIENS; ORGANISM_TAXID: 9606	01-JUL-21	12-OCT-21	n/a	19065.9	0.737	5.83	0.059	1.21	0.0015	3.68	0.0046	21.9	0.34	52.5	16.75	6.78	3.35	68.2	0	76.14	1.42663
Q4DFS0-F1	AF-Q4DFS0-F1-model_v1	ALPHAFOLD V2.0 PREDICTION FOR ATPASE SUBUNIT 9, PUTATIVE (Q4DFS0)	MOL_ID: 1; ORGANISM_SCIENTIFIC: TRYPANOSOMA CRUZI (STRAIN CL BRENER); ORGANISM_TAXID: 353153	01-JUL-21	12-OCT-21	n/a	11317.7	0.766	7.55	0.076	0.825	0.0011	2.84	0.0039	19.9	0.32	40.5	15.25	4.41	2.38	68.2	0	83.1	1.42606
Q54QH4-F1	AF-Q54QH4-F1-model_v1	ALPHAFOLD V2.0 PREDICTION FOR UNCHARACTERIZED PROTEIN (Q54QH4)	MOL_ID: 1; ORGANISM_SCIENTIFIC: DICTYOSTELIUM DISCOIDEUM; ORGANISM_TAXID: 44689	01-JUL-21	12-OCT-21	n/a	99524.4	0.718	2.35	0.024	2.72	0.0039	9.12	0.013	75.8	1.22	130	53.64	13.39	11.61	47.8	0.7	65.87	1.42544
Q3TMW1-F1	AF-Q3TMW1-F1-model_v1	ALPHAFOLD V2.0 PREDICTION FOR COILED-COIL DOMAIN-CONTAINING PROTEIN 102A (Q3TMW1)	MOL_ID: 1; ORGANISM_SCIENTIFIC: MUS MUSCULUS; ORGANISM_TAXID: 10090	01-JUL-21	12-OCT-21	n/a	62622	0.725	3.08	0.031	2.19	0.0031	6.96	0.0097	51.6	0.83	99.2	40.02	11.53	7.46	68.4	0	76.35	1.42529
Q91Y03-F1	AF-Q91Y03-F1-model_v1	ALPHAFOLD V2.0 PREDICTION FOR PROTOCADHERIN BETA 16 (Q91Y03)	MOL_ID: 1; ORGANISM_SCIENTIFIC: MUS MUSCULUS; ORGANISM_TAXID: 10090	01-JUL-21	12-OCT-21	1-28	85425.6	0.736	3.57	0.036	3.32	0.0044	6	0.0079	22.4	0.35	85.5	29.54	10.17	5.92	7.4	30.5	82.03	1.425
O95995-F1	AF-O95995-F1-model_v1	ALPHAFOLD V2.0 PREDICTION FOR DYNEIN REGULATORY COMPLEX SUBUNIT 4 (O95995)	MOL_ID: 1; ORGANISM_SCIENTIFIC: HOMO SAPIENS; ORGANISM_TAXID: 9606	01-JUL-21	12-OCT-21	n/a	56368.6	0.739	3.42	0.035	2.08	0.0029	6.26	0.0086	41.2	0.66	89.2	34.05	8.6	7.09	82.6	0	84.31	1.42492
Q9Y6X1-F1	AF-Q9Y6X1-F1-model_v1	ALPHAFOLD V2.0 PREDICTION FOR STRESS-ASSOCIATED ENDOPLASMIC RETICULUM PROTEIN 1 (Q9Y6X1)	MOL_ID: 1; ORGANISM_SCIENTIFIC: HOMO SAPIENS; ORGANISM_TAXID: 9606	01-JUL-21	12-OCT-21	n/a	7382.1	0.746	9.5	0.096	0.735	0.00095	2.26	0.0029	13.7	0.22	32.2	10.75	3.21	2.42	58.5	0	79.18	1.42478
A0A0R0JI57-F1	AF-A0A0R0JI57-F1-model_v1	ALPHAFOLD V2.0 PREDICTION FOR UNCHARACTERIZED PROTEIN (A0A0R0JI57)	MOL_ID: 1; ORGANISM_SCIENTIFIC: GLYCINE MAX; ORGANISM_TAXID: 3847	01-JUL-21	12-OCT-21	n/a	10362.1	0.777	8.34	0.084	0.795	0.0011	2.57	0.0035	15.8	0.25	36.6	14.07	3.37	2.32	89.9	0	77.37	1.42412
K7MAR6-F1	AF-K7MAR6-F1-model_v1	ALPHAFOLD V2.0 PREDICTION FOR UNCHARACTERIZED PROTEIN (K7MAR6)	MOL_ID: 1; ORGANISM_SCIENTIFIC: GLYCINE MAX; ORGANISM_TAXID: 3847	01-JUL-21	12-OCT-21	n/a	44613.6	0.734	3.84	0.039	1.88	0.0025	5.59	0.0076	35	0.56	79.6	30.14	6.95	6.58	60.7	0	72.06	1.42397
A4I0S3-F1	AF-A4I0S3-F1-model_v1	ALPHAFOLD V2.0 PREDICTION FOR HYPOTHETICAL_PROTEIN (A4I0S3)	MOL_ID: 1; ORGANISM_SCIENTIFIC: LEISHMANIA INFANTUM; ORGANISM_TAXID: 5671	01-JUL-21	12-OCT-21	n/a	27270.2	0.733	5.64	0.057	1.69	0.0023	3.8	0.0051	18.8	0.3	54.1	18.33	6.21	4.68	69.9	3.4	88.77	1.42368
A0A0R0JMR6-F1	AF-A0A0R0JMR6-F1-model_v1	ALPHAFOLD V2.0 PREDICTION FOR PROTEIN KINASE DOMAIN-CONTAINING PROTEIN (A0A0R0JMR6)	MOL_ID: 1; ORGANISM_SCIENTIFIC: GLYCINE MAX; ORGANISM_TAXID: 3847	01-JUL-21	12-OCT-21	1-28	66711.8	0.736	4.98	0.05	3.62	0.0044	4.3	0.0052	9.82	0.15	61.2	18.65	6.09	5.4	26.2	20.4	87.02	1.42326
Q2FUR4-F1	AF-Q2FUR4-F1-model_v1	ALPHAFOLD V2.0 PREDICTION FOR UNCHARACTERIZED PROTEIN (Q2FUR4)	MOL_ID: 1; ORGANISM_SCIENTIFIC: STAPHYLOCOCCUS AUREUS (STRAIN NCTC 8325 / PS 47); ORGANISM_TAXID: 93061	01-JUL-21	12-OCT-21	n/a	9168.9	0.769	8.91	0.09	0.779	0.001	2.41	0.0032	14.4	0.23	34.3	12.6	2.18	1.89	96.2	0	85.46	1.42324
A0A0P0WMJ8-F1	AF-A0A0P0WMJ8-F1-model_v1	ALPHAFOLD V2.0 PREDICTION FOR OS05G0419050 PROTEIN (A0A0P0WMJ8)	MOL_ID: 1; ORGANISM_SCIENTIFIC: ORYZA SATIVA SUBSP. JAPONICA; ORGANISM_TAXID: 39947	01-JUL-21	12-OCT-21	n/a	9975.6	0.716	6.87	0.069	0.803	0.0011	3.12	0.0041	28	0.44	44.4	15.01	5.75	4.81	12.4	0	69.79	1.42308
A0A0R0K7A9-F1	AF-A0A0R0K7A9-F1-model_v1	ALPHAFOLD V2.0 PREDICTION FOR UNCHARACTERIZED PROTEIN (A0A0R0K7A9)	MOL_ID: 1; ORGANISM_SCIENTIFIC: GLYCINE MAX; ORGANISM_TAXID: 3847	01-JUL-21	12-OCT-21	n/a	9425.9	0.744	8.47	0.085	0.843	0.0011	2.53	0.0033	15.5	0.25	36	12.88	4.04	2.28	92.9	0	80.25	1.42292
Q8GY72-F1	AF-Q8GY72-F1-model_v1	ALPHAFOLD V2.0 PREDICTION FOR AT5G03050 (Q8GY72)	MOL_ID: 1; ORGANISM_SCIENTIFIC: ARABIDOPSIS THALIANA; ORGANISM_TAXID: 3702	01-JUL-21	12-OCT-21	n/a	16054	0.726	6.16	0.062	1.12	0.0015	3.48	0.0046	23.8	0.38	49.5	17.99	5.12	2.8	71.9	0	80.05	1.42241
D3Z8Y3-F1	AF-D3Z8Y3-F1-model_v1	ALPHAFOLD V2.0 PREDICTION FOR PROTOCADHERIN GAMMA SUBFAMILY A, 2 (D3Z8Y3)	MOL_ID: 1; ORGANISM_SCIENTIFIC: RATTUS NORVEGICUS; ORGANISM_TAXID: 10116	01-JUL-21	12-OCT-21	1-28	85640.9	0.734	3.55	0.036	3.33	0.0043	6.04	0.0078	22.4	0.36	85.9	29.38	11.51	5.43	8.3	28.7	82.04	1.42219
A0A0R0EX26-F1	AF-A0A0R0EX26-F1-model_v1	ALPHAFOLD V2.0 PREDICTION FOR UNCHARACTERIZED PROTEIN (A0A0R0EX26)	MOL_ID: 1; ORGANISM_SCIENTIFIC: GLYCINE MAX; ORGANISM_TAXID: 3847	01-JUL-21	12-OCT-21	n/a	10447.4	0.76	7.78	0.079	0.805	0.0011	2.75	0.0038	19.6	0.31	39.1	14.95	3.81	2.56	78.4	0	82.53	1.42182
D3ZQX9-F1	AF-D3ZQX9-F1-model_v1	ALPHAFOLD V2.0 PREDICTION FOR PROTOCADHERIN GAMMA SUBFAMILY A, 6 (D3ZQX9)	MOL_ID: 1; ORGANISM_SCIENTIFIC: RATTUS NORVEGICUS; ORGANISM_TAXID: 10116	01-JUL-21	12-OCT-21	1-25	85791.6	0.736	3.53	0.036	3.3	0.0043	6.07	0.0079	23.1	0.37	86.3	29.74	10.45	7.77	9.2	28.9	82.19	1.42175
A8WH76-F1	AF-A8WH76-F1-model_v1	ALPHAFOLD V2.0 PREDICTION FOR GEO10024P1 (A8WH76)	MOL_ID: 1; ORGANISM_SCIENTIFIC: DROSOPHILA MELANOGASTER; ORGANISM_TAXID: 7227	01-JUL-21	12-OCT-21	n/a	9034.4	0.751	8.13	0.082	0.754	0.0011	2.64	0.0037	19.6	0.31	37.5	14.99	3.71	2.13	56.2	0	70.53	1.42045
Q96PP8-F1	AF-Q96PP8-F1-model_v1	ALPHAFOLD V2.0 PREDICTION FOR GUANYLATE-BINDING PROTEIN 5 (Q96PP8)	MOL_ID: 1; ORGANISM_SCIENTIFIC: HOMO SAPIENS; ORGANISM_TAXID: 9606	01-JUL-21	12-OCT-21	n/a	66612.8	0.738	4.03	0.041	2.9	0.0041	5.32	0.0076	24.5	0.39	75.5	30.14	6.36	5.32	60	7.5	86.47	1.41917
I1J6M0-F1	AF-I1J6M0-F1-model_v1	ALPHAFOLD V2.0 PREDICTION FOR HOMOLOGOUS-PAIRING PROTEIN 2 HOMOLOG (I1J6M0)	MOL_ID: 1; ORGANISM_SCIENTIFIC: GLYCINE MAX; ORGANISM_TAXID: 3847	01-JUL-21	12-OCT-21	n/a	26321	0.736	5.61	0.056	1.61	0.0019	3.82	0.0046	17.6	0.27	54.2	15.42	7.13	4.88	63.3	4.4	88.8	1.41885
Q54BY9-F1	AF-Q54BY9-F1-model_v1	ALPHAFOLD V2.0 PREDICTION FOR UNCHARACTERIZED PROTEIN (Q54BY9)	MOL_ID: 1; ORGANISM_SCIENTIFIC: DICTYOSTELIUM DISCOIDEUM; ORGANISM_TAXID: 44689	01-JUL-21	12-OCT-21	n/a	78483.7	0.745	3.78	0.038	3.12	0.004	5.66	0.0072	19.1	0.3	80.3	24.16	10.66	7.92	55.4	12.6	77.35	1.41873
Q96TA0-F1	AF-Q96TA0-F1-model_v1	ALPHAFOLD V2.0 PREDICTION FOR PUTATIVE PROTOCADHERIN BETA-18 (Q96TA0)	MOL_ID: 1; ORGANISM_SCIENTIFIC: HOMO SAPIENS; ORGANISM_TAXID: 9606	01-JUL-21	12-OCT-21	n/a	80427.7	0.738	3.62	0.036	3.14	0.0041	5.93	0.0077	23.1	0.36	84.1	29.19	11.79	6.63	7	30.8	83.58	1.41821
H3BR10-F1	AF-H3BR10-F1-model_v1	ALPHAFOLD V2.0 PREDICTION FOR SMALL LEUCINE-RICH PROTEIN 1 (H3BR10)	MOL_ID: 1; ORGANISM_SCIENTIFIC: HOMO SAPIENS; ORGANISM_TAXID: 9606	01-JUL-21	12-OCT-21	n/a	12321.8	0.754	6.53	0.066	0.816	0.0011	3.28	0.0044	28	0.45	46.5	16.97	4.79	4.31	52.8	0	65.69	1.41768
Q9P1D8-F1	AF-Q9P1D8-F1-model_v1	ALPHAFOLD V2.0 PREDICTION FOR PUTATIVE UNCHARACTERIZED PROTEIN PRO2289 (Q9P1D8)	MOL_ID: 1; ORGANISM_SCIENTIFIC: HOMO SAPIENS; ORGANISM_TAXID: 9606	01-JUL-21	12-OCT-21	n/a	6610.3	0.72	8.22	0.083	0.627	0.00083	2.61	0.0034	24	0.38	37	11.88	5.82	3.21	0	0	64.99	1.41762
Q96FH0-F1	AF-Q96FH0-F1-model_v1	ALPHAFOLD V2.0 PREDICTION FOR BLOC-1-RELATED COMPLEX SUBUNIT 8 (Q96FH0)	MOL_ID: 1; ORGANISM_SCIENTIFIC: HOMO SAPIENS; ORGANISM_TAXID: 9606	01-JUL-21	12-OCT-21	n/a	13401.9	0.728	7.1	0.072	1.07	0.0014	3.02	0.0041	19.2	0.31	42.8	15.52	4.56	3.66	88.1	0	91.87	1.41722
P0DP72-F1	AF-P0DP72-F1-model_v1	ALPHAFOLD V2.0 PREDICTION FOR V-SET AND IMMUNOGLOBULIN DOMAIN-CONTAINING PROTEIN 10-LIKE 2 (P0DP72)	MOL_ID: 1; ORGANISM_SCIENTIFIC: HOMO SAPIENS; ORGANISM_TAXID: 9606	01-JUL-21	12-OCT-21	1-28	78566.4	0.734	3.6	0.036	3.1	0.0042	5.95	0.008	25.3	0.4	84.3	30.84	7.7	6.9	4.3	37.7	83.5	1.41681
Q54P53-F1	AF-Q54P53-F1-model_v1	ALPHAFOLD V2.0 PREDICTION FOR UNCHARACTERIZED PROTEIN (Q54P53)	MOL_ID: 1; ORGANISM_SCIENTIFIC: DICTYOSTELIUM DISCOIDEUM; ORGANISM_TAXID: 44689	01-JUL-21	12-OCT-21	n/a	10986.8	0.749	8.13	0.082	0.924	0.0012	2.64	0.0035	15.5	0.25	37.4	13.55	2.52	2.2	97.7	0	97.35	1.41667
Q64159-F1	AF-Q64159-F1-model_v1	ALPHAFOLD V2.0 PREDICTION FOR T-CELL SURFACE GLYCOPROTEIN CD3 GAMMA CHAIN (Q64159)	MOL_ID: 1; ORGANISM_SCIENTIFIC: RATTUS NORVEGICUS; ORGANISM_TAXID: 10116	01-JUL-21	12-OCT-21	1-22	18288.9	0.731	6.08	0.061	1.23	0.0016	3.53	0.0047	22.2	0.35	50	17.15	5.72	4.38	20.1	12.6	78.28	1.41643
Q57796-F1	AF-Q57796-F1-model_v1	ALPHAFOLD V2.0 PREDICTION FOR UNCHARACTERIZED PROTEIN MJ0350 (Q57796)	MOL_ID: 1; ORGANISM_SCIENTIFIC: METHANOCALDOCOCCUS JANNASCHII (STRAIN ATCC 43067 / DSM 2661 / JAL-1 / JCM 10045 / NBRC 100440); ORGANISM_TAXID: 243232	01-JUL-21	12-OCT-21	n/a	10601.8	0.757	7.97	0.08	0.847	0.0011	2.69	0.0036	17.3	0.27	38.1	13.99	3.49	2.21	90.8	0	92.56	1.41636
Q80ZU4-F1	AF-Q80ZU4-F1-model_v1	ALPHAFOLD V2.0 PREDICTION FOR SMALL INTEGRAL MEMBRANE PROTEIN 19 (Q80ZU4)	MOL_ID: 1; ORGANISM_SCIENTIFIC: MUS MUSCULUS; ORGANISM_TAXID: 10090	01-JUL-21	12-OCT-21	n/a	12284.2	0.732	6.8	0.069	0.922	0.0013	3.15	0.0044	25.1	0.4	44.6	17.55	3.96	2.64	50	0	62.35	1.41587
A0A2R8RI13-F1	AF-A0A2R8RI13-F1-model_v1	ALPHAFOLD V2.0 PREDICTION FOR UNCHARACTERIZED PROTEIN (A0A2R8RI13)	MOL_ID: 1; ORGANISM_SCIENTIFIC: DANIO RERIO; ORGANISM_TAXID: 7955	01-JUL-21	12-OCT-21	n/a	32982.6	0.738	5.16	0.052	1.84	0.0024	4.16	0.0053	19.6	0.31	58.9	19.74	5.37	4.74	53.6	11.9	88.06	1.41587
A0A0P0WYS5-F1	AF-A0A0P0WYS5-F1-model_v1	ALPHAFOLD V2.0 PREDICTION FOR OS06G0620100 PROTEIN (A0A0P0WYS5)	MOL_ID: 1; ORGANISM_SCIENTIFIC: ORYZA SATIVA SUBSP. JAPONICA; ORGANISM_TAXID: 39947	01-JUL-21	12-OCT-21	n/a	8183.8	0.712	7.87	0.079	0.765	0.001	2.72	0.0036	23.2	0.37	38.5	13.86	4.62	2.45	53.9	0	55.09	1.41544
F6ZGD5-F1	AF-F6ZGD5-F1-model_v1	ALPHAFOLD V2.0 PREDICTION FOR PREDICTED GENE 11020 (F6ZGD5)	MOL_ID: 1; ORGANISM_SCIENTIFIC: MUS MUSCULUS; ORGANISM_TAXID: 10090	01-JUL-21	12-OCT-21	n/a	6806.5	0.762	9.35	0.094	0.625	0.00084	2.29	0.0031	16.5	0.26	32.4	12.05	2.3	2.28	61.7	0	64.53	1.41485
A5WVU9-F1	AF-A5WVU9-F1-model_v1	ALPHAFOLD V2.0 PREDICTION FOR TRIPLE QXXK/R MOTIF-CONTAINING PROTEIN (A5WVU9)	MOL_ID: 1; ORGANISM_SCIENTIFIC: DANIO RERIO; ORGANISM_TAXID: 7955	01-JUL-21	12-OCT-21	n/a	9506.7	0.76	8.29	0.084	0.781	0.001	2.58	0.0034	16.3	0.26	36.5	12.54	4.01	2.76	83.1	0	78.49	1.41473
Q9Y5F2-F1	AF-Q9Y5F2-F1-model_v1	ALPHAFOLD V2.0 PREDICTION FOR PROTOCADHERIN BETA-11 (Q9Y5F2)	MOL_ID: 1; ORGANISM_SCIENTIFIC: HOMO SAPIENS; ORGANISM_TAXID: 9606	01-JUL-21	12-OCT-21	1-26	84105.1	0.737	3.52	0.036	3.21	0.0042	6.08	0.0079	23.6	0.37	86	29.61	12.38	6.82	6.9	30.3	83.47	1.41447
F1Q6A6-F1	AF-F1Q6A6-F1-model_v1	ALPHAFOLD V2.0 PREDICTION FOR COILED-COIL DOMAIN-CONTAINING 180 (F1Q6A6)	MOL_ID: 1; ORGANISM_SCIENTIFIC: DANIO RERIO; ORGANISM_TAXID: 7955	01-JUL-21	12-OCT-21	n/a	125636	0.731	3.03	0.031	4.22	0.0057	7.07	0.0095	26.4	0.42	100	36.29	12.66	8.59	67.3	1.1	75.41	1.41443
Q86TE4-F1	AF-Q86TE4-F1-model_v1	ALPHAFOLD V2.0 PREDICTION FOR LEUCINE ZIPPER PROTEIN 2 (Q86TE4)	MOL_ID: 1; ORGANISM_SCIENTIFIC: HOMO SAPIENS; ORGANISM_TAXID: 9606	01-JUL-21	12-OCT-21	1-19	36877.4	0.735	3.85	0.039	1.55	0.0021	5.56	0.0076	41.9	0.67	78.6	30.13	7.69	6.98	60.1	0	73.62	1.41367
Q6UXH0-F1	AF-Q6UXH0-F1-model_v1	ALPHAFOLD V2.0 PREDICTION FOR ANGIOPOIETIN-LIKE PROTEIN 8 (Q6UXH0)	MOL_ID: 1; ORGANISM_SCIENTIFIC: HOMO SAPIENS; ORGANISM_TAXID: 9606	01-JUL-21	12-OCT-21	1-21	19915.5	0.736	6.32	0.064	1.37	0.0019	3.39	0.0046	18.7	0.3	47.9	17.44	3.99	3.25	90.3	0	86.47	1.41298
I1LKU4-F1	AF-I1LKU4-F1-model_v1	ALPHAFOLD V2.0 PREDICTION FOR UNCHARACTERIZED PROTEIN (I1LKU4)	MOL_ID: 1; ORGANISM_SCIENTIFIC: GLYCINE MAX; ORGANISM_TAXID: 3847	01-JUL-21	12-OCT-21	n/a	82011.7	0.739	2.61	0.026	2.3	0.0032	8.21	0.011	60.9	0.98	116	44.63	14.23	6.91	70.3	0	74.95	1.41291
Q9VKE2-F1	AF-Q9VKE2-F1-model_v1	ALPHAFOLD V2.0 PREDICTION FOR CRYSTALLIN, ISOFORM A (Q9VKE2)	MOL_ID: 1; ORGANISM_SCIENTIFIC: DROSOPHILA MELANOGASTER; ORGANISM_TAXID: 7227	01-JUL-21	12-OCT-21	1-20	53641	0.711	3.88	0.039	2.48	0.0032	5.53	0.0071	26.3	0.42	78.1	25.55	8.6	6.17	42.5	9.7	67.37	1.4123
B0S6S0-F1	AF-B0S6S0-F1-model_v1	ALPHAFOLD V2.0 PREDICTION FOR FINTRIM FAMILY, MEMBER 26 (B0S6S0)	MOL_ID: 1; ORGANISM_SCIENTIFIC: DANIO RERIO; ORGANISM_TAXID: 7955	01-JUL-21	12-OCT-21	n/a	41109.7	0.728	4.7	0.047	2.16	0.0027	4.56	0.0058	20.3	0.32	64.4	19.61	11.14	3.78	57.4	4.5	88.95	1.41228
E7F3N3-F1	AF-E7F3N3-F1-model_v1	ALPHAFOLD V2.0 PREDICTION FOR C1Q AND TNF-RELATED 7 (E7F3N3)	MOL_ID: 1; ORGANISM_SCIENTIFIC: DANIO RERIO; ORGANISM_TAXID: 7955	01-JUL-21	12-OCT-21	1-16	28813.2	0.73	5.32	0.054	1.7	0.0023	4.03	0.0054	21.9	0.35	56.9	20.54	7.07	4.23	4.1	21.9	78.43	1.41191
O97178-F1	AF-O97178-F1-model_v1	ALPHAFOLD V2.0 PREDICTION FOR ENHANCER OF SPLIT MALPHA PROTEIN (O97178)	MOL_ID: 1; ORGANISM_SCIENTIFIC: DROSOPHILA MELANOGASTER; ORGANISM_TAXID: 7227	01-JUL-21	12-OCT-21	n/a	15871.1	0.725	6.3	0.064	1.13	0.0014	3.4	0.0043	21.7	0.34	48	14.79	8.1	4.27	48.9	9.5	70.77	1.41176
E9AHD1-F1	AF-E9AHD1-F1-model_v1	ALPHAFOLD V2.0 PREDICTION FOR HYPOTHETICAL_PROTEIN_-_CONSERVED (E9AHD1)	MOL_ID: 1; ORGANISM_SCIENTIFIC: LEISHMANIA INFANTUM; ORGANISM_TAXID: 5671	01-JUL-21	12-OCT-21	n/a	54187.9	0.722	3.49	0.035	2.17	0.0029	6.13	0.0081	38.2	0.61	86.5	31.6	8.29	6	77.4	0	78.06	1.41109
O08632-F1	AF-O08632-F1-model_v1	ALPHAFOLD V2.0 PREDICTION FOR KERATIN-ASSOCIATED PROTEIN 19-5 (O08632)	MOL_ID: 1; ORGANISM_SCIENTIFIC: MUS MUSCULUS; ORGANISM_TAXID: 10090	01-JUL-21	12-OCT-21	n/a	6693	0.704	8.49	0.086	0.693	0.00091	2.53	0.0033	21.8	0.34	35.7	12.53	3.47	3.03	0	0	51.48	1.41107
O95229-F1	AF-O95229-F1-model_v1	ALPHAFOLD V2.0 PREDICTION FOR ZW10 INTERACTOR (O95229)	MOL_ID: 1; ORGANISM_SCIENTIFIC: HOMO SAPIENS; ORGANISM_TAXID: 9606	01-JUL-21	12-OCT-21	n/a	31288.8	0.736	4.54	0.046	1.55	0.002	4.72	0.0061	28.7	0.45	66.6	23.12	8.49	4.82	71.7	0	78.3	1.41102
A0A1D6LG50-F1	AF-A0A1D6LG50-F1-model_v1	ALPHAFOLD V2.0 PREDICTION FOR UNCHARACTERIZED PROTEIN (A0A1D6LG50)	MOL_ID: 1; ORGANISM_SCIENTIFIC: ZEA MAYS; ORGANISM_TAXID: 4577	01-JUL-21	12-OCT-21	n/a	3732.1	0.707	11.7	0.12	0.528	0.00069	1.83	0.0024	15	0.24	25.8	9.42	2.31	1.86	0	0	66.51	1.40984
A0A0R0EM41-F1	AF-A0A0R0EM41-F1-model_v1	ALPHAFOLD V2.0 PREDICTION FOR UNCHARACTERIZED PROTEIN (A0A0R0EM41)	MOL_ID: 1; ORGANISM_SCIENTIFIC: GLYCINE MAX; ORGANISM_TAXID: 3847	01-JUL-21	12-OCT-21	1-29	6193.5	0.727	9.45	0.095	0.659	0.00086	2.27	0.003	17.2	0.27	32	10.69	3.85	2.82	31	0	72.64	1.40969
Q09954-F1	AF-Q09954-F1-model_v1	ALPHAFOLD V2.0 PREDICTION FOR UNCHARACTERIZED PROTEIN F59B10.6 (Q09954)	MOL_ID: 1; ORGANISM_SCIENTIFIC: CAENORHABDITIS ELEGANS; ORGANISM_TAXID: 6239	01-JUL-21	12-OCT-21	n/a	12267.5	0.75	7.77	0.078	0.982	0.0013	2.76	0.0036	15.5	0.24	38.9	13.42	3.6	2.36	81.7	0	81.35	1.40942
Q3UQS2-F1	AF-Q3UQS2-F1-model_v1	ALPHAFOLD V2.0 PREDICTION FOR LEUCINE-RICH SINGLE-PASS MEMBRANE PROTEIN 1 (Q3UQS2)	MOL_ID: 1; ORGANISM_SCIENTIFIC: MUS MUSCULUS; ORGANISM_TAXID: 10090	01-JUL-21	12-OCT-21	n/a	14185	0.74	6.27	0.063	0.954	0.0013	3.42	0.0048	26.5	0.43	48.2	18.63	5.26	3.42	58.3	0	68.43	1.40936
K7KRR4-F1	AF-K7KRR4-F1-model_v1	ALPHAFOLD V2.0 PREDICTION FOR MADS-BOX DOMAIN-CONTAINING PROTEIN (K7KRR4)	MOL_ID: 1; ORGANISM_SCIENTIFIC: GLYCINE MAX; ORGANISM_TAXID: 3847	01-JUL-21	12-OCT-21	n/a	20133.3	0.737	5.76	0.058	1.26	0.0016	3.72	0.0048	23.5	0.37	52.4	16.73	6.53	4.64	60.8	5.7	85.32	1.4086
D3ZQY5-F1	AF-D3ZQY5-F1-model_v1	ALPHAFOLD V2.0 PREDICTION FOR PROTOCADHERIN GAMMA SUBFAMILY A, 8 (D3ZQY5)	MOL_ID: 1; ORGANISM_SCIENTIFIC: RATTUS NORVEGICUS; ORGANISM_TAXID: 10116	01-JUL-21	12-OCT-21	1-24	85648.4	0.737	3.51	0.035	3.26	0.0042	6.1	0.0079	23.6	0.37	85.9	29.43	11.63	7.37	8.6	29.1	82.08	1.4082
K7LEX2-F1	AF-K7LEX2-F1-model_v1	ALPHAFOLD V2.0 PREDICTION FOR UNCHARACTERIZED PROTEIN (K7LEX2)	MOL_ID: 1; ORGANISM_SCIENTIFIC: GLYCINE MAX; ORGANISM_TAXID: 3847	01-JUL-21	12-OCT-21	n/a	11966.9	0.749	7.74	0.078	0.959	0.0012	2.77	0.0036	15.8	0.25	39	12.82	3.99	2.98	88	0	88.51	1.40794
Q4E4Q5-F1	AF-Q4E4Q5-F1-model_v1	ALPHAFOLD V2.0 PREDICTION FOR UNCHARACTERIZED PROTEIN (Q4E4Q5)	MOL_ID: 1; ORGANISM_SCIENTIFIC: TRYPANOSOMA CRUZI (STRAIN CL BRENER); ORGANISM_TAXID: 353153	01-JUL-21	12-OCT-21	n/a	71247.8	0.735	3.38	0.034	2.63	0.0034	6.33	0.0083	31.7	0.5	89.1	29.74	9.65	7.01	78.7	0	70.8	1.40758
K7MZ13-F1	AF-K7MZ13-F1-model_v1	ALPHAFOLD V2.0 PREDICTION FOR UNCHARACTERIZED PROTEIN (K7MZ13)	MOL_ID: 1; ORGANISM_SCIENTIFIC: GLYCINE MAX; ORGANISM_TAXID: 3847	01-JUL-21	12-OCT-21	n/a	5933.5	0.733	8.47	0.085	0.553	0.00072	2.53	0.0033	24.4	0.39	35.6	11.37	6.5	2.58	0	0	77.89	1.40711
A0A1D6MTF7-F1	AF-A0A1D6MTF7-F1-model_v1	ALPHAFOLD V2.0 PREDICTION FOR UNCHARACTERIZED PROTEIN (A0A1D6MTF7)	MOL_ID: 1; ORGANISM_SCIENTIFIC: ZEA MAYS; ORGANISM_TAXID: 4577	01-JUL-21	12-OCT-21	1-16	14011.4	0.733	5.77	0.058	0.89	0.0012	3.71	0.0049	33.8	0.54	52.2	16.57	8.9	5.39	41.6	0	53.99	1.40701
A0A0R0IQF7-F1	AF-A0A0R0IQF7-F1-model_v1	ALPHAFOLD V2.0 PREDICTION FOR UNCHARACTERIZED PROTEIN (A0A0R0IQF7)	MOL_ID: 1; ORGANISM_SCIENTIFIC: GLYCINE MAX; ORGANISM_TAXID: 3847	01-JUL-21	12-OCT-21	n/a	9583.6	0.754	8.32	0.084	0.809	0.0011	2.58	0.0034	17	0.27	36.3	13.38	3.5	2.33	81	0	69.91	1.40698
Q9Y5L2-F1	AF-Q9Y5L2-F1-model_v1	ALPHAFOLD V2.0 PREDICTION FOR HYPOXIA-INDUCIBLE LIPID DROPLET-ASSOCIATED PROTEIN (Q9Y5L2)	MOL_ID: 1; ORGANISM_SCIENTIFIC: HOMO SAPIENS; ORGANISM_TAXID: 9606	01-JUL-21	12-OCT-21	n/a	6951.6	0.748	9.16	0.092	0.661	0.0009	2.34	0.0032	17.4	0.28	32.9	12.34	3.08	2.38	54.8	0	72.84	1.40598
A0A0P0WEA1-F1	AF-A0A0P0WEA1-F1-model_v1	ALPHAFOLD V2.0 PREDICTION FOR OS04G0601200 PROTEIN (A0A0P0WEA1)	MOL_ID: 1; ORGANISM_SCIENTIFIC: ORYZA SATIVA SUBSP. JAPONICA; ORGANISM_TAXID: 39947	01-JUL-21	12-OCT-21	n/a	8509.7	0.727	7.49	0.076	0.717	0.001	2.86	0.004	26	0.42	40.2	15.99	4.53	2.59	24.4	0	55.95	1.40559
Q629K1-F1	AF-Q629K1-F1-model_v1	ALPHAFOLD V2.0 PREDICTION FOR TRIPLE QXXK/R MOTIF-CONTAINING PROTEIN (Q629K1)	MOL_ID: 1; ORGANISM_SCIENTIFIC: HOMO SAPIENS; ORGANISM_TAXID: 9606	01-JUL-21	12-OCT-21	n/a	9688.9	0.76	8.03	0.081	0.77	0.001	2.67	0.0035	18.1	0.29	37.5	12.76	4.17	3.01	70.6	0	74.05	1.40449
Q58862-F1	AF-Q58862-F1-model_v1	ALPHAFOLD V2.0 PREDICTION FOR UNCHARACTERIZED PROTEIN MJ1467 (Q58862)	MOL_ID: 1; ORGANISM_SCIENTIFIC: METHANOCALDOCOCCUS JANNASCHII (STRAIN ATCC 43067 / DSM 2661 / JAL-1 / JCM 10045 / NBRC 100440); ORGANISM_TAXID: 243232	01-JUL-21	12-OCT-21	n/a	21003	0.757	6.52	0.066	1.37	0.0018	3.29	0.0043	15.6	0.25	46.2	16.03	4.28	3.64	43.7	21.9	82.45	1.40426
A0A0R0F6L5-F1	AF-A0A0R0F6L5-F1-model_v1	ALPHAFOLD V2.0 PREDICTION FOR UNCHARACTERIZED PROTEIN (A0A0R0F6L5)	MOL_ID: 1; ORGANISM_SCIENTIFIC: GLYCINE MAX; ORGANISM_TAXID: 3847	01-JUL-21	12-OCT-21	n/a	19547.3	0.747	6.51	0.066	1.33	0.0018	3.29	0.0044	18.1	0.29	46.2	17.74	3.92	3.28	56.4	16.9	84.49	1.40426
F1QWR6-F1	AF-F1QWR6-F1-model_v1	ALPHAFOLD V2.0 PREDICTION FOR PROTOCADHERIN 2 ALPHA B 11 (F1QWR6)	MOL_ID: 1; ORGANISM_SCIENTIFIC: DANIO RERIO; ORGANISM_TAXID: 7955	01-JUL-21	12-OCT-21	1-27	83254.8	0.735	3.55	0.036	3.23	0.0042	6.04	0.0079	22.7	0.36	84.8	28.88	12.91	6.24	5.8	29.9	83.37	1.40397
Q4D0M3-F1	AF-Q4D0M3-F1-model_v1	ALPHAFOLD V2.0 PREDICTION FOR UNCHARACTERIZED PROTEIN (Q4D0M3)	MOL_ID: 1; ORGANISM_SCIENTIFIC: TRYPANOSOMA CRUZI (STRAIN CL BRENER); ORGANISM_TAXID: 353153	01-JUL-21	12-OCT-21	n/a	108708	0.72	2.47	0.025	3.09	0.0043	8.69	0.012	55.9	0.89	122	48.73	9.78	9.01	82.7	0	74.18	1.40391
Q18480-F1	AF-Q18480-F1-model_v1	ALPHAFOLD V2.0 PREDICTION FOR COL_CUTICLE_N DOMAIN-CONTAINING PROTEIN (Q18480)	MOL_ID: 1; ORGANISM_SCIENTIFIC: CAENORHABDITIS ELEGANS; ORGANISM_TAXID: 6239	01-JUL-21	12-OCT-21	n/a	28537.2	0.715	4.72	0.048	1.58	0.0023	4.54	0.0065	31.6	0.51	63.7	24.57	8.33	4.99	23.1	0	59.18	1.40308
Q8BXZ0-F1	AF-Q8BXZ0-F1-model_v1	ALPHAFOLD V2.0 PREDICTION FOR CORTEXIN-3 (Q8BXZ0)	MOL_ID: 1; ORGANISM_SCIENTIFIC: MUS MUSCULUS; ORGANISM_TAXID: 10090	01-JUL-21	12-OCT-21	n/a	8830.7	0.75	8.14	0.082	0.741	0.001	2.63	0.0037	20.7	0.33	36.9	14.96	3.45	3.08	51.9	0	70.67	1.40304
Q8LAF5-F1	AF-Q8LAF5-F1-model_v1	ALPHAFOLD V2.0 PREDICTION FOR AT4G19350 (Q8LAF5)	MOL_ID: 1; ORGANISM_SCIENTIFIC: ARABIDOPSIS THALIANA; ORGANISM_TAXID: 3702	01-JUL-21	12-OCT-21	n/a	20539.4	0.736	5.96	0.06	1.33	0.0018	3.6	0.0049	20.8	0.33	50.5	19.11	5.79	3.63	74.9	0	85.98	1.40278
Q08E93-F1	AF-Q08E93-F1-model_v1	ALPHAFOLD V2.0 PREDICTION FOR PROTEIN FAM27E3 (Q08E93)	MOL_ID: 1; ORGANISM_SCIENTIFIC: HOMO SAPIENS; ORGANISM_TAXID: 9606	01-JUL-21	12-OCT-21	n/a	13528.3	0.711	6.43	0.065	1.04	0.0014	3.33	0.0045	24.7	0.39	46.7	17.95	5.64	3.75	47.3	0	67.42	1.4024
Q8T983-F1	AF-Q8T983-F1-model_v1	ALPHAFOLD V2.0 PREDICTION FOR AT08725P (Q8T983)	MOL_ID: 1; ORGANISM_SCIENTIFIC: DROSOPHILA MELANOGASTER; ORGANISM_TAXID: 7227	01-JUL-21	12-OCT-21	n/a	9001.6	0.708	8.21	0.083	0.889	0.0011	2.61	0.0033	17.3	0.27	36.6	12.62	3.88	2.92	10.1	0	73.09	1.4023
Q9UPN4-F1	AF-Q9UPN4-F1-model_v1	ALPHAFOLD V2.0 PREDICTION FOR CENTROSOMAL PROTEIN OF 131 KDA (Q9UPN4)	MOL_ID: 1; ORGANISM_SCIENTIFIC: HOMO SAPIENS; ORGANISM_TAXID: 9606	01-JUL-21	12-OCT-21	n/a	122182	0.725	2.19	0.022	3.04	0.0044	9.77	0.014	78.6	1.28	137	55.11	16.21	11.77	59.3	0	65.55	1.40225
D4ADT0-F1	AF-D4ADT0-F1-model_v1	ALPHAFOLD V2.0 PREDICTION FOR RCG37011 (D4ADT0)	MOL_ID: 1; ORGANISM_SCIENTIFIC: RATTUS NORVEGICUS; ORGANISM_TAXID: 10116	01-JUL-21	12-OCT-21	n/a	32234	0.73	4.37	0.044	1.57	0.0021	4.9	0.0066	33.1	0.53	68.7	25.19	9.12	3.62	90.5	0	84.03	1.40204
F1R8B9-F1	AF-F1R8B9-F1-model_v1	ALPHAFOLD V2.0 PREDICTION FOR SI:DKEY-69C1.1 (F1R8B9)	MOL_ID: 1; ORGANISM_SCIENTIFIC: DANIO RERIO; ORGANISM_TAXID: 7955	01-JUL-21	12-OCT-21	n/a	20763.5	0.719	5.48	0.055	1.32	0.0018	3.91	0.0052	26.8	0.42	54.8	20.79	6.16	3.95	64.9	0	75.14	1.40153
Q4LEZ3-F1	AF-Q4LEZ3-F1-model_v1	ALPHAFOLD V2.0 PREDICTION FOR ALANINE AND ARGININE-RICH DOMAIN-CONTAINING PROTEIN (Q4LEZ3)	MOL_ID: 1; ORGANISM_SCIENTIFIC: HOMO SAPIENS; ORGANISM_TAXID: 9606	01-JUL-21	12-OCT-21	n/a	17575.8	0.726	5.73	0.058	1.14	0.0016	3.74	0.0051	27.9	0.45	52.4	19.98	5.46	5.15	66.9	0	77.78	1.40107
F1QQT3-F1	AF-F1QQT3-F1-model_v1	ALPHAFOLD V2.0 PREDICTION FOR LIM DOMAIN-CONTAINING PROTEIN (F1QQT3)	MOL_ID: 1; ORGANISM_SCIENTIFIC: DANIO RERIO; ORGANISM_TAXID: 7955	01-JUL-21	12-OCT-21	n/a	38339.3	0.729	5.3	0.053	2.27	0.0029	4.04	0.0051	15.3	0.24	56.6	18.74	6.62	4.23	16.7	14.9	86.94	1.40099
Q8WWB3-F1	AF-Q8WWB3-F1-model_v1	ALPHAFOLD V2.0 PREDICTION FOR DPY30 DOMAIN-CONTAINING PROTEIN 1 (Q8WWB3)	MOL_ID: 1; ORGANISM_SCIENTIFIC: HOMO SAPIENS; ORGANISM_TAXID: 9606	01-JUL-21	12-OCT-21	n/a	20881.4	0.736	5.76	0.058	1.31	0.0017	3.72	0.0048	20.9	0.33	52.1	17.15	5.24	3.59	73.3	0	83.02	1.40054
Q969J3-F1	AF-Q969J3-F1-model_v1	ALPHAFOLD V2.0 PREDICTION FOR BLOC-1-RELATED COMPLEX SUBUNIT 5 (Q969J3)	MOL_ID: 1; ORGANISM_SCIENTIFIC: HOMO SAPIENS; ORGANISM_TAXID: 9606	01-JUL-21	12-OCT-21	n/a	22224.4	0.734	5.2	0.052	1.27	0.0016	4.12	0.0052	26.9	0.42	57.7	18.66	7.36	6.82	52.8	0	79.53	1.40049
Q07927-F1	AF-Q07927-F1-model_v1	ALPHAFOLD V2.0 PREDICTION FOR UNCHARACTERIZED PROTEIN YLR012C (Q07927)	MOL_ID: 1; ORGANISM_SCIENTIFIC: SACCHAROMYCES CEREVISIAE (STRAIN ATCC 204508 / S288C); ORGANISM_TAXID: 559292	01-JUL-21	12-OCT-21	n/a	12081.4	0.73	7.66	0.077	1.03	0.0013	2.8	0.0036	16.5	0.26	39.2	13.56	3.54	3.12	71.4	0	66.47	1.4
A0A0R4IL81-F1	AF-A0A0R4IL81-F1-model_v1	ALPHAFOLD V2.0 PREDICTION FOR SI:DKEY-248E17.5 (A0A0R4IL81)	MOL_ID: 1; ORGANISM_SCIENTIFIC: DANIO RERIO; ORGANISM_TAXID: 7955	01-JUL-21	12-OCT-21	n/a	12951.6	0.725	7.51	0.076	1.1	0.0015	2.85	0.0038	16.5	0.26	39.9	14.58	3.39	3.01	61.5	0	81.57	1.4
C6S3H9-F1	AF-C6S3H9-F1-model_v1	ALPHAFOLD V2.0 PREDICTION FOR CYTOCHROME C OXIDASE ASSEMBLY PROTEIN COX14, PUTATIVE (C6S3H9)	MOL_ID: 1; ORGANISM_SCIENTIFIC: PLASMODIUM FALCIPARUM (ISOLATE 3D7); ORGANISM_TAXID: 36329	01-JUL-21	12-OCT-21	n/a	11498	0.745	8.25	0.083	0.998	0.0012	2.6	0.0033	13.5	0.21	36.4	11.94	3.48	3.22	80.4	0	89.18	1.4
K7M9L2-F1	AF-K7M9L2-F1-model_v1	ALPHAFOLD V2.0 PREDICTION FOR UNCHARACTERIZED PROTEIN (K7M9L2)	MOL_ID: 1; ORGANISM_SCIENTIFIC: GLYCINE MAX; ORGANISM_TAXID: 3847	01-JUL-21	12-OCT-21	n/a	68964.2	0.73	2.91	0.029	2.23	0.003	7.36	0.01	53.1	0.85	103	35.63	14.41	6.42	73.9	0	77.67	1.39946
E7FAU6-F1	AF-E7FAU6-F1-model_v1	ALPHAFOLD V2.0 PREDICTION FOR PROTOCADHERIN B (E7FAU6)	MOL_ID: 1; ORGANISM_SCIENTIFIC: DANIO RERIO; ORGANISM_TAXID: 7955	01-JUL-21	12-OCT-21	1-23	88145.4	0.739	3.53	0.036	3.35	0.0045	6.07	0.0081	22.5	0.36	84.9	29.53	12.98	7.23	8.2	31.8	81.97	1.39868
D3ZXN7-F1	AF-D3ZXN7-F1-model_v1	ALPHAFOLD V2.0 PREDICTION FOR RCG21776 (D3ZXN7)	MOL_ID: 1; ORGANISM_SCIENTIFIC: RATTUS NORVEGICUS; ORGANISM_TAXID: 10116	01-JUL-21	12-OCT-21	n/a	22525.8	0.727	5.3	0.053	1.34	0.0018	4.04	0.0054	26.9	0.43	56.5	20.79	7.17	4.65	0	31	61.01	1.39851
A0A0P0X7A0-F1	AF-A0A0P0X7A0-F1-model_v1	ALPHAFOLD V2.0 PREDICTION FOR OS07G0536350 PROTEIN (A0A0P0X7A0)	MOL_ID: 1; ORGANISM_SCIENTIFIC: ORYZA SATIVA SUBSP. JAPONICA; ORGANISM_TAXID: 39947	01-JUL-21	12-OCT-21	n/a	9409	0.741	8.22	0.083	0.826	0.0011	2.61	0.0035	17.3	0.27	36.5	13.31	4.33	2.72	76.5	0	71.25	1.39847
G3V8N4-F1	AF-G3V8N4-F1-model_v1	ALPHAFOLD V2.0 PREDICTION FOR PROTOCADHERIN BETA-6-LIKE (G3V8N4)	MOL_ID: 1; ORGANISM_SCIENTIFIC: RATTUS NORVEGICUS; ORGANISM_TAXID: 10116	01-JUL-21	12-OCT-21	n/a	88043.5	0.736	3.38	0.034	3.23	0.0043	6.35	0.0085	25.5	0.41	88.8	29.49	11.65	9.88	8.2	28.7	81.59	1.39843
Q54HN4-F1	AF-Q54HN4-F1-model_v1	ALPHAFOLD V2.0 PREDICTION FOR PUTATIVE MEDIATOR OF RNA POLYMERASE II TRANSCRIPTION SUBUNIT 21 (Q54HN4)	MOL_ID: 1; ORGANISM_SCIENTIFIC: DICTYOSTELIUM DISCOIDEUM; ORGANISM_TAXID: 44689	01-JUL-21	12-OCT-21	n/a	23221	0.716	5.66	0.057	1.54	0.0021	3.79	0.0051	21.7	0.35	53	20.02	6.19	2.88	72.5	0	86.33	1.39842
Q8WW24-F1	AF-Q8WW24-F1-model_v1	ALPHAFOLD V2.0 PREDICTION FOR TEKTIN-4 (Q8WW24)	MOL_ID: 1; ORGANISM_SCIENTIFIC: HOMO SAPIENS; ORGANISM_TAXID: 9606	01-JUL-21	12-OCT-21	n/a	50650.8	0.724	4.49	0.045	2.59	0.0036	4.77	0.0066	20.8	0.33	66.7	26.04	4.41	4.19	80	0	91.01	1.39832
Q7XDU8-F1	AF-Q7XDU8-F1-model_v1	ALPHAFOLD V2.0 PREDICTION FOR GRF ZINC FINGER FAMILY PROTEIN, EXPRESSED (Q7XDU8)	MOL_ID: 1; ORGANISM_SCIENTIFIC: ORYZA SATIVA SUBSP. JAPONICA; ORGANISM_TAXID: 39947	01-JUL-21	12-OCT-21	n/a	20256.6	0.733	6.43	0.065	1.43	0.0019	3.34	0.0044	16.1	0.26	46.7	16.43	6.64	3.05	54.5	4.5	90.1	1.3982
Q54J90-F1	AF-Q54J90-F1-model_v1	ALPHAFOLD V2.0 PREDICTION FOR UNCHARACTERIZED PROTEIN DDB_G0288213 (Q54J90)	MOL_ID: 1; ORGANISM_SCIENTIFIC: DICTYOSTELIUM DISCOIDEUM; ORGANISM_TAXID: 44689	01-JUL-21	12-OCT-21	n/a	11650.2	0.726	7.17	0.072	0.943	0.0013	2.99	0.0041	21.7	0.35	41.8	14.76	6.02	2.99	73.4	0	67.19	1.39799
Q655V4-F1	AF-Q655V4-F1-model_v1	ALPHAFOLD V2.0 PREDICTION FOR MADS-BOX TRANSCRIPTION FACTOR 30 (Q655V4)	MOL_ID: 1; ORGANISM_SCIENTIFIC: ORYZA SATIVA SUBSP. JAPONICA; ORGANISM_TAXID: 39947	01-JUL-21	12-OCT-21	n/a	25786	0.739	5.47	0.055	1.52	0.0019	3.92	0.0049	20.4	0.32	54.8	16.86	10	3.93	70	8.2	90.22	1.39796
K7V3D5-F1	AF-K7V3D5-F1-model_v1	ALPHAFOLD V2.0 PREDICTION FOR UNCHARACTERIZED PROTEIN (K7V3D5)	MOL_ID: 1; ORGANISM_SCIENTIFIC: ZEA MAYS; ORGANISM_TAXID: 4577	01-JUL-21	12-OCT-21	n/a	30384.8	0.744	4.95	0.05	1.59	0.0021	4.33	0.0057	24.9	0.39	60.5	20.79	8.47	5.24	66	2.3	78.97	1.39723
P38311-F1	AF-P38311-F1-model_v1	ALPHAFOLD V2.0 PREDICTION FOR UNCHARACTERIZED PROTEIN YBR209W (P38311)	MOL_ID: 1; ORGANISM_SCIENTIFIC: SACCHAROMYCES CEREVISIAE (STRAIN ATCC 204508 / S288C); ORGANISM_TAXID: 559292	01-JUL-21	12-OCT-21	n/a	12142.7	0.742	7.59	0.077	0.98	0.0013	2.82	0.0037	16.8	0.27	39.4	14.05	3.38	2.85	79.8	0	68.84	1.39716
Q80ZS3-F1	AF-Q80ZS3-F1-model_v1	ALPHAFOLD V2.0 PREDICTION FOR 28S RIBOSOMAL PROTEIN S26, MITOCHONDRIAL (Q80ZS3)	MOL_ID: 1; ORGANISM_SCIENTIFIC: MUS MUSCULUS; ORGANISM_TAXID: 10090	01-JUL-21	12-OCT-21	n/a	23456.3	0.734	5.18	0.052	1.33	0.0016	4.13	0.0051	25.2	0.39	57.7	17.86	8.14	7.29	63.3	2	89.73	1.39709
Q8TF08-F1	AF-Q8TF08-F1-model_v1	ALPHAFOLD V2.0 PREDICTION FOR CYTOCHROME C OXIDASE SUBUNIT 7B2, MITOCHONDRIAL (Q8TF08)	MOL_ID: 1; ORGANISM_SCIENTIFIC: HOMO SAPIENS; ORGANISM_TAXID: 9606	01-JUL-21	12-OCT-21	n/a	9084	0.738	8.33	0.084	0.817	0.0011	2.57	0.0034	17.5	0.28	35.9	13.09	4.13	2.26	62.5	0	89.79	1.39689
P61574-F1	AF-P61574-F1-model_v1	ALPHAFOLD V2.0 PREDICTION FOR ENDOGENOUS RETROVIRUS GROUP K MEMBER 113 REC PROTEIN (P61574)	MOL_ID: 1; ORGANISM_SCIENTIFIC: HOMO SAPIENS; ORGANISM_TAXID: 9606	01-JUL-21	12-OCT-21	n/a	11930.2	0.735	6.81	0.069	0.888	0.0012	3.15	0.0042	23.5	0.37	44	15.17	6.92	3.08	35.6	0	72.77	1.39683
A0A1D6GN31-F1	AF-A0A1D6GN31-F1-model_v1	ALPHAFOLD V2.0 PREDICTION FOR UNCHARACTERIZED PROTEIN (A0A1D6GN31)	MOL_ID: 1; ORGANISM_SCIENTIFIC: ZEA MAYS; ORGANISM_TAXID: 4577	01-JUL-21	12-OCT-21	1-24	18604.1	0.736	5.55	0.056	1.12	0.0015	3.86	0.0052	29.5	0.47	53.9	19.11	7.3	3.8	42.9	0	54.98	1.39637
E9Q207-F1	AF-E9Q207-F1-model_v1	ALPHAFOLD V2.0 PREDICTION FOR PREDICTED GENE 8267 (E9Q207)	MOL_ID: 1; ORGANISM_SCIENTIFIC: MUS MUSCULUS; ORGANISM_TAXID: 10090	01-JUL-21	12-OCT-21	n/a	31029.4	0.732	4.74	0.048	1.62	0.0022	4.52	0.0061	27.7	0.44	63.1	23.57	5.97	3.85	65	0	71.77	1.39602
I1LQ04-F1	AF-I1LQ04-F1-model_v1	ALPHAFOLD V2.0 PREDICTION FOR UNCHARACTERIZED PROTEIN (I1LQ04)	MOL_ID: 1; ORGANISM_SCIENTIFIC: GLYCINE MAX; ORGANISM_TAXID: 3847	01-JUL-21	12-OCT-21	n/a	26255.7	0.744	5.89	0.059	1.63	0.0022	3.64	0.0049	17.4	0.28	50.8	18.26	4.86	4.72	71.4	7.5	90.81	1.3956
A4IAF2-F1	AF-A4IAF2-F1-model_v1	ALPHAFOLD V2.0 PREDICTION FOR HYPOTHETICAL_PROTEIN_-_CONSERVED (A4IAF2)	MOL_ID: 1; ORGANISM_SCIENTIFIC: LEISHMANIA INFANTUM; ORGANISM_TAXID: 5671	01-JUL-21	12-OCT-21	n/a	26551.3	0.724	5.25	0.053	1.59	0.0021	4.08	0.0055	24	0.38	56.9	19.98	5.72	5.66	76.7	0	78.18	1.39461
Q8IKT0-F1	AF-Q8IKT0-F1-model_v1	ALPHAFOLD V2.0 PREDICTION FOR UNCHARACTERIZED PROTEIN (Q8IKT0)	MOL_ID: 1; ORGANISM_SCIENTIFIC: PLASMODIUM FALCIPARUM (ISOLATE 3D7); ORGANISM_TAXID: 36329	01-JUL-21	12-OCT-21	n/a	17378.1	0.736	5.95	0.06	1.13	0.0014	3.6	0.0045	22.8	0.36	50.2	15.97	6.74	5.88	0	9.2	52.82	1.39444
O76070-F1	AF-O76070-F1-model_v1	ALPHAFOLD V2.0 PREDICTION FOR GAMMA-SYNUCLEIN (O76070)	MOL_ID: 1; ORGANISM_SCIENTIFIC: HOMO SAPIENS; ORGANISM_TAXID: 9606	01-JUL-21	12-OCT-21	n/a	13326.7	0.731	6.66	0.067	0.984	0.0013	3.22	0.0042	22	0.35	44.9	14.76	7.47	2.94	70.6	0	77.81	1.39441
Q9U5C1-F1	AF-Q9U5C1-F1-model_v1	ALPHAFOLD V2.0 PREDICTION FOR RING-TYPE DOMAIN-CONTAINING PROTEIN (Q9U5C1)	MOL_ID: 1; ORGANISM_SCIENTIFIC: CAENORHABDITIS ELEGANS; ORGANISM_TAXID: 6239	01-JUL-21	12-OCT-21	n/a	34154	0.732	5.21	0.053	1.97	0.0026	4.11	0.0054	17.8	0.28	57.3	19.71	7.72	3.96	49	4.1	86.78	1.39416
Q9U3C2-F1	AF-Q9U3C2-F1-model_v1	ALPHAFOLD V2.0 PREDICTION FOR UNCHARACTERIZED PROTEIN (Q9U3C2)	MOL_ID: 1; ORGANISM_SCIENTIFIC: CAENORHABDITIS ELEGANS; ORGANISM_TAXID: 6239	01-JUL-21	12-OCT-21	n/a	18384.8	0.731	6.9	0.07	1.41	0.0019	3.1	0.0041	14.8	0.24	43.2	15.91	3.71	3.32	91.8	0	73.7	1.39355
Q9Y2V7-F1	AF-Q9Y2V7-F1-model_v1	ALPHAFOLD V2.0 PREDICTION FOR CONSERVED OLIGOMERIC GOLGI COMPLEX SUBUNIT 6 (Q9Y2V7)	MOL_ID: 1; ORGANISM_SCIENTIFIC: HOMO SAPIENS; ORGANISM_TAXID: 9606	01-JUL-21	12-OCT-21	n/a	73276.7	0.74	3.81	0.038	2.99	0.0041	5.62	0.0076	23	0.37	78.3	28.36	7.57	5.32	73.6	0	85.74	1.39324
Q564R8-F1	AF-Q564R8-F1-model_v1	ALPHAFOLD V2.0 PREDICTION FOR UNCHARACTERIZED PROTEIN (Q564R8)	MOL_ID: 1; ORGANISM_SCIENTIFIC: CAENORHABDITIS ELEGANS; ORGANISM_TAXID: 6239	01-JUL-21	12-OCT-21	n/a	6547.7	0.755	9.55	0.096	0.632	0.00085	2.24	0.003	16.3	0.26	31.2	11.84	3.46	2.19	53.3	0	72.79	1.39286
Q55CQ2-F1	AF-Q55CQ2-F1-model_v1	ALPHAFOLD V2.0 PREDICTION FOR UNCHARACTERIZED PROTEIN (Q55CQ2)	MOL_ID: 1; ORGANISM_SCIENTIFIC: DICTYOSTELIUM DISCOIDEUM; ORGANISM_TAXID: 44689	01-JUL-21	12-OCT-21	n/a	13876.1	0.706	6.38	0.064	1.07	0.0013	3.36	0.0042	23.9	0.38	46.8	14.94	6.48	4	45	0	70.42	1.39286
A0A0P0WT62-F1	AF-A0A0P0WT62-F1-model_v1	ALPHAFOLD V2.0 PREDICTION FOR OS06G0156801 PROTEIN (A0A0P0WT62)	MOL_ID: 1; ORGANISM_SCIENTIFIC: ORYZA SATIVA SUBSP. JAPONICA; ORGANISM_TAXID: 39947	01-JUL-21	12-OCT-21	n/a	14762.9	0.72	5.43	0.055	0.925	0.0012	3.95	0.0053	37.8	0.6	55	20.39	6.27	5.51	12.4	0	58.51	1.39241
A0A0P0XGQ0-F1	AF-A0A0P0XGQ0-F1-model_v1	ALPHAFOLD V2.0 PREDICTION FOR OS08G0452900 PROTEIN (A0A0P0XGQ0)	MOL_ID: 1; ORGANISM_SCIENTIFIC: ORYZA SATIVA SUBSP. JAPONICA; ORGANISM_TAXID: 39947	01-JUL-21	12-OCT-21	n/a	11387.6	0.73	6.88	0.069	0.872	0.0011	3.11	0.004	23.1	0.36	43.3	13.02	6.09	4.58	43.6	0	62.18	1.39228
Q0VG62-F1	AF-Q0VG62-F1-model_v1	ALPHAFOLD V2.0 PREDICTION FOR RIBOSOMAL BIOGENESIS FACTOR (Q0VG62)	MOL_ID: 1; ORGANISM_SCIENTIFIC: MUS MUSCULUS; ORGANISM_TAXID: 10090	01-JUL-21	12-OCT-21	n/a	11180.2	0.743	7	0.071	0.83	0.0011	3.06	0.0041	23.9	0.38	42.6	15.18	7.36	2.79	54.2	0	78.62	1.39216
Q4CY45-F1	AF-Q4CY45-F1-model_v1	ALPHAFOLD V2.0 PREDICTION FOR UNCHARACTERIZED PROTEIN (Q4CY45)	MOL_ID: 1; ORGANISM_SCIENTIFIC: TRYPANOSOMA CRUZI (STRAIN CL BRENER); ORGANISM_TAXID: 353153	01-JUL-21	12-OCT-21	n/a	27007.7	0.734	4.97	0.05	1.47	0.002	4.31	0.0058	26.6	0.42	60	22.99	5.45	4.41	82.7	0	81.15	1.39211
O42651-F1	AF-O42651-F1-model_v1	ALPHAFOLD V2.0 PREDICTION FOR AUTOPHAGY-RELATED PROTEIN 17 (O42651)	MOL_ID: 1; ORGANISM_SCIENTIFIC: SCHIZOSACCHAROMYCES POMBE (STRAIN 972 / ATCC 24843); ORGANISM_TAXID: 284812	01-JUL-21	12-OCT-21	n/a	47055	0.732	4.77	0.048	2.48	0.0033	4.49	0.006	17.7	0.28	62.5	23.56	6.61	4.35	79.3	0	88.02	1.39198
Q9C010-F1	AF-Q9C010-F1-model_v1	ALPHAFOLD V2.0 PREDICTION FOR CAMP-DEPENDENT PROTEIN KINASE INHIBITOR BETA (Q9C010)	MOL_ID: 1; ORGANISM_SCIENTIFIC: HOMO SAPIENS; ORGANISM_TAXID: 9606	01-JUL-21	12-OCT-21	n/a	8465.4	0.717	7.25	0.073	0.716	0.0009	2.96	0.0037	27	0.43	41.2	11.92	6.83	2.85	10.4	0	63.38	1.39189
Q156A1-F1	AF-Q156A1-F1-model_v1	ALPHAFOLD V2.0 PREDICTION FOR ATAXIN-8 (Q156A1)	MOL_ID: 1; ORGANISM_SCIENTIFIC: HOMO SAPIENS; ORGANISM_TAXID: 9606	01-JUL-21	12-OCT-21	n/a	10273	0.668	8.48	0.086	1.19	0.0016	2.53	0.0033	14.2	0.22	35.2	12.77	1.95	1.96	97.5	0	97.33	1.3913
A0A1D6PN66-F1	AF-A0A1D6PN66-F1-model_v1	ALPHAFOLD V2.0 PREDICTION FOR WALL-ASSOCIATED RECEPTOR KINASE 2 (A0A1D6PN66)	MOL_ID: 1; ORGANISM_SCIENTIFIC: ZEA MAYS; ORGANISM_TAXID: 4577	01-JUL-21	12-OCT-21	1-36	76148.1	0.73	4.53	0.046	3.84	0.0047	4.73	0.0057	11.3	0.18	65.8	20	5.86	6.7	22.8	16.7	87.04	1.39112
A0A0R0GJM5-F1	AF-A0A0R0GJM5-F1-model_v1	ALPHAFOLD V2.0 PREDICTION FOR UNCHARACTERIZED PROTEIN (A0A0R0GJM5)	MOL_ID: 1; ORGANISM_SCIENTIFIC: GLYCINE MAX; ORGANISM_TAXID: 3847	01-JUL-21	12-OCT-21	n/a	3324.5	0.725	12	0.12	0.452	0.00059	1.79	0.0023	15.4	0.24	24.9	9.09	2.04	1.65	0	0	67.91	1.39106
C6T0E1-F1	AF-C6T0E1-F1-model_v1	ALPHAFOLD V2.0 PREDICTION FOR UNCHARACTERIZED PROTEIN (C6T0E1)	MOL_ID: 1; ORGANISM_SCIENTIFIC: GLYCINE MAX; ORGANISM_TAXID: 3847	01-JUL-21	12-OCT-21	n/a	12267.7	0.733	7.53	0.076	1.02	0.0014	2.84	0.0038	17.8	0.28	39.5	14.98	3.59	3.54	82.4	0	68.08	1.39085
Q8QZX2-F1	AF-Q8QZX2-F1-model_v1	ALPHAFOLD V2.0 PREDICTION FOR HAUS AUGMIN-LIKE COMPLEX SUBUNIT 3 (Q8QZX2)	MOL_ID: 1; ORGANISM_SCIENTIFIC: MUS MUSCULUS; ORGANISM_TAXID: 10090	01-JUL-21	12-OCT-21	n/a	66297.5	0.739	3.59	0.036	2.56	0.0034	5.97	0.0079	28.5	0.45	83	29.98	8.56	7.09	74.9	0	78.7	1.39028
A0A1B0GU33-F1	AF-A0A1B0GU33-F1-model_v1	ALPHAFOLD V2.0 PREDICTION FOR TESTIS-EXPRESSED PROTEIN 53 (A0A1B0GU33)	MOL_ID: 1; ORGANISM_SCIENTIFIC: HOMO SAPIENS; ORGANISM_TAXID: 9606	01-JUL-21	12-OCT-21	n/a	8138.9	0.722	7.43	0.075	0.693	0.00083	2.88	0.0034	23.9	0.37	40	11.53	6.7	3.43	0	0	60.41	1.38889
Q9VCN4-F1	AF-Q9VCN4-F1-model_v1	ALPHAFOLD V2.0 PREDICTION FOR AT03545P (Q9VCN4)	MOL_ID: 1; ORGANISM_SCIENTIFIC: DROSOPHILA MELANOGASTER; ORGANISM_TAXID: 7227	01-JUL-21	12-OCT-21	n/a	64600.3	0.734	3.18	0.032	2.25	0.0031	6.75	0.0094	46.4	0.74	93.7	36.3	10.37	8	81.2	0	82.94	1.38815
Q96A05-F1	AF-Q96A05-F1-model_v1	ALPHAFOLD V2.0 PREDICTION FOR V-TYPE PROTON ATPASE SUBUNIT E 2 (Q96A05)	MOL_ID: 1; ORGANISM_SCIENTIFIC: HOMO SAPIENS; ORGANISM_TAXID: 9606	01-JUL-21	12-OCT-21	n/a	26082	0.749	5.85	0.059	1.58	0.0021	3.66	0.0048	17.3	0.27	50.8	17.8	5.16	4.7	71.1	7.6	92.89	1.38798
H3BTG2-F1	AF-H3BTG2-F1-model_v1	ALPHAFOLD V2.0 PREDICTION FOR TESTIS-EXPRESSED PROTEIN 46 (H3BTG2)	MOL_ID: 1; ORGANISM_SCIENTIFIC: HOMO SAPIENS; ORGANISM_TAXID: 9606	01-JUL-21	12-OCT-21	1-38	10084.7	0.73	7.64	0.077	0.857	0.0011	2.81	0.0037	20	0.32	39	13.54	3.89	3.15	54.9	0	65.68	1.3879
A6NLX4-F1	AF-A6NLX4-F1-model_v1	ALPHAFOLD V2.0 PREDICTION FOR TRANSMEMBRANE PROTEIN 210 (A6NLX4)	MOL_ID: 1; ORGANISM_SCIENTIFIC: HOMO SAPIENS; ORGANISM_TAXID: 9606	01-JUL-21	12-OCT-21	1-31	12430.2	0.747	6.15	0.062	0.797	0.0011	3.49	0.0046	29	0.46	48.4	15.9	6.08	5.26	27	0	63.95	1.38682
Q96E16-F1	AF-Q96E16-F1-model_v1	ALPHAFOLD V2.0 PREDICTION FOR SMALL INTEGRAL MEMBRANE PROTEIN 19 (Q96E16)	MOL_ID: 1; ORGANISM_SCIENTIFIC: HOMO SAPIENS; ORGANISM_TAXID: 9606	01-JUL-21	12-OCT-21	n/a	12439.1	0.731	7.15	0.072	0.987	0.0014	3	0.0042	20.9	0.33	41.6	16.17	4.56	3.4	68.9	0	67.06	1.38667
A4D0T2-F1	AF-A4D0T2-F1-model_v1	ALPHAFOLD V2.0 PREDICTION FOR UNCHARACTERIZED PROTEIN C7ORF66 (A4D0T2)	MOL_ID: 1; ORGANISM_SCIENTIFIC: HOMO SAPIENS; ORGANISM_TAXID: 9606	01-JUL-21	12-OCT-21	n/a	13242	0.742	6.57	0.066	0.926	0.0012	3.26	0.0043	23.9	0.38	45.2	16.05	7.67	3.62	73.7	0	72.15	1.3865
Q8N6M8-F1	AF-Q8N6M8-F1-model_v1	ALPHAFOLD V2.0 PREDICTION FOR IQ DOMAIN-CONTAINING PROTEIN F1 (Q8N6M8)	MOL_ID: 1; ORGANISM_SCIENTIFIC: HOMO SAPIENS; ORGANISM_TAXID: 9606	01-JUL-21	12-OCT-21	n/a	23716.9	0.741	5.02	0.051	1.27	0.0016	4.27	0.0055	28.4	0.45	59.2	20.32	6.45	5.8	52	12.2	76.76	1.38642
Q86XR5-F1	AF-Q86XR5-F1-model_v1	ALPHAFOLD V2.0 PREDICTION FOR PROLINE-RICH MEMBRANE ANCHOR 1 (Q86XR5)	MOL_ID: 1; ORGANISM_SCIENTIFIC: HOMO SAPIENS; ORGANISM_TAXID: 9606	01-JUL-21	12-OCT-21	1-35	12678.7	0.741	6.52	0.066	0.883	0.0012	3.29	0.0044	26.1	0.41	45.6	16.68	4.35	4.08	30.8	0	63.34	1.38602
Q3URD3-F1	AF-Q3URD3-F1-model_v1	ALPHAFOLD V2.0 PREDICTION FOR SARCOLEMMAL MEMBRANE-ASSOCIATED PROTEIN (Q3URD3)	MOL_ID: 1; ORGANISM_SCIENTIFIC: MUS MUSCULUS; ORGANISM_TAXID: 10090	01-JUL-21	12-OCT-21	n/a	96919.1	0.733	2.68	0.027	2.86	0.004	8.01	0.011	53.2	0.85	111	46.46	9.69	7.22	65.3	4.5	76.29	1.38577
A0A1P8AYJ3-F1	AF-A0A1P8AYJ3-F1-model_v1	ALPHAFOLD V2.0 PREDICTION FOR PHOSPHOGLUCONATE DEHYDROGENASE (DECARBOXYLATING), NAD-BINDING DOMAIN PROTEIN (A0A1P8AYJ3)	MOL_ID: 1; ORGANISM_SCIENTIFIC: ARABIDOPSIS THALIANA; ORGANISM_TAXID: 3702	01-JUL-21	12-OCT-21	n/a	10126.9	0.761	8.19	0.083	0.818	0.0011	2.62	0.0035	16.3	0.26	36.3	13.24	3.74	2.56	82.6	0	79.13	1.3855
Q9LXM0-F1	AF-Q9LXM0-F1-model_v1	ALPHAFOLD V2.0 PREDICTION FOR PEPTIDYL-PROLYL CIS-TRANS ISOMERASE G (Q9LXM0)	MOL_ID: 1; ORGANISM_SCIENTIFIC: ARABIDOPSIS THALIANA; ORGANISM_TAXID: 3702	01-JUL-21	12-OCT-21	1-19	10534.9	0.733	8.18	0.082	0.949	0.0012	2.62	0.0033	15	0.24	36.3	12.23	3.85	2.3	80.7	0	74.05	1.3855
Q4CKT2-F1	AF-Q4CKT2-F1-model_v1	ALPHAFOLD V2.0 PREDICTION FOR TRANS-SIALIDASE, PUTATIVE (Q4CKT2)	MOL_ID: 1; ORGANISM_SCIENTIFIC: TRYPANOSOMA CRUZI (STRAIN CL BRENER); ORGANISM_TAXID: 353153	01-JUL-21	12-OCT-21	n/a	9365.9	0.721	7.12	0.072	0.766	0.0011	3.01	0.0042	26.9	0.43	41.7	15.49	6.4	3.14	24.1	0	65.24	1.38538
K7MZ31-F1	AF-K7MZ31-F1-model_v1	ALPHAFOLD V2.0 PREDICTION FOR UNCHARACTERIZED PROTEIN (K7MZ31)	MOL_ID: 1; ORGANISM_SCIENTIFIC: GLYCINE MAX; ORGANISM_TAXID: 3847	01-JUL-21	12-OCT-21	1-17	10050.5	0.726	8.67	0.087	0.985	0.0012	2.47	0.0031	13.2	0.21	34.2	11.96	3.39	2.5	80.5	4.9	88.35	1.38462
Q6UWS5-F1	AF-Q6UWS5-F1-model_v1	ALPHAFOLD V2.0 PREDICTION FOR PROTEIN PET117 HOMOLOG, MITOCHONDRIAL (Q6UWS5)	MOL_ID: 1; ORGANISM_SCIENTIFIC: HOMO SAPIENS; ORGANISM_TAXID: 9606	01-JUL-21	12-OCT-21	n/a	9229.5	0.749	8.68	0.088	0.829	0.0011	2.47	0.0033	14.9	0.24	34.2	12.84	2.49	2.23	93.8	0	94.56	1.38462
Q15847-F1	AF-Q15847-F1-model_v1	ALPHAFOLD V2.0 PREDICTION FOR ADIPOGENESIS REGULATORY FACTOR (Q15847)	MOL_ID: 1; ORGANISM_SCIENTIFIC: HOMO SAPIENS; ORGANISM_TAXID: 9606	01-JUL-21	12-OCT-21	n/a	7854.9	0.729	9.17	0.093	0.805	0.0011	2.34	0.0031	14.8	0.23	32.4	11.58	3.52	2.16	94.7	0	74.48	1.38462
Q96B96-F1	AF-Q96B96-F1-model_v1	ALPHAFOLD V2.0 PREDICTION FOR LIPID DROPLET ASSEMBLY FACTOR 1 (Q96B96)	MOL_ID: 1; ORGANISM_SCIENTIFIC: HOMO SAPIENS; ORGANISM_TAXID: 9606	01-JUL-21	12-OCT-21	n/a	17521.5	0.761	6.19	0.062	1.07	0.0014	3.46	0.0044	20.2	0.32	47.9	14.27	6.34	5.93	75	0	80.39	1.38439
Q8CFG9-F1	AF-Q8CFG9-F1-model_v1	ALPHAFOLD V2.0 PREDICTION FOR COMPLEMENT C1R-B SUBCOMPONENT (Q8CFG9)	MOL_ID: 1; ORGANISM_SCIENTIFIC: MUS MUSCULUS; ORGANISM_TAXID: 10090	01-JUL-21	12-OCT-21	1-16	78067.2	0.725	4.36	0.044	3.86	0.0049	4.92	0.0062	13.1	0.21	68.1	22.08	8.63	5.52	5.2	28.9	88.34	1.38415
A0A0R4IDY1-F1	AF-A0A0R4IDY1-F1-model_v1	ALPHAFOLD V2.0 PREDICTION FOR SI:DKEY-93M18.3 (A0A0R4IDY1)	MOL_ID: 1; ORGANISM_SCIENTIFIC: DANIO RERIO; ORGANISM_TAXID: 7955	01-JUL-21	12-OCT-21	n/a	7714	0.716	8.13	0.082	0.734	0.00098	2.63	0.0035	21.1	0.33	36.4	12.65	4.16	2.72	27.7	0	63.93	1.38403
O60687-F1	AF-O60687-F1-model_v1	ALPHAFOLD V2.0 PREDICTION FOR SUSHI REPEAT-CONTAINING PROTEIN SRPX2 (O60687)	MOL_ID: 1; ORGANISM_SCIENTIFIC: HOMO SAPIENS; ORGANISM_TAXID: 9606	01-JUL-21	12-OCT-21	1-23	50453.2	0.72	4.65	0.047	2.71	0.0035	4.61	0.006	17.5	0.28	63.8	21.5	7.98	4.36	12	25.9	89.5	1.38395
A0A1P8AUK9-F1	AF-A0A1P8AUK9-F1-model_v1	ALPHAFOLD V2.0 PREDICTION FOR UNCHARACTERIZED PROTEIN (A0A1P8AUK9)	MOL_ID: 1; ORGANISM_SCIENTIFIC: ARABIDOPSIS THALIANA; ORGANISM_TAXID: 3702	01-JUL-21	12-OCT-21	n/a	9738.2	0.741	8.47	0.085	0.88	0.0012	2.53	0.0034	15.5	0.25	35	13.29	2.32	2.41	91.1	0	80.64	1.3834
Q96EV8-F1	AF-Q96EV8-F1-model_v1	ALPHAFOLD V2.0 PREDICTION FOR DYSBINDIN (Q96EV8)	MOL_ID: 1; ORGANISM_SCIENTIFIC: HOMO SAPIENS; ORGANISM_TAXID: 9606	01-JUL-21	12-OCT-21	n/a	39468.4	0.725	3.86	0.039	1.73	0.0022	5.56	0.0071	36	0.57	76.9	26.63	9.15	9.53	58	0	73.49	1.38309
A0A0P0XC45-F1	AF-A0A0P0XC45-F1-model_v1	ALPHAFOLD V2.0 PREDICTION FOR OS08G0160901 PROTEIN (A0A0P0XC45)	MOL_ID: 1; ORGANISM_SCIENTIFIC: ORYZA SATIVA SUBSP. JAPONICA; ORGANISM_TAXID: 39947	01-JUL-21	12-OCT-21	n/a	8113.6	0.722	8.38	0.085	0.779	0.001	2.56	0.0034	17.8	0.28	35.4	12.87	3.96	3.09	30.9	0	58.22	1.38281
Q9FLL5-F1	AF-Q9FLL5-F1-model_v1	ALPHAFOLD V2.0 PREDICTION FOR MYOSIN HEAVY CHAIN-RELATED PROTEIN (Q9FLL5)	MOL_ID: 1; ORGANISM_SCIENTIFIC: ARABIDOPSIS THALIANA; ORGANISM_TAXID: 3702	01-JUL-21	12-OCT-21	n/a	113111	0.728	2.37	0.024	3.01	0.0041	9.04	0.012	59.1	0.95	125	49.61	13.33	11.43	61.8	5.5	73.1	1.38274
D3ZZP4-F1	AF-D3ZZP4-F1-model_v1	ALPHAFOLD V2.0 PREDICTION FOR PROLINE-RICH MEMBRANE ANCHOR 1 (D3ZZP4)	MOL_ID: 1; ORGANISM_SCIENTIFIC: RATTUS NORVEGICUS; ORGANISM_TAXID: 10116	01-JUL-21	12-OCT-21	1-35	12515.5	0.744	6.62	0.067	0.874	0.0012	3.24	0.0044	25.3	0.4	44.8	15.7	4.84	3.87	30.8	0	64.14	1.38272
A0A0P0XLR7-F1	AF-A0A0P0XLR7-F1-model_v1	ALPHAFOLD V2.0 PREDICTION FOR OS09G0421166 PROTEIN (A0A0P0XLR7)	MOL_ID: 1; ORGANISM_SCIENTIFIC: ORYZA SATIVA SUBSP. JAPONICA; ORGANISM_TAXID: 39947	01-JUL-21	12-OCT-21	n/a	24201.9	0.733	4.93	0.05	1.31	0.0017	4.34	0.0058	29.2	0.46	60	21.72	5.93	6.52	65.9	0	80.13	1.38249
Q54JN2-F1	AF-Q54JN2-F1-model_v1	ALPHAFOLD V2.0 PREDICTION FOR PUTATIVE UNCHARACTERIZED TRANSMEMBRANE PROTEIN DDB_G0287945 (Q54JN2)	MOL_ID: 1; ORGANISM_SCIENTIFIC: DICTYOSTELIUM DISCOIDEUM; ORGANISM_TAXID: 44689	01-JUL-21	12-OCT-21	n/a	8307.8	0.747	9.21	0.093	0.799	0.0011	2.33	0.0031	13.9	0.22	32.2	11.76	2.67	2.06	79.1	0	75.15	1.38197
E0AHA6-F1	AF-E0AHA6-F1-model_v1	ALPHAFOLD V2.0 PREDICTION FOR UNCHARACTERIZED PROTEIN (E0AHA6)	MOL_ID: 1; ORGANISM_SCIENTIFIC: CAENORHABDITIS ELEGANS; ORGANISM_TAXID: 6239	01-JUL-21	12-OCT-21	n/a	7704.4	0.759	8.43	0.085	0.646	0.00084	2.54	0.0033	19.5	0.31	35.1	12.09	4.73	2.49	44.1	0	73.92	1.38189
Q54YH7-F1	AF-Q54YH7-F1-model_v1	ALPHAFOLD V2.0 PREDICTION FOR J DOMAIN-CONTAINING PROTEIN (Q54YH7)	MOL_ID: 1; ORGANISM_SCIENTIFIC: DICTYOSTELIUM DISCOIDEUM; ORGANISM_TAXID: 44689	01-JUL-21	12-OCT-21	n/a	35567	0.722	5.12	0.052	2.09	0.0025	4.19	0.005	16.8	0.26	57.9	17.67	8.07	5.77	53.8	7.3	76.59	1.38186
O70153-F1	AF-O70153-F1-model_v1	ALPHAFOLD V2.0 PREDICTION FOR B29/IG-BETA/CD79B (O70153)	MOL_ID: 1; ORGANISM_SCIENTIFIC: RATTUS NORVEGICUS; ORGANISM_TAXID: 10116	01-JUL-21	12-OCT-21	1-30	22597.2	0.731	5.91	0.06	1.48	0.0019	3.62	0.0048	20	0.32	50	17.92	5.92	3.89	20.8	20.3	77.03	1.38122
A6NCN2-F1	AF-A6NCN2-F1-model_v1	ALPHAFOLD V2.0 PREDICTION FOR PUTATIVE KERATIN-87 PROTEIN (A6NCN2)	MOL_ID: 1; ORGANISM_SCIENTIFIC: HOMO SAPIENS; ORGANISM_TAXID: 9606	01-JUL-21	12-OCT-21	n/a	29117.2	0.73	4.83	0.049	1.56	0.0021	4.44	0.0059	26.2	0.41	61.3	21.51	6.09	4.97	87.8	0	89.09	1.38063
P0CB26-F1	AF-P0CB26-F1-model_v1	ALPHAFOLD V2.0 PREDICTION FOR UNCHARACTERIZED PROTEIN AT1G10890 (P0CB26)	MOL_ID: 1; ORGANISM_SCIENTIFIC: ARABIDOPSIS THALIANA; ORGANISM_TAXID: 3702	01-JUL-21	12-OCT-21	n/a	33732.8	0.723	4.05	0.041	1.56	0.0022	5.29	0.0074	41.1	0.66	73	29.64	8.26	5.43	58.4	0	71.89	1.37996
Q9SCT6-F1	AF-Q9SCT6-F1-model_v1	ALPHAFOLD V2.0 PREDICTION FOR WEB FAMILY PROTEIN AT3G51720 (Q9SCT6)	MOL_ID: 1; ORGANISM_SCIENTIFIC: ARABIDOPSIS THALIANA; ORGANISM_TAXID: 3702	01-JUL-21	12-OCT-21	n/a	45973.9	0.735	3.66	0.037	1.84	0.0024	5.85	0.0076	37.8	0.6	80.7	28.76	11.08	7.47	61.1	0	74.47	1.37949
A0A1D6IXV7-F1	AF-A0A1D6IXV7-F1-model_v1	ALPHAFOLD V2.0 PREDICTION FOR UNCHARACTERIZED PROTEIN (A0A1D6IXV7)	MOL_ID: 1; ORGANISM_SCIENTIFIC: ZEA MAYS; ORGANISM_TAXID: 4577	01-JUL-21	12-OCT-21	n/a	5055.9	0.75	10.1	0.1	0.528	0.00069	2.11	0.0028	17.1	0.27	29.1	10.49	3.45	1.89	34.8	0	56.12	1.37915
Q8IZU0-F1	AF-Q8IZU0-F1-model_v1	ALPHAFOLD V2.0 PREDICTION FOR PROTEIN FAM9B (Q8IZU0)	MOL_ID: 1; ORGANISM_SCIENTIFIC: HOMO SAPIENS; ORGANISM_TAXID: 9606	01-JUL-21	12-OCT-21	n/a	22433.3	0.721	5.14	0.052	1.33	0.0017	4.17	0.0055	28.2	0.45	57.5	20.61	7.99	5.2	68.7	0	79.23	1.3789
D4A7I7-F1	AF-D4A7I7-F1-model_v1	ALPHAFOLD V2.0 PREDICTION FOR COILED-COIL DOMAIN-CONTAINING 30 (D4A7I7)	MOL_ID: 1; ORGANISM_SCIENTIFIC: RATTUS NORVEGICUS; ORGANISM_TAXID: 10116	01-JUL-21	12-OCT-21	n/a	77906.9	0.734	3.02	0.03	2.58	0.0036	7.1	0.0099	44.6	0.71	97.9	40.18	9.84	7.46	86.3	0	81.28	1.37887
M9NDU9-F1	AF-M9NDU9-F1-model_v1	ALPHAFOLD V2.0 PREDICTION FOR UNCHARACTERIZED PROTEIN (M9NDU9)	MOL_ID: 1; ORGANISM_SCIENTIFIC: DROSOPHILA MELANOGASTER; ORGANISM_TAXID: 7227	01-JUL-21	12-OCT-21	n/a	8204.8	0.742	9.43	0.095	0.823	0.0011	2.27	0.003	13.1	0.21	31.3	11.62	2.2	2.17	91.3	0	76.71	1.37885
P40140-F1	AF-P40140-F1-model_v1	ALPHAFOLD V2.0 PREDICTION FOR PROTEIN NEW-GLUE 3 (P40140)	MOL_ID: 1; ORGANISM_SCIENTIFIC: DROSOPHILA MELANOGASTER; ORGANISM_TAXID: 7227	01-JUL-21	12-OCT-21	1-23	13559.9	0.695	5.96	0.06	1.02	0.0013	3.59	0.0046	28.9	0.46	49.5	15.74	6.14	4.39	18.9	0	63.1	1.37883
F1M3A5-F1	AF-F1M3A5-F1-model_v1	ALPHAFOLD V2.0 PREDICTION FOR SIMILAR TO SPERMATOGENESIS-ASSOCIATED GLUTAMATE (E)-RICH PROTEIN 4D (F1M3A5)	MOL_ID: 1; ORGANISM_SCIENTIFIC: RATTUS NORVEGICUS; ORGANISM_TAXID: 10116	01-JUL-21	12-OCT-21	n/a	23274.1	0.729	5.41	0.055	1.41	0.0019	3.96	0.0052	23.9	0.38	54.6	20.34	5.25	3.39	67.9	0	76.25	1.37879
A0A1D8PLM0-F1	AF-A0A1D8PLM0-F1-model_v1	ALPHAFOLD V2.0 PREDICTION FOR AUTOPHAGY-RELATED PROTEIN 6 (A0A1D8PLM0)	MOL_ID: 1; ORGANISM_SCIENTIFIC: CANDIDA ALBICANS (STRAIN SC5314 / ATCC MYA-2876); ORGANISM_TAXID: 237561	01-JUL-21	12-OCT-21	n/a	60201.8	0.735	4	0.04	2.63	0.0032	5.36	0.0065	20.4	0.32	73.9	21.57	11.65	7.43	53.3	3.3	72.59	1.37873
Q84ZT2-F1	AF-Q84ZT2-F1-model_v1	ALPHAFOLD V2.0 PREDICTION FOR OS07G0583100 PROTEIN (Q84ZT2)	MOL_ID: 1; ORGANISM_SCIENTIFIC: ORYZA SATIVA SUBSP. JAPONICA; ORGANISM_TAXID: 39947	01-JUL-21	12-OCT-21	n/a	9766.2	0.719	7.05	0.071	0.798	0.001	3.04	0.0038	25.9	0.41	41.9	13.78	7.46	2.96	48.4	0	55.83	1.37829
A0A0N7KTF0-F1	AF-A0A0N7KTF0-F1-model_v1	ALPHAFOLD V2.0 PREDICTION FOR OS11G0708600 PROTEIN (A0A0N7KTF0)	MOL_ID: 1; ORGANISM_SCIENTIFIC: ORYZA SATIVA SUBSP. JAPONICA; ORGANISM_TAXID: 39947	01-JUL-21	12-OCT-21	n/a	11290.9	0.721	8.08	0.081	1.05	0.0013	2.65	0.0034	14.5	0.23	36.5	12.27	3.69	3.56	68	0	86.35	1.37736
Q13410-F1	AF-Q13410-F1-model_v1	ALPHAFOLD V2.0 PREDICTION FOR BUTYROPHILIN SUBFAMILY 1 MEMBER A1 (Q13410)	MOL_ID: 1; ORGANISM_SCIENTIFIC: HOMO SAPIENS; ORGANISM_TAXID: 9606	01-JUL-21	12-OCT-21	1-26	56142	0.735	4.59	0.046	2.81	0.0035	4.67	0.0058	14.7	0.23	64.3	19.61	10.83	4.74	12.8	27.4	85.89	1.37687
Q5XIX8-F1	AF-Q5XIX8-F1-model_v1	ALPHAFOLD V2.0 PREDICTION FOR BLOC-1-RELATED COMPLEX SUBUNIT 5 (Q5XIX8)	MOL_ID: 1; ORGANISM_SCIENTIFIC: DANIO RERIO; ORGANISM_TAXID: 7955	01-JUL-21	12-OCT-21	n/a	23545.3	0.739	5.34	0.054	1.35	0.0017	4.01	0.005	22.3	0.35	55.2	18	7.3	6.64	58.7	0	77.94	1.37656
A0A1D6IU76-F1	AF-A0A1D6IU76-F1-model_v1	ALPHAFOLD V2.0 PREDICTION FOR UNCHARACTERIZED PROTEIN (A0A1D6IU76)	MOL_ID: 1; ORGANISM_SCIENTIFIC: ZEA MAYS; ORGANISM_TAXID: 4577	01-JUL-21	12-OCT-21	n/a	5881.8	0.745	10.1	0.1	0.622	0.00082	2.13	0.0028	15.3	0.24	29.3	11.05	2.84	2.2	68.4	0	71.24	1.37559
A0A0R0JMZ1-F1	AF-A0A0R0JMZ1-F1-model_v1	ALPHAFOLD V2.0 PREDICTION FOR UNCHARACTERIZED PROTEIN (A0A0R0JMZ1)	MOL_ID: 1; ORGANISM_SCIENTIFIC: GLYCINE MAX; ORGANISM_TAXID: 3847	01-JUL-21	12-OCT-21	n/a	15313.9	0.732	7.31	0.074	1.24	0.0016	2.93	0.0038	14.9	0.24	40.3	14.8	4.29	3.13	86.7	0	93.44	1.37543
Q8SAX9-F1	AF-Q8SAX9-F1-model_v1	ALPHAFOLD V2.0 PREDICTION FOR OS03G0827900 PROTEIN (Q8SAX9)	MOL_ID: 1; ORGANISM_SCIENTIFIC: ORYZA SATIVA SUBSP. JAPONICA; ORGANISM_TAXID: 39947	01-JUL-21	12-OCT-21	n/a	14446	0.731	6.43	0.065	1.03	0.0014	3.33	0.0044	23.6	0.37	45.8	16.91	5.2	3.27	69.3	0	69.85	1.37538
A0A0B4LGW0-F1	AF-A0A0B4LGW0-F1-model_v1	ALPHAFOLD V2.0 PREDICTION FOR UNCHARACTERIZED PROTEIN (A0A0B4LGW0)	MOL_ID: 1; ORGANISM_SCIENTIFIC: DROSOPHILA MELANOGASTER; ORGANISM_TAXID: 7227	01-JUL-21	12-OCT-21	n/a	6518.1	0.722	9.94	0.1	0.742	0.00095	2.16	0.0028	13.5	0.21	29.7	10.53	3.1	2.04	50.9	0	63.55	1.375
Q9LMH6-F1	AF-Q9LMH6-F1-model_v1	ALPHAFOLD V2.0 PREDICTION FOR FACTOR OF DNA METHYLATION 4 (Q9LMH6)	MOL_ID: 1; ORGANISM_SCIENTIFIC: ARABIDOPSIS THALIANA; ORGANISM_TAXID: 3702	01-JUL-21	12-OCT-21	n/a	85885.6	0.727	3.27	0.033	3.17	0.004	6.54	0.0083	26.8	0.42	89.9	31.1	9.68	9.36	52.5	6.5	77.21	1.37462
Q4DNW1-F1	AF-Q4DNW1-F1-model_v1	ALPHAFOLD V2.0 PREDICTION FOR UNCHARACTERIZED PROTEIN (Q4DNW1)	MOL_ID: 1; ORGANISM_SCIENTIFIC: TRYPANOSOMA CRUZI (STRAIN CL BRENER); ORGANISM_TAXID: 353153	01-JUL-21	12-OCT-21	n/a	26402.7	0.73	5.38	0.054	1.58	0.0022	3.98	0.0055	22.4	0.36	54.7	21.57	4.67	3.86	85.6	0	79.38	1.37437
Q9H0A6-F1	AF-Q9H0A6-F1-model_v1	ALPHAFOLD V2.0 PREDICTION FOR RING FINGER PROTEIN 32 (Q9H0A6)	MOL_ID: 1; ORGANISM_SCIENTIFIC: HOMO SAPIENS; ORGANISM_TAXID: 9606	01-JUL-21	12-OCT-21	n/a	41543.8	0.74	4.69	0.047	2.09	0.0027	4.57	0.006	20.1	0.32	62.8	22.42	6.57	6.45	41	4.4	78.18	1.37418
A0A2R8Q525-F1	AF-A0A2R8Q525-F1-model_v1	ALPHAFOLD V2.0 PREDICTION FOR FINTRIM FAMILY, MEMBER 91 (A0A2R8Q525)	MOL_ID: 1; ORGANISM_SCIENTIFIC: DANIO RERIO; ORGANISM_TAXID: 7955	01-JUL-21	12-OCT-21	n/a	38181.1	0.737	5.04	0.051	2.09	0.0027	4.25	0.0054	17.2	0.27	58.4	19.78	7.52	3.82	55.9	4.9	85.28	1.37412
Q14517-F1	AF-Q14517-F1-model_v1	ALPHAFOLD V2.0 PREDICTION FOR PROTOCADHERIN FAT 1 (Q14517)	MOL_ID: 1; ORGANISM_SCIENTIFIC: HOMO SAPIENS; ORGANISM_TAXID: 9606	01-JUL-21	12-OCT-21	1-21	153221	0.735	3.02	0.03	5.05	0.0066	7.1	0.0092	21.1	0.33	97.5	34.24	13.81	7.76	3.6	31.9	83.57	1.37324
Q7X8C5-F1	AF-Q7X8C5-F1-model_v1	ALPHAFOLD V2.0 PREDICTION FOR WALL-ASSOCIATED RECEPTOR KINASE-LIKE 2 (Q7X8C5)	MOL_ID: 1; ORGANISM_SCIENTIFIC: ARABIDOPSIS THALIANA; ORGANISM_TAXID: 3702	01-JUL-21	12-OCT-21	1-27	80402.7	0.728	4.3	0.043	3.88	0.0047	4.99	0.006	12.5	0.2	68.5	20.72	7.84	7.18	24.7	14.9	78.35	1.37275
Q8I4Q2-F1	AF-Q8I4Q2-F1-model_v1	ALPHAFOLD V2.0 PREDICTION FOR UNCHARACTERIZED PROTEIN (Q8I4Q2)	MOL_ID: 1; ORGANISM_SCIENTIFIC: PLASMODIUM FALCIPARUM (ISOLATE 3D7); ORGANISM_TAXID: 36329	01-JUL-21	12-OCT-21	n/a	24950.2	0.763	5.86	0.059	1.43	0.0019	3.65	0.0049	18.2	0.29	50.1	19.2	4.84	3.76	79.9	0	71.68	1.3726
A0A0R4IAT9-F1	AF-A0A0R4IAT9-F1-model_v1	ALPHAFOLD V2.0 PREDICTION FOR STROMAL INTERACTION MOLECULE 1B (A0A0R4IAT9)	MOL_ID: 1; ORGANISM_SCIENTIFIC: DANIO RERIO; ORGANISM_TAXID: 7955	01-JUL-21	12-OCT-21	1-24	72698.6	0.73	3.39	0.034	2.75	0.0034	6.31	0.0078	26.8	0.42	86.6	27.03	10.46	7.97	49.8	0.6	67.41	1.37242
O94721-F1	AF-O94721-F1-model_v1	ALPHAFOLD V2.0 PREDICTION FOR RWD DOMAIN-CONTAINING PROTEIN C1393.09C (O94721)	MOL_ID: 1; ORGANISM_SCIENTIFIC: SCHIZOSACCHAROMYCES POMBE (STRAIN 972 / ATCC 24843); ORGANISM_TAXID: 284812	01-JUL-21	12-OCT-21	n/a	24670.5	0.728	6.27	0.063	1.73	0.0022	3.42	0.0044	14.2	0.22	46.9	15.91	4.84	3.75	55.6	8.9	86.72	1.37135
Q86IJ6-F1	AF-Q86IJ6-F1-model_v1	ALPHAFOLD V2.0 PREDICTION FOR UNCHARACTERIZED PROTEIN DDB_G0272720 (Q86IJ6)	MOL_ID: 1; ORGANISM_SCIENTIFIC: DICTYOSTELIUM DISCOIDEUM; ORGANISM_TAXID: 44689	01-JUL-21	12-OCT-21	n/a	9441.6	0.717	8.12	0.082	0.894	0.0011	2.64	0.0034	17.4	0.27	36.2	12.67	4.02	2.91	0	14.5	55.1	1.37121
Q54XN3-F1	AF-Q54XN3-F1-model_v1	ALPHAFOLD V2.0 PREDICTION FOR UNCHARACTERIZED PROTEIN (Q54XN3)	MOL_ID: 1; ORGANISM_SCIENTIFIC: DICTYOSTELIUM DISCOIDEUM; ORGANISM_TAXID: 44689	01-JUL-21	12-OCT-21	n/a	6087.4	0.754	9.94	0.1	0.614	0.00079	2.16	0.0028	14.7	0.23	29.6	10.36	3.62	2.14	50	0	78.79	1.37037
Q4DP55-F1	AF-Q4DP55-F1-model_v1	ALPHAFOLD V2.0 PREDICTION FOR UNCHARACTERIZED PROTEIN (Q4DP55)	MOL_ID: 1; ORGANISM_SCIENTIFIC: TRYPANOSOMA CRUZI (STRAIN CL BRENER); ORGANISM_TAXID: 353153	01-JUL-21	12-OCT-21	n/a	68838	0.725	3.62	0.036	2.82	0.0037	5.92	0.0077	27.4	0.43	81.1	28.41	10.28	7.95	37.4	8.1	60.04	1.36993
A0A0R4IG08-F1	AF-A0A0R4IG08-F1-model_v1	ALPHAFOLD V2.0 PREDICTION FOR INTERFERON-INDUCED PROTEIN 35 (A0A0R4IG08)	MOL_ID: 1; ORGANISM_SCIENTIFIC: DANIO RERIO; ORGANISM_TAXID: 7955	01-JUL-21	12-OCT-21	n/a	43516.6	0.735	4.66	0.047	2.21	0.0029	4.6	0.0061	20.3	0.32	63	22.68	6.9	5.84	39.2	24.5	83.53	1.36957
A0A1D6EXG2-F1	AF-A0A1D6EXG2-F1-model_v1	ALPHAFOLD V2.0 PREDICTION FOR UNCHARACTERIZED PROTEIN (A0A1D6EXG2)	MOL_ID: 1; ORGANISM_SCIENTIFIC: ZEA MAYS; ORGANISM_TAXID: 4577	01-JUL-21	12-OCT-21	1-21	46814.2	0.732	5.5	0.055	2.84	0.0034	3.9	0.0047	10.3	0.16	53.4	16.02	5.92	4.61	36.2	18.7	84.26	1.36923
Q6ZAA8-F1	AF-Q6ZAA8-F1-model_v1	ALPHAFOLD V2.0 PREDICTION FOR OS08G0446850 PROTEIN (Q6ZAA8)	MOL_ID: 1; ORGANISM_SCIENTIFIC: ORYZA SATIVA SUBSP. JAPONICA; ORGANISM_TAXID: 39947	01-JUL-21	12-OCT-21	n/a	8717.8	0.734	8.25	0.083	0.789	0.001	2.6	0.0034	18.4	0.29	35.6	13	4.46	2.32	63.2	0	62.22	1.36923
O35115-F1	AF-O35115-F1-model_v1	ALPHAFOLD V2.0 PREDICTION FOR FOUR AND A HALF LIM DOMAINS PROTEIN 2 (O35115)	MOL_ID: 1; ORGANISM_SCIENTIFIC: RATTUS NORVEGICUS; ORGANISM_TAXID: 10116	01-JUL-21	12-OCT-21	n/a	32093.4	0.719	5.85	0.059	2.17	0.0028	3.66	0.0048	13.7	0.22	50.1	18.59	4.12	3.23	11.5	18	92.21	1.36885
Q7ZW63-F1	AF-Q7ZW63-F1-model_v1	ALPHAFOLD V2.0 PREDICTION FOR KINETOCHORE PROTEIN NUF2 (Q7ZW63)	MOL_ID: 1; ORGANISM_SCIENTIFIC: DANIO RERIO; ORGANISM_TAXID: 7955	01-JUL-21	12-OCT-21	n/a	53652.1	0.74	3.89	0.039	2.24	0.0032	5.51	0.0078	30.3	0.49	75.4	31.11	6.98	5.97	84.3	0	89.22	1.36842
O15525-F1	AF-O15525-F1-model_v1	ALPHAFOLD V2.0 PREDICTION FOR TRANSCRIPTION FACTOR MAFG (O15525)	MOL_ID: 1; ORGANISM_SCIENTIFIC: HOMO SAPIENS; ORGANISM_TAXID: 9606	01-JUL-21	12-OCT-21	n/a	17864.7	0.741	5.94	0.06	1.13	0.0015	3.61	0.0048	24.7	0.39	49.4	18.04	6.83	3.94	54.7	0	79.87	1.36842
Q9BXJ2-F1	AF-Q9BXJ2-F1-model_v1	ALPHAFOLD V2.0 PREDICTION FOR COMPLEMENT C1Q TUMOR NECROSIS FACTOR-RELATED PROTEIN 7 (Q9BXJ2)	MOL_ID: 1; ORGANISM_SCIENTIFIC: HOMO SAPIENS; ORGANISM_TAXID: 9606	01-JUL-21	12-OCT-21	1-16	28975.5	0.729	5.22	0.053	1.69	0.0022	4.1	0.0054	22.4	0.35	56.1	20.27	8.31	4.62	4	21.7	76.83	1.36829
Q3V125-F1	AF-Q3V125-F1-model_v1	ALPHAFOLD V2.0 PREDICTION FOR COILED-COIL DOMAIN-CONTAINING PROTEIN 110 (Q3V125)	MOL_ID: 1; ORGANISM_SCIENTIFIC: MUS MUSCULUS; ORGANISM_TAXID: 10090	01-JUL-21	12-OCT-21	n/a	96368.3	0.737	2.42	0.024	2.53	0.0035	8.85	0.012	66	1.06	121	48.63	12.3	11.75	55.6	0.5	65.63	1.36723
O76388-F1	AF-O76388-F1-model_v1	ALPHAFOLD V2.0 PREDICTION FOR UNCHARACTERIZED PROTEIN (O76388)	MOL_ID: 1; ORGANISM_SCIENTIFIC: CAENORHABDITIS ELEGANS; ORGANISM_TAXID: 6239	01-JUL-21	12-OCT-21	n/a	23712.3	0.734	5.14	0.052	1.34	0.0017	4.17	0.0053	25.7	0.41	57	20.19	8.36	4.62	62.3	0	77	1.36691
A0A0P0V7M7-F1	AF-A0A0P0V7M7-F1-model_v1	ALPHAFOLD V2.0 PREDICTION FOR OS01G0725000 PROTEIN (A0A0P0V7M7)	MOL_ID: 1; ORGANISM_SCIENTIFIC: ORYZA SATIVA SUBSP. JAPONICA; ORGANISM_TAXID: 39947	01-JUL-21	12-OCT-21	n/a	7080.2	0.714	7.71	0.078	0.644	0.0008	2.78	0.0034	25.8	0.4	38	11.19	5.15	5.36	0	0	59.65	1.36691
Q9H1M0-F1	AF-Q9H1M0-F1-model_v1	ALPHAFOLD V2.0 PREDICTION FOR NUCLEOPORIN-62 C-TERMINAL-LIKE PROTEIN (Q9H1M0)	MOL_ID: 1; ORGANISM_SCIENTIFIC: HOMO SAPIENS; ORGANISM_TAXID: 9606	01-JUL-21	12-OCT-21	n/a	20824.2	0.73	5.82	0.059	1.35	0.0017	3.68	0.0047	20.4	0.32	50.3	17.41	7.11	3.79	59	0	73.72	1.36685
Q8R4C2-F1	AF-Q8R4C2-F1-model_v1	ALPHAFOLD V2.0 PREDICTION FOR RUN AND FYVE DOMAIN-CONTAINING PROTEIN 2 (Q8R4C2)	MOL_ID: 1; ORGANISM_SCIENTIFIC: MUS MUSCULUS; ORGANISM_TAXID: 10090	01-JUL-21	12-OCT-21	n/a	70091.2	0.738	3.46	0.035	2.62	0.0034	6.19	0.0081	29	0.46	84.6	28.84	11.48	6.31	74.4	1.6	82.4	1.36672
A1L190-F1	AF-A1L190-F1-model_v1	ALPHAFOLD V2.0 PREDICTION FOR SYNAPTONEMAL COMPLEX CENTRAL ELEMENT PROTEIN 3 (A1L190)	MOL_ID: 1; ORGANISM_SCIENTIFIC: HOMO SAPIENS; ORGANISM_TAXID: 9606	01-JUL-21	12-OCT-21	n/a	10593.7	0.727	8.19	0.083	0.977	0.0013	2.62	0.0034	14.8	0.23	35.8	12.39	4.42	2.51	89.7	0	92.25	1.36641
A0A0P0X1G1-F1	AF-A0A0P0X1G1-F1-model_v1	ALPHAFOLD V2.0 PREDICTION FOR OS07G0107366 PROTEIN (A0A0P0X1G1)	MOL_ID: 1; ORGANISM_SCIENTIFIC: ORYZA SATIVA SUBSP. JAPONICA; ORGANISM_TAXID: 39947	01-JUL-21	12-OCT-21	n/a	9570.4	0.724	6.82	0.069	0.742	0.00093	3.14	0.004	27.8	0.44	42.9	14.7	5.85	3.36	0	0	67.78	1.36624
Q14525-F1	AF-Q14525-F1-model_v1	ALPHAFOLD V2.0 PREDICTION FOR KERATIN, TYPE I CUTICULAR HA3-II (Q14525)	MOL_ID: 1; ORGANISM_SCIENTIFIC: HOMO SAPIENS; ORGANISM_TAXID: 9606	01-JUL-21	12-OCT-21	n/a	46201.5	0.723	4.22	0.043	2.22	0.0029	5.08	0.0066	24.6	0.39	69.4	24.89	7.93	3.84	72.5	0	79.28	1.36614
Q8NF67-F1	AF-Q8NF67-F1-model_v1	ALPHAFOLD V2.0 PREDICTION FOR PUTATIVE ANKYRIN REPEAT DOMAIN-CONTAINING PROTEIN 20A12 PSEUDOGENE (Q8NF67)	MOL_ID: 1; ORGANISM_SCIENTIFIC: HOMO SAPIENS; ORGANISM_TAXID: 9606	01-JUL-21	12-OCT-21	n/a	31161.4	0.736	5.13	0.052	1.74	0.0023	4.18	0.0055	21.3	0.34	57.1	20.66	5.6	3.38	92.4	0	86.21	1.36603
K7KN84-F1	AF-K7KN84-F1-model_v1	ALPHAFOLD V2.0 PREDICTION FOR UNCHARACTERIZED PROTEIN (K7KN84)	MOL_ID: 1; ORGANISM_SCIENTIFIC: GLYCINE MAX; ORGANISM_TAXID: 3847	01-JUL-21	12-OCT-21	n/a	8288.2	0.751	7.76	0.078	0.661	0.00084	2.76	0.0035	21.9	0.35	37.7	12.05	6.03	3.14	25.7	0	62.63	1.36594
A0A0R4IK06-F1	AF-A0A0R4IK06-F1-model_v1	ALPHAFOLD V2.0 PREDICTION FOR ANKYRIN REPEAT AND FYVE DOMAIN-CONTAINING 1 (A0A0R4IK06)	MOL_ID: 1; ORGANISM_SCIENTIFIC: DANIO RERIO; ORGANISM_TAXID: 7955	01-JUL-21	12-OCT-21	n/a	127652	0.736	3.53	0.036	4.9	0.0062	6.07	0.0077	15	0.24	82.9	27.94	12.87	6.65	43	1.5	87.54	1.36573
P52926-F1	AF-P52926-F1-model_v1	ALPHAFOLD V2.0 PREDICTION FOR HIGH MOBILITY GROUP PROTEIN HMGI-C (P52926)	MOL_ID: 1; ORGANISM_SCIENTIFIC: HOMO SAPIENS; ORGANISM_TAXID: 9606	01-JUL-21	12-OCT-21	n/a	11846	0.71	6.07	0.061	0.859	0.0011	3.53	0.0045	32.3	0.51	48.2	15.53	7.45	3.86	1.9	0	64.56	1.36544
Q960Y8-F1	AF-Q960Y8-F1-model_v1	ALPHAFOLD V2.0 PREDICTION FOR ALUMINUM TUBES, ISOFORM G (Q960Y8)	MOL_ID: 1; ORGANISM_SCIENTIFIC: DROSOPHILA MELANOGASTER; ORGANISM_TAXID: 7227	01-JUL-21	12-OCT-21	n/a	98611.6	0.724	2.5	0.025	2.81	0.0039	8.57	0.012	58.8	0.94	117	48.38	12.13	10.85	59.3	0	69.57	1.36523
A0A0P0XDN7-F1	AF-A0A0P0XDN7-F1-model_v1	ALPHAFOLD V2.0 PREDICTION FOR OS08G0240600 PROTEIN (A0A0P0XDN7)	MOL_ID: 1; ORGANISM_SCIENTIFIC: ORYZA SATIVA SUBSP. JAPONICA; ORGANISM_TAXID: 39947	01-JUL-21	12-OCT-21	n/a	34510.9	0.737	4.39	0.044	1.64	0.0021	4.88	0.0062	28.4	0.45	66.6	21.54	11.9	8.13	72.9	0	79.88	1.36475
Q9BTK2-F1	AF-Q9BTK2-F1-model_v1	ALPHAFOLD V2.0 PREDICTION FOR PUTATIVE UNCHARACTERIZED PROTEIN LOC642776 (Q9BTK2)	MOL_ID: 1; ORGANISM_SCIENTIFIC: HOMO SAPIENS; ORGANISM_TAXID: 9606	01-JUL-21	12-OCT-21	n/a	4920.4	0.722	9.89	0.1	0.557	0.00075	2.17	0.0029	18.8	0.3	29.6	11.13	3.59	2.14	13.6	0	61.51	1.36406
P35329-F1	AF-P35329-F1-model_v1	ALPHAFOLD V2.0 PREDICTION FOR B-CELL RECEPTOR CD22 (P35329)	MOL_ID: 1; ORGANISM_SCIENTIFIC: MUS MUSCULUS; ORGANISM_TAXID: 10090	01-JUL-21	12-OCT-21	1-21	94162.1	0.729	3.39	0.034	3.57	0.0047	6.32	0.0082	23.8	0.38	86.2	30.85	9.91	6.6	6.1	31.7	80.24	1.36392
Q9SGP9-F1	AF-Q9SGP9-F1-model_v1	ALPHAFOLD V2.0 PREDICTION FOR AT1G28510/F3M18_5 (Q9SGP9)	MOL_ID: 1; ORGANISM_SCIENTIFIC: ARABIDOPSIS THALIANA; ORGANISM_TAXID: 3702	01-JUL-21	12-OCT-21	n/a	19189.2	0.746	6.13	0.062	1.23	0.0017	3.49	0.0047	21	0.33	47.6	18.04	4.87	3.82	80.6	0	85.12	1.3639
A0A0P0X9W8-F1	AF-A0A0P0X9W8-F1-model_v1	ALPHAFOLD V2.0 PREDICTION FOR OS07G0655000 PROTEIN (A0A0P0X9W8)	MOL_ID: 1; ORGANISM_SCIENTIFIC: ORYZA SATIVA SUBSP. JAPONICA; ORGANISM_TAXID: 39947	01-JUL-21	12-OCT-21	n/a	12017.1	0.738	7.21	0.073	0.936	0.0012	2.97	0.0039	19.4	0.31	40.5	14.13	5.58	3.16	50.9	0	64.37	1.36364
Q86TU6-F1	AF-Q86TU6-F1-model_v1	ALPHAFOLD V2.0 PREDICTION FOR PUTATIVE UNCHARACTERIZED PROTEIN ENCODED BY LINC00523 (Q86TU6)	MOL_ID: 1; ORGANISM_SCIENTIFIC: HOMO SAPIENS; ORGANISM_TAXID: 9606	01-JUL-21	12-OCT-21	n/a	12097	0.734	7.15	0.072	0.948	0.0013	3	0.004	20.2	0.32	40.9	14.93	4.95	3.42	72.1	0	58.03	1.36333
C6T4W2-F1	AF-C6T4W2-F1-model_v1	ALPHAFOLD V2.0 PREDICTION FOR UNCHARACTERIZED PROTEIN (C6T4W2)	MOL_ID: 1; ORGANISM_SCIENTIFIC: GLYCINE MAX; ORGANISM_TAXID: 3847	01-JUL-21	12-OCT-21	1-19	10451.9	0.737	8.29	0.084	0.939	0.0012	2.59	0.0033	14.3	0.22	35.3	11.98	4.1	2.3	90.9	0	70.57	1.36293
A0A1D6FJB8-F1	AF-A0A1D6FJB8-F1-model_v1	ALPHAFOLD V2.0 PREDICTION FOR RX_N DOMAIN-CONTAINING PROTEIN (A0A1D6FJB8)	MOL_ID: 1; ORGANISM_SCIENTIFIC: ZEA MAYS; ORGANISM_TAXID: 4577	01-JUL-21	12-OCT-21	n/a	11256.1	0.734	8.17	0.082	1.01	0.0013	2.62	0.0035	14.1	0.22	35.7	12.99	3.22	2.52	90.2	0	80.44	1.3626
Q5LJN3-F1	AF-Q5LJN3-F1-model_v1	ALPHAFOLD V2.0 PREDICTION FOR OCCLUDIN-RELATED Y (Q5LJN3)	MOL_ID: 1; ORGANISM_SCIENTIFIC: DROSOPHILA MELANOGASTER; ORGANISM_TAXID: 7227	01-JUL-21	12-OCT-21	n/a	106620	0.736	2.54	0.026	2.95	0.0039	8.44	0.011	50.2	0.8	115	43.36	12.34	10.47	84	0	77.17	1.36256
A6NIL9-F1	AF-A6NIL9-F1-model_v1	ALPHAFOLD V2.0 PREDICTION FOR PUTATIVE UNCHARACTERIZED PROTEIN CRYM-AS1 (A6NIL9)	MOL_ID: 1; ORGANISM_SCIENTIFIC: HOMO SAPIENS; ORGANISM_TAXID: 9606	01-JUL-21	12-OCT-21	n/a	12315.4	0.756	7.47	0.075	0.925	0.0012	2.87	0.0036	16.2	0.25	39.1	12.64	5.06	3.35	59.3	0	81.25	1.36237
A0A1D6QHM1-F1	AF-A0A1D6QHM1-F1-model_v1	ALPHAFOLD V2.0 PREDICTION FOR UNCHARACTERIZED PROTEIN (A0A1D6QHM1)	MOL_ID: 1; ORGANISM_SCIENTIFIC: ZEA MAYS; ORGANISM_TAXID: 4577	01-JUL-21	12-OCT-21	n/a	9458.5	0.726	8.44	0.085	0.902	0.0012	2.54	0.0034	15.9	0.25	34.6	13.05	3.49	2.11	85.9	0	81.28	1.3622
Q2FW88-F1	AF-Q2FW88-F1-model_v1	ALPHAFOLD V2.0 PREDICTION FOR UNCHARACTERIZED PROTEIN (Q2FW88)	MOL_ID: 1; ORGANISM_SCIENTIFIC: STAPHYLOCOCCUS AUREUS (STRAIN NCTC 8325 / PS 47); ORGANISM_TAXID: 93061	01-JUL-21	12-OCT-21	n/a	3953	0.723	11.4	0.12	0.516	0.00067	1.88	0.0024	14.8	0.23	25.6	9.3	2.76	2.25	0	0	69.28	1.3617
Q96DS6-F1	AF-Q96DS6-F1-model_v1	ALPHAFOLD V2.0 PREDICTION FOR MEMBRANE-SPANNING 4-DOMAINS SUBFAMILY A MEMBER 6E (Q96DS6)	MOL_ID: 1; ORGANISM_SCIENTIFIC: HOMO SAPIENS; ORGANISM_TAXID: 9606	01-JUL-21	12-OCT-21	n/a	15911.7	0.751	6.51	0.066	1.06	0.0015	3.29	0.0046	22.7	0.36	44.8	18.14	3.7	3.01	61.6	0	64.93	1.3617
A0A1D6EKX2-F1	AF-A0A1D6EKX2-F1-model_v1	ALPHAFOLD V2.0 PREDICTION FOR UNCHARACTERIZED PROTEIN (A0A1D6EKX2)	MOL_ID: 1; ORGANISM_SCIENTIFIC: ZEA MAYS; ORGANISM_TAXID: 4577	01-JUL-21	12-OCT-21	n/a	6654.5	0.74	8.41	0.085	0.6	0.00073	2.55	0.0031	20.3	0.32	34.7	9.93	8.29	2.54	11.9	0	64.92	1.36078
Q9D8U6-F1	AF-Q9D8U6-F1-model_v1	ALPHAFOLD V2.0 PREDICTION FOR MAST CELL-EXPRESSED MEMBRANE PROTEIN 1 (Q9D8U6)	MOL_ID: 1; ORGANISM_SCIENTIFIC: MUS MUSCULUS; ORGANISM_TAXID: 10090	01-JUL-21	12-OCT-21	n/a	20657.6	0.742	5.19	0.052	1.14	0.0015	4.13	0.0054	30.2	0.48	56.2	21.12	8.01	3.57	63.2	0	77.55	1.36077
A0A0P0VVM7-F1	AF-A0A0P0VVM7-F1-model_v1	ALPHAFOLD V2.0 PREDICTION FOR OS03G0247600 PROTEIN (A0A0P0VVM7)	MOL_ID: 1; ORGANISM_SCIENTIFIC: ORYZA SATIVA SUBSP. JAPONICA; ORGANISM_TAXID: 39947	01-JUL-21	12-OCT-21	n/a	7506.7	0.726	8.79	0.089	0.745	0.00098	2.44	0.0032	18.1	0.29	33.2	12.12	3.97	2.49	59.4	0	63.38	1.36066
D3ZJJ3-F1	AF-D3ZJJ3-F1-model_v1	ALPHAFOLD V2.0 PREDICTION FOR SIMILAR TO RIKEN CDNA 2610528J11 (D3ZJJ3)	MOL_ID: 1; ORGANISM_SCIENTIFIC: RATTUS NORVEGICUS; ORGANISM_TAXID: 10116	01-JUL-21	12-OCT-21	n/a	11928.7	0.728	6.43	0.065	0.86	0.0011	3.33	0.0044	28.5	0.45	45.3	16.18	7.18	3.21	29.2	0	64.01	1.36036
A0A0R0L7N2-F1	AF-A0A0R0L7N2-F1-model_v1	ALPHAFOLD V2.0 PREDICTION FOR UNCHARACTERIZED PROTEIN (A0A0R0L7N2)	MOL_ID: 1; ORGANISM_SCIENTIFIC: GLYCINE MAX; ORGANISM_TAXID: 3847	01-JUL-21	12-OCT-21	n/a	6758.5	0.733	8.67	0.087	0.645	0.00085	2.47	0.0032	19.9	0.31	33.6	12.02	4.63	2.29	37.7	0	65.45	1.36032
I1M361-F1	AF-I1M361-F1-model_v1	ALPHAFOLD V2.0 PREDICTION FOR UNCHARACTERIZED PROTEIN (I1M361)	MOL_ID: 1; ORGANISM_SCIENTIFIC: GLYCINE MAX; ORGANISM_TAXID: 3847	01-JUL-21	12-OCT-21	n/a	12235.4	0.721	6.83	0.069	0.961	0.0013	3.14	0.0042	23.3	0.37	42.7	16.54	4.02	3.45	50.9	0	54.37	1.35987
F4HRC1-F1	AF-F4HRC1-F1-model_v1	ALPHAFOLD V2.0 PREDICTION FOR THO COMPLEX SUBUNIT 5A (F4HRC1)	MOL_ID: 1; ORGANISM_SCIENTIFIC: ARABIDOPSIS THALIANA; ORGANISM_TAXID: 3702	01-JUL-21	12-OCT-21	n/a	51821.2	0.74	4.28	0.043	2.38	0.003	5.01	0.0064	20.6	0.32	68.1	22.48	10.06	6.99	57.4	6	77.27	1.35928
A0A1D6M002-F1	AF-A0A1D6M002-F1-model_v1	ALPHAFOLD V2.0 PREDICTION FOR MAR-BINDING FILAMENT-LIKE PROTEIN 1 (A0A1D6M002)	MOL_ID: 1; ORGANISM_SCIENTIFIC: ZEA MAYS; ORGANISM_TAXID: 4577	01-JUL-21	12-OCT-21	n/a	83689.3	0.735	2.6	0.026	2.38	0.0031	8.24	0.011	56.6	0.89	112	40.24	13.95	8.42	70.3	0	72.49	1.35922
B9FTX4-F1	AF-B9FTX4-F1-model_v1	ALPHAFOLD V2.0 PREDICTION FOR OS06G0585900 PROTEIN (B9FTX4)	MOL_ID: 1; ORGANISM_SCIENTIFIC: ORYZA SATIVA SUBSP. JAPONICA; ORGANISM_TAXID: 39947	01-JUL-21	12-OCT-21	n/a	8740.7	0.706	7.86	0.079	0.832	0.0011	2.73	0.0036	20.8	0.33	37.1	13.95	4.13	3.36	52.6	0	55.77	1.35897
M0R4V1-F1	AF-M0R4V1-F1-model_v1	ALPHAFOLD V2.0 PREDICTION FOR PROTOCADHERIN BETA 7 (M0R4V1)	MOL_ID: 1; ORGANISM_SCIENTIFIC: RATTUS NORVEGICUS; ORGANISM_TAXID: 10116	01-JUL-21	12-OCT-21	n/a	90490.7	0.739	3.31	0.033	3.22	0.0041	6.47	0.0082	24.9	0.39	87.9	29.49	12.09	7.09	7.8	27.5	79.36	1.35858
Q9Y328-F1	AF-Q9Y328-F1-model_v1	ALPHAFOLD V2.0 PREDICTION FOR NEURONAL VESICLE TRAFFICKING-ASSOCIATED PROTEIN 2 (Q9Y328)	MOL_ID: 1; ORGANISM_SCIENTIFIC: HOMO SAPIENS; ORGANISM_TAXID: 9606	01-JUL-21	12-OCT-21	n/a	19095.4	0.745	5.19	0.052	1.04	0.0014	4.13	0.0056	33.5	0.53	56.1	21	6.02	4.71	30.6	3.5	59.18	1.35835
Q6MFZ9-F1	AF-Q6MFZ9-F1-model_v1	ALPHAFOLD V2.0 PREDICTION FOR RT1 CLASS I, S2 (Q6MFZ9)	MOL_ID: 1; ORGANISM_SCIENTIFIC: RATTUS NORVEGICUS; ORGANISM_TAXID: 10116	01-JUL-21	12-OCT-21	1-20	17007.7	0.729	6.67	0.067	1.27	0.0017	3.21	0.0044	19.3	0.31	43.6	16.31	4.67	3.87	22.6	26.4	87.47	1.35826
Q60DN7-F1	AF-Q60DN7-F1-model_v1	ALPHAFOLD V2.0 PREDICTION FOR BECLIN-1, PUTATIVE, EXPRESSED (Q60DN7)	MOL_ID: 1; ORGANISM_SCIENTIFIC: ORYZA SATIVA SUBSP. JAPONICA; ORGANISM_TAXID: 39947	01-JUL-21	12-OCT-21	n/a	56257.5	0.733	4.08	0.041	2.53	0.003	5.25	0.0062	19.9	0.31	71.3	21.35	9.54	6.88	43.2	2.8	73.22	1.3581
A0A0N7KNQ8-F1	AF-A0A0N7KNQ8-F1-model_v1	ALPHAFOLD V2.0 PREDICTION FOR OS07G0576600 PROTEIN (A0A0N7KNQ8)	MOL_ID: 1; ORGANISM_SCIENTIFIC: ORYZA SATIVA SUBSP. JAPONICA; ORGANISM_TAXID: 39947	01-JUL-21	12-OCT-21	n/a	8207.8	0.721	9.24	0.093	0.872	0.0011	2.32	0.003	13.6	0.21	31.5	11.55	2.65	2.2	95.8	0	94.81	1.35776
A0A1B0GWG4-F1	AF-A0A1B0GWG4-F1-model_v1	ALPHAFOLD V2.0 PREDICTION FOR SERINE-RICH AND TRANSMEMBRANE DOMAIN-CONTAINING 2 (A0A1B0GWG4)	MOL_ID: 1; ORGANISM_SCIENTIFIC: HOMO SAPIENS; ORGANISM_TAXID: 9606	01-JUL-21	12-OCT-21	n/a	10219.3	0.747	7.43	0.075	0.793	0.0011	2.88	0.0038	21	0.33	39.1	14.04	4.93	2.87	47.2	0	67.17	1.35764
B8JLP1-F1	AF-B8JLP1-F1-model_v1	ALPHAFOLD V2.0 PREDICTION FOR GLYCOPROTEIN IB PLATELET SUBUNIT BETA (B8JLP1)	MOL_ID: 1; ORGANISM_SCIENTIFIC: DANIO RERIO; ORGANISM_TAXID: 7955	01-JUL-21	12-OCT-21	1-19	20755.1	0.735	6.96	0.07	1.58	0.0021	3.08	0.004	13	0.21	41.8	14.91	4.65	3.6	51.9	4.3	91.54	1.35714
A0A0P0W8H8-F1	AF-A0A0P0W8H8-F1-model_v1	ALPHAFOLD V2.0 PREDICTION FOR OS04G0305300 PROTEIN (A0A0P0W8H8)	MOL_ID: 1; ORGANISM_SCIENTIFIC: ORYZA SATIVA SUBSP. JAPONICA; ORGANISM_TAXID: 39947	01-JUL-21	12-OCT-21	n/a	8086.6	0.716	7.89	0.08	0.747	0.00099	2.72	0.0036	22.7	0.36	36.9	13.99	4.72	2.93	42.1	0	49.52	1.35662
Q54LM4-F1	AF-Q54LM4-F1-model_v1	ALPHAFOLD V2.0 PREDICTION FOR UNCHARACTERIZED PROTEIN (Q54LM4)	MOL_ID: 1; ORGANISM_SCIENTIFIC: DICTYOSTELIUM DISCOIDEUM; ORGANISM_TAXID: 44689	01-JUL-21	12-OCT-21	n/a	13978.6	0.745	7.61	0.077	1.12	0.0015	2.81	0.0037	14.7	0.23	38.1	14.29	3.19	2.56	87.6	0	68.51	1.35587
Q57915-F1	AF-Q57915-F1-model_v1	ALPHAFOLD V2.0 PREDICTION FOR UNCHARACTERIZED PROTEIN MJ0492 (Q57915)	MOL_ID: 1; ORGANISM_SCIENTIFIC: METHANOCALDOCOCCUS JANNASCHII (STRAIN ATCC 43067 / DSM 2661 / JAL-1 / JCM 10045 / NBRC 100440); ORGANISM_TAXID: 243232	01-JUL-21	12-OCT-21	n/a	10699.2	0.756	8.02	0.081	0.864	0.0011	2.67	0.0034	15.6	0.25	36.2	12	5.17	2.65	90.4	0	72.33	1.35581
X2J4U0-F1	AF-X2J4U0-F1-model_v1	ALPHAFOLD V2.0 PREDICTION FOR UNCHARACTERIZED PROTEIN (X2J4U0)	MOL_ID: 1; ORGANISM_SCIENTIFIC: DROSOPHILA MELANOGASTER; ORGANISM_TAXID: 7227	01-JUL-21	12-OCT-21	1-23	13742.7	0.74	6.79	0.069	1	0.0013	3.15	0.0042	21.3	0.34	42.7	16	5.59	3	81.2	0	74.2	1.35556
A0A6Q8PHS2-F1	AF-A0A6Q8PHS2-F1-model_v1	ALPHAFOLD V2.0 PREDICTION FOR UNCHARACTERIZED PROTEIN (A0A6Q8PHS2)	MOL_ID: 1; ORGANISM_SCIENTIFIC: HOMO SAPIENS; ORGANISM_TAXID: 9606	01-JUL-21	12-OCT-21	n/a	7478.9	0.715	7.95	0.08	0.698	0.00088	2.7	0.0034	22.9	0.36	36.6	12.15	6	3.5	25.4	0	58.5	1.35556
Q8N4Y2-F1	AF-Q8N4Y2-F1-model_v1	ALPHAFOLD V2.0 PREDICTION FOR EF-HAND CALCIUM-BINDING DOMAIN-CONTAINING PROTEIN 4A (Q8N4Y2)	MOL_ID: 1; ORGANISM_SCIENTIFIC: HOMO SAPIENS; ORGANISM_TAXID: 9606	01-JUL-21	12-OCT-21	n/a	44947.7	0.721	3.97	0.04	2.05	0.0026	5.4	0.0069	30.5	0.48	73.2	25.97	9.77	7.18	66.6	1	77.04	1.35556
A6NGB0-F1	AF-A6NGB0-F1-model_v1	ALPHAFOLD V2.0 PREDICTION FOR TRANSMEMBRANE PROTEIN 191C (A6NGB0)	MOL_ID: 1; ORGANISM_SCIENTIFIC: HOMO SAPIENS; ORGANISM_TAXID: 9606	01-JUL-21	12-OCT-21	n/a	39302	0.737	4.11	0.042	1.75	0.0024	5.21	0.007	33.2	0.53	70.6	27.56	6.98	5.03	74	0	75.26	1.35509
A0A1D6FDU9-F1	AF-A0A1D6FDU9-F1-model_v1	ALPHAFOLD V2.0 PREDICTION FOR UNCHARACTERIZED PROTEIN (A0A1D6FDU9)	MOL_ID: 1; ORGANISM_SCIENTIFIC: ZEA MAYS; ORGANISM_TAXID: 4577	01-JUL-21	12-OCT-21	n/a	10786.1	0.725	8.25	0.083	1.01	0.0013	2.6	0.0033	14.1	0.22	35.2	11.62	4.37	2.91	83.9	0	88.19	1.35385
Q9NXR1-F1	AF-Q9NXR1-F1-model_v1	ALPHAFOLD V2.0 PREDICTION FOR NUCLEAR DISTRIBUTION PROTEIN NUDE HOMOLOG 1 (Q9NXR1)	MOL_ID: 1; ORGANISM_SCIENTIFIC: HOMO SAPIENS; ORGANISM_TAXID: 9606	01-JUL-21	12-OCT-21	n/a	37715.6	0.719	3.99	0.04	1.74	0.0024	5.37	0.0072	36	0.57	72.7	28.24	9.47	5.59	62.3	0	77.35	1.35382
A0A1D6I1N7-F1	AF-A0A1D6I1N7-F1-model_v1	ALPHAFOLD V2.0 PREDICTION FOR UNCHARACTERIZED PROTEIN (A0A1D6I1N7)	MOL_ID: 1; ORGANISM_SCIENTIFIC: ZEA MAYS; ORGANISM_TAXID: 4577	01-JUL-21	12-OCT-21	n/a	13409	0.734	7.73	0.078	1.14	0.0015	2.77	0.0036	14.1	0.22	37.5	13.97	3.4	3.38	78.3	0	78.62	1.35379
A0A0P0XXB8-F1	AF-A0A0P0XXB8-F1-model_v1	ALPHAFOLD V2.0 PREDICTION FOR OS10G0549950 PROTEIN (A0A0P0XXB8)	MOL_ID: 1; ORGANISM_SCIENTIFIC: ORYZA SATIVA SUBSP. JAPONICA; ORGANISM_TAXID: 39947	01-JUL-21	12-OCT-21	1-17	7298.7	0.741	8.71	0.088	0.679	0.00087	2.46	0.0032	17.4	0.27	33.3	11.09	4.61	2.61	37.3	0	70.36	1.35366
Q15053-F1	AF-Q15053-F1-model_v1	ALPHAFOLD V2.0 PREDICTION FOR UNCHARACTERIZED PROTEIN KIAA0040 (Q15053)	MOL_ID: 1; ORGANISM_SCIENTIFIC: HOMO SAPIENS; ORGANISM_TAXID: 9606	01-JUL-21	12-OCT-21	n/a	11445.9	0.76	7.64	0.077	0.866	0.0011	2.8	0.0035	16.6	0.26	37.9	13.22	5.09	3.16	68.4	0	68.88	1.35357
Q9BXJ5-F1	AF-Q9BXJ5-F1-model_v1	ALPHAFOLD V2.0 PREDICTION FOR COMPLEMENT C1Q TUMOR NECROSIS FACTOR-RELATED PROTEIN 2 (Q9BXJ5)	MOL_ID: 1; ORGANISM_SCIENTIFIC: HOMO SAPIENS; ORGANISM_TAXID: 9606	01-JUL-21	12-OCT-21	1-15	28408.7	0.725	5.11	0.052	1.64	0.0023	4.2	0.0058	24.3	0.39	56.8	20.36	8.47	5.69	0.7	21.9	74.17	1.35238
Q9Y5F3-F1	AF-Q9Y5F3-F1-model_v1	ALPHAFOLD V2.0 PREDICTION FOR PROTOCADHERIN BETA-1 (Q9Y5F3)	MOL_ID: 1; ORGANISM_SCIENTIFIC: HOMO SAPIENS; ORGANISM_TAXID: 9606	01-JUL-21	12-OCT-21	1-28	87459.4	0.737	3.48	0.035	3.3	0.0042	6.16	0.0079	22.3	0.35	83.3	29.07	10.68	9.42	7.3	28.6	81.57	1.35227
C8JQQ0-F1	AF-C8JQQ0-F1-model_v1	ALPHAFOLD V2.0 PREDICTION FOR UNCHARACTERIZED PROTEIN (C8JQQ0)	MOL_ID: 1; ORGANISM_SCIENTIFIC: CAENORHABDITIS ELEGANS; ORGANISM_TAXID: 6239	01-JUL-21	12-OCT-21	n/a	9154.3	0.73	8.67	0.088	0.884	0.0012	2.47	0.0033	15.3	0.24	33.4	13.09	2.85	2.3	86.7	0	87.28	1.35223
E9Q9U2-F1	AF-E9Q9U2-F1-model_v1	ALPHAFOLD V2.0 PREDICTION FOR SPERMATOGENESIS-ASSOCIATED GLUTAMATE (E)-RICH PROTEIN 2 (E9Q9U2)	MOL_ID: 1; ORGANISM_SCIENTIFIC: MUS MUSCULUS; ORGANISM_TAXID: 10090	01-JUL-21	12-OCT-21	n/a	31189.4	0.729	4.49	0.045	1.56	0.002	4.77	0.006	29.1	0.46	64.5	22.4	8.06	4.87	55.1	0	68.53	1.3522
Q86UA6-F1	AF-Q86UA6-F1-model_v1	ALPHAFOLD V2.0 PREDICTION FOR RPA-INTERACTING PROTEIN (Q86UA6)	MOL_ID: 1; ORGANISM_SCIENTIFIC: HOMO SAPIENS; ORGANISM_TAXID: 9606	01-JUL-21	12-OCT-21	n/a	24762.3	0.729	5.98	0.06	1.66	0.002	3.58	0.0043	14.9	0.23	48.4	15.08	7.04	5.54	55.5	8.3	81.29	1.35196
C6T4V4-F1	AF-C6T4V4-F1-model_v1	ALPHAFOLD V2.0 PREDICTION FOR UNCHARACTERIZED PROTEIN (C6T4V4)	MOL_ID: 1; ORGANISM_SCIENTIFIC: GLYCINE MAX; ORGANISM_TAXID: 3847	01-JUL-21	12-OCT-21	n/a	9228.2	0.718	6.98	0.07	0.749	0.00098	3.07	0.004	27.8	0.44	41.5	14.8	6.16	3.74	10.8	0	58.83	1.35179
O35608-F1	AF-O35608-F1-model_v1	ALPHAFOLD V2.0 PREDICTION FOR ANGIOPOIETIN-2 (O35608)	MOL_ID: 1; ORGANISM_SCIENTIFIC: MUS MUSCULUS; ORGANISM_TAXID: 10090	01-JUL-21	12-OCT-21	1-18	54475.7	0.726	4.08	0.041	2.51	0.0034	5.26	0.0071	25	0.4	71.1	27.78	6.68	6.46	44.9	10.5	85.72	1.35171
A0A0P0Y958-F1	AF-A0A0P0Y958-F1-model_v1	ALPHAFOLD V2.0 PREDICTION FOR OS12G0278401 PROTEIN (A0A0P0Y958)	MOL_ID: 1; ORGANISM_SCIENTIFIC: ORYZA SATIVA SUBSP. JAPONICA; ORGANISM_TAXID: 39947	01-JUL-21	12-OCT-21	n/a	8525.8	0.76	9.08	0.092	0.766	0.001	2.36	0.0031	14	0.22	31.9	12.52	3.27	2.24	24.3	51.4	67.7	1.35169
Q9LZP8-F1	AF-Q9LZP8-F1-model_v1	ALPHAFOLD V2.0 PREDICTION FOR BZIP TRANSCRIPTION FACTOR 53 (Q9LZP8)	MOL_ID: 1; ORGANISM_SCIENTIFIC: ARABIDOPSIS THALIANA; ORGANISM_TAXID: 3702	01-JUL-21	12-OCT-21	n/a	16805.5	0.723	6.55	0.066	1.26	0.0016	3.27	0.0043	18	0.29	44.2	15	6.13	2.64	67.6	0	85.01	1.35168
K7KLC8-F1	AF-K7KLC8-F1-model_v1	ALPHAFOLD V2.0 PREDICTION FOR UNCHARACTERIZED PROTEIN (K7KLC8)	MOL_ID: 1; ORGANISM_SCIENTIFIC: GLYCINE MAX; ORGANISM_TAXID: 3847	01-JUL-21	12-OCT-21	n/a	8858.9	0.746	8.95	0.09	0.831	0.0011	2.39	0.0031	13.5	0.21	32.3	11.82	3.58	2.24	86.5	0	85.75	1.35146
Q9SUR5-F1	AF-Q9SUR5-F1-model_v1	ALPHAFOLD V2.0 PREDICTION FOR AT4G23610/F9D16_80 (Q9SUR5)	MOL_ID: 1; ORGANISM_SCIENTIFIC: ARABIDOPSIS THALIANA; ORGANISM_TAXID: 3702	01-JUL-21	12-OCT-21	n/a	25797.8	0.744	5.74	0.058	1.56	0.0022	3.73	0.0052	20.8	0.33	50.4	20.97	4.2	3.79	24.2	35.2	79.68	1.35121
Q9BVV8-F1	AF-Q9BVV8-F1-model_v1	ALPHAFOLD V2.0 PREDICTION FOR PROTEIN FAM174C (Q9BVV8)	MOL_ID: 1; ORGANISM_SCIENTIFIC: HOMO SAPIENS; ORGANISM_TAXID: 9606	01-JUL-21	12-OCT-21	1-26	11604.2	0.728	6.72	0.068	0.874	0.0011	3.19	0.0042	25	0.39	43.1	15.84	4.59	4.17	27.6	0	63.15	1.3511
Q1A5L0-F1	AF-Q1A5L0-F1-model_v1	ALPHAFOLD V2.0 PREDICTION FOR CRUMBS HOMOLOG 3A (Q1A5L0)	MOL_ID: 1; ORGANISM_SCIENTIFIC: DANIO RERIO; ORGANISM_TAXID: 7955	01-JUL-21	12-OCT-21	1-22	9319.1	0.749	8.08	0.081	0.779	0.001	2.65	0.0034	17.8	0.28	35.8	12.87	3.82	3.92	41.9	0	73.82	1.35094
I1K6K8-F1	AF-I1K6K8-F1-model_v1	ALPHAFOLD V2.0 PREDICTION FOR C2 NT-TYPE DOMAIN-CONTAINING PROTEIN (I1K6K8)	MOL_ID: 1; ORGANISM_SCIENTIFIC: GLYCINE MAX; ORGANISM_TAXID: 3847	01-JUL-21	12-OCT-21	n/a	123979	0.728	2.33	0.024	3.24	0.0045	9.18	0.013	56.5	0.9	124	49.41	16.38	10.19	63	5.1	72.24	1.35076
K7L653-F1	AF-K7L653-F1-model_v1	ALPHAFOLD V2.0 PREDICTION FOR UNCHARACTERIZED PROTEIN (K7L653)	MOL_ID: 1; ORGANISM_SCIENTIFIC: GLYCINE MAX; ORGANISM_TAXID: 3847	01-JUL-21	12-OCT-21	1-24	7512.8	0.753	8.54	0.086	0.653	0.0008	2.51	0.0031	17.3	0.27	33.9	9.96	5.29	2.97	35.3	0	67.51	1.3506
Q8N6V9-F1	AF-Q8N6V9-F1-model_v1	ALPHAFOLD V2.0 PREDICTION FOR TESTIS-EXPRESSED PROTEIN 9 (Q8N6V9)	MOL_ID: 1; ORGANISM_SCIENTIFIC: HOMO SAPIENS; ORGANISM_TAXID: 9606	01-JUL-21	12-OCT-21	n/a	44831	0.735	3.75	0.038	1.84	0.0025	5.71	0.0078	36.8	0.59	77.1	30.97	8.43	7.91	65.1	0	77.92	1.35026
A4I4Z2-F1	AF-A4I4Z2-F1-model_v1	ALPHAFOLD V2.0 PREDICTION FOR HYPOTHETICAL_PROTEIN_-_CONSERVED (A4I4Z2)	MOL_ID: 1; ORGANISM_SCIENTIFIC: LEISHMANIA INFANTUM; ORGANISM_TAXID: 5671	01-JUL-21	12-OCT-21	n/a	8483.5	0.743	9.05	0.091	0.813	0.0011	2.37	0.0031	14.3	0.23	32	11.73	2.49	2.14	94.4	0	81.54	1.35021
Q9VUE1-F1	AF-Q9VUE1-F1-model_v1	ALPHAFOLD V2.0 PREDICTION FOR UNCHARACTERIZED PROTEIN (Q9VUE1)	MOL_ID: 1; ORGANISM_SCIENTIFIC: DROSOPHILA MELANOGASTER; ORGANISM_TAXID: 7227	01-JUL-21	12-OCT-21	n/a	11853.1	0.699	6.69	0.067	0.983	0.0012	3.2	0.004	22.9	0.36	43.2	14.36	5.28	3.5	11.9	0	60.89	1.35
Q5TZF0-F1	AF-Q5TZF0-F1-model_v1	ALPHAFOLD V2.0 PREDICTION FOR RAS ASSOCIATION DOMAIN FAMILY MEMBER 8B (Q5TZF0)	MOL_ID: 1; ORGANISM_SCIENTIFIC: DANIO RERIO; ORGANISM_TAXID: 7955	01-JUL-21	12-OCT-21	n/a	48367	0.73	3.8	0.038	2.05	0.0028	5.64	0.0078	33.4	0.53	76.1	30.57	8.33	6.73	52.3	6.7	76.14	1.34929
A0A0P0VEV9-F1	AF-A0A0P0VEV9-F1-model_v1	ALPHAFOLD V2.0 PREDICTION FOR OS02G0147200 PROTEIN (A0A0P0VEV9)	MOL_ID: 1; ORGANISM_SCIENTIFIC: ORYZA SATIVA SUBSP. JAPONICA; ORGANISM_TAXID: 39947	01-JUL-21	12-OCT-21	n/a	8688.8	0.75	9.23	0.093	0.827	0.0011	2.32	0.003	12.4	0.2	31.3	10.76	3.93	2.32	91.1	0	71.59	1.34914
R4GEW2-F1	AF-R4GEW2-F1-model_v1	ALPHAFOLD V2.0 PREDICTION FOR SI:CH211-155O21.4 (R4GEW2)	MOL_ID: 1; ORGANISM_SCIENTIFIC: DANIO RERIO; ORGANISM_TAXID: 7955	01-JUL-21	12-OCT-21	n/a	8838.3	0.708	8.42	0.085	0.895	0.0012	2.55	0.0034	17.4	0.28	34.4	13.35	2.38	2.48	79.7	0	72.27	1.34902
Q5Z6F9-F1	AF-Q5Z6F9-F1-model_v1	ALPHAFOLD V2.0 PREDICTION FOR OS06G0697800 PROTEIN (Q5Z6F9)	MOL_ID: 1; ORGANISM_SCIENTIFIC: ORYZA SATIVA SUBSP. JAPONICA; ORGANISM_TAXID: 39947	01-JUL-21	12-OCT-21	n/a	12146	0.729	6.23	0.063	0.845	0.0011	3.44	0.0046	31.6	0.5	46.4	17.25	6.93	4.43	34.8	0	61.2	1.34884
O14330-F1	AF-O14330-F1-model_v1	ALPHAFOLD V2.0 PREDICTION FOR UNCHARACTERIZED PROTEIN C16E9.15 (O14330)	MOL_ID: 1; ORGANISM_SCIENTIFIC: SCHIZOSACCHAROMYCES POMBE (STRAIN 972 / ATCC 24843); ORGANISM_TAXID: 284812	01-JUL-21	12-OCT-21	n/a	8300.4	0.722	8.46	0.085	0.804	0.0011	2.53	0.0036	19.3	0.31	34.1	14.13	3.47	2.13	73	0	84.07	1.34783
Q9D2R6-F1	AF-Q9D2R6-F1-model_v1	ALPHAFOLD V2.0 PREDICTION FOR CYTOCHROME C OXIDASE ASSEMBLY FACTOR 3 HOMOLOG, MITOCHONDRIAL (Q9D2R6)	MOL_ID: 1; ORGANISM_SCIENTIFIC: MUS MUSCULUS; ORGANISM_TAXID: 10090	01-JUL-21	12-OCT-21	n/a	11992.5	0.732	7.18	0.072	0.951	0.0013	2.99	0.0041	20.5	0.33	40.3	16.01	4.8	3.3	67.3	0	79.35	1.34783
A0A0P0WVD2-F1	AF-A0A0P0WVD2-F1-model_v1	ALPHAFOLD V2.0 PREDICTION FOR OS06G0259401 PROTEIN (A0A0P0WVD2)	MOL_ID: 1; ORGANISM_SCIENTIFIC: ORYZA SATIVA SUBSP. JAPONICA; ORGANISM_TAXID: 39947	01-JUL-21	12-OCT-21	n/a	11751.5	0.722	6.06	0.061	0.816	0.0011	3.54	0.0049	33.5	0.54	47.7	18.58	6.6	4.13	5.4	0	54.29	1.34746
A0A143ZXZ7-F1	AF-A0A143ZXZ7-F1-model_v1	ALPHAFOLD V2.0 PREDICTION FOR UNCHARACTERIZED PROTEIN (A0A143ZXZ7)	MOL_ID: 1; ORGANISM_SCIENTIFIC: PLASMODIUM FALCIPARUM (ISOLATE 3D7); ORGANISM_TAXID: 36329	01-JUL-21	12-OCT-21	1-20	13558.8	0.747	7.22	0.073	1.02	0.0014	2.97	0.0039	17.9	0.28	40	15.13	3.87	2.73	69.6	0	64.09	1.3468
Q6GQL7-F1	AF-Q6GQL7-F1-model_v1	ALPHAFOLD V2.0 PREDICTION FOR FHLA PROTEIN (Q6GQL7)	MOL_ID: 1; ORGANISM_SCIENTIFIC: DANIO RERIO; ORGANISM_TAXID: 7955	01-JUL-21	12-OCT-21	n/a	34238.6	0.72	5.76	0.058	2.28	0.0029	3.72	0.0047	13	0.2	50.1	17.9	5.06	3.55	12.2	17.6	88.21	1.34677
I1KAZ5-F1	AF-I1KAZ5-F1-model_v1	ALPHAFOLD V2.0 PREDICTION FOR UNCHARACTERIZED PROTEIN (I1KAZ5)	MOL_ID: 1; ORGANISM_SCIENTIFIC: GLYCINE MAX; ORGANISM_TAXID: 3847	01-JUL-21	12-OCT-21	n/a	8028.1	0.74	9.53	0.096	0.82	0.0011	2.25	0.003	12.9	0.2	30.3	11.45	2.28	2.27	95.8	0	86.68	1.34667
A0A0G2KAZ0-F1	AF-A0A0G2KAZ0-F1-model_v1	ALPHAFOLD V2.0 PREDICTION FOR SIMILAR TO IMMUNORECEPTOR LY49SI3 (A0A0G2KAZ0)	MOL_ID: 1; ORGANISM_SCIENTIFIC: RATTUS NORVEGICUS; ORGANISM_TAXID: 10116	01-JUL-21	12-OCT-21	n/a	26323.2	0.733	5.23	0.053	1.52	0.0019	4.1	0.0051	22.5	0.35	55.2	18.68	6.8	4.12	39.9	9.9	75.79	1.34634
A0A0R0GYS0-F1	AF-A0A0R0GYS0-F1-model_v1	ALPHAFOLD V2.0 PREDICTION FOR UNCHARACTERIZED PROTEIN (A0A0R0GYS0)	MOL_ID: 1; ORGANISM_SCIENTIFIC: GLYCINE MAX; ORGANISM_TAXID: 3847	01-JUL-21	12-OCT-21	n/a	6744.1	0.746	10.2	0.1	0.719	0.00093	2.11	0.0027	12.2	0.19	28.4	9.99	2.78	2.17	82.5	0	75.14	1.34597
Q9VL63-F1	AF-Q9VL63-F1-model_v1	ALPHAFOLD V2.0 PREDICTION FOR UPF0430 PROTEIN CG31712 (Q9VL63)	MOL_ID: 1; ORGANISM_SCIENTIFIC: DROSOPHILA MELANOGASTER; ORGANISM_TAXID: 7227	01-JUL-21	12-OCT-21	n/a	35550.3	0.715	4	0.04	1.67	0.0022	5.35	0.0071	37.6	0.6	72	27.4	10.56	5.04	59.2	0	72.27	1.34579
Q5AF98-F1	AF-Q5AF98-F1-model_v1	ALPHAFOLD V2.0 PREDICTION FOR ZUOTIN (Q5AF98)	MOL_ID: 1; ORGANISM_SCIENTIFIC: CANDIDA ALBICANS (STRAIN SC5314 / ATCC MYA-2876); ORGANISM_TAXID: 237561	01-JUL-21	12-OCT-21	n/a	48361	0.735	4.41	0.044	2.33	0.0031	4.86	0.0064	20.2	0.32	65.4	22.01	10.94	6.01	62	0	86.3	1.34568
I1JWJ6-F1	AF-I1JWJ6-F1-model_v1	ALPHAFOLD V2.0 PREDICTION FOR UNCHARACTERIZED PROTEIN (I1JWJ6)	MOL_ID: 1; ORGANISM_SCIENTIFIC: GLYCINE MAX; ORGANISM_TAXID: 3847	01-JUL-21	12-OCT-21	n/a	6754.4	0.765	9.74	0.098	0.638	0.00082	2.2	0.0028	13.9	0.22	29.6	10.89	2.87	2.5	40.4	0	68.99	1.34545
Q4D835-F1	AF-Q4D835-F1-model_v1	ALPHAFOLD V2.0 PREDICTION FOR UNCHARACTERIZED PROTEIN (Q4D835)	MOL_ID: 1; ORGANISM_SCIENTIFIC: TRYPANOSOMA CRUZI (STRAIN CL BRENER); ORGANISM_TAXID: 353153	01-JUL-21	12-OCT-21	n/a	17933.5	0.736	6.84	0.069	1.34	0.0017	3.13	0.0039	14.5	0.23	42.1	14.24	4.43	3.38	77.7	0	77.83	1.34505
C6T4Y6-F1	AF-C6T4Y6-F1-model_v1	ALPHAFOLD V2.0 PREDICTION FOR UNCHARACTERIZED PROTEIN (C6T4Y6)	MOL_ID: 1; ORGANISM_SCIENTIFIC: GLYCINE MAX; ORGANISM_TAXID: 3847	01-JUL-21	12-OCT-21	n/a	11186.3	0.729	7.24	0.073	0.904	0.0012	2.96	0.0038	20.7	0.33	39.8	13.26	5.66	3.44	52.5	0	63.62	1.34459
A0A0P0WWT7-F1	AF-A0A0P0WWT7-F1-model_v1	ALPHAFOLD V2.0 PREDICTION FOR OS06G0493900 PROTEIN (A0A0P0WWT7)	MOL_ID: 1; ORGANISM_SCIENTIFIC: ORYZA SATIVA SUBSP. JAPONICA; ORGANISM_TAXID: 39947	01-JUL-21	12-OCT-21	n/a	6622.4	0.723	8.91	0.09	0.673	0.00084	2.41	0.003	18.1	0.29	32.4	11.01	4.18	3.29	16.9	0	65.16	1.3444
Q8LD46-F1	AF-Q8LD46-F1-model_v1	ALPHAFOLD V2.0 PREDICTION FOR 60S RIBOSOMAL PROTEIN L23A-1 (Q8LD46)	MOL_ID: 1; ORGANISM_SCIENTIFIC: ARABIDOPSIS THALIANA; ORGANISM_TAXID: 3702	01-JUL-21	12-OCT-21	n/a	17469.1	0.757	6.42	0.065	1.12	0.0014	3.34	0.0042	18.4	0.29	44.9	14.44	5.57	4.11	27.4	13.7	88.56	1.34431
A0A0R0G9Z5-F1	AF-A0A0R0G9Z5-F1-model_v1	ALPHAFOLD V2.0 PREDICTION FOR 60S RIBOSOMAL PROTEIN L29 (A0A0R0G9Z5)	MOL_ID: 1; ORGANISM_SCIENTIFIC: GLYCINE MAX; ORGANISM_TAXID: 3847	01-JUL-21	12-OCT-21	n/a	7760.1	0.742	8.38	0.084	0.691	0.00087	2.56	0.0032	18.6	0.29	34.4	10.87	5.74	2.7	24.6	0	77.65	1.34375
A0A0P0VAX9-F1	AF-A0A0P0VAX9-F1-model_v1	ALPHAFOLD V2.0 PREDICTION FOR OS01G0872533 PROTEIN (A0A0P0VAX9)	MOL_ID: 1; ORGANISM_SCIENTIFIC: ORYZA SATIVA SUBSP. JAPONICA; ORGANISM_TAXID: 39947	01-JUL-21	12-OCT-21	n/a	11944.2	0.702	6.03	0.061	0.885	0.0012	3.55	0.0047	33.2	0.53	47.7	17.56	6.24	4.46	0	0	56.76	1.34366
Q9EPY0-F1	AF-Q9EPY0-F1-model_v1	ALPHAFOLD V2.0 PREDICTION FOR CASPASE RECRUITMENT DOMAIN-CONTAINING PROTEIN 9 (Q9EPY0)	MOL_ID: 1; ORGANISM_SCIENTIFIC: RATTUS NORVEGICUS; ORGANISM_TAXID: 10116	01-JUL-21	12-OCT-21	n/a	62628.1	0.731	3.83	0.039	2.66	0.0033	5.59	0.007	23.5	0.37	75.1	26.96	8.49	7.53	74.2	0	80.76	1.34347
A6NMB1-F1	AF-A6NMB1-F1-model_v1	ALPHAFOLD V2.0 PREDICTION FOR SIALIC ACID-BINDING IG-LIKE LECTIN 16 (A6NMB1)	MOL_ID: 1; ORGANISM_SCIENTIFIC: HOMO SAPIENS; ORGANISM_TAXID: 9606	01-JUL-21	12-OCT-21	1-16	51403.9	0.731	4.54	0.046	2.59	0.0037	4.72	0.0067	20.6	0.33	63.4	26.99	4.74	4.72	11.4	34.5	84.16	1.34322
Q96J86-F1	AF-Q96J86-F1-model_v1	ALPHAFOLD V2.0 PREDICTION FOR CYSTEINE AND TYROSINE-RICH PROTEIN 1 (Q96J86)	MOL_ID: 1; ORGANISM_SCIENTIFIC: HOMO SAPIENS; ORGANISM_TAXID: 9606	01-JUL-21	12-OCT-21	1-29	13450.2	0.728	6.35	0.064	0.957	0.0012	3.38	0.0044	24.1	0.38	45.4	14.97	6.38	4.81	37.1	0	61.67	1.3432
A0A0P0VWM5-F1	AF-A0A0P0VWM5-F1-model_v1	ALPHAFOLD V2.0 PREDICTION FOR OS03G0311850 PROTEIN (A0A0P0VWM5)	MOL_ID: 1; ORGANISM_SCIENTIFIC: ORYZA SATIVA SUBSP. JAPONICA; ORGANISM_TAXID: 39947	01-JUL-21	12-OCT-21	n/a	8129.2	0.718	8.63	0.087	0.815	0.0011	2.48	0.0033	17	0.27	33.3	12.9	2.53	2.27	71.4	0	66.84	1.34274
Q5RGX0-F1	AF-Q5RGX0-F1-model_v1	ALPHAFOLD V2.0 PREDICTION FOR UNCHARACTERIZED PROTEIN (Q5RGX0)	MOL_ID: 1; ORGANISM_SCIENTIFIC: DANIO RERIO; ORGANISM_TAXID: 7955	01-JUL-21	12-OCT-21	n/a	7538.5	0.742	10.1	0.1	0.807	0.001	2.13	0.0027	11.3	0.18	28.6	10.38	2.53	1.98	92.2	0	96.02	1.34272
C7IYZ1-F1	AF-C7IYZ1-F1-model_v1	ALPHAFOLD V2.0 PREDICTION FOR OS02G0694201 PROTEIN (C7IYZ1)	MOL_ID: 1; ORGANISM_SCIENTIFIC: ORYZA SATIVA SUBSP. JAPONICA; ORGANISM_TAXID: 39947	01-JUL-21	12-OCT-21	n/a	14810.2	0.735	6.67	0.067	1.08	0.0014	3.21	0.0043	20.4	0.32	43.1	14.37	6.32	4.34	27.2	16.8	79.19	1.34268
Q58781-F1	AF-Q58781-F1-model_v1	ALPHAFOLD V2.0 PREDICTION FOR UNCHARACTERIZED PROTEIN MJ1386 (Q58781)	MOL_ID: 1; ORGANISM_SCIENTIFIC: METHANOCALDOCOCCUS JANNASCHII (STRAIN ATCC 43067 / DSM 2661 / JAL-1 / JCM 10045 / NBRC 100440); ORGANISM_TAXID: 243232	01-JUL-21	12-OCT-21	n/a	8519.2	0.755	9.17	0.092	0.789	0.001	2.34	0.0031	13.6	0.22	31.4	12.13	2.2	2.11	90.4	0	67.86	1.34188
E9PYL8-F1	AF-E9PYL8-F1-model_v1	ALPHAFOLD V2.0 PREDICTION FOR COILED-COIL DOMAIN-CONTAINING 192 (E9PYL8)	MOL_ID: 1; ORGANISM_SCIENTIFIC: MUS MUSCULUS; ORGANISM_TAXID: 10090	01-JUL-21	12-OCT-21	n/a	30237.9	0.739	4.92	0.05	1.6	0.002	4.36	0.0055	22.3	0.35	58.5	20.27	5.2	6.83	71.1	0	75.15	1.34174
A0A0P0Y1U5-F1	AF-A0A0P0Y1U5-F1-model_v1	ALPHAFOLD V2.0 PREDICTION FOR OS11G0291400 PROTEIN (A0A0P0Y1U5)	MOL_ID: 1; ORGANISM_SCIENTIFIC: ORYZA SATIVA SUBSP. JAPONICA; ORGANISM_TAXID: 39947	01-JUL-21	12-OCT-21	n/a	12858.2	0.707	6.72	0.068	1.04	0.0014	3.19	0.0042	22	0.35	42.8	15.2	5.53	3.05	62.1	0	72.47	1.34169
A0A0P0XZZ8-F1	AF-A0A0P0XZZ8-F1-model_v1	ALPHAFOLD V2.0 PREDICTION FOR OS11G0211200 PROTEIN (A0A0P0XZZ8)	MOL_ID: 1; ORGANISM_SCIENTIFIC: ORYZA SATIVA SUBSP. JAPONICA; ORGANISM_TAXID: 39947	01-JUL-21	12-OCT-21	n/a	2808.7	0.734	13.1	0.13	0.404	0.00052	1.64	0.0021	13.7	0.22	22	8.06	2.47	1.65	0	0	74.67	1.34146
Q8CF98-F1	AF-Q8CF98-F1-model_v1	ALPHAFOLD V2.0 PREDICTION FOR COLLECTIN-10 (Q8CF98)	MOL_ID: 1; ORGANISM_SCIENTIFIC: MUS MUSCULUS; ORGANISM_TAXID: 10090	01-JUL-21	12-OCT-21	1-27	27482.9	0.729	5.59	0.056	1.71	0.0022	3.84	0.005	18.1	0.29	51.5	19.21	4.91	4.91	20.1	7.6	81.84	1.34115
Q8IVE0-F1	AF-Q8IVE0-F1-model_v1	ALPHAFOLD V2.0 PREDICTION FOR PUTATIVE CILIARY ROOTLET COILED-COIL PROTEIN-LIKE 2 PROTEIN (Q8IVE0)	MOL_ID: 1; ORGANISM_SCIENTIFIC: HOMO SAPIENS; ORGANISM_TAXID: 9606	01-JUL-21	12-OCT-21	n/a	33366.4	0.717	4.15	0.042	1.62	0.0022	5.16	0.007	35.6	0.57	69.2	26.95	8.24	6.34	61.9	0	77.44	1.34109
F2Z398-F1	AF-F2Z398-F1-model_v1	ALPHAFOLD V2.0 PREDICTION FOR LMO7 DOWNSTREAM NEIGHBOR PROTEIN (F2Z398)	MOL_ID: 1; ORGANISM_SCIENTIFIC: HOMO SAPIENS; ORGANISM_TAXID: 9606	01-JUL-21	12-OCT-21	n/a	13271.2	0.731	6.2	0.062	0.912	0.0012	3.46	0.0044	25.7	0.4	46.4	13.61	6.83	4.81	26.4	0	54.71	1.34104
A0A1Q0YGV4-F1	AF-A0A1Q0YGV4-F1-model_v1	ALPHAFOLD V2.0 PREDICTION FOR UNCHARACTERIZED PROTEIN (A0A1Q0YGV4)	MOL_ID: 1; ORGANISM_SCIENTIFIC: ZEA MAYS; ORGANISM_TAXID: 4577	01-JUL-21	12-OCT-21	n/a	7318.8	0.755	9.87	0.1	0.73	0.00097	2.17	0.0029	12.6	0.2	29.1	10.75	2.25	2.12	90.6	0	73.01	1.34101
A0A0B4LGM3-F1	AF-A0A0B4LGM3-F1-model_v1	ALPHAFOLD V2.0 PREDICTION FOR UNCHARACTERIZED PROTEIN, ISOFORM A (A0A0B4LGM3)	MOL_ID: 1; ORGANISM_SCIENTIFIC: DROSOPHILA MELANOGASTER; ORGANISM_TAXID: 7227	01-JUL-21	12-OCT-21	1-16	11062.8	0.735	6.89	0.069	0.833	0.0011	3.11	0.0041	23.7	0.37	41.7	15.36	4.58	2.29	1.8	0	43.83	1.34084
A0A0P0W156-F1	AF-A0A0P0W156-F1-model_v1	ALPHAFOLD V2.0 PREDICTION FOR OS03G0667000 PROTEIN (A0A0P0W156)	MOL_ID: 1; ORGANISM_SCIENTIFIC: ORYZA SATIVA SUBSP. JAPONICA; ORGANISM_TAXID: 39947	01-JUL-21	12-OCT-21	n/a	18786.5	0.72	5.88	0.059	1.27	0.0016	3.64	0.0046	21.7	0.34	48.8	16.97	5.1	2.76	53.8	0	77.04	1.34066
K7MIJ9-F1	AF-K7MIJ9-F1-model_v1	ALPHAFOLD V2.0 PREDICTION FOR UNCHARACTERIZED PROTEIN (K7MIJ9)	MOL_ID: 1; ORGANISM_SCIENTIFIC: GLYCINE MAX; ORGANISM_TAXID: 3847	01-JUL-21	12-OCT-21	n/a	8616.7	0.74	9.23	0.093	0.853	0.0011	2.32	0.003	12.8	0.2	31.1	11.49	2.23	2.06	95.7	0	55.85	1.34052
A0A1D6L674-F1	AF-A0A1D6L674-F1-model_v1	ALPHAFOLD V2.0 PREDICTION FOR UNCHARACTERIZED PROTEIN (A0A1D6L674)	MOL_ID: 1; ORGANISM_SCIENTIFIC: ZEA MAYS; ORGANISM_TAXID: 4577	01-JUL-21	12-OCT-21	n/a	8065.4	0.754	9.14	0.092	0.748	0.001	2.35	0.0031	14.9	0.24	31.5	12.36	2.8	1.93	76.5	0	84.74	1.34043
F1RCD0-F1	AF-F1RCD0-F1-model_v1	ALPHAFOLD V2.0 PREDICTION FOR COILED-COIL DOMAIN-CONTAINING 12 (F1RCD0)	MOL_ID: 1; ORGANISM_SCIENTIFIC: DANIO RERIO; ORGANISM_TAXID: 7955	01-JUL-21	12-OCT-21	n/a	18512.1	0.732	5.6	0.056	1.15	0.0015	3.82	0.0049	25.5	0.4	51.2	17.77	6.97	4.05	53.7	0	75.1	1.34031
A0A1D8PIH1-F1	AF-A0A1D8PIH1-F1-model_v1	ALPHAFOLD V2.0 PREDICTION FOR T-SNARE COILED-COIL HOMOLOGY DOMAIN-CONTAINING PROTEIN (A0A1D8PIH1)	MOL_ID: 1; ORGANISM_SCIENTIFIC: CANDIDA ALBICANS (STRAIN SC5314 / ATCC MYA-2876); ORGANISM_TAXID: 237561	01-JUL-21	12-OCT-21	n/a	17123.4	0.735	6.28	0.063	1.17	0.0015	3.41	0.0043	18.8	0.3	45.7	15.35	5.37	3.41	65.8	0	74.36	1.34018
K7MWE7-F1	AF-K7MWE7-F1-model_v1	ALPHAFOLD V2.0 PREDICTION FOR UNCHARACTERIZED PROTEIN (K7MWE7)	MOL_ID: 1; ORGANISM_SCIENTIFIC: GLYCINE MAX; ORGANISM_TAXID: 3847	01-JUL-21	12-OCT-21	n/a	61801.2	0.733	3.65	0.037	2.48	0.0033	5.88	0.0077	28.9	0.46	78.8	30.11	8.04	4.91	86.5	0	82.31	1.34014
A0A0R0GLN2-F1	AF-A0A0R0GLN2-F1-model_v1	ALPHAFOLD V2.0 PREDICTION FOR ION_TRANS DOMAIN-CONTAINING PROTEIN (A0A0R0GLN2)	MOL_ID: 1; ORGANISM_SCIENTIFIC: GLYCINE MAX; ORGANISM_TAXID: 3847	01-JUL-21	12-OCT-21	n/a	10802	0.75	8.56	0.086	0.954	0.0012	2.5	0.0033	12.8	0.2	33.5	11.51	3.4	3.14	91	0	84.47	1.34
Q6IGN6-F1	AF-Q6IGN6-F1-model_v1	ALPHAFOLD V2.0 PREDICTION FOR HDC05827 (Q6IGN6)	MOL_ID: 1; ORGANISM_SCIENTIFIC: DROSOPHILA MELANOGASTER; ORGANISM_TAXID: 7227	01-JUL-21	12-OCT-21	n/a	9905.9	0.748	8.46	0.085	0.871	0.0011	2.53	0.0033	13.9	0.22	33.9	11.49	4.51	2.74	58.6	0	84.43	1.33992
Q8IYT3-F1	AF-Q8IYT3-F1-model_v1	ALPHAFOLD V2.0 PREDICTION FOR COILED-COIL DOMAIN-CONTAINING PROTEIN 170 (Q8IYT3)	MOL_ID: 1; ORGANISM_SCIENTIFIC: HOMO SAPIENS; ORGANISM_TAXID: 9606	01-JUL-21	12-OCT-21	n/a	82285.3	0.736	2.94	0.03	2.63	0.0034	7.3	0.0093	39.8	0.63	97.8	36.24	10.82	10.4	83.5	0	82.14	1.33973
Q4V328-F1	AF-Q4V328-F1-model_v1	ALPHAFOLD V2.0 PREDICTION FOR GRIP1-ASSOCIATED PROTEIN 1 (Q4V328)	MOL_ID: 1; ORGANISM_SCIENTIFIC: HOMO SAPIENS; ORGANISM_TAXID: 9606	01-JUL-21	12-OCT-21	n/a	95983.4	0.729	2.52	0.025	2.7	0.0037	8.51	0.012	57.8	0.92	114	47.06	15.15	10.29	80.6	0	77.85	1.3396
K7LLP2-F1	AF-K7LLP2-F1-model_v1	ALPHAFOLD V2.0 PREDICTION FOR UNCHARACTERIZED PROTEIN (K7LLP2)	MOL_ID: 1; ORGANISM_SCIENTIFIC: GLYCINE MAX; ORGANISM_TAXID: 3847	01-JUL-21	12-OCT-21	n/a	8878.6	0.748	7.92	0.08	0.731	0.00093	2.71	0.0035	19.9	0.31	36.3	12.99	4.66	3.26	30	0	48	1.33948
Q4DYQ9-F1	AF-Q4DYQ9-F1-model_v1	ALPHAFOLD V2.0 PREDICTION FOR UNCHARACTERIZED PROTEIN (Q4DYQ9)	MOL_ID: 1; ORGANISM_SCIENTIFIC: TRYPANOSOMA CRUZI (STRAIN CL BRENER); ORGANISM_TAXID: 353153	01-JUL-21	12-OCT-21	n/a	96661.4	0.736	3.1	0.031	3.27	0.0044	6.9	0.0093	31.1	0.49	92.4	36.17	11.99	7.88	22.4	22.2	82.41	1.33913
Q54YR1-F1	AF-Q54YR1-F1-model_v1	ALPHAFOLD V2.0 PREDICTION FOR UNCHARACTERIZED PROTEIN (Q54YR1)	MOL_ID: 1; ORGANISM_SCIENTIFIC: DICTYOSTELIUM DISCOIDEUM; ORGANISM_TAXID: 44689	01-JUL-21	12-OCT-21	n/a	10200.7	0.678	7.27	0.073	0.983	0.0013	2.95	0.0038	22.3	0.35	39.5	14.22	4.54	3.26	21.6	0	58.31	1.33898
Q4E139-F1	AF-Q4E139-F1-model_v1	ALPHAFOLD V2.0 PREDICTION FOR UNCHARACTERIZED PROTEIN (Q4E139)	MOL_ID: 1; ORGANISM_SCIENTIFIC: TRYPANOSOMA CRUZI (STRAIN CL BRENER); ORGANISM_TAXID: 353153	01-JUL-21	12-OCT-21	n/a	82371	0.742	3.91	0.039	3.43	0.0042	5.48	0.0067	16.9	0.26	73.3	24.63	11.04	6.45	61.2	5.1	83.46	1.33759
Q2V478-F1	AF-Q2V478-F1-model_v1	ALPHAFOLD V2.0 PREDICTION FOR TRANSMEMBRANE PROTEIN (Q2V478)	MOL_ID: 1; ORGANISM_SCIENTIFIC: ARABIDOPSIS THALIANA; ORGANISM_TAXID: 3702	01-JUL-21	12-OCT-21	n/a	9450.2	0.757	7.85	0.079	0.743	0.00098	2.73	0.0036	19.1	0.3	36.5	13.93	3.99	2.53	34.5	0	66.79	1.337
Q0DNM9-F1	AF-Q0DNM9-F1-model_v1	ALPHAFOLD V2.0 PREDICTION FOR OS03G0745550 PROTEIN (Q0DNM9)	MOL_ID: 1; ORGANISM_SCIENTIFIC: ORYZA SATIVA SUBSP. JAPONICA; ORGANISM_TAXID: 39947	01-JUL-21	12-OCT-21	n/a	7497.8	0.721	7.84	0.079	0.676	0.00094	2.73	0.0038	24.9	0.4	36.5	12.95	5.01	4.94	26.1	0	53.26	1.337
Q21695-F1	AF-Q21695-F1-model_v1	ALPHAFOLD V2.0 PREDICTION FOR UNCHARACTERIZED PROTEIN (Q21695)	MOL_ID: 1; ORGANISM_SCIENTIFIC: CAENORHABDITIS ELEGANS; ORGANISM_TAXID: 6239	01-JUL-21	12-OCT-21	n/a	12074	0.748	7.75	0.078	0.973	0.0013	2.76	0.0036	16.1	0.25	36.9	13.61	4.23	3.12	52	5.9	64.17	1.33696
Q3SX64-F1	AF-Q3SX64-F1-model_v1	ALPHAFOLD V2.0 PREDICTION FOR OUTER DENSE FIBER PROTEIN 3-LIKE PROTEIN 2 (Q3SX64)	MOL_ID: 1; ORGANISM_SCIENTIFIC: HOMO SAPIENS; ORGANISM_TAXID: 9606	01-JUL-21	12-OCT-21	n/a	30803.9	0.726	4.17	0.042	1.45	0.0018	5.14	0.0063	36.5	0.57	68.7	22.24	9.3	8.86	3.8	0	67.34	1.33658
A0A0R0K648-F1	AF-A0A0R0K648-F1-model_v1	ALPHAFOLD V2.0 PREDICTION FOR UNCHARACTERIZED PROTEIN (A0A0R0K648)	MOL_ID: 1; ORGANISM_SCIENTIFIC: GLYCINE MAX; ORGANISM_TAXID: 3847	01-JUL-21	12-OCT-21	n/a	7876.4	0.744	9.6	0.097	0.798	0.001	2.23	0.0029	12.6	0.2	29.8	11.38	2.52	2.37	78.1	0	75.93	1.33632
A0A0P0WKK7-F1	AF-A0A0P0WKK7-F1-model_v1	ALPHAFOLD V2.0 PREDICTION FOR OS05G0311037 PROTEIN (A0A0P0WKK7)	MOL_ID: 1; ORGANISM_SCIENTIFIC: ORYZA SATIVA SUBSP. JAPONICA; ORGANISM_TAXID: 39947	01-JUL-21	12-OCT-21	n/a	13563.4	0.743	6.38	0.064	0.917	0.0012	3.36	0.0043	24.2	0.38	44.9	16.52	6.36	2.89	54.4	0	66.78	1.33631
Q3LI54-F1	AF-Q3LI54-F1-model_v1	ALPHAFOLD V2.0 PREDICTION FOR KERATIN-ASSOCIATED PROTEIN 19-8 (Q3LI54)	MOL_ID: 1; ORGANISM_SCIENTIFIC: HOMO SAPIENS; ORGANISM_TAXID: 9606	01-JUL-21	12-OCT-21	n/a	6922.3	0.704	8.79	0.089	0.742	0.00093	2.44	0.0031	17.6	0.28	32.6	11.01	4.66	3.31	8.1	0	51.73	1.33607
Q55E36-F1	AF-Q55E36-F1-model_v1	ALPHAFOLD V2.0 PREDICTION FOR UNCHARACTERIZED PROTEIN (Q55E36)	MOL_ID: 1; ORGANISM_SCIENTIFIC: DICTYOSTELIUM DISCOIDEUM; ORGANISM_TAXID: 44689	01-JUL-21	12-OCT-21	n/a	8867.4	0.743	8.47	0.085	0.796	0.001	2.53	0.0033	16.6	0.26	33.8	12.76	2.93	2.21	79.5	0	85.23	1.33597
A0A0R0HHS0-F1	AF-A0A0R0HHS0-F1-model_v1	ALPHAFOLD V2.0 PREDICTION FOR UNCHARACTERIZED PROTEIN (A0A0R0HHS0)	MOL_ID: 1; ORGANISM_SCIENTIFIC: GLYCINE MAX; ORGANISM_TAXID: 3847	01-JUL-21	12-OCT-21	n/a	9887.5	0.742	7.99	0.081	0.84	0.0011	2.68	0.0035	17.6	0.28	35.8	13.41	3.69	2.81	75	0	58.46	1.33582
Q7Z4W3-F1	AF-Q7Z4W3-F1-model_v1	ALPHAFOLD V2.0 PREDICTION FOR KERATIN-ASSOCIATED PROTEIN 19-3 (Q7Z4W3)	MOL_ID: 1; ORGANISM_SCIENTIFIC: HOMO SAPIENS; ORGANISM_TAXID: 9606	01-JUL-21	12-OCT-21	n/a	8250.6	0.695	7.9	0.08	0.819	0.0011	2.71	0.0036	20.4	0.32	36.2	12.93	4.77	4.5	7.5	0	51.32	1.33579
Q9SAG2-F1	AF-Q9SAG2-F1-model_v1	ALPHAFOLD V2.0 PREDICTION FOR AT1G80980 (Q9SAG2)	MOL_ID: 1; ORGANISM_SCIENTIFIC: ARABIDOPSIS THALIANA; ORGANISM_TAXID: 3702	01-JUL-21	12-OCT-21	n/a	24633.4	0.737	4.83	0.049	1.29	0.0016	4.44	0.0055	28.9	0.45	59.3	19.14	8.06	4.44	51.6	0	67.53	1.33559
Q10JB9-F1	AF-Q10JB9-F1-model_v1	ALPHAFOLD V2.0 PREDICTION FOR OS03G0426100 PROTEIN (Q10JB9)	MOL_ID: 1; ORGANISM_SCIENTIFIC: ORYZA SATIVA SUBSP. JAPONICA; ORGANISM_TAXID: 39947	01-JUL-21	12-OCT-21	n/a	11654.4	0.719	6.91	0.07	0.932	0.0012	3.1	0.0041	22.9	0.36	41.4	15.4	5.01	3.39	51.5	0	63.39	1.33548
Q6K8T9-F1	AF-Q6K8T9-F1-model_v1	ALPHAFOLD V2.0 PREDICTION FOR OS02G0616232 PROTEIN (Q6K8T9)	MOL_ID: 1; ORGANISM_SCIENTIFIC: ORYZA SATIVA SUBSP. JAPONICA; ORGANISM_TAXID: 39947	01-JUL-21	12-OCT-21	n/a	11046.1	0.733	6.41	0.065	0.78	0.001	3.34	0.0044	29.2	0.46	44.6	15.79	7.82	3.03	22.1	0	59.66	1.33533
Q4CPK9-F1	AF-Q4CPK9-F1-model_v1	ALPHAFOLD V2.0 PREDICTION FOR MUCIN TCMUCII, PUTATIVE (Q4CPK9)	MOL_ID: 1; ORGANISM_SCIENTIFIC: TRYPANOSOMA CRUZI (STRAIN CL BRENER); ORGANISM_TAXID: 353153	01-JUL-21	12-OCT-21	1-25	3407.1	0.719	12.4	0.12	0.488	0.00061	1.73	0.0022	13.1	0.21	23.1	7.95	3.04	1.62	9.7	0	58.24	1.33526
A0A0R0LAY5-F1	AF-A0A0R0LAY5-F1-model_v1	ALPHAFOLD V2.0 PREDICTION FOR UNCHARACTERIZED PROTEIN (A0A0R0LAY5)	MOL_ID: 1; ORGANISM_SCIENTIFIC: GLYCINE MAX; ORGANISM_TAXID: 3847	01-JUL-21	12-OCT-21	n/a	79232.2	0.727	2.75	0.028	2.45	0.0034	7.79	0.011	53.9	0.86	104	41.52	11.3	10.09	67	0	74.58	1.33504
Q9SKG1-F1	AF-Q9SKG1-F1-model_v1	ALPHAFOLD V2.0 PREDICTION FOR BZIP TRANSCRIPTION FACTOR FAMILY PROTEIN (Q9SKG1)	MOL_ID: 1; ORGANISM_SCIENTIFIC: ARABIDOPSIS THALIANA; ORGANISM_TAXID: 3702	01-JUL-21	12-OCT-21	n/a	30077.4	0.736	4.66	0.047	1.52	0.0019	4.6	0.0057	26.6	0.42	61.4	21.18	8.24	6.23	56.6	0	76.77	1.33478
K7K0Z4-F1	AF-K7K0Z4-F1-model_v1	ALPHAFOLD V2.0 PREDICTION FOR UNCHARACTERIZED PROTEIN (K7K0Z4)	MOL_ID: 1; ORGANISM_SCIENTIFIC: GLYCINE MAX; ORGANISM_TAXID: 3847	01-JUL-21	12-OCT-21	n/a	8067.3	0.733	8.86	0.089	0.786	0.0011	2.42	0.0033	16.5	0.26	32.3	12.76	2.15	2.22	79.4	0	83.3	1.33471
Q63279-F1	AF-Q63279-F1-model_v1	ALPHAFOLD V2.0 PREDICTION FOR KERATIN, TYPE I CYTOSKELETAL 19 (Q63279)	MOL_ID: 1; ORGANISM_SCIENTIFIC: RATTUS NORVEGICUS; ORGANISM_TAXID: 10116	01-JUL-21	12-OCT-21	n/a	44632.9	0.73	4.22	0.043	2.1	0.0027	5.08	0.0065	24.6	0.39	67.8	24.6	6.76	5.69	71.6	1	79.68	1.33465
C6S3E8-F1	AF-C6S3E8-F1-model_v1	ALPHAFOLD V2.0 PREDICTION FOR UNCHARACTERIZED PROTEIN (C6S3E8)	MOL_ID: 1; ORGANISM_SCIENTIFIC: PLASMODIUM FALCIPARUM (ISOLATE 3D7); ORGANISM_TAXID: 36329	01-JUL-21	12-OCT-21	n/a	10063.5	0.751	8.06	0.081	0.833	0.0011	2.66	0.0036	17.1	0.27	35.5	13.18	3.85	2.44	85.2	0	76.45	1.33459
Q3EB02-F1	AF-Q3EB02-F1-model_v1	ALPHAFOLD V2.0 PREDICTION FOR ANTHER-SPECIFIC PROTEIN AGP1-LIKE PROTEIN (Q3EB02)	MOL_ID: 1; ORGANISM_SCIENTIFIC: ARABIDOPSIS THALIANA; ORGANISM_TAXID: 3702	01-JUL-21	12-OCT-21	1-22	10336.1	0.71	7.31	0.074	0.903	0.0011	2.93	0.0037	20	0.31	39.1	13.37	5.54	3.01	20.9	0	54.47	1.33447
A0A0G2JTX3-F1	AF-A0A0G2JTX3-F1-model_v1	ALPHAFOLD V2.0 PREDICTION FOR UNCHARACTERIZED PROTEIN (A0A0G2JTX3)	MOL_ID: 1; ORGANISM_SCIENTIFIC: RATTUS NORVEGICUS; ORGANISM_TAXID: 10116	01-JUL-21	12-OCT-21	n/a	10182.3	0.699	6.64	0.067	0.839	0.0011	3.23	0.0043	28.7	0.46	43.1	14.87	8.81	3.51	0	0	49.09	1.33437
P0C7P4-F1	AF-P0C7P4-F1-model_v1	ALPHAFOLD V2.0 PREDICTION FOR PUTATIVE CYTOCHROME B-C1 COMPLEX SUBUNIT RIESKE-LIKE PROTEIN 1 (P0C7P4)	MOL_ID: 1; ORGANISM_SCIENTIFIC: HOMO SAPIENS; ORGANISM_TAXID: 9606	01-JUL-21	12-OCT-21	n/a	30825.5	0.74	5.34	0.054	1.76	0.0022	4.01	0.0049	17	0.27	53.5	16.78	5.05	6.75	22	10.3	78.43	1.33416
A0A2R8QHX1-F1	AF-A0A2R8QHX1-F1-model_v1	ALPHAFOLD V2.0 PREDICTION FOR UNCHARACTERIZED PROTEIN (A0A2R8QHX1)	MOL_ID: 1; ORGANISM_SCIENTIFIC: DANIO RERIO; ORGANISM_TAXID: 7955	01-JUL-21	12-OCT-21	n/a	54014.8	0.732	3.8	0.038	2.27	0.003	5.63	0.0074	29.4	0.46	75.1	28.05	11.15	4.77	79.5	0	79.76	1.33393
E1JGT2-F1	AF-E1JGT2-F1-model_v1	ALPHAFOLD V2.0 PREDICTION FOR UNCHARACTERIZED PROTEIN (E1JGT2)	MOL_ID: 1; ORGANISM_SCIENTIFIC: DROSOPHILA MELANOGASTER; ORGANISM_TAXID: 7227	01-JUL-21	12-OCT-21	n/a	8762.5	0.74	8.41	0.085	0.79	0.0011	2.55	0.0035	17.6	0.28	34	13.07	3.47	2.32	70.1	0	71.27	1.33333
A0A0R0I3Y6-F1	AF-A0A0R0I3Y6-F1-model_v1	ALPHAFOLD V2.0 PREDICTION FOR UNCHARACTERIZED PROTEIN (A0A0R0I3Y6)	MOL_ID: 1; ORGANISM_SCIENTIFIC: GLYCINE MAX; ORGANISM_TAXID: 3847	01-JUL-21	12-OCT-21	n/a	8066.8	0.743	8.93	0.09	0.764	0.001	2.4	0.0032	15.3	0.24	32	11.26	3.51	2.19	77.9	0	73.99	1.33333
A0A1D6LTS3-F1	AF-A0A1D6LTS3-F1-model_v1	ALPHAFOLD V2.0 PREDICTION FOR AUGMIN SUBUNIT 3 (A0A1D6LTS3)	MOL_ID: 1; ORGANISM_SCIENTIFIC: ZEA MAYS; ORGANISM_TAXID: 4577	01-JUL-21	12-OCT-21	n/a	69671	0.734	3.47	0.035	2.65	0.0035	6.18	0.0082	28.7	0.46	82.4	28.07	13.04	6	78.9	0	77.12	1.33333
Q4W5P6-F1	AF-Q4W5P6-F1-model_v1	ALPHAFOLD V2.0 PREDICTION FOR SMALL INTEGRAL MEMBRANE PROTEIN 43 (Q4W5P6)	MOL_ID: 1; ORGANISM_SCIENTIFIC: HOMO SAPIENS; ORGANISM_TAXID: 9606	01-JUL-21	12-OCT-21	n/a	7325	0.769	9.55	0.096	0.667	0.00088	2.25	0.003	14	0.22	30	11.28	2.35	2.59	66.1	0	76.6	1.33333
F4IG63-F1	AF-F4IG63-F1-model_v1	ALPHAFOLD V2.0 PREDICTION FOR SMAD/FHA DOMAIN-CONTAINING PROTEIN (F4IG63)	MOL_ID: 1; ORGANISM_SCIENTIFIC: ARABIDOPSIS THALIANA; ORGANISM_TAXID: 3702	01-JUL-21	12-OCT-21	n/a	101521	0.718	2.38	0.024	2.81	0.0038	9	0.012	62.7	1	120	49.25	12.07	12.63	38.1	3.8	67.04	1.33333
Q54R21-F1	AF-Q54R21-F1-model_v1	ALPHAFOLD V2.0 PREDICTION FOR PUTATIVE UNCHARACTERIZED PROTEIN DDB_G0283431 (Q54R21)	MOL_ID: 1; ORGANISM_SCIENTIFIC: DICTYOSTELIUM DISCOIDEUM; ORGANISM_TAXID: 44689	01-JUL-21	12-OCT-21	n/a	13003.7	0.664	6.67	0.067	1.2	0.0016	3.21	0.0042	21.8	0.34	42.8	15.79	4.2	3.81	18.8	0	62.7	1.33333
Q9BVX2-F1	AF-Q9BVX2-F1-model_v1	ALPHAFOLD V2.0 PREDICTION FOR TRANSMEMBRANE PROTEIN 106C (Q9BVX2)	MOL_ID: 1; ORGANISM_SCIENTIFIC: HOMO SAPIENS; ORGANISM_TAXID: 9606	01-JUL-21	12-OCT-21	n/a	27876.5	0.74	5.32	0.054	1.59	0.0021	4.03	0.0054	21.6	0.35	53.7	18.5	10.69	4.07	20.1	33.7	81.06	1.33251
Q4DDC4-F1	AF-Q4DDC4-F1-model_v1	ALPHAFOLD V2.0 PREDICTION FOR TUZIN (Q4DDC4)	MOL_ID: 1; ORGANISM_SCIENTIFIC: TRYPANOSOMA CRUZI (STRAIN CL BRENER); ORGANISM_TAXID: 353153	01-JUL-21	12-OCT-21	n/a	19141.3	0.734	6.48	0.065	1.36	0.0018	3.31	0.0043	17.5	0.28	44.1	16.67	4.79	3.41	71	0	83.39	1.33233
P0C2S0-F1	AF-P0C2S0-F1-model_v1	ALPHAFOLD V2.0 PREDICTION FOR CORTEXIN-2 (P0C2S0)	MOL_ID: 1; ORGANISM_SCIENTIFIC: HOMO SAPIENS; ORGANISM_TAXID: 9606	01-JUL-21	12-OCT-21	n/a	8976.4	0.741	8.18	0.083	0.785	0.0011	2.62	0.0036	17.6	0.28	34.9	13.96	4.62	2.78	53.8	0	70.16	1.33206
Q15323-F1	AF-Q15323-F1-model_v1	ALPHAFOLD V2.0 PREDICTION FOR KERATIN, TYPE I CUTICULAR HA1 (Q15323)	MOL_ID: 1; ORGANISM_SCIENTIFIC: HOMO SAPIENS; ORGANISM_TAXID: 9606	01-JUL-21	12-OCT-21	n/a	47226	0.724	4.14	0.042	2.22	0.0028	5.18	0.0066	24.8	0.39	69	24.89	8.01	5.29	71.1	0	78.71	1.33205
F1LZR0-F1	AF-F1LZR0-F1-model_v1	ALPHAFOLD V2.0 PREDICTION FOR KERATIN-ASSOCIATED PROTEIN 19-5 (F1LZR0)	MOL_ID: 1; ORGANISM_SCIENTIFIC: RATTUS NORVEGICUS; ORGANISM_TAXID: 10116	01-JUL-21	12-OCT-21	n/a	7293.9	0.7	8.91	0.09	0.803	0.001	2.41	0.0031	16.1	0.25	32.1	11.6	4.45	2.6	16.9	0	49.82	1.33195
Q9Y592-F1	AF-Q9Y592-F1-model_v1	ALPHAFOLD V2.0 PREDICTION FOR CENTROSOMAL PROTEIN OF 83 KDA (Q9Y592)	MOL_ID: 1; ORGANISM_SCIENTIFIC: HOMO SAPIENS; ORGANISM_TAXID: 9606	01-JUL-21	12-OCT-21	n/a	82943.3	0.736	3.01	0.03	2.72	0.0036	7.11	0.0093	37.5	0.59	94.7	34.09	10.26	6.76	87	0	81.43	1.33193
Q9BWJ2-F1	AF-Q9BWJ2-F1-model_v1	ALPHAFOLD V2.0 PREDICTION FOR PUTATIVE UNCHARACTERIZED PROTEIN ENCODED BY RHPN1-AS1 (Q9BWJ2)	MOL_ID: 1; ORGANISM_SCIENTIFIC: HOMO SAPIENS; ORGANISM_TAXID: 9606	01-JUL-21	12-OCT-21	n/a	6659.3	0.723	9.73	0.098	0.74	0.0009	2.2	0.0027	13.5	0.21	29.3	9.24	4.28	2.77	34.5	0	63.6	1.33182
P58042-F1	AF-P58042-F1-model_v1	ALPHAFOLD V2.0 PREDICTION FOR PROPHAGE OUTER MEMBRANE LIPOPROTEIN RZOR (P58042)	MOL_ID: 1; ORGANISM_SCIENTIFIC: ESCHERICHIA COLI (STRAIN K12); ORGANISM_TAXID: 83333	01-JUL-21	12-OCT-21	1-19	4586.7	0.728	11.3	0.11	0.579	0.00076	1.9	0.0025	13.6	0.21	25.3	9.06	3.22	1.83	24.4	0	85.33	1.33158
A0A0P0XVI5-F1	AF-A0A0P0XVI5-F1-model_v1	ALPHAFOLD V2.0 PREDICTION FOR OS10G0488850 PROTEIN (A0A0P0XVI5)	MOL_ID: 1; ORGANISM_SCIENTIFIC: ORYZA SATIVA SUBSP. JAPONICA; ORGANISM_TAXID: 39947	01-JUL-21	12-OCT-21	n/a	12347.5	0.731	6.17	0.062	0.845	0.0012	3.47	0.0048	31	0.49	46.2	18.41	5.13	4.12	6.4	0	51	1.33141
Q9H3Y8-F1	AF-Q9H3Y8-F1-model_v1	ALPHAFOLD V2.0 PREDICTION FOR PANCREATIC PROGENITOR CELL DIFFERENTIATION AND PROLIFERATION FACTOR (Q9H3Y8)	MOL_ID: 1; ORGANISM_SCIENTIFIC: HOMO SAPIENS; ORGANISM_TAXID: 9606	01-JUL-21	12-OCT-21	n/a	11779.6	0.714	6.39	0.064	0.888	0.0012	3.35	0.0044	27.9	0.44	44.6	15.18	6.34	4.51	15.9	0	59.5	1.33134
Q5ABV6-F1	AF-Q5ABV6-F1-model_v1	ALPHAFOLD V2.0 PREDICTION FOR SWI5-DEPENDENT HO EXPRESSION PROTEIN 3 (Q5ABV6)	MOL_ID: 1; ORGANISM_SCIENTIFIC: CANDIDA ALBICANS (STRAIN SC5314 / ATCC MYA-2876); ORGANISM_TAXID: 237561	01-JUL-21	12-OCT-21	n/a	59238.2	0.713	3.21	0.032	2.25	0.003	6.67	0.0089	42.6	0.67	88.8	35.08	9.75	8.73	47.9	0	66.86	1.33133
A0A2R8Q1E9-F1	AF-A0A2R8Q1E9-F1-model_v1	ALPHAFOLD V2.0 PREDICTION FOR UNCHARACTERIZED PROTEIN (A0A2R8Q1E9)	MOL_ID: 1; ORGANISM_SCIENTIFIC: DANIO RERIO; ORGANISM_TAXID: 7955	01-JUL-21	12-OCT-21	n/a	20080	0.751	6.46	0.065	1.33	0.0016	3.32	0.004	15	0.23	44.2	14.4	5.55	3.82	39.5	5.2	65.5	1.33133
Q1JPP8-F1	AF-Q1JPP8-F1-model_v1	ALPHAFOLD V2.0 PREDICTION FOR CYCLIN-DEPENDENT PROTEIN KINASE INHIBITOR SMR4 (Q1JPP8)	MOL_ID: 1; ORGANISM_SCIENTIFIC: ARABIDOPSIS THALIANA; ORGANISM_TAXID: 3702	01-JUL-21	12-OCT-21	n/a	8328.8	0.73	7.64	0.077	0.708	0.0009	2.81	0.0036	22.1	0.35	37.4	10.84	6.08	4.61	9.9	0	80.69	1.33096
A0A0P0XDJ7-F1	AF-A0A0P0XDJ7-F1-model_v1	ALPHAFOLD V2.0 PREDICTION FOR OS08G0243833 PROTEIN (A0A0P0XDJ7)	MOL_ID: 1; ORGANISM_SCIENTIFIC: ORYZA SATIVA SUBSP. JAPONICA; ORGANISM_TAXID: 39947	01-JUL-21	12-OCT-21	n/a	9852.6	0.721	7.87	0.079	0.892	0.0011	2.72	0.0032	16.7	0.26	36.2	11.03	6.85	2.76	49.4	0	62.19	1.33088
I1K320-F1	AF-I1K320-F1-model_v1	ALPHAFOLD V2.0 PREDICTION FOR UNCHARACTERIZED PROTEIN (I1K320)	MOL_ID: 1; ORGANISM_SCIENTIFIC: GLYCINE MAX; ORGANISM_TAXID: 3847	01-JUL-21	12-OCT-21	n/a	8885.1	0.753	8.76	0.088	0.793	0.001	2.45	0.0031	14.5	0.23	32.6	11.64	3.39	2.84	89	0	70.18	1.33061
A0A0P0V8Y9-F1	AF-A0A0P0V8Y9-F1-model_v1	ALPHAFOLD V2.0 PREDICTION FOR OS01G0777101 PROTEIN (A0A0P0V8Y9)	MOL_ID: 1; ORGANISM_SCIENTIFIC: ORYZA SATIVA SUBSP. JAPONICA; ORGANISM_TAXID: 39947	01-JUL-21	12-OCT-21	n/a	8387.6	0.75	9.07	0.091	0.785	0.001	2.36	0.003	13.7	0.22	31.4	11.52	3.04	2.24	81.4	0	62.16	1.33051
A0A0R0K402-F1	AF-A0A0R0K402-F1-model_v1	ALPHAFOLD V2.0 PREDICTION FOR UNCHARACTERIZED PROTEIN (A0A0R0K402)	MOL_ID: 1; ORGANISM_SCIENTIFIC: GLYCINE MAX; ORGANISM_TAXID: 3847	01-JUL-21	12-OCT-21	n/a	7532.2	0.762	9.18	0.093	0.679	0.0009	2.33	0.0031	15.3	0.24	31	11.68	3.27	2.43	73.8	0	66.79	1.33047
A0A1D8PTH5-F1	AF-A0A1D8PTH5-F1-model_v1	ALPHAFOLD V2.0 PREDICTION FOR UNCHARACTERIZED PROTEIN (A0A1D8PTH5)	MOL_ID: 1; ORGANISM_SCIENTIFIC: CANDIDA ALBICANS (STRAIN SC5314 / ATCC MYA-2876); ORGANISM_TAXID: 237561	01-JUL-21	12-OCT-21	n/a	40902	0.733	4.63	0.047	2.08	0.0027	4.63	0.006	21.2	0.33	61.6	22.02	7.11	5.64	68	2.2	68.15	1.33045
U4PLJ0-F1	AF-U4PLJ0-F1-model_v1	ALPHAFOLD V2.0 PREDICTION FOR UNCHARACTERIZED PROTEIN (U4PLJ0)	MOL_ID: 1; ORGANISM_SCIENTIFIC: CAENORHABDITIS ELEGANS; ORGANISM_TAXID: 6239	01-JUL-21	12-OCT-21	n/a	4325.1	0.701	10.4	0.1	0.555	0.00069	2.06	0.0026	17.1	0.27	27.4	9.38	3.56	2.53	0	0	67.48	1.3301
Q24404-F1	AF-Q24404-F1-model_v1	ALPHAFOLD V2.0 PREDICTION FOR LP10995P (Q24404)	MOL_ID: 1; ORGANISM_SCIENTIFIC: DROSOPHILA MELANOGASTER; ORGANISM_TAXID: 7227	01-JUL-21	12-OCT-21	n/a	27927.1	0.731	5.2	0.052	1.61	0.0021	4.12	0.0054	21.7	0.34	54.8	19.35	5.3	5.48	1.5	30.3	57	1.3301
A0A1D6F744-F1	AF-A0A1D6F744-F1-model_v1	ALPHAFOLD V2.0 PREDICTION FOR UNCHARACTERIZED PROTEIN (A0A1D6F744)	MOL_ID: 1; ORGANISM_SCIENTIFIC: ZEA MAYS; ORGANISM_TAXID: 4577	01-JUL-21	12-OCT-21	n/a	14257.6	0.739	7.28	0.073	1.12	0.0015	2.94	0.0039	15.9	0.25	39.1	14.26	3.9	3.19	83.6	0	70.18	1.32993
Q86D01-F1	AF-Q86D01-F1-model_v1	ALPHAFOLD V2.0 PREDICTION FOR UNCHARACTERIZED PROTEIN (Q86D01)	MOL_ID: 1; ORGANISM_SCIENTIFIC: CAENORHABDITIS ELEGANS; ORGANISM_TAXID: 6239	01-JUL-21	12-OCT-21	n/a	81778.5	0.73	2.74	0.028	2.49	0.0033	7.82	0.01	49.1	0.78	104	38.83	13.02	10.37	57.4	0	69.02	1.32992
Q4DTT2-F1	AF-Q4DTT2-F1-model_v1	ALPHAFOLD V2.0 PREDICTION FOR UNCHARACTERIZED PROTEIN (Q4DTT2)	MOL_ID: 1; ORGANISM_SCIENTIFIC: TRYPANOSOMA CRUZI (STRAIN CL BRENER); ORGANISM_TAXID: 353153	01-JUL-21	12-OCT-21	n/a	9633.7	0.727	7.86	0.079	0.852	0.0012	2.73	0.0037	19.2	0.31	36.3	12.66	5.76	3.46	64.7	0	77.86	1.32967
P35242-F1	AF-P35242-F1-model_v1	ALPHAFOLD V2.0 PREDICTION FOR PULMONARY SURFACTANT-ASSOCIATED PROTEIN A (P35242)	MOL_ID: 1; ORGANISM_SCIENTIFIC: MUS MUSCULUS; ORGANISM_TAXID: 10090	01-JUL-21	12-OCT-21	1-20	24096.4	0.721	6.19	0.062	1.71	0.0022	3.46	0.0045	15.2	0.24	46	16.77	5.69	4.02	19.4	9.2	87.65	1.32948
A0A1D6P9X6-F1	AF-A0A1D6P9X6-F1-model_v1	ALPHAFOLD V2.0 PREDICTION FOR UNCHARACTERIZED PROTEIN (A0A1D6P9X6)	MOL_ID: 1; ORGANISM_SCIENTIFIC: ZEA MAYS; ORGANISM_TAXID: 4577	01-JUL-21	12-OCT-21	n/a	15433.2	0.72	6.3	0.063	1.12	0.0015	3.4	0.0044	22.1	0.35	45.2	15.66	5.05	4.12	65	0	77.49	1.32941
A0A1W5PW65-F1	AF-A0A1W5PW65-F1-model_v1	ALPHAFOLD V2.0 PREDICTION FOR UNCHARACTERIZED PROTEIN (A0A1W5PW65)	MOL_ID: 1; ORGANISM_SCIENTIFIC: DROSOPHILA MELANOGASTER; ORGANISM_TAXID: 7227	01-JUL-21	12-OCT-21	n/a	3058	0.738	12.9	0.13	0.425	0.00054	1.67	0.0021	13	0.2	22.2	7.94	2.82	1.91	0	0	76.27	1.32934
Q5JTB6-F1	AF-Q5JTB6-F1-model_v1	ALPHAFOLD V2.0 PREDICTION FOR PLACENTA-SPECIFIC PROTEIN 9 (Q5JTB6)	MOL_ID: 1; ORGANISM_SCIENTIFIC: HOMO SAPIENS; ORGANISM_TAXID: 9606	01-JUL-21	12-OCT-21	1-22	8138.8	0.732	8.7	0.088	0.783	0.001	2.46	0.0033	16.9	0.27	32.7	12.45	4.04	2.73	64.9	0	80.78	1.32927
Q4DTQ9-F1	AF-Q4DTQ9-F1-model_v1	ALPHAFOLD V2.0 PREDICTION FOR UNCHARACTERIZED PROTEIN (Q4DTQ9)	MOL_ID: 1; ORGANISM_SCIENTIFIC: TRYPANOSOMA CRUZI (STRAIN CL BRENER); ORGANISM_TAXID: 353153	01-JUL-21	12-OCT-21	n/a	16776	0.727	6.53	0.066	1.23	0.0015	3.28	0.0041	17.5	0.27	43.6	14	7.72	3.09	85.7	0	76.79	1.32927
E9AG68-F1	AF-E9AG68-F1-model_v1	ALPHAFOLD V2.0 PREDICTION FOR 60S_RIBOSOMAL_PROTEIN_L23A_-_PUTATIVE (E9AG68)	MOL_ID: 1; ORGANISM_SCIENTIFIC: LEISHMANIA INFANTUM; ORGANISM_TAXID: 5671	01-JUL-21	12-OCT-21	n/a	16379.7	0.752	6.53	0.066	1.09	0.0014	3.28	0.0043	19.7	0.31	43.6	16.54	5.27	4	21.5	14.6	87.38	1.32927
A0A1D6LHT0-F1	AF-A0A1D6LHT0-F1-model_v1	ALPHAFOLD V2.0 PREDICTION FOR UNCHARACTERIZED PROTEIN (A0A1D6LHT0)	MOL_ID: 1; ORGANISM_SCIENTIFIC: ZEA MAYS; ORGANISM_TAXID: 4577	01-JUL-21	12-OCT-21	n/a	6403.6	0.714	9.26	0.093	0.699	0.00095	2.31	0.0032	18.1	0.29	30.7	12.68	2.55	1.78	59	0	58.48	1.329
Q2WEN9-F1	AF-Q2WEN9-F1-model_v1	ALPHAFOLD V2.0 PREDICTION FOR CARCINOEMBRYONIC ANTIGEN-RELATED CELL ADHESION MOLECULE 16 (Q2WEN9)	MOL_ID: 1; ORGANISM_SCIENTIFIC: HOMO SAPIENS; ORGANISM_TAXID: 9606	01-JUL-21	12-OCT-21	1-20	43762	0.736	5.68	0.057	2.71	0.0034	3.77	0.0047	10.3	0.16	50.1	17.49	6.12	3.5	4.2	38.1	93.36	1.32891
A0A0P0WDE4-F1	AF-A0A0P0WDE4-F1-model_v1	ALPHAFOLD V2.0 PREDICTION FOR OS04G0547833 PROTEIN (A0A0P0WDE4)	MOL_ID: 1; ORGANISM_SCIENTIFIC: ORYZA SATIVA SUBSP. JAPONICA; ORGANISM_TAXID: 39947	01-JUL-21	12-OCT-21	n/a	8662.9	0.721	7.19	0.072	0.717	0.0009	2.98	0.0037	25.4	0.4	39.6	12.55	8.08	3.26	4.9	0	60.75	1.32886
H0WF11-F1	AF-H0WF11-F1-model_v1	ALPHAFOLD V2.0 PREDICTION FOR SI:DKEYP-100H4.2 (H0WF11)	MOL_ID: 1; ORGANISM_SCIENTIFIC: DANIO RERIO; ORGANISM_TAXID: 7955	01-JUL-21	12-OCT-21	n/a	8686	0.708	7.35	0.074	0.768	0.00098	2.92	0.0037	24.1	0.38	38.8	13.55	6.19	2.49	13	0	72.96	1.32877
C6T310-F1	AF-C6T310-F1-model_v1	ALPHAFOLD V2.0 PREDICTION FOR UNCHARACTERIZED PROTEIN (C6T310)	MOL_ID: 1; ORGANISM_SCIENTIFIC: GLYCINE MAX; ORGANISM_TAXID: 3847	01-JUL-21	12-OCT-21	n/a	7967.2	0.737	7.82	0.079	0.676	0.00086	2.74	0.0035	22	0.35	36.4	11.88	5.67	4.29	4.2	0	73.65	1.32847
Q54G31-F1	AF-Q54G31-F1-model_v1	ALPHAFOLD V2.0 PREDICTION FOR UNCHARACTERIZED PROTEIN (Q54G31)	MOL_ID: 1; ORGANISM_SCIENTIFIC: DICTYOSTELIUM DISCOIDEUM; ORGANISM_TAXID: 44689	01-JUL-21	12-OCT-21	n/a	80226.4	0.737	4.54	0.046	3.95	0.005	4.72	0.0059	11.1	0.17	62.7	22.41	5.83	4.66	51.4	10.8	94.18	1.32839
A4IA57-F1	AF-A4IA57-F1-model_v1	ALPHAFOLD V2.0 PREDICTION FOR PUTATIVE TUZIN (A4IA57)	MOL_ID: 1; ORGANISM_SCIENTIFIC: LEISHMANIA INFANTUM; ORGANISM_TAXID: 5671	01-JUL-21	12-OCT-21	n/a	62322.3	0.735	4.57	0.046	3.11	0.0039	4.69	0.0058	14.1	0.22	62.3	19.72	8.41	6.25	45.9	12	83.79	1.32836
E9QIM4-F1	AF-E9QIM4-F1-model_v1	ALPHAFOLD V2.0 PREDICTION FOR SI:DKEYP-86F7.4 (E9QIM4)	MOL_ID: 1; ORGANISM_SCIENTIFIC: DANIO RERIO; ORGANISM_TAXID: 7955	01-JUL-21	12-OCT-21	n/a	35655.2	0.736	5.8	0.058	2.25	0.0028	3.69	0.0045	11.4	0.18	49	15.74	5.51	4.88	35.5	16	85.84	1.32791
Q10HT0-F1	AF-Q10HT0-F1-model_v1	ALPHAFOLD V2.0 PREDICTION FOR NUF2 FAMILY PROTEIN, EXPRESSED (Q10HT0)	MOL_ID: 1; ORGANISM_SCIENTIFIC: ORYZA SATIVA SUBSP. JAPONICA; ORGANISM_TAXID: 39947	01-JUL-21	12-OCT-21	n/a	54484.6	0.741	3.75	0.038	2.18	0.003	5.71	0.0078	31.4	0.5	75.8	30.27	8.35	5.99	79.6	0	83.56	1.3275
A8E5C6-F1	AF-A8E5C6-F1-model_v1	ALPHAFOLD V2.0 PREDICTION FOR TRANSMEMBRANE PROTEIN 199 (A8E5C6)	MOL_ID: 1; ORGANISM_SCIENTIFIC: DANIO RERIO; ORGANISM_TAXID: 7955	01-JUL-21	12-OCT-21	n/a	22007.4	0.749	6.54	0.066	1.49	0.0018	3.27	0.0039	12.7	0.2	43.4	14.23	6.72	4.81	70.1	3.1	80.48	1.32722
A0A0R0G6Q3-F1	AF-A0A0R0G6Q3-F1-model_v1	ALPHAFOLD V2.0 PREDICTION FOR UNCHARACTERIZED PROTEIN (A0A0R0G6Q3)	MOL_ID: 1; ORGANISM_SCIENTIFIC: GLYCINE MAX; ORGANISM_TAXID: 3847	01-JUL-21	12-OCT-21	n/a	9938.2	0.748	8.45	0.085	0.873	0.0011	2.54	0.0033	14.2	0.22	33.7	11.75	4.08	2.57	89.4	0	73.25	1.32677
A0A1D6HUW3-F1	AF-A0A1D6HUW3-F1-model_v1	ALPHAFOLD V2.0 PREDICTION FOR CYSTM DOMAIN-CONTAINING PROTEIN (A0A1D6HUW3)	MOL_ID: 1; ORGANISM_SCIENTIFIC: ZEA MAYS; ORGANISM_TAXID: 4577	01-JUL-21	12-OCT-21	n/a	8492.8	0.718	8.43	0.085	0.832	0.00099	2.54	0.003	15.2	0.24	33.7	10.89	4.98	2.79	16.9	0	58.5	1.32677
D3ZK59-F1	AF-D3ZK59-F1-model_v1	ALPHAFOLD V2.0 PREDICTION FOR KERATIN-ASSOCIATED PROTEIN 13-2 (D3ZK59)	MOL_ID: 1; ORGANISM_SCIENTIFIC: RATTUS NORVEGICUS; ORGANISM_TAXID: 10116	01-JUL-21	12-OCT-21	n/a	18349.5	0.704	4.69	0.047	1.05	0.0013	4.56	0.0054	39.7	0.62	60.5	17.71	8.74	5.43	0	0	45.5	1.32675
Q6NMI3-F1	AF-Q6NMI3-F1-model_v1	ALPHAFOLD V2.0 PREDICTION FOR CONSERVED OLIGOMERIC GOLGI COMPLEX SUBUNIT 6 (Q6NMI3)	MOL_ID: 1; ORGANISM_SCIENTIFIC: ARABIDOPSIS THALIANA; ORGANISM_TAXID: 3702	01-JUL-21	12-OCT-21	n/a	75792.3	0.736	3.7	0.037	3.05	0.0044	5.79	0.0083	26	0.42	76.8	31.82	8.77	5.32	71.3	0	84.54	1.32642
A0A1B0GV96-F1	AF-A0A1B0GV96-F1-model_v1	ALPHAFOLD V2.0 PREDICTION FOR UNCHARACTERIZED PROTEIN (A0A1B0GV96)	MOL_ID: 1; ORGANISM_SCIENTIFIC: HOMO SAPIENS; ORGANISM_TAXID: 9606	01-JUL-21	12-OCT-21	n/a	5485.9	0.709	9.46	0.095	0.622	0.00083	2.27	0.003	19	0.3	30.1	11.34	3.99	2.67	21.6	0	60.88	1.32599
K7N072-F1	AF-K7N072-F1-model_v1	ALPHAFOLD V2.0 PREDICTION FOR UNCHARACTERIZED PROTEIN (K7N072)	MOL_ID: 1; ORGANISM_SCIENTIFIC: GLYCINE MAX; ORGANISM_TAXID: 3847	01-JUL-21	12-OCT-21	n/a	7684.4	0.735	8.81	0.089	0.739	0.00099	2.43	0.0033	17.5	0.28	32.2	12.37	3.6	2.18	69.1	0	83.21	1.3251
A0A1D6JWB5-F1	AF-A0A1D6JWB5-F1-model_v1	ALPHAFOLD V2.0 PREDICTION FOR L-TYPE LECTIN-DOMAIN CONTAINING RECEPTOR KINASE V.9 (A0A1D6JWB5)	MOL_ID: 1; ORGANISM_SCIENTIFIC: ZEA MAYS; ORGANISM_TAXID: 4577	01-JUL-21	12-OCT-21	1-18	61807.3	0.737	5.04	0.051	3.38	0.004	4.25	0.005	9.95	0.15	56.3	17.92	6.65	5.4	21.2	20.5	82.27	1.32471
Q9Y2D4-F1	AF-Q9Y2D4-F1-model_v1	ALPHAFOLD V2.0 PREDICTION FOR EXOCYST COMPLEX COMPONENT 6B (Q9Y2D4)	MOL_ID: 1; ORGANISM_SCIENTIFIC: HOMO SAPIENS; ORGANISM_TAXID: 9606	01-JUL-21	12-OCT-21	n/a	94207.3	0.738	3.48	0.035	3.54	0.0049	6.16	0.0085	23.6	0.38	81.6	33.54	9.73	6.17	72.8	0.5	80.51	1.32468
B3H6M9-F1	AF-B3H6M9-F1-model_v1	ALPHAFOLD V2.0 PREDICTION FOR UNCHARACTERIZED PROTEIN (B3H6M9)	MOL_ID: 1; ORGANISM_SCIENTIFIC: ARABIDOPSIS THALIANA; ORGANISM_TAXID: 3702	01-JUL-21	12-OCT-21	n/a	3380.7	0.722	11.6	0.12	0.449	0.00057	1.85	0.0024	16	0.25	24.5	8.7	2.72	2.07	0	0	76.8	1.32432
Q554F2-F1	AF-Q554F2-F1-model_v1	ALPHAFOLD V2.0 PREDICTION FOR UNCHARACTERIZED PROTEIN (Q554F2)	MOL_ID: 1; ORGANISM_SCIENTIFIC: DICTYOSTELIUM DISCOIDEUM; ORGANISM_TAXID: 44689	01-JUL-21	12-OCT-21	n/a	8283.7	0.763	10.1	0.1	0.815	0.0011	2.13	0.0028	10.3	0.16	28.2	10.39	1.98	1.95	96.8	0	94.26	1.32394
Q56VZ8-F1	AF-Q56VZ8-F1-model_v1	ALPHAFOLD V2.0 PREDICTION FOR UNCHARACTERIZED PROTEIN (Q56VZ8)	MOL_ID: 1; ORGANISM_SCIENTIFIC: CAENORHABDITIS ELEGANS; ORGANISM_TAXID: 6239	01-JUL-21	12-OCT-21	n/a	8165	0.74	8.89	0.09	0.778	0.001	2.41	0.0033	15.9	0.25	31.9	12.83	2.95	2.4	77.5	0	74.87	1.32365
Q9SAI8-F1	AF-Q9SAI8-F1-model_v1	ALPHAFOLD V2.0 PREDICTION FOR F23A5.5 (Q9SAI8)	MOL_ID: 1; ORGANISM_SCIENTIFIC: ARABIDOPSIS THALIANA; ORGANISM_TAXID: 3702	01-JUL-21	12-OCT-21	n/a	24619.4	0.737	4.85	0.049	1.3	0.0016	4.42	0.0053	28.3	0.44	58.5	19.17	6.24	6.74	51.2	0	67.3	1.32353
Q5SUE3-F1	AF-Q5SUE3-F1-model_v1	ALPHAFOLD V2.0 PREDICTION FOR COILED-COIL DOMAIN-CONTAINING 92B (Q5SUE3)	MOL_ID: 1; ORGANISM_SCIENTIFIC: MUS MUSCULUS; ORGANISM_TAXID: 10090	01-JUL-21	12-OCT-21	n/a	33375.3	0.722	4.25	0.043	1.63	0.0021	5.04	0.0066	32.1	0.51	66.7	25.06	9.23	6.4	53.4	0	74.02	1.32341
Q9UI72-F1	AF-Q9UI72-F1-model_v1	ALPHAFOLD V2.0 PREDICTION FOR PUTATIVE UNCHARACTERIZED PROTEIN PRO0255 (Q9UI72)	MOL_ID: 1; ORGANISM_SCIENTIFIC: HOMO SAPIENS; ORGANISM_TAXID: 9606	01-JUL-21	12-OCT-21	n/a	8255	0.714	9.12	0.092	0.887	0.0011	2.35	0.003	13.4	0.21	31.1	11.32	3.51	2.33	83.8	0	59.88	1.3234
O14669-F1	AF-O14669-F1-model_v1	ALPHAFOLD V2.0 PREDICTION FOR TRANSMEMBRANE GAMMA-CARBOXYGLUTAMIC ACID PROTEIN 2 (O14669)	MOL_ID: 1; ORGANISM_SCIENTIFIC: HOMO SAPIENS; ORGANISM_TAXID: 9606	01-JUL-21	12-OCT-21	1-23	19884.4	0.731	5.91	0.06	1.3	0.0016	3.62	0.0046	19.6	0.31	47.9	14.13	7.5	4.51	39.3	0	73.2	1.3232
Q8IYE0-F1	AF-Q8IYE0-F1-model_v1	ALPHAFOLD V2.0 PREDICTION FOR COILED-COIL DOMAIN-CONTAINING PROTEIN 146 (Q8IYE0)	MOL_ID: 1; ORGANISM_SCIENTIFIC: HOMO SAPIENS; ORGANISM_TAXID: 9606	01-JUL-21	12-OCT-21	n/a	112837	0.745	2.36	0.024	2.8	0.0038	9.07	0.012	56.8	0.9	120	44.88	21.82	9.68	83.5	0	78.46	1.32304
A0A0P0XMN2-F1	AF-A0A0P0XMN2-F1-model_v1	ALPHAFOLD V2.0 PREDICTION FOR OS09G0417300 PROTEIN (A0A0P0XMN2)	MOL_ID: 1; ORGANISM_SCIENTIFIC: ORYZA SATIVA SUBSP. JAPONICA; ORGANISM_TAXID: 39947	01-JUL-21	12-OCT-21	n/a	9661	0.717	7.6	0.077	0.856	0.0011	2.82	0.0036	20.8	0.33	37.3	13.38	4.99	3.41	58	0	59.67	1.3227
Q7T352-F1	AF-Q7T352-F1-model_v1	ALPHAFOLD V2.0 PREDICTION FOR TRANSMEMBRANE PROTEIN 263 (Q7T352)	MOL_ID: 1; ORGANISM_SCIENTIFIC: DANIO RERIO; ORGANISM_TAXID: 7955	01-JUL-21	12-OCT-21	n/a	11869.4	0.736	6.45	0.065	0.833	0.0011	3.32	0.0042	26.5	0.42	43.9	16.28	6.18	4.48	10.1	0	51.85	1.32229
X1WET7-F1	AF-X1WET7-F1-model_v1	ALPHAFOLD V2.0 PREDICTION FOR SI:CH211-66I15.4 (X1WET7)	MOL_ID: 1; ORGANISM_SCIENTIFIC: DANIO RERIO; ORGANISM_TAXID: 7955	01-JUL-21	12-OCT-21	n/a	22356.7	0.731	5.11	0.052	1.27	0.0016	4.19	0.0054	27.4	0.43	55.4	19.05	8.19	5.29	17.4	0	72.23	1.3222
I1NB24-F1	AF-I1NB24-F1-model_v1	ALPHAFOLD V2.0 PREDICTION FOR UNCHARACTERIZED PROTEIN (I1NB24)	MOL_ID: 1; ORGANISM_SCIENTIFIC: GLYCINE MAX; ORGANISM_TAXID: 3847	01-JUL-21	12-OCT-21	n/a	9384	0.741	8.03	0.081	0.805	0.001	2.67	0.0033	17	0.27	35.3	11.18	5.27	2.5	58.5	0	69.26	1.3221
P87117-F1	AF-P87117-F1-model_v1	ALPHAFOLD V2.0 PREDICTION FOR VACUOLAR PROTEIN SORTING-ASSOCIATED PROTEIN ATG6 (P87117)	MOL_ID: 1; ORGANISM_SCIENTIFIC: SCHIZOSACCHAROMYCES POMBE (STRAIN 972 / ATCC 24843); ORGANISM_TAXID: 284812	01-JUL-21	12-OCT-21	n/a	53941.9	0.732	4.37	0.044	2.6	0.0032	4.91	0.006	17.2	0.27	64.9	19.76	8.33	6.09	52.3	4.1	75.16	1.32179
Q6QI07-F1	AF-Q6QI07-F1-model_v1	ALPHAFOLD V2.0 PREDICTION FOR LRRGT00202 (Q6QI07)	MOL_ID: 1; ORGANISM_SCIENTIFIC: RATTUS NORVEGICUS; ORGANISM_TAXID: 10116	01-JUL-21	12-OCT-21	n/a	27260.1	0.712	4.66	0.047	1.51	0.0019	4.6	0.0057	29.6	0.47	60.8	21.33	6.06	5.49	50.9	0	74.51	1.32174
A0A1D8PC38-F1	AF-A0A1D8PC38-F1-model_v1	ALPHAFOLD V2.0 PREDICTION FOR CTA2P (A0A1D8PC38)	MOL_ID: 1; ORGANISM_SCIENTIFIC: CANDIDA ALBICANS (STRAIN SC5314 / ATCC MYA-2876); ORGANISM_TAXID: 237561	01-JUL-21	12-OCT-21	n/a	29193.4	0.728	5.03	0.051	1.65	0.0021	4.26	0.0053	21.6	0.34	56.3	19.92	5.62	5.63	63.8	0	70.97	1.3216
O35460-F1	AF-O35460-F1-model_v1	ALPHAFOLD V2.0 PREDICTION FOR ANGIOPOIETIN-1 (O35460)	MOL_ID: 1; ORGANISM_SCIENTIFIC: RATTUS NORVEGICUS; ORGANISM_TAXID: 10116	01-JUL-21	12-OCT-21	1-19	55387	0.725	3.99	0.04	2.5	0.0033	5.38	0.0071	25.5	0.4	71.1	27.35	7.46	6.32	44.2	10.1	85.15	1.32156
Q9UII2-F1	AF-Q9UII2-F1-model_v1	ALPHAFOLD V2.0 PREDICTION FOR ATPASE INHIBITOR, MITOCHONDRIAL (Q9UII2)	MOL_ID: 1; ORGANISM_SCIENTIFIC: HOMO SAPIENS; ORGANISM_TAXID: 9606	01-JUL-21	12-OCT-21	n/a	12255.2	0.727	6.9	0.07	0.952	0.0012	3.11	0.0039	20.6	0.32	41.1	13.97	6.2	2.68	56.2	0	78.69	1.32154
Q3U319-F1	AF-Q3U319-F1-model_v1	ALPHAFOLD V2.0 PREDICTION FOR E3 UBIQUITIN-PROTEIN LIGASE BRE1B (Q3U319)	MOL_ID: 1; ORGANISM_SCIENTIFIC: MUS MUSCULUS; ORGANISM_TAXID: 10090	01-JUL-21	12-OCT-21	n/a	113979	0.732	2.55	0.026	3.21	0.0043	8.4	0.011	45.5	0.72	111	43.51	12.44	10.14	70.8	0.6	72.32	1.32143
Q9H0Q3-F1	AF-Q9H0Q3-F1-model_v1	ALPHAFOLD V2.0 PREDICTION FOR FXYD DOMAIN-CONTAINING ION TRANSPORT REGULATOR 6 (Q9H0Q3)	MOL_ID: 1; ORGANISM_SCIENTIFIC: HOMO SAPIENS; ORGANISM_TAXID: 9606	01-JUL-21	12-OCT-21	1-18	8597.2	0.736	8.61	0.087	0.805	0.001	2.49	0.0032	15.7	0.25	32.9	11.55	4	3.01	55.3	0	69.71	1.32129
A0A0R0FIT7-F1	AF-A0A0R0FIT7-F1-model_v1	ALPHAFOLD V2.0 PREDICTION FOR UNCHARACTERIZED PROTEIN (A0A0R0FIT7)	MOL_ID: 1; ORGANISM_SCIENTIFIC: GLYCINE MAX; ORGANISM_TAXID: 3847	01-JUL-21	12-OCT-21	n/a	29021.7	0.733	4.85	0.049	1.55	0.002	4.42	0.0058	25.3	0.4	58.4	21.31	6.66	8.08	50.8	5.5	73.8	1.32127
A0A0P0WZE3-F1	AF-A0A0P0WZE3-F1-model_v1	ALPHAFOLD V2.0 PREDICTION FOR OS06G0627916 PROTEIN (A0A0P0WZE3)	MOL_ID: 1; ORGANISM_SCIENTIFIC: ORYZA SATIVA SUBSP. JAPONICA; ORGANISM_TAXID: 39947	01-JUL-21	12-OCT-21	n/a	7770.7	0.704	8.73	0.088	0.827	0.0011	2.46	0.0032	16.7	0.26	32.5	11.3	4.26	2.7	60.3	0	64.99	1.32114
Q9D806-F1	AF-Q9D806-F1-model_v1	ALPHAFOLD V2.0 PREDICTION FOR V-SET AND TRANSMEMBRANE DOMAIN-CONTAINING PROTEIN 5 (Q9D806)	MOL_ID: 1; ORGANISM_SCIENTIFIC: MUS MUSCULUS; ORGANISM_TAXID: 10090	01-JUL-21	12-OCT-21	1-27	19568.1	0.739	7.17	0.072	1.51	0.0019	2.99	0.0038	12.4	0.2	39.5	14.49	4.89	3.34	34.5	25.7	91.89	1.32107
Q969V4-F1	AF-Q969V4-F1-model_v1	ALPHAFOLD V2.0 PREDICTION FOR TEKTIN-1 (Q969V4)	MOL_ID: 1; ORGANISM_SCIENTIFIC: HOMO SAPIENS; ORGANISM_TAXID: 9606	01-JUL-21	12-OCT-21	n/a	48286.1	0.738	4.49	0.045	2.34	0.0032	4.77	0.0066	21.8	0.35	63	25.92	6.5	4.55	82.2	0	92.86	1.32075
Q8TBE3-F1	AF-Q8TBE3-F1-model_v1	ALPHAFOLD V2.0 PREDICTION FOR FIBRONECTIN TYPE III DOMAIN-CONTAINING PROTEIN 9 (Q8TBE3)	MOL_ID: 1; ORGANISM_SCIENTIFIC: HOMO SAPIENS; ORGANISM_TAXID: 9606	01-JUL-21	12-OCT-21	n/a	25266.4	0.731	5.41	0.055	1.52	0.0018	3.96	0.0048	20	0.31	52.3	17.66	6.21	4.63	15.7	17	67.4	1.32071
A0A0P0XL30-F1	AF-A0A0P0XL30-F1-model_v1	ALPHAFOLD V2.0 PREDICTION FOR OS09G0288900 PROTEIN (A0A0P0XL30)	MOL_ID: 1; ORGANISM_SCIENTIFIC: ORYZA SATIVA SUBSP. JAPONICA; ORGANISM_TAXID: 39947	01-JUL-21	12-OCT-21	n/a	10000.5	0.739	7.4	0.075	0.796	0.00099	2.9	0.0036	20.4	0.32	38.3	12.98	5.44	4.77	46.1	0	60.09	1.32069
Q54B06-F1	AF-Q54B06-F1-model_v1	ALPHAFOLD V2.0 PREDICTION FOR UNCHARACTERIZED PROTEIN (Q54B06)	MOL_ID: 1; ORGANISM_SCIENTIFIC: DICTYOSTELIUM DISCOIDEUM; ORGANISM_TAXID: 44689	01-JUL-21	12-OCT-21	n/a	6373.3	0.746	10.2	0.1	0.683	0.00086	2.09	0.0026	12.4	0.19	27.6	9.85	2.65	2.11	75.5	0	70.13	1.32057
A0A0G2K388-F1	AF-A0A0G2K388-F1-model_v1	ALPHAFOLD V2.0 PREDICTION FOR UNCHARACTERIZED PROTEIN (A0A0G2K388)	MOL_ID: 1; ORGANISM_SCIENTIFIC: RATTUS NORVEGICUS; ORGANISM_TAXID: 10116	01-JUL-21	12-OCT-21	n/a	11930.2	0.739	7	0.071	0.899	0.0012	3.06	0.0041	21.2	0.34	40.4	14.89	4.97	4.19	54.6	0	63.2	1.32026
F1QVM1-F1	AF-F1QVM1-F1-model_v1	ALPHAFOLD V2.0 PREDICTION FOR SI:CH211-250C4.5 (F1QVM1)	MOL_ID: 1; ORGANISM_SCIENTIFIC: DANIO RERIO; ORGANISM_TAXID: 7955	01-JUL-21	12-OCT-21	n/a	70728.3	0.733	3.2	0.032	2.49	0.0032	6.69	0.0087	36.8	0.58	88.3	33.42	9.72	7.18	74.3	0	72.7	1.31988
A0A0P0XE36-F1	AF-A0A0P0XE36-F1-model_v1	ALPHAFOLD V2.0 PREDICTION FOR OS08G0246700 PROTEIN (A0A0P0XE36)	MOL_ID: 1; ORGANISM_SCIENTIFIC: ORYZA SATIVA SUBSP. JAPONICA; ORGANISM_TAXID: 39947	01-JUL-21	12-OCT-21	n/a	9290.7	0.707	6.65	0.067	0.746	0.00094	3.22	0.004	30.4	0.48	42.5	14.52	7.4	3.73	3.4	0	55.64	1.31988
A0A1P8B0V4-F1	AF-A0A1P8B0V4-F1-model_v1	ALPHAFOLD V2.0 PREDICTION FOR UNCHARACTERIZED PROTEIN (A0A1P8B0V4)	MOL_ID: 1; ORGANISM_SCIENTIFIC: ARABIDOPSIS THALIANA; ORGANISM_TAXID: 3702	01-JUL-21	12-OCT-21	n/a	7708.4	0.748	9.67	0.097	0.775	0.001	2.22	0.0029	12.4	0.2	29.3	10.58	2.58	2.32	93.9	0	72.65	1.31982
O16363-F1	AF-O16363-F1-model_v1	ALPHAFOLD V2.0 PREDICTION FOR CX DOMAIN-CONTAINING PROTEIN (O16363)	MOL_ID: 1; ORGANISM_SCIENTIFIC: CAENORHABDITIS ELEGANS; ORGANISM_TAXID: 6239	01-JUL-21	12-OCT-21	1-22	24137.9	0.73	5.81	0.059	1.56	0.0021	3.69	0.005	20	0.32	48.7	18.7	4.71	3.72	34.7	13.4	72.55	1.31978
Q9UBK5-F1	AF-Q9UBK5-F1-model_v1	ALPHAFOLD V2.0 PREDICTION FOR HEMATOPOIETIC CELL SIGNAL TRANSDUCER (Q9UBK5)	MOL_ID: 1; ORGANISM_SCIENTIFIC: HOMO SAPIENS; ORGANISM_TAXID: 9606	01-JUL-21	12-OCT-21	1-18	7567.7	0.736	8.8	0.089	0.725	0.00092	2.44	0.0031	16.6	0.26	32.2	11.57	4.1	2.52	33.8	0	67.37	1.31967
Q6GVH0-F1	AF-Q6GVH0-F1-model_v1	ALPHAFOLD V2.0 PREDICTION FOR RNA-BINDING REGION CONTAINING PROTEIN 2 (Q6GVH0)	MOL_ID: 1; ORGANISM_SCIENTIFIC: RATTUS NORVEGICUS; ORGANISM_TAXID: 10116	01-JUL-21	12-OCT-21	n/a	7395.6	0.76	9.81	0.099	0.718	0.00094	2.19	0.0029	12.4	0.2	28.9	10.76	3.06	2.09	85.5	0	78.03	1.31963
D3ZIJ5-F1	AF-D3ZIJ5-F1-model_v1	ALPHAFOLD V2.0 PREDICTION FOR DOLICHOL-PHOSPHATE MANNOSYLTRANSFERASE SUBUNIT 3 (D3ZIJ5)	MOL_ID: 1; ORGANISM_SCIENTIFIC: RATTUS NORVEGICUS; ORGANISM_TAXID: 10116	01-JUL-21	12-OCT-21	1-19	7962.6	0.747	9.8	0.099	0.814	0.00099	2.19	0.0027	10.9	0.17	28.9	9.3	3.46	2.65	63.9	0	87.98	1.31963
K7M511-F1	AF-K7M511-F1-model_v1	ALPHAFOLD V2.0 PREDICTION FOR E3 UBIQUITIN PROTEIN LIGASE (K7M511)	MOL_ID: 1; ORGANISM_SCIENTIFIC: GLYCINE MAX; ORGANISM_TAXID: 3847	01-JUL-21	12-OCT-21	n/a	100462	0.733	2.6	0.026	2.87	0.004	8.26	0.011	50.2	0.8	109	44.25	17.69	9.25	81	0.7	77.37	1.31961
Q54C84-F1	AF-Q54C84-F1-model_v1	ALPHAFOLD V2.0 PREDICTION FOR UNCHARACTERIZED PROTEIN (Q54C84)	MOL_ID: 1; ORGANISM_SCIENTIFIC: DICTYOSTELIUM DISCOIDEUM; ORGANISM_TAXID: 44689	01-JUL-21	12-OCT-21	n/a	6858.4	0.71	8.88	0.09	0.727	0.00098	2.41	0.0033	18.9	0.3	31.8	13.01	3.85	2.21	28.6	0	59.88	1.3195
Q6ZMC9-F1	AF-Q6ZMC9-F1-model_v1	ALPHAFOLD V2.0 PREDICTION FOR SIALIC ACID-BINDING IG-LIKE LECTIN 15 (Q6ZMC9)	MOL_ID: 1; ORGANISM_SCIENTIFIC: HOMO SAPIENS; ORGANISM_TAXID: 9606	01-JUL-21	12-OCT-21	1-19	33559.5	0.727	4.96	0.05	1.88	0.0026	4.32	0.0059	23.4	0.37	57	21.68	5.69	6.45	11.4	27.9	80.8	1.31944
A0A5K1K8S1-F1	AF-A0A5K1K8S1-F1-model_v1	ALPHAFOLD V2.0 PREDICTION FOR UNCHARACTERIZED PROTEIN (A0A5K1K8S1)	MOL_ID: 1; ORGANISM_SCIENTIFIC: PLASMODIUM FALCIPARUM (ISOLATE 3D7); ORGANISM_TAXID: 36329	01-JUL-21	12-OCT-21	n/a	17842.8	0.757	6.92	0.07	1.24	0.0016	3.1	0.004	14.2	0.22	40.9	14.59	3.81	3.79	73.2	0	67.74	1.31935
C6T559-F1	AF-C6T559-F1-model_v1	ALPHAFOLD V2.0 PREDICTION FOR LEA_2 DOMAIN-CONTAINING PROTEIN (C6T559)	MOL_ID: 1; ORGANISM_SCIENTIFIC: GLYCINE MAX; ORGANISM_TAXID: 3847	01-JUL-21	12-OCT-21	n/a	24723.8	0.744	6	0.061	1.56	0.0022	3.57	0.005	18.8	0.3	47.1	19.97	3.75	3.55	24.9	34.7	81.37	1.31933
Q16585-F1	AF-Q16585-F1-model_v1	ALPHAFOLD V2.0 PREDICTION FOR BETA-SARCOGLYCAN (Q16585)	MOL_ID: 1; ORGANISM_SCIENTIFIC: HOMO SAPIENS; ORGANISM_TAXID: 9606	01-JUL-21	12-OCT-21	n/a	34785	0.734	4.75	0.048	1.81	0.0024	4.51	0.006	22.3	0.35	59.5	19.84	8.59	5.21	15.5	8.8	77.47	1.31929
Q12864-F1	AF-Q12864-F1-model_v1	ALPHAFOLD V2.0 PREDICTION FOR CADHERIN-17 (Q12864)	MOL_ID: 1; ORGANISM_SCIENTIFIC: HOMO SAPIENS; ORGANISM_TAXID: 9606	01-JUL-21	12-OCT-21	1-22	89753	0.737	3.62	0.036	3.53	0.0042	5.92	0.0071	18.8	0.29	78.1	24.17	12.73	8.5	5.7	32.5	88.52	1.31926
Q7L3B6-F1	AF-Q7L3B6-F1-model_v1	ALPHAFOLD V2.0 PREDICTION FOR HSP90 CO-CHAPERONE CDC37-LIKE 1 (Q7L3B6)	MOL_ID: 1; ORGANISM_SCIENTIFIC: HOMO SAPIENS; ORGANISM_TAXID: 9606	01-JUL-21	12-OCT-21	n/a	38827.5	0.726	4.53	0.046	1.99	0.0024	4.73	0.0057	22.7	0.35	62.4	21.37	6.67	7.55	58	0	71.07	1.31924
K7K9Y1-F1	AF-K7K9Y1-F1-model_v1	ALPHAFOLD V2.0 PREDICTION FOR UNCHARACTERIZED PROTEIN (K7K9Y1)	MOL_ID: 1; ORGANISM_SCIENTIFIC: GLYCINE MAX; ORGANISM_TAXID: 3847	01-JUL-21	12-OCT-21	n/a	8354.2	0.745	9.24	0.093	0.811	0.001	2.32	0.003	12.9	0.2	30.6	10.71	3.6	2.32	81.7	0	68.84	1.31897
A0A0P0VU25-F1	AF-A0A0P0VU25-F1-model_v1	ALPHAFOLD V2.0 PREDICTION FOR OS03G0189800 PROTEIN (A0A0P0VU25)	MOL_ID: 1; ORGANISM_SCIENTIFIC: ORYZA SATIVA SUBSP. JAPONICA; ORGANISM_TAXID: 39947	01-JUL-21	12-OCT-21	1-23	7751	0.724	8.53	0.086	0.752	0.00093	2.51	0.0031	17.2	0.27	33.1	11.6	4.19	2.77	19.5	0	42.61	1.31873
O07784-F1	AF-O07784-F1-model_v1	ALPHAFOLD V2.0 PREDICTION FOR MCE-FAMILY PROTEIN MCE2F (O07784)	MOL_ID: 1; ORGANISM_SCIENTIFIC: MYCOBACTERIUM TUBERCULOSIS (STRAIN ATCC 25618 / H37RV); ORGANISM_TAXID: 83332	01-JUL-21	12-OCT-21	n/a	54190.8	0.733	4.01	0.04	2.39	0.0032	5.34	0.0072	23.7	0.38	70.4	25.83	9.5	7.08	36.3	9.1	80.59	1.31835
B0UYR9-F1	AF-B0UYR9-F1-model_v1	ALPHAFOLD V2.0 PREDICTION FOR KERATIN 98 (B0UYR9)	MOL_ID: 1; ORGANISM_SCIENTIFIC: DANIO RERIO; ORGANISM_TAXID: 7955	01-JUL-21	12-OCT-21	n/a	44613.8	0.726	4.01	0.04	2.02	0.0026	5.34	0.0069	29	0.46	70.4	23.91	12.34	7.65	73.1	5.9	82.67	1.31835
A2A2V5-F1	AF-A2A2V5-F1-model_v1	ALPHAFOLD V2.0 PREDICTION FOR SERINE-RICH AND TRANSMEMBRANE DOMAIN-CONTAINING PROTEIN 1 (A2A2V5)	MOL_ID: 1; ORGANISM_SCIENTIFIC: HOMO SAPIENS; ORGANISM_TAXID: 9606	01-JUL-21	12-OCT-21	n/a	11454.6	0.735	6.9	0.07	0.863	0.0012	3.11	0.0043	23.6	0.38	41	15.35	4.76	4.82	36.8	0	63.11	1.31833
P0CW23-F1	AF-P0CW23-F1-model_v1	ALPHAFOLD V2.0 PREDICTION FOR A-KINASE ANCHOR PROTEIN INHIBITOR 1 (P0CW23)	MOL_ID: 1; ORGANISM_SCIENTIFIC: HOMO SAPIENS; ORGANISM_TAXID: 9606	01-JUL-21	12-OCT-21	n/a	7849.5	0.729	8.98	0.091	0.787	0.001	2.39	0.0032	15.7	0.25	31.5	11.94	2.83	2.31	64.7	0	75.75	1.31799
A0A0P0V5W5-F1	AF-A0A0P0V5W5-F1-model_v1	ALPHAFOLD V2.0 PREDICTION FOR OS01G0647200 PROTEIN (A0A0P0V5W5)	MOL_ID: 1; ORGANISM_SCIENTIFIC: ORYZA SATIVA SUBSP. JAPONICA; ORGANISM_TAXID: 39947	01-JUL-21	12-OCT-21	n/a	5468.6	0.702	9.87	0.1	0.663	0.00087	2.17	0.0029	16.2	0.26	28.6	10.28	3.2	3.08	0	0	55.14	1.31797
P0CK98-F1	AF-P0CK98-F1-model_v1	ALPHAFOLD V2.0 PREDICTION FOR COILED-COIL DOMAIN-CONTAINING PROTEIN 39 (P0CK98)	MOL_ID: 1; ORGANISM_SCIENTIFIC: DANIO RERIO; ORGANISM_TAXID: 7955	01-JUL-21	12-OCT-21	n/a	109013	0.734	2.64	0.027	3.15	0.0043	8.12	0.011	43.8	0.7	107	42.3	14.82	7.39	84.6	0	79.06	1.31773
A8MXK1-F1	AF-A8MXK1-F1-model_v1	ALPHAFOLD V2.0 PREDICTION FOR V-SET AND TRANSMEMBRANE DOMAIN-CONTAINING PROTEIN 5 (A8MXK1)	MOL_ID: 1; ORGANISM_SCIENTIFIC: HOMO SAPIENS; ORGANISM_TAXID: 9606	01-JUL-21	12-OCT-21	1-28	19379	0.741	7.17	0.072	1.48	0.0019	2.99	0.0039	12.4	0.2	39.4	14.45	4.67	3.46	33.9	26.3	91.98	1.31773
Q8WVF2-F1	AF-Q8WVF2-F1-model_v1	ALPHAFOLD V2.0 PREDICTION FOR UNIQUE CARTILAGE MATRIX-ASSOCIATED PROTEIN (Q8WVF2)	MOL_ID: 1; ORGANISM_SCIENTIFIC: HOMO SAPIENS; ORGANISM_TAXID: 9606	01-JUL-21	12-OCT-21	1-26	13678.7	0.706	7.17	0.072	1.19	0.0014	2.99	0.0036	16.2	0.25	39.4	12.93	6.32	2.89	64.9	0	79.91	1.31773
A0A368UHZ4-F1	AF-A0A368UHZ4-F1-model_v1	ALPHAFOLD V2.0 PREDICTION FOR UNCHARACTERIZED PROTEIN (A0A368UHZ4)	MOL_ID: 1; ORGANISM_SCIENTIFIC: GLYCINE MAX; ORGANISM_TAXID: 3847	01-JUL-21	12-OCT-21	n/a	18442.2	0.741	6.36	0.064	1.25	0.0017	3.37	0.0045	20.2	0.32	44.4	16.71	4.81	4.28	55.6	0	84.08	1.31751
C6T0X5-F1	AF-C6T0X5-F1-model_v1	ALPHAFOLD V2.0 PREDICTION FOR UNCHARACTERIZED PROTEIN (C6T0X5)	MOL_ID: 1; ORGANISM_SCIENTIFIC: GLYCINE MAX; ORGANISM_TAXID: 3847	01-JUL-21	12-OCT-21	n/a	8513.5	0.741	8.6	0.087	0.782	0.001	2.49	0.0033	16.9	0.27	32.8	12.58	4.59	2.17	75.7	0	77.73	1.31727
Q9VJ58-F1	AF-Q9VJ58-F1-model_v1	ALPHAFOLD V2.0 PREDICTION FOR FAS-ASSOCIATED FACTOR 2, ISOFORM A (Q9VJ58)	MOL_ID: 1; ORGANISM_SCIENTIFIC: DROSOPHILA MELANOGASTER; ORGANISM_TAXID: 7227	01-JUL-21	12-OCT-21	n/a	52958	0.731	4.96	0.05	2.91	0.0036	4.32	0.0053	12.8	0.2	56.9	20.34	7.43	4.9	51	12.1	81.36	1.31713
Q02040-F1	AF-Q02040-F1-model_v1	ALPHAFOLD V2.0 PREDICTION FOR A-KINASE ANCHOR PROTEIN 17A (Q02040)	MOL_ID: 1; ORGANISM_SCIENTIFIC: HOMO SAPIENS; ORGANISM_TAXID: 9606	01-JUL-21	12-OCT-21	n/a	80790.6	0.727	2.99	0.03	2.72	0.0035	7.16	0.0091	35.2	0.55	94.3	32.76	13.62	9.03	36.3	9.4	69.34	1.31704
A6NGU7-F1	AF-A6NGU7-F1-model_v1	ALPHAFOLD V2.0 PREDICTION FOR PUTATIVE UNCHARACTERIZED PROTEIN ENCODED BY LINC01546 (A6NGU7)	MOL_ID: 1; ORGANISM_SCIENTIFIC: HOMO SAPIENS; ORGANISM_TAXID: 9606	01-JUL-21	12-OCT-21	n/a	7233.7	0.728	8.83	0.089	0.716	0.00092	2.43	0.0031	17.3	0.27	32	11.65	3.92	2.71	44.3	0	58.09	1.31687
A0A0P0XQJ3-F1	AF-A0A0P0XQJ3-F1-model_v1	ALPHAFOLD V2.0 PREDICTION FOR OS09G0569780 PROTEIN (A0A0P0XQJ3)	MOL_ID: 1; ORGANISM_SCIENTIFIC: ORYZA SATIVA SUBSP. JAPONICA; ORGANISM_TAXID: 39947	01-JUL-21	12-OCT-21	n/a	8529.6	0.742	9.04	0.091	0.82	0.001	2.37	0.003	13.6	0.21	31.2	11.44	2.49	2.44	86.8	0	70.79	1.31646
D3NQA5-F1	AF-D3NQA5-F1-model_v1	ALPHAFOLD V2.0 PREDICTION FOR BK CHANNEL INTERACTING PROTEIN (D3NQA5)	MOL_ID: 1; ORGANISM_SCIENTIFIC: CAENORHABDITIS ELEGANS; ORGANISM_TAXID: 6239	01-JUL-21	12-OCT-21	n/a	7818.2	0.75	9.27	0.093	0.747	0.00097	2.31	0.003	14.1	0.22	30.4	11.73	2.98	2.57	75	0	68.12	1.31602
A0A1D6EBP1-F1	AF-A0A1D6EBP1-F1-model_v1	ALPHAFOLD V2.0 PREDICTION FOR UNCHARACTERIZED PROTEIN (A0A1D6EBP1)	MOL_ID: 1; ORGANISM_SCIENTIFIC: ZEA MAYS; ORGANISM_TAXID: 4577	01-JUL-21	12-OCT-21	n/a	10159.4	0.74	7.44	0.075	0.81	0.001	2.88	0.0036	20	0.31	37.9	13.67	5.52	3.05	52.2	0	60.25	1.31597
I1K9J0-F1	AF-I1K9J0-F1-model_v1	ALPHAFOLD V2.0 PREDICTION FOR UNCHARACTERIZED PROTEIN (I1K9J0)	MOL_ID: 1; ORGANISM_SCIENTIFIC: GLYCINE MAX; ORGANISM_TAXID: 3847	01-JUL-21	12-OCT-21	n/a	10441.2	0.732	7.6	0.077	0.877	0.0011	2.82	0.0034	17.7	0.28	37.1	11.68	5.9	3.78	10.3	8.2	72.96	1.3156
Q12033-F1	AF-Q12033-F1-model_v1	ALPHAFOLD V2.0 PREDICTION FOR PH-RESPONSE REGULATOR PROTEIN PALA/RIM20 (Q12033)	MOL_ID: 1; ORGANISM_SCIENTIFIC: SACCHAROMYCES CEREVISIAE (STRAIN ATCC 204508 / S288C); ORGANISM_TAXID: 559292	01-JUL-21	12-OCT-21	n/a	75952.2	0.74	4.38	0.044	3.57	0.0046	4.89	0.0063	13.2	0.21	64.3	23.17	8.88	5.03	70.5	1.5	89.52	1.31493
A0A1D6N0V7-F1	AF-A0A1D6N0V7-F1-model_v1	ALPHAFOLD V2.0 PREDICTION FOR P-LOOP CONTAINING NUCLEOSIDE TRIPHOSPHATE HYDROLASE SUPERFAMILY PROTEIN (A0A1D6N0V7)	MOL_ID: 1; ORGANISM_SCIENTIFIC: ZEA MAYS; ORGANISM_TAXID: 4577	01-JUL-21	12-OCT-21	n/a	50851.9	0.727	3.83	0.039	2.19	0.0029	5.59	0.0075	30	0.48	73.5	29.14	9.34	7.11	68.3	0	75.51	1.31485
Q9S7V0-F1	AF-Q9S7V0-F1-model_v1	ALPHAFOLD V2.0 PREDICTION FOR OS01G0254200 PROTEIN (Q9S7V0)	MOL_ID: 1; ORGANISM_SCIENTIFIC: ORYZA SATIVA SUBSP. JAPONICA; ORGANISM_TAXID: 39947	01-JUL-21	12-OCT-21	n/a	6614.8	0.76	9.92	0.1	0.65	0.00085	2.16	0.0028	13.4	0.21	28.4	10	2.95	2.3	65.6	0	76.81	1.31481
A0A0R0LDQ8-F1	AF-A0A0R0LDQ8-F1-model_v1	ALPHAFOLD V2.0 PREDICTION FOR UNCHARACTERIZED PROTEIN (A0A0R0LDQ8)	MOL_ID: 1; ORGANISM_SCIENTIFIC: GLYCINE MAX; ORGANISM_TAXID: 3847	01-JUL-21	12-OCT-21	n/a	8309.4	0.746	9.37	0.094	0.815	0.001	2.29	0.0029	12.7	0.2	30.1	11.13	2.37	2.2	95.6	0	71.03	1.31441
A0A1D6GQ47-F1	AF-A0A1D6GQ47-F1-model_v1	ALPHAFOLD V2.0 PREDICTION FOR UNCHARACTERIZED PROTEIN (A0A1D6GQ47)	MOL_ID: 1; ORGANISM_SCIENTIFIC: ZEA MAYS; ORGANISM_TAXID: 4577	01-JUL-21	12-OCT-21	n/a	9552	0.735	8.39	0.085	0.876	0.0011	2.55	0.0032	14.6	0.23	33.5	11.53	3.16	2.9	84.2	0	67.52	1.31373
K7M2Q9-F1	AF-K7M2Q9-F1-model_v1	ALPHAFOLD V2.0 PREDICTION FOR UNCHARACTERIZED PROTEIN (K7M2Q9)	MOL_ID: 1; ORGANISM_SCIENTIFIC: GLYCINE MAX; ORGANISM_TAXID: 3847	01-JUL-21	12-OCT-21	n/a	6010.2	0.766	10.5	0.11	0.61	0.00077	2.04	0.0026	12.2	0.19	26.8	9.41	2.76	2.04	54	0	80.23	1.31373
Q4CNL2-F1	AF-Q4CNL2-F1-model_v1	ALPHAFOLD V2.0 PREDICTION FOR SURFACE PROTEIN TOLT, PUTATIVE (Q4CNL2)	MOL_ID: 1; ORGANISM_SCIENTIFIC: TRYPANOSOMA CRUZI (STRAIN CL BRENER); ORGANISM_TAXID: 353153	01-JUL-21	12-OCT-21	n/a	21533.2	0.739	6.01	0.061	1.39	0.0018	3.57	0.0046	17.9	0.28	46.9	17.21	4.89	3.32	81.8	0	71.99	1.31373
A0A0R4ITD9-F1	AF-A0A0R4ITD9-F1-model_v1	ALPHAFOLD V2.0 PREDICTION FOR PROTOCADHERIN 11 (A0A0R4ITD9)	MOL_ID: 1; ORGANISM_SCIENTIFIC: DANIO RERIO; ORGANISM_TAXID: 7955	01-JUL-21	12-OCT-21	1-23	118265	0.735	2.87	0.029	3.71	0.0047	7.46	0.0095	28.4	0.45	98	34.82	13.6	11.12	6.5	25.3	72.86	1.31367
I1J9K6-F1	AF-I1J9K6-F1-model_v1	ALPHAFOLD V2.0 PREDICTION FOR UNCHARACTERIZED PROTEIN (I1J9K6)	MOL_ID: 1; ORGANISM_SCIENTIFIC: GLYCINE MAX; ORGANISM_TAXID: 3847	01-JUL-21	12-OCT-21	n/a	8139.9	0.725	8.51	0.086	0.785	0.00099	2.52	0.0032	16.6	0.26	33.1	10.78	5.26	2.78	44.4	0	73.24	1.31349
Q53M23-F1	AF-Q53M23-F1-model_v1	ALPHAFOLD V2.0 PREDICTION FOR EXPRESSED PROTEIN (Q53M23)	MOL_ID: 1; ORGANISM_SCIENTIFIC: ORYZA SATIVA SUBSP. JAPONICA; ORGANISM_TAXID: 39947	01-JUL-21	12-OCT-21	n/a	12619	0.726	6.71	0.068	0.957	0.0012	3.19	0.0041	21.8	0.34	41.9	13.87	6.23	4.33	34.9	0	53.27	1.31348
A0A0P0Y3S0-F1	AF-A0A0P0Y3S0-F1-model_v1	ALPHAFOLD V2.0 PREDICTION FOR OS11G0560366 PROTEIN (A0A0P0Y3S0)	MOL_ID: 1; ORGANISM_SCIENTIFIC: ORYZA SATIVA SUBSP. JAPONICA; ORGANISM_TAXID: 39947	01-JUL-21	12-OCT-21	n/a	11929.9	0.704	5.85	0.059	0.85	0.001	3.67	0.0044	33.2	0.52	48.2	15.56	9.53	4.87	8.1	0	52.43	1.31335
Q4D374-F1	AF-Q4D374-F1-model_v1	ALPHAFOLD V2.0 PREDICTION FOR TRANS-SIALIDASE, PUTATIVE (Q4D374)	MOL_ID: 1; ORGANISM_SCIENTIFIC: TRYPANOSOMA CRUZI (STRAIN CL BRENER); ORGANISM_TAXID: 353153	01-JUL-21	12-OCT-21	n/a	12911.9	0.723	6.45	0.065	0.95	0.0012	3.32	0.0042	24.3	0.38	43.6	15.55	5.99	4.42	17.2	16.4	69.3	1.31325
Q6NYG4-F1	AF-Q6NYG4-F1-model_v1	ALPHAFOLD V2.0 PREDICTION FOR CYSTEINE AND TYROSINE-RICH PROTEIN 1 (Q6NYG4)	MOL_ID: 1; ORGANISM_SCIENTIFIC: DANIO RERIO; ORGANISM_TAXID: 7955	01-JUL-21	12-OCT-21	1-31	13680.6	0.728	6.52	0.066	1	0.0012	3.29	0.0041	21	0.33	43.2	13.5	5.47	6.91	31.8	0	61.79	1.31307
A0A1D6KGJ6-F1	AF-A0A1D6KGJ6-F1-model_v1	ALPHAFOLD V2.0 PREDICTION FOR UNCHARACTERIZED PROTEIN (A0A1D6KGJ6)	MOL_ID: 1; ORGANISM_SCIENTIFIC: ZEA MAYS; ORGANISM_TAXID: 4577	01-JUL-21	12-OCT-21	n/a	10530	0.728	7.7	0.078	0.909	0.0012	2.78	0.0037	18.2	0.29	36.5	13.8	4.15	3.13	56.8	0	72.32	1.31295
A0A0P0XHH7-F1	AF-A0A0P0XHH7-F1-model_v1	ALPHAFOLD V2.0 PREDICTION FOR OS08G0491500 PROTEIN (A0A0P0XHH7)	MOL_ID: 1; ORGANISM_SCIENTIFIC: ORYZA SATIVA SUBSP. JAPONICA; ORGANISM_TAXID: 39947	01-JUL-21	12-OCT-21	n/a	12343.3	0.734	7.29	0.073	0.986	0.0012	2.94	0.0036	17.1	0.27	38.6	12.38	6.76	2.65	62.4	0	74.51	1.31293
Q3ZCQ3-F1	AF-Q3ZCQ3-F1-model_v1	ALPHAFOLD V2.0 PREDICTION FOR MEMBRANE PROTEIN FAM174B (Q3ZCQ3)	MOL_ID: 1; ORGANISM_SCIENTIFIC: HOMO SAPIENS; ORGANISM_TAXID: 9606	01-JUL-21	12-OCT-21	1-26	14353.3	0.733	5.73	0.058	0.905	0.0012	3.74	0.0049	31.3	0.5	49.1	16.75	7.86	3.04	34.1	0	64.09	1.31283
P61366-F1	AF-P61366-F1-model_v1	ALPHAFOLD V2.0 PREDICTION FOR OSTEOCRIN (P61366)	MOL_ID: 1; ORGANISM_SCIENTIFIC: HOMO SAPIENS; ORGANISM_TAXID: 9606	01-JUL-21	12-OCT-21	1-27	11728.6	0.734	6.63	0.067	0.852	0.001	3.23	0.0039	23.3	0.36	42.4	12.16	7.17	4.29	16.2	0	62.77	1.31269
A4I9A9-F1	AF-A4I9A9-F1-model_v1	ALPHAFOLD V2.0 PREDICTION FOR DNAJ FAMILY-LIKE PROTEIN (A4I9A9)	MOL_ID: 1; ORGANISM_SCIENTIFIC: LEISHMANIA INFANTUM; ORGANISM_TAXID: 5671	01-JUL-21	12-OCT-21	n/a	29103.3	0.72	4.96	0.05	1.67	0.0021	4.32	0.0054	23.4	0.37	56.7	19.18	7.67	5.88	64.5	0	76.46	1.3125
Q92629-F1	AF-Q92629-F1-model_v1	ALPHAFOLD V2.0 PREDICTION FOR DELTA-SARCOGLYCAN (Q92629)	MOL_ID: 1; ORGANISM_SCIENTIFIC: HOMO SAPIENS; ORGANISM_TAXID: 9606	01-JUL-21	12-OCT-21	n/a	32082	0.746	4.82	0.049	1.62	0.0022	4.45	0.0061	26.2	0.42	58.4	24.39	4.88	4.99	11.1	13.5	81.93	1.31236
A0A0G2KBB4-F1	AF-A0A0G2KBB4-F1-model_v1	ALPHAFOLD V2.0 PREDICTION FOR SAD1 AND UNC84 DOMAIN-CONTAINING 5 (A0A0G2KBB4)	MOL_ID: 1; ORGANISM_SCIENTIFIC: RATTUS NORVEGICUS; ORGANISM_TAXID: 10116	01-JUL-21	12-OCT-21	n/a	42357.5	0.738	4.43	0.045	2.03	0.0025	4.84	0.0059	21.8	0.34	63.5	20.68	9.9	6.75	33.7	13	77.34	1.31198
Q4DLA4-F1	AF-Q4DLA4-F1-model_v1	ALPHAFOLD V2.0 PREDICTION FOR UNCHARACTERIZED PROTEIN (Q4DLA4)	MOL_ID: 1; ORGANISM_SCIENTIFIC: TRYPANOSOMA CRUZI (STRAIN CL BRENER); ORGANISM_TAXID: 353153	01-JUL-21	12-OCT-21	n/a	14001.7	0.75	6.88	0.069	0.994	0.0013	3.11	0.0042	18.8	0.3	40.8	14.81	6.09	4.34	73	0	72.39	1.3119
K7V502-F1	AF-K7V502-F1-model_v1	ALPHAFOLD V2.0 PREDICTION FOR GOLGIN CANDIDATE 1 (K7V502)	MOL_ID: 1; ORGANISM_SCIENTIFIC: ZEA MAYS; ORGANISM_TAXID: 4577	01-JUL-21	12-OCT-21	n/a	78948.5	0.728	2.78	0.028	2.46	0.0032	7.7	0.0099	48.2	0.76	101	38.03	14.27	12.18	61.7	0	69.45	1.31169
Q810P0-F1	AF-Q810P0-F1-model_v1	ALPHAFOLD V2.0 PREDICTION FOR TEX13 FAMILY MEMBER C3 (Q810P0)	MOL_ID: 1; ORGANISM_SCIENTIFIC: MUS MUSCULUS; ORGANISM_TAXID: 10090	01-JUL-21	12-OCT-21	n/a	24641.9	0.733	5.61	0.057	1.52	0.0019	3.82	0.0047	18.3	0.29	50.1	17.44	5	5.34	58.7	0	77.61	1.31152
K7TZE4-F1	AF-K7TZE4-F1-model_v1	ALPHAFOLD V2.0 PREDICTION FOR UNCHARACTERIZED PROTEIN (K7TZE4)	MOL_ID: 1; ORGANISM_SCIENTIFIC: ZEA MAYS; ORGANISM_TAXID: 4577	01-JUL-21	12-OCT-21	n/a	22237.2	0.734	5.91	0.06	1.44	0.0018	3.63	0.0046	18.1	0.28	47.6	17.47	5.66	4.76	59	3.1	81.51	1.31129
Q61835-F1	AF-Q61835-F1-model_v1	ALPHAFOLD V2.0 PREDICTION FOR FXYD DOMAIN-CONTAINING ION TRANSPORT REGULATOR 3 (Q61835)	MOL_ID: 1; ORGANISM_SCIENTIFIC: MUS MUSCULUS; ORGANISM_TAXID: 10090	01-JUL-21	12-OCT-21	1-20	7453.1	0.735	8.89	0.09	0.724	0.00096	2.41	0.0032	16.1	0.25	31.6	11.06	3.77	3.17	37.3	0	68.45	1.3112
A4I043-F1	AF-A4I043-F1-model_v1	ALPHAFOLD V2.0 PREDICTION FOR HYPOTHETICAL_PROTEIN_-_CONSERVED (A4I043)	MOL_ID: 1; ORGANISM_SCIENTIFIC: LEISHMANIA INFANTUM; ORGANISM_TAXID: 5671	01-JUL-21	12-OCT-21	n/a	19986	0.734	6.05	0.061	1.33	0.0016	3.54	0.0044	17.9	0.28	46.4	14.6	5.66	5.51	51.2	0	71.63	1.31073
B3DFT8-F1	AF-B3DFT8-F1-model_v1	ALPHAFOLD V2.0 PREDICTION FOR CD83 ANTIGEN (B3DFT8)	MOL_ID: 1; ORGANISM_SCIENTIFIC: DANIO RERIO; ORGANISM_TAXID: 7955	01-JUL-21	12-OCT-21	1-17	21849.5	0.745	6.21	0.063	1.43	0.0017	3.45	0.0042	15.8	0.25	45.2	15.29	5	4.78	25.4	22.3	81.92	1.31014
Q19218-F1	AF-Q19218-F1-model_v1	ALPHAFOLD V2.0 PREDICTION FOR COL_CUTICLE_N DOMAIN-CONTAINING PROTEIN (Q19218)	MOL_ID: 1; ORGANISM_SCIENTIFIC: CAENORHABDITIS ELEGANS; ORGANISM_TAXID: 6239	01-JUL-21	12-OCT-21	n/a	28825.8	0.712	4.43	0.045	1.52	0.0022	4.84	0.0069	37.6	0.61	63.4	25.16	12.06	5.17	18.1	0	59.54	1.30992
Q8R143-F1	AF-Q8R143-F1-model_v1	ALPHAFOLD V2.0 PREDICTION FOR PITUITARY TUMOR-TRANSFORMING GENE 1 PROTEIN-INTERACTING PROTEIN (Q8R143)	MOL_ID: 1; ORGANISM_SCIENTIFIC: MUS MUSCULUS; ORGANISM_TAXID: 10090	01-JUL-21	12-OCT-21	1-29	17056.4	0.725	6.92	0.07	1.34	0.0016	3.1	0.0037	14.2	0.22	40.6	12.14	6.82	3.73	50	4.2	82.76	1.30968
Q0DUF6-F1	AF-Q0DUF6-F1-model_v1	ALPHAFOLD V2.0 PREDICTION FOR OS03G0188500 PROTEIN (Q0DUF6)	MOL_ID: 1; ORGANISM_SCIENTIFIC: ORYZA SATIVA SUBSP. JAPONICA; ORGANISM_TAXID: 39947	01-JUL-21	12-OCT-21	n/a	11413.8	0.745	6.92	0.07	0.83	0.001	3.1	0.0038	20.3	0.32	40.6	12.82	6.24	3.73	31.7	0	65.65	1.30968
A0A0R0K5I8-F1	AF-A0A0R0K5I8-F1-model_v1	ALPHAFOLD V2.0 PREDICTION FOR UNCHARACTERIZED PROTEIN (A0A0R0K5I8)	MOL_ID: 1; ORGANISM_SCIENTIFIC: GLYCINE MAX; ORGANISM_TAXID: 3847	01-JUL-21	12-OCT-21	n/a	8747.8	0.744	8.97	0.09	0.828	0.0011	2.39	0.003	13.4	0.21	31.3	10.9	4.43	2.54	74.4	0	74.1	1.30962
Q9GP92-F1	AF-Q9GP92-F1-model_v1	ALPHAFOLD V2.0 PREDICTION FOR UNCHARACTERIZED PROTEIN (Q9GP92)	MOL_ID: 1; ORGANISM_SCIENTIFIC: CAENORHABDITIS ELEGANS; ORGANISM_TAXID: 6239	01-JUL-21	12-OCT-21	n/a	8860.7	0.724	9.07	0.091	0.914	0.0012	2.36	0.0031	12.9	0.2	30.9	11.69	2.47	2.15	95.8	0	82.45	1.30932
Q0JDK2-F1	AF-Q0JDK2-F1-model_v1	ALPHAFOLD V2.0 PREDICTION FOR OS04G0398400 PROTEIN (Q0JDK2)	MOL_ID: 1; ORGANISM_SCIENTIFIC: ORYZA SATIVA SUBSP. JAPONICA; ORGANISM_TAXID: 39947	01-JUL-21	12-OCT-21	n/a	7811.9	0.724	7.79	0.079	0.693	0.00087	2.75	0.0035	22.3	0.35	36	12.22	5.97	5.03	19	0	53.41	1.30909
Q6P5L3-F1	AF-Q6P5L3-F1-model_v1	ALPHAFOLD V2.0 PREDICTION FOR 60S RIBOSOMAL PROTEIN L19 (Q6P5L3)	MOL_ID: 1; ORGANISM_SCIENTIFIC: DANIO RERIO; ORGANISM_TAXID: 7955	01-JUL-21	12-OCT-21	n/a	23502.7	0.743	6.01	0.061	1.5	0.0019	3.56	0.0045	16.5	0.26	46.6	16.91	5.97	4.07	65.6	2	95.1	1.30899
Q6AT70-F1	AF-Q6AT70-F1-model_v1	ALPHAFOLD V2.0 PREDICTION FOR OS05G0417300 PROTEIN (Q6AT70)	MOL_ID: 1; ORGANISM_SCIENTIFIC: ORYZA SATIVA SUBSP. JAPONICA; ORGANISM_TAXID: 39947	01-JUL-21	12-OCT-21	n/a	28298.4	0.733	5.69	0.057	1.77	0.0022	3.76	0.0047	15	0.23	49.2	14.25	7.88	5.28	47.3	10	78.72	1.30851
E7EM28-F1	AF-E7EM28-F1-model_v1	ALPHAFOLD V2.0 PREDICTION FOR UNCHARACTERIZED PROTEIN (E7EM28)	MOL_ID: 1; ORGANISM_SCIENTIFIC: CAENORHABDITIS ELEGANS; ORGANISM_TAXID: 6239	01-JUL-21	12-OCT-21	n/a	4576.9	0.733	10.7	0.11	0.538	0.00068	2.01	0.0026	15.3	0.24	26.3	9.92	3.09	1.96	15.8	0	77.44	1.30846
Q54PF5-F1	AF-Q54PF5-F1-model_v1	ALPHAFOLD V2.0 PREDICTION FOR UNCHARACTERIZED PROTEIN (Q54PF5)	MOL_ID: 1; ORGANISM_SCIENTIFIC: DICTYOSTELIUM DISCOIDEUM; ORGANISM_TAXID: 44689	01-JUL-21	12-OCT-21	n/a	8277.6	0.779	10	0.1	0.757	0.00095	2.14	0.0027	10.2	0.16	28	10.4	2.24	2.01	96.8	0	95.78	1.30841
Q96MW5-F1	AF-Q96MW5-F1-model_v1	ALPHAFOLD V2.0 PREDICTION FOR CONSERVED OLIGOMERIC GOLGI COMPLEX SUBUNIT 8 (Q96MW5)	MOL_ID: 1; ORGANISM_SCIENTIFIC: HOMO SAPIENS; ORGANISM_TAXID: 9606	01-JUL-21	12-OCT-21	n/a	68416.6	0.741	3.91	0.039	2.86	0.0037	5.48	0.0071	20.8	0.33	71.7	25.47	9.01	6.06	64.7	0	79.15	1.30839
M0R828-F1	AF-M0R828-F1-model_v1	ALPHAFOLD V2.0 PREDICTION FOR UNCHARACTERIZED PROTEIN (M0R828)	MOL_ID: 1; ORGANISM_SCIENTIFIC: RATTUS NORVEGICUS; ORGANISM_TAXID: 10116	01-JUL-21	12-OCT-21	n/a	24147.3	0.736	5.04	0.051	1.32	0.0017	4.25	0.0053	26	0.41	55.6	17.59	8.34	8.38	33.8	0	78.03	1.30824
Q8N7H1-F1	AF-Q8N7H1-F1-model_v1	ALPHAFOLD V2.0 PREDICTION FOR PUTATIVE UNCHARACTERIZED PROTEIN ENCODED BY LINC01465 (Q8N7H1)	MOL_ID: 1; ORGANISM_SCIENTIFIC: HOMO SAPIENS; ORGANISM_TAXID: 9606	01-JUL-21	12-OCT-21	n/a	13448.7	0.728	6	0.06	0.904	0.0012	3.57	0.0046	27.5	0.43	46.7	15.38	6.32	3.53	6.9	0	61.61	1.30812
A0A0R0KHH4-F1	AF-A0A0R0KHH4-F1-model_v1	ALPHAFOLD V2.0 PREDICTION FOR UNCHARACTERIZED PROTEIN (A0A0R0KHH4)	MOL_ID: 1; ORGANISM_SCIENTIFIC: GLYCINE MAX; ORGANISM_TAXID: 3847	01-JUL-21	12-OCT-21	1-21	7532	0.76	9.57	0.096	0.714	0.00092	2.24	0.0029	13	0.21	29.3	10.9	3.79	2.31	51.5	0	59.13	1.30804
O04533-F1	AF-O04533-F1-model_v1	ALPHAFOLD V2.0 PREDICTION FOR PUTATIVE L-TYPE LECTIN-DOMAIN CONTAINING RECEPTOR KINASE V.2 (O04533)	MOL_ID: 1; ORGANISM_SCIENTIFIC: ARABIDOPSIS THALIANA; ORGANISM_TAXID: 3702	01-JUL-21	12-OCT-21	1-23	69755	0.742	4.71	0.047	3.5	0.0042	4.55	0.0054	10.8	0.17	59.5	18.13	7.16	6.67	25.2	19.8	81.37	1.30769
Q4DTQ6-F1	AF-Q4DTQ6-F1-model_v1	ALPHAFOLD V2.0 PREDICTION FOR DYNEIN ARM LIGHT CHAIN, PUTATIVE (Q4DTQ6)	MOL_ID: 1; ORGANISM_SCIENTIFIC: TRYPANOSOMA CRUZI (STRAIN CL BRENER); ORGANISM_TAXID: 353153	01-JUL-21	12-OCT-21	n/a	31927.6	0.74	5.19	0.052	1.78	0.0023	4.13	0.0054	19.5	0.31	54	20.39	7.59	5.01	62.1	2.1	86.75	1.30751
O75150-F1	AF-O75150-F1-model_v1	ALPHAFOLD V2.0 PREDICTION FOR E3 UBIQUITIN-PROTEIN LIGASE BRE1B (O75150)	MOL_ID: 1; ORGANISM_SCIENTIFIC: HOMO SAPIENS; ORGANISM_TAXID: 9606	01-JUL-21	12-OCT-21	n/a	113687	0.731	2.52	0.025	3.18	0.0044	8.49	0.012	47	0.75	111	43.95	11.68	12.18	71	0.4	72.44	1.30742
Q69TX5-F1	AF-Q69TX5-F1-model_v1	ALPHAFOLD V2.0 PREDICTION FOR OS06G0210400 PROTEIN (Q69TX5)	MOL_ID: 1; ORGANISM_SCIENTIFIC: ORYZA SATIVA SUBSP. JAPONICA; ORGANISM_TAXID: 39947	01-JUL-21	12-OCT-21	n/a	75457.9	0.736	4.54	0.046	3.73	0.0043	4.72	0.0055	10.8	0.17	61.7	19.34	7.67	6.27	26.1	16.5	80.69	1.3072
A0A0P0XK10-F1	AF-A0A0P0XK10-F1-model_v1	ALPHAFOLD V2.0 PREDICTION FOR OS09G0317001 PROTEIN (A0A0P0XK10)	MOL_ID: 1; ORGANISM_SCIENTIFIC: ORYZA SATIVA SUBSP. JAPONICA; ORGANISM_TAXID: 39947	01-JUL-21	12-OCT-21	n/a	9988	0.743	8.11	0.082	0.859	0.0011	2.64	0.0034	16.4	0.26	34.5	13.12	4.11	3.01	60.2	0	66.34	1.30682
A0A0P0XAZ6-F1	AF-A0A0P0XAZ6-F1-model_v1	ALPHAFOLD V2.0 PREDICTION FOR OS08G0114125 PROTEIN (A0A0P0XAZ6)	MOL_ID: 1; ORGANISM_SCIENTIFIC: ORYZA SATIVA SUBSP. JAPONICA; ORGANISM_TAXID: 39947	01-JUL-21	12-OCT-21	n/a	4477	0.764	11.5	0.12	0.502	0.00063	1.86	0.0023	12.3	0.19	24.3	8.91	2.4	2.11	47.5	0	74.46	1.30645
A0A1D6Q393-F1	AF-A0A1D6Q393-F1-model_v1	ALPHAFOLD V2.0 PREDICTION FOR UNCHARACTERIZED PROTEIN (A0A1D6Q393)	MOL_ID: 1; ORGANISM_SCIENTIFIC: ZEA MAYS; ORGANISM_TAXID: 4577	01-JUL-21	12-OCT-21	n/a	17037.9	0.72	5.8	0.058	1.14	0.0014	3.69	0.0045	23.8	0.37	48.2	15.54	7.8	4.5	40.3	0	71.1	1.30623
Q99JS0-F1	AF-Q99JS0-F1-model_v1	ALPHAFOLD V2.0 PREDICTION FOR NONCOMPACT MYELIN-ASSOCIATED PROTEIN (Q99JS0)	MOL_ID: 1; ORGANISM_SCIENTIFIC: MUS MUSCULUS; ORGANISM_TAXID: 10090	01-JUL-21	12-OCT-21	n/a	10850.6	0.748	7.3	0.074	0.823	0.0011	2.94	0.0039	20	0.32	38.4	13.71	5.27	4.15	53.5	0	65.79	1.30612
B6TQA2-F1	AF-B6TQA2-F1-model_v1	ALPHAFOLD V2.0 PREDICTION FOR GRIP AND COILED-COIL DOMAIN-CONTAINING PROTEIN 1 (B6TQA2)	MOL_ID: 1; ORGANISM_SCIENTIFIC: ZEA MAYS; ORGANISM_TAXID: 4577	01-JUL-21	12-OCT-21	n/a	8909.7	0.746	8.39	0.085	0.783	0.001	2.55	0.0033	17.2	0.27	33.3	12.64	3.5	2.43	62.2	0	71.85	1.30588
Q4V7C8-F1	AF-Q4V7C8-F1-model_v1	ALPHAFOLD V2.0 PREDICTION FOR CENTROSOMAL PROTEIN OF 55 KDA (Q4V7C8)	MOL_ID: 1; ORGANISM_SCIENTIFIC: RATTUS NORVEGICUS; ORGANISM_TAXID: 10116	01-JUL-21	12-OCT-21	n/a	54007.3	0.736	3.72	0.038	2.19	0.0028	5.76	0.0073	29.6	0.47	75.2	28.64	9.23	6.27	80.9	0.9	81.03	1.30556
O76011-F1	AF-O76011-F1-model_v1	ALPHAFOLD V2.0 PREDICTION FOR KERATIN, TYPE I CUTICULAR HA4 (O76011)	MOL_ID: 1; ORGANISM_SCIENTIFIC: HOMO SAPIENS; ORGANISM_TAXID: 9606	01-JUL-21	12-OCT-21	n/a	49414.6	0.726	3.99	0.04	2.23	0.0028	5.37	0.0067	25.5	0.4	70.1	25.01	8.66	5.8	68.3	0	76.21	1.3054
Q54VH3-F1	AF-Q54VH3-F1-model_v1	ALPHAFOLD V2.0 PREDICTION FOR UNCHARACTERIZED PROTEIN (Q54VH3)	MOL_ID: 1; ORGANISM_SCIENTIFIC: DICTYOSTELIUM DISCOIDEUM; ORGANISM_TAXID: 44689	01-JUL-21	12-OCT-21	n/a	126551	0.724	2.37	0.024	3.41	0.0045	9.04	0.012	51.2	0.81	118	45.88	11.35	13.08	63	0	62.31	1.30531
Q8R034-F1	AF-Q8R034-F1-model_v1	ALPHAFOLD V2.0 PREDICTION FOR ANAPHASE-PROMOTING COMPLEX SUBUNIT 13 (Q8R034)	MOL_ID: 1; ORGANISM_SCIENTIFIC: MUS MUSCULUS; ORGANISM_TAXID: 10090	01-JUL-21	12-OCT-21	n/a	8334.4	0.722	8.6	0.087	0.821	0.0011	2.49	0.0032	15.9	0.25	32.5	11.73	3.56	3.09	27.4	0	85.01	1.30522
K7MS21-F1	AF-K7MS21-F1-model_v1	ALPHAFOLD V2.0 PREDICTION FOR UNCHARACTERIZED PROTEIN (K7MS21)	MOL_ID: 1; ORGANISM_SCIENTIFIC: GLYCINE MAX; ORGANISM_TAXID: 3847	01-JUL-21	12-OCT-21	n/a	7151.8	0.742	10.1	0.1	0.767	0.001	2.13	0.0028	11.7	0.18	27.8	10.3	2.85	2.07	78.3	0	74.91	1.30516
Q6A162-F1	AF-Q6A162-F1-model_v1	ALPHAFOLD V2.0 PREDICTION FOR KERATIN, TYPE I CYTOSKELETAL 40 (Q6A162)	MOL_ID: 1; ORGANISM_SCIENTIFIC: HOMO SAPIENS; ORGANISM_TAXID: 9606	01-JUL-21	12-OCT-21	n/a	48105.6	0.722	3.94	0.04	2.17	0.0027	5.44	0.0068	27.3	0.43	71	25.95	8.7	6.8	67.4	0	75.27	1.30515
Q5Z9Q4-F1	AF-Q5Z9Q4-F1-model_v1	ALPHAFOLD V2.0 PREDICTION FOR OS06G0714850 PROTEIN (Q5Z9Q4)	MOL_ID: 1; ORGANISM_SCIENTIFIC: ORYZA SATIVA SUBSP. JAPONICA; ORGANISM_TAXID: 39947	01-JUL-21	12-OCT-21	n/a	7312.4	0.724	9.07	0.091	0.754	0.00098	2.36	0.0031	16.3	0.26	30.8	11.73	3	2.33	65.2	0	68.59	1.30508
Q9P2B2-F1	AF-Q9P2B2-F1-model_v1	ALPHAFOLD V2.0 PREDICTION FOR PROSTAGLANDIN F2 RECEPTOR NEGATIVE REGULATOR (Q9P2B2)	MOL_ID: 1; ORGANISM_SCIENTIFIC: HOMO SAPIENS; ORGANISM_TAXID: 9606	01-JUL-21	12-OCT-21	1-25	95831.4	0.73	3.57	0.036	3.81	0.0048	6	0.0076	18.5	0.29	78.3	22.91	14.68	5.95	8.2	42.8	84.98	1.305
A4HTV9-F1	AF-A4HTV9-F1-model_v1	ALPHAFOLD V2.0 PREDICTION FOR HYPOTHETICAL_PROTEIN_-__CONSERVED (A4HTV9)	MOL_ID: 1; ORGANISM_SCIENTIFIC: LEISHMANIA INFANTUM; ORGANISM_TAXID: 5671	01-JUL-21	12-OCT-21	n/a	100341	0.722	2.85	0.029	3.28	0.0042	7.51	0.0095	34.6	0.54	98	36.26	12.11	8.52	64.3	0	65.43	1.30493
D3DTV9-F1	AF-D3DTV9-F1-model_v1	ALPHAFOLD V2.0 PREDICTION FOR PUTATIVE PROTEIN PRAC2 (D3DTV9)	MOL_ID: 1; ORGANISM_SCIENTIFIC: HOMO SAPIENS; ORGANISM_TAXID: 9606	01-JUL-21	12-OCT-21	n/a	10441.2	0.739	7.03	0.071	0.79	0.001	3.05	0.0039	23.1	0.36	39.8	13.61	5.91	3.64	25.8	0	60.42	1.30492
Q65X87-F1	AF-Q65X87-F1-model_v1	ALPHAFOLD V2.0 PREDICTION FOR OS05G0526700 PROTEIN (Q65X87)	MOL_ID: 1; ORGANISM_SCIENTIFIC: ORYZA SATIVA SUBSP. JAPONICA; ORGANISM_TAXID: 39947	01-JUL-21	12-OCT-21	n/a	26427.8	0.742	5.54	0.056	1.56	0.0022	3.87	0.0054	21.9	0.35	50.5	20.27	6.8	4.22	25.4	38.1	77.83	1.30491
Q2G1M4-F1	AF-Q2G1M4-F1-model_v1	ALPHAFOLD V2.0 PREDICTION FOR UNCHARACTERIZED PROTEIN (Q2G1M4)	MOL_ID: 1; ORGANISM_SCIENTIFIC: STAPHYLOCOCCUS AUREUS (STRAIN NCTC 8325 / PS 47); ORGANISM_TAXID: 93061	01-JUL-21	12-OCT-21	n/a	7461.2	0.763	10.2	0.1	0.745	0.00096	2.1	0.0027	11	0.17	27.4	10.07	2.16	1.99	96.8	0	80.12	1.30476
A0A0P0Y812-F1	AF-A0A0P0Y812-F1-model_v1	ALPHAFOLD V2.0 PREDICTION FOR OS12G0171900 PROTEIN (A0A0P0Y812)	MOL_ID: 1; ORGANISM_SCIENTIFIC: ORYZA SATIVA SUBSP. JAPONICA; ORGANISM_TAXID: 39947	01-JUL-21	12-OCT-21	n/a	12897.9	0.716	5.94	0.06	0.897	0.0012	3.61	0.0048	31.7	0.5	47.1	18.83	5.31	4.47	3.4	0	53.45	1.30471
A0A0P0WTS2-F1	AF-A0A0P0WTS2-F1-model_v1	ALPHAFOLD V2.0 PREDICTION FOR OS06G0181900 PROTEIN (A0A0P0WTS2)	MOL_ID: 1; ORGANISM_SCIENTIFIC: ORYZA SATIVA SUBSP. JAPONICA; ORGANISM_TAXID: 39947	01-JUL-21	12-OCT-21	n/a	10587	0.723	6.6	0.067	0.798	0.001	3.25	0.0041	26.9	0.42	42.4	15.52	4.56	5.08	0	0	58.99	1.30462
P21754-F1	AF-P21754-F1-model_v1	ALPHAFOLD V2.0 PREDICTION FOR ZONA PELLUCIDA SPERM-BINDING PROTEIN 3 (P21754)	MOL_ID: 1; ORGANISM_SCIENTIFIC: HOMO SAPIENS; ORGANISM_TAXID: 9606	01-JUL-21	12-OCT-21	1-22	44368.9	0.731	4.53	0.046	2.23	0.003	4.73	0.0064	21.8	0.35	61.7	23.81	9.64	6.44	9.7	22.9	79.87	1.30444
Q9LXI8-F1	AF-Q9LXI8-F1-model_v1	ALPHAFOLD V2.0 PREDICTION FOR PROTEIN LITTLE ZIPPER 3 (Q9LXI8)	MOL_ID: 1; ORGANISM_SCIENTIFIC: ARABIDOPSIS THALIANA; ORGANISM_TAXID: 3702	01-JUL-21	12-OCT-21	n/a	7754.8	0.722	8.93	0.09	0.794	0.0011	2.4	0.0032	16.4	0.26	31.3	11.92	3.63	2.42	72.7	0	82.92	1.30417
K7KCZ0-F1	AF-K7KCZ0-F1-model_v1	ALPHAFOLD V2.0 PREDICTION FOR UNCHARACTERIZED PROTEIN (K7KCZ0)	MOL_ID: 1; ORGANISM_SCIENTIFIC: GLYCINE MAX; ORGANISM_TAXID: 3847	01-JUL-21	12-OCT-21	n/a	8962.3	0.751	8.26	0.083	0.76	0.001	2.6	0.0034	17.4	0.28	33.9	13.32	4.93	2.67	60.3	0	71.66	1.30385
C6SXZ5-F1	AF-C6SXZ5-F1-model_v1	ALPHAFOLD V2.0 PREDICTION FOR UNCHARACTERIZED PROTEIN (C6SXZ5)	MOL_ID: 1; ORGANISM_SCIENTIFIC: GLYCINE MAX; ORGANISM_TAXID: 3847	01-JUL-21	12-OCT-21	n/a	16338.8	0.733	6.32	0.064	1.14	0.0015	3.39	0.0044	20	0.32	44.2	16.74	4.74	3.56	62.7	0	77.37	1.30383
A9C3S8-F1	AF-A9C3S8-F1-model_v1	ALPHAFOLD V2.0 PREDICTION FOR SI:DKEY-20D21.12 (A9C3S8)	MOL_ID: 1; ORGANISM_SCIENTIFIC: DANIO RERIO; ORGANISM_TAXID: 7955	01-JUL-21	12-OCT-21	n/a	17459.1	0.735	5.97	0.06	1.14	0.0015	3.59	0.0047	22.2	0.35	46.8	16.77	6.87	6.2	55.6	0	72.09	1.30362
Q9R100-F1	AF-Q9R100-F1-model_v1	ALPHAFOLD V2.0 PREDICTION FOR CADHERIN-17 (Q9R100)	MOL_ID: 1; ORGANISM_SCIENTIFIC: MUS MUSCULUS; ORGANISM_TAXID: 10090	01-JUL-21	12-OCT-21	1-25	88843.5	0.736	3.63	0.037	3.51	0.0043	5.9	0.0072	18.7	0.29	76.9	23.42	12.73	9.23	5.1	33.1	88.76	1.30339
A0A494C0B9-F1	AF-A0A494C0B9-F1-model_v1	ALPHAFOLD V2.0 PREDICTION FOR UNCHARACTERIZED PROTEIN (A0A494C0B9)	MOL_ID: 1; ORGANISM_SCIENTIFIC: HOMO SAPIENS; ORGANISM_TAXID: 9606	01-JUL-21	12-OCT-21	n/a	3318	0.675	13	0.13	0.576	0.00071	1.65	0.002	11.2	0.18	21.5	6.99	3.04	2.17	16.2	0	60.03	1.30303
A0A0P0X8R5-F1	AF-A0A0P0X8R5-F1-model_v1	ALPHAFOLD V2.0 PREDICTION FOR OS07G0605900 PROTEIN (A0A0P0X8R5)	MOL_ID: 1; ORGANISM_SCIENTIFIC: ORYZA SATIVA SUBSP. JAPONICA; ORGANISM_TAXID: 39947	01-JUL-21	12-OCT-21	n/a	10995	0.753	7.81	0.079	0.875	0.0011	2.74	0.0034	15.7	0.25	35.7	9.87	7.43	2.98	55.3	3.9	67.99	1.30292
Q4V8G8-F1	AF-Q4V8G8-F1-model_v1	ALPHAFOLD V2.0 PREDICTION FOR TEKTIN-3 (Q4V8G8)	MOL_ID: 1; ORGANISM_SCIENTIFIC: RATTUS NORVEGICUS; ORGANISM_TAXID: 10116	01-JUL-21	12-OCT-21	n/a	56424.5	0.73	4.03	0.041	2.53	0.0035	5.32	0.0073	23.3	0.37	69.3	26.87	10.53	7.27	73.8	0	85.59	1.30263
Q67VR4-F1	AF-Q67VR4-F1-model_v1	ALPHAFOLD V2.0 PREDICTION FOR OS06G0626801 PROTEIN (Q67VR4)	MOL_ID: 1; ORGANISM_SCIENTIFIC: ORYZA SATIVA SUBSP. JAPONICA; ORGANISM_TAXID: 39947	01-JUL-21	12-OCT-21	n/a	7904.3	0.724	9.39	0.095	0.845	0.0011	2.28	0.003	13.3	0.21	29.7	11.7	2.47	2.19	82.9	0	88.7	1.30263
A0A2R8Y422-F1	AF-A0A2R8Y422-F1-model_v1	ALPHAFOLD V2.0 PREDICTION FOR 40S RIBOSOMAL PROTEIN S27A (A0A2R8Y422)	MOL_ID: 1; ORGANISM_SCIENTIFIC: HOMO SAPIENS; ORGANISM_TAXID: 9606	01-JUL-21	12-OCT-21	n/a	17984.9	0.741	7.05	0.071	1.35	0.0017	3.04	0.0038	12.4	0.19	39.6	12.01	5.48	4.09	11	16.1	88.92	1.30263
O33309-F1	AF-O33309-F1-model_v1	ALPHAFOLD V2.0 PREDICTION FOR POSSIBLE MEMBRANE PROTEIN (O33309)	MOL_ID: 1; ORGANISM_SCIENTIFIC: MYCOBACTERIUM TUBERCULOSIS (STRAIN ATCC 25618 / H37RV); ORGANISM_TAXID: 83332	01-JUL-21	12-OCT-21	n/a	12953.4	0.726	6.18	0.062	0.904	0.0012	3.47	0.0045	27.2	0.43	45.2	16.07	7.24	5.25	34.5	0	59.92	1.30259
I1N7C5-F1	AF-I1N7C5-F1-model_v1	ALPHAFOLD V2.0 PREDICTION FOR UNCHARACTERIZED PROTEIN (I1N7C5)	MOL_ID: 1; ORGANISM_SCIENTIFIC: GLYCINE MAX; ORGANISM_TAXID: 3847	01-JUL-21	12-OCT-21	n/a	7346.6	0.744	9.98	0.1	0.774	0.00097	2.15	0.0027	11.4	0.18	28	9.41	3.38	2.18	85.1	0	78.21	1.30233
Q4DYG1-F1	AF-Q4DYG1-F1-model_v1	ALPHAFOLD V2.0 PREDICTION FOR VACUOLAR PROTEIN SORTING-ASSOCIATED PROTEIN 51 HOMOLOG (Q4DYG1)	MOL_ID: 1; ORGANISM_SCIENTIFIC: TRYPANOSOMA CRUZI (STRAIN CL BRENER); ORGANISM_TAXID: 353153	01-JUL-21	12-OCT-21	n/a	90653.6	0.735	3.77	0.038	3.73	0.0048	5.69	0.0073	17.9	0.28	74.1	26.17	10.49	6.67	68.5	0	75.17	1.30228
A0A0P0Y3J4-F1	AF-A0A0P0Y3J4-F1-model_v1	ALPHAFOLD V2.0 PREDICTION FOR OS11G0577300 PROTEIN (A0A0P0Y3J4)	MOL_ID: 1; ORGANISM_SCIENTIFIC: ORYZA SATIVA SUBSP. JAPONICA; ORGANISM_TAXID: 39947	01-JUL-21	12-OCT-21	n/a	18310.1	0.745	6.69	0.067	1.29	0.0016	3.21	0.004	15.1	0.24	41.8	14.65	5.7	5.01	59.4	14.2	89.72	1.30218
Q9Y5G0-F1	AF-Q9Y5G0-F1-model_v1	ALPHAFOLD V2.0 PREDICTION FOR PROTOCADHERIN GAMMA-B5 (Q9Y5G0)	MOL_ID: 1; ORGANISM_SCIENTIFIC: HOMO SAPIENS; ORGANISM_TAXID: 9606	01-JUL-21	12-OCT-21	1-30	96692.6	0.731	3.29	0.033	3.53	0.0044	6.52	0.0081	23.5	0.37	84.9	29.86	13.16	8.62	7.3	26.2	76.75	1.30215
A0A0P0X5C2-F1	AF-A0A0P0X5C2-F1-model_v1	ALPHAFOLD V2.0 PREDICTION FOR OS07G0444000 PROTEIN (A0A0P0X5C2)	MOL_ID: 1; ORGANISM_SCIENTIFIC: ORYZA SATIVA SUBSP. JAPONICA; ORGANISM_TAXID: 39947	01-JUL-21	12-OCT-21	n/a	10088.3	0.72	7.8	0.079	0.908	0.0012	2.75	0.0037	18.7	0.3	35.8	14.16	4.56	2.73	51.2	0	64.67	1.30182
Q9DAC5-F1	AF-Q9DAC5-F1-model_v1	ALPHAFOLD V2.0 PREDICTION FOR RIKEN CDNA 1700013H16 GENE (Q9DAC5)	MOL_ID: 1; ORGANISM_SCIENTIFIC: MUS MUSCULUS; ORGANISM_TAXID: 10090	01-JUL-21	12-OCT-21	n/a	33614.5	0.717	4.34	0.044	1.7	0.0022	4.94	0.0064	29.4	0.46	64.3	24.75	7.81	6.32	54.5	0	73.09	1.30162
O70255-F1	AF-O70255-F1-model_v1	ALPHAFOLD V2.0 PREDICTION FOR MYELIN PROTEIN ZERO-LIKE PROTEIN 2 (O70255)	MOL_ID: 1; ORGANISM_SCIENTIFIC: MUS MUSCULUS; ORGANISM_TAXID: 10090	01-JUL-21	12-OCT-21	1-26	21436.2	0.737	6.8	0.069	1.58	0.0021	3.15	0.0041	13	0.21	41	14.46	4.65	3.77	35.1	23.9	92.63	1.30159
K7MBS5-F1	AF-K7MBS5-F1-model_v1	ALPHAFOLD V2.0 PREDICTION FOR DEFENSIN-LIKE PROTEIN (K7MBS5)	MOL_ID: 1; ORGANISM_SCIENTIFIC: GLYCINE MAX; ORGANISM_TAXID: 3847	01-JUL-21	12-OCT-21	1-27	10473.4	0.696	9.78	0.099	1.28	0.0016	2.19	0.0027	8.08	0.13	28.5	9.39	3.4	2.66	17.8	34.6	93.07	1.30137
O00453-F1	AF-O00453-F1-model_v1	ALPHAFOLD V2.0 PREDICTION FOR LEUKOCYTE-SPECIFIC TRANSCRIPT 1 PROTEIN (O00453)	MOL_ID: 1; ORGANISM_SCIENTIFIC: HOMO SAPIENS; ORGANISM_TAXID: 9606	01-JUL-21	12-OCT-21	n/a	10796.4	0.735	7.34	0.074	0.866	0.0011	2.92	0.0038	19.7	0.31	38	13.39	6.67	2.41	63.5	0	70.82	1.30137
Q4DH23-F1	AF-Q4DH23-F1-model_v1	ALPHAFOLD V2.0 PREDICTION FOR UNCHARACTERIZED PROTEIN (Q4DH23)	MOL_ID: 1; ORGANISM_SCIENTIFIC: TRYPANOSOMA CRUZI (STRAIN CL BRENER); ORGANISM_TAXID: 353153	01-JUL-21	12-OCT-21	n/a	82702.2	0.734	3.82	0.038	3.47	0.0042	5.61	0.0067	17.4	0.27	73	24.08	9.7	7.52	29.4	14.1	80.05	1.30125
B4FDN9-F1	AF-B4FDN9-F1-model_v1	ALPHAFOLD V2.0 PREDICTION FOR V-TYPE PROTON ATPASE SUBUNIT D (B4FDN9)	MOL_ID: 1; ORGANISM_SCIENTIFIC: ZEA MAYS; ORGANISM_TAXID: 4577	01-JUL-21	12-OCT-21	n/a	29146.6	0.744	5.76	0.058	1.77	0.0022	3.72	0.0047	15.2	0.24	48.4	17.61	4.71	4.46	70.5	6.7	81.5	1.30108
Q6R9J8-F1	AF-Q6R9J8-F1-model_v1	ALPHAFOLD V2.0 PREDICTION FOR UNCHARACTERIZED PROTEIN (Q6R9J8)	MOL_ID: 1; ORGANISM_SCIENTIFIC: ZEA MAYS; ORGANISM_TAXID: 4577	01-JUL-21	12-OCT-21	n/a	11059.9	0.728	6.93	0.07	0.859	0.0012	3.09	0.0041	23.9	0.38	40.2	14.34	6.34	3.21	44.9	0	54.18	1.30097
I1JN62-F1	AF-I1JN62-F1-model_v1	ALPHAFOLD V2.0 PREDICTION FOR CYSTM DOMAIN-CONTAINING PROTEIN (I1JN62)	MOL_ID: 1; ORGANISM_SCIENTIFIC: GLYCINE MAX; ORGANISM_TAXID: 3847	01-JUL-21	12-OCT-21	n/a	6301.9	0.721	9.5	0.096	0.689	0.00084	2.26	0.0027	14.6	0.23	29.4	9.75	4.09	2.84	34.5	0	67.38	1.30088
A4HX40-F1	AF-A4HX40-F1-model_v1	ALPHAFOLD V2.0 PREDICTION FOR PARAFLAGELLAR ROD PROTEIN 2C (A4HX40)	MOL_ID: 1; ORGANISM_SCIENTIFIC: LEISHMANIA INFANTUM; ORGANISM_TAXID: 5671	01-JUL-21	12-OCT-21	n/a	51731.7	0.734	4.57	0.046	2.59	0.0035	4.69	0.0064	18.7	0.3	61	25.31	5.51	4.25	89.6	0	89.22	1.30064
B4FNT9-F1	AF-B4FNT9-F1-model_v1	ALPHAFOLD V2.0 PREDICTION FOR PUTATIVE HLH DNA-BINDING DOMAIN SUPERFAMILY PROTEIN (B4FNT9)	MOL_ID: 1; ORGANISM_SCIENTIFIC: ZEA MAYS; ORGANISM_TAXID: 4577	01-JUL-21	12-OCT-21	n/a	13832.4	0.739	6.79	0.068	1.01	0.0013	3.16	0.0041	19	0.3	41.1	14.54	4.82	3.66	56.5	0	71.14	1.30063
I1NCV9-F1	AF-I1NCV9-F1-model_v1	ALPHAFOLD V2.0 PREDICTION FOR UNCHARACTERIZED PROTEIN (I1NCV9)	MOL_ID: 1; ORGANISM_SCIENTIFIC: GLYCINE MAX; ORGANISM_TAXID: 3847	01-JUL-21	12-OCT-21	n/a	68262.4	0.734	3.76	0.038	2.82	0.0036	5.69	0.0073	23.4	0.37	74	26.88	9.68	7.22	63.8	0	78.05	1.30053
B3H7E3-F1	AF-B3H7E3-F1-model_v1	ALPHAFOLD V2.0 PREDICTION FOR UNCHARACTERIZED PROTEIN (B3H7E3)	MOL_ID: 1; ORGANISM_SCIENTIFIC: ARABIDOPSIS THALIANA; ORGANISM_TAXID: 3702	01-JUL-21	12-OCT-21	n/a	6831.3	0.752	10.6	0.11	0.738	0.00093	2.03	0.0026	10.4	0.16	26.4	9.56	2.13	2.26	96.5	0	84.69	1.30049
O60397-F1	AF-O60397-F1-model_v1	ALPHAFOLD V2.0 PREDICTION FOR PUTATIVE CYTOCHROME C OXIDASE SUBUNIT 7A3, MITOCHONDRIAL (O60397)	MOL_ID: 1; ORGANISM_SCIENTIFIC: HOMO SAPIENS; ORGANISM_TAXID: 9606	01-JUL-21	12-OCT-21	n/a	11847.6	0.751	7.58	0.076	0.922	0.0012	2.83	0.0035	15.8	0.25	36.8	11.11	7.76	2.82	73.3	0	78.85	1.30035
I1NAG3-F1	AF-I1NAG3-F1-model_v1	ALPHAFOLD V2.0 PREDICTION FOR UNCHARACTERIZED PROTEIN (I1NAG3)	MOL_ID: 1; ORGANISM_SCIENTIFIC: GLYCINE MAX; ORGANISM_TAXID: 3847	01-JUL-21	12-OCT-21	n/a	49850.6	0.729	3.67	0.037	2.05	0.0027	5.83	0.0077	33.6	0.53	75.8	29.55	9.11	7.58	63	0	72.53	1.30017
E7FBE3-F1	AF-E7FBE3-F1-model_v1	ALPHAFOLD V2.0 PREDICTION FOR PROTOCADHERIN 9 (E7FBE3)	MOL_ID: 1; ORGANISM_SCIENTIFIC: DANIO RERIO; ORGANISM_TAXID: 7955	01-JUL-21	12-OCT-21	1-23	113883	0.735	2.9	0.029	3.61	0.0045	7.4	0.0092	28	0.44	96.2	35.21	13.22	10.35	6.7	26.7	75.27	1.3
P30273-F1	AF-P30273-F1-model_v1	ALPHAFOLD V2.0 PREDICTION FOR HIGH AFFINITY IMMUNOGLOBULIN EPSILON RECEPTOR SUBUNIT GAMMA (P30273)	MOL_ID: 1; ORGANISM_SCIENTIFIC: HOMO SAPIENS; ORGANISM_TAXID: 9606	01-JUL-21	12-OCT-21	1-18	7810.4	0.751	8.93	0.09	0.717	0.00094	2.4	0.0032	15.9	0.25	31.2	11.99	3.25	2.59	67.2	0	72.19	1.3
Q80U63-F1	AF-Q80U63-F1-model_v1	ALPHAFOLD V2.0 PREDICTION FOR MITOFUSIN-2 (Q80U63)	MOL_ID: 1; ORGANISM_SCIENTIFIC: MUS MUSCULUS; ORGANISM_TAXID: 10090	01-JUL-21	12-OCT-21	n/a	86198.4	0.737	4.12	0.042	3.85	0.0047	5.2	0.0064	13.5	0.21	67.6	23.48	6.39	6.86	62.7	5.2	81.48	1.3
Q9BZE7-F1	AF-Q9BZE7-F1-model_v1	ALPHAFOLD V2.0 PREDICTION FOR UPF0193 PROTEIN EVG1 (Q9BZE7)	MOL_ID: 1; ORGANISM_SCIENTIFIC: HOMO SAPIENS; ORGANISM_TAXID: 9606	01-JUL-21	12-OCT-21	n/a	24973.6	0.736	5.3	0.053	1.44	0.0018	4.04	0.005	21	0.33	52.5	17.84	7.5	5.9	46.3	0	80.99	1.2995
I1L0Q5-F1	AF-I1L0Q5-F1-model_v1	ALPHAFOLD V2.0 PREDICTION FOR HYPK_UBA DOMAIN-CONTAINING PROTEIN (I1L0Q5)	MOL_ID: 1; ORGANISM_SCIENTIFIC: GLYCINE MAX; ORGANISM_TAXID: 3847	01-JUL-21	12-OCT-21	n/a	12187.4	0.734	7.54	0.076	1.01	0.0013	2.84	0.0036	16.3	0.26	36.9	12.95	5.21	3.16	63.3	0	83.14	1.2993
I1MLG1-F1	AF-I1MLG1-F1-model_v1	ALPHAFOLD V2.0 PREDICTION FOR UNCHARACTERIZED PROTEIN (I1MLG1)	MOL_ID: 1; ORGANISM_SCIENTIFIC: GLYCINE MAX; ORGANISM_TAXID: 3847	01-JUL-21	12-OCT-21	1-15	7251.9	0.739	9.17	0.092	0.716	0.00094	2.34	0.0031	15.8	0.25	30.4	11.42	2.39	2.28	63.9	0	67.3	1.29915
Q96R06-F1	AF-Q96R06-F1-model_v1	ALPHAFOLD V2.0 PREDICTION FOR SPERM-ASSOCIATED ANTIGEN 5 (Q96R06)	MOL_ID: 1; ORGANISM_SCIENTIFIC: HOMO SAPIENS; ORGANISM_TAXID: 9606	01-JUL-21	12-OCT-21	n/a	134382	0.733	2	0.02	2.96	0.0041	10.7	0.015	78.9	1.26	139	59.55	16.77	13.54	53.4	0	62.88	1.29907
Q4DCI7-F1	AF-Q4DCI7-F1-model_v1	ALPHAFOLD V2.0 PREDICTION FOR UNCHARACTERIZED PROTEIN (Q4DCI7)	MOL_ID: 1; ORGANISM_SCIENTIFIC: TRYPANOSOMA CRUZI (STRAIN CL BRENER); ORGANISM_TAXID: 353153	01-JUL-21	12-OCT-21	n/a	33228.2	0.726	5.52	0.056	2.07	0.0026	3.88	0.0049	15	0.24	50.4	18.69	5.56	5.01	82.6	0	84.04	1.29897
Q3SY05-F1	AF-Q3SY05-F1-model_v1	ALPHAFOLD V2.0 PREDICTION FOR PUTATIVE UNCHARACTERIZED PROTEIN ENCODED BY LINC00303 (Q3SY05)	MOL_ID: 1; ORGANISM_SCIENTIFIC: HOMO SAPIENS; ORGANISM_TAXID: 9606	01-JUL-21	12-OCT-21	n/a	14569.2	0.726	6.54	0.066	1.08	0.0014	3.28	0.0043	22	0.35	42.6	15.87	5.89	4.63	40.2	0	52.75	1.29878
B9F608-F1	AF-B9F608-F1-model_v1	ALPHAFOLD V2.0 PREDICTION FOR OS03G0782000 PROTEIN (B9F608)	MOL_ID: 1; ORGANISM_SCIENTIFIC: ORYZA SATIVA SUBSP. JAPONICA; ORGANISM_TAXID: 39947	01-JUL-21	12-OCT-21	n/a	9297.2	0.735	8.9	0.09	0.904	0.0011	2.41	0.0029	12.5	0.2	31.3	10.8	3.95	3.11	69.9	0	71.31	1.29876
K7MHT8-F1	AF-K7MHT8-F1-model_v1	ALPHAFOLD V2.0 PREDICTION FOR UNCHARACTERIZED PROTEIN (K7MHT8)	MOL_ID: 1; ORGANISM_SCIENTIFIC: GLYCINE MAX; ORGANISM_TAXID: 3847	01-JUL-21	12-OCT-21	1-22	6151.6	0.724	9.7	0.098	0.679	0.00086	2.21	0.0028	14.9	0.23	28.7	10.2	3.12	2.96	13	0	66.43	1.29864
Q5SSQ6-F1	AF-Q5SSQ6-F1-model_v1	ALPHAFOLD V2.0 PREDICTION FOR SUPPRESSOR APC DOMAIN-CONTAINING PROTEIN 1 (Q5SSQ6)	MOL_ID: 1; ORGANISM_SCIENTIFIC: HOMO SAPIENS; ORGANISM_TAXID: 9606	01-JUL-21	12-OCT-21	n/a	16654.7	0.733	6.03	0.061	1.11	0.0015	3.55	0.0047	24.4	0.39	46.1	17.81	6.5	4.83	60.5	0	74	1.29859
K7TU11-F1	AF-K7TU11-F1-model_v1	ALPHAFOLD V2.0 PREDICTION FOR UNCHARACTERIZED PROTEIN (K7TU11)	MOL_ID: 1; ORGANISM_SCIENTIFIC: ZEA MAYS; ORGANISM_TAXID: 4577	01-JUL-21	12-OCT-21	n/a	9659.3	0.738	7.7	0.078	0.804	0.001	2.78	0.0036	19.5	0.31	36.1	13.12	5.25	2.78	48.2	0	64.31	1.29856
Q8N535-F1	AF-Q8N535-F1-model_v1	ALPHAFOLD V2.0 PREDICTION FOR PUTATIVE UNCHARACTERIZED PROTEIN ENCODED BY LINC00471 (Q8N535)	MOL_ID: 1; ORGANISM_SCIENTIFIC: HOMO SAPIENS; ORGANISM_TAXID: 9606	01-JUL-21	12-OCT-21	n/a	12104.7	0.713	6.21	0.063	0.889	0.0011	3.45	0.0044	28.5	0.45	44.8	16.61	5.86	3.39	0	0	60.3	1.29855
L7MTX3-F1	AF-L7MTX3-F1-model_v1	ALPHAFOLD V2.0 PREDICTION FOR RIKEN CDNA 1700020N15 GENE (L7MTX3)	MOL_ID: 1; ORGANISM_SCIENTIFIC: MUS MUSCULUS; ORGANISM_TAXID: 10090	01-JUL-21	12-OCT-21	n/a	13002.4	0.737	6.39	0.064	0.901	0.0011	3.35	0.0041	23	0.36	43.5	14.17	6.06	4.56	21.6	0	59.85	1.29851
Q965K5-F1	AF-Q965K5-F1-model_v1	ALPHAFOLD V2.0 PREDICTION FOR DYNACTIN COMPLEX COMPONENT (Q965K5)	MOL_ID: 1; ORGANISM_SCIENTIFIC: CAENORHABDITIS ELEGANS; ORGANISM_TAXID: 6239	01-JUL-21	12-OCT-21	n/a	19429.3	0.747	6.4	0.065	1.3	0.0017	3.35	0.0044	16.4	0.26	43.5	15.07	5.27	4.71	77.7	0	76.88	1.29851
F1QXU6-F1	AF-F1QXU6-F1-model_v1	ALPHAFOLD V2.0 PREDICTION FOR E3 UBIQUITIN PROTEIN LIGASE (F1QXU6)	MOL_ID: 1; ORGANISM_SCIENTIFIC: DANIO RERIO; ORGANISM_TAXID: 7955	01-JUL-21	12-OCT-21	n/a	116008	0.732	2.51	0.025	3.21	0.0043	8.55	0.012	46.4	0.74	111	43.56	13.61	10.06	72.5	0.4	72.51	1.29825
Q8NFR7-F1	AF-Q8NFR7-F1-model_v1	ALPHAFOLD V2.0 PREDICTION FOR COILED-COIL DOMAIN-CONTAINING PROTEIN 148 (Q8NFR7)	MOL_ID: 1; ORGANISM_SCIENTIFIC: HOMO SAPIENS; ORGANISM_TAXID: 9606	01-JUL-21	12-OCT-21	n/a	71104.9	0.74	3.33	0.034	2.54	0.0032	6.44	0.0081	31.9	0.5	83.6	28.16	10.84	8.92	77.1	0	79.3	1.29814
Q0JG62-F1	AF-Q0JG62-F1-model_v1	ALPHAFOLD V2.0 PREDICTION FOR OS01G0939800 PROTEIN (Q0JG62)	MOL_ID: 1; ORGANISM_SCIENTIFIC: ORYZA SATIVA SUBSP. JAPONICA; ORGANISM_TAXID: 39947	01-JUL-21	12-OCT-21	n/a	9952.8	0.756	8.4	0.085	0.842	0.0011	2.55	0.0032	14.2	0.22	33.1	11.59	4.73	2.58	81.9	0	73.31	1.29804
Q810R0-F1	AF-Q810R0-F1-model_v1	ALPHAFOLD V2.0 PREDICTION FOR PREDICTED GENE, 21627 (Q810R0)	MOL_ID: 1; ORGANISM_SCIENTIFIC: MUS MUSCULUS; ORGANISM_TAXID: 10090	01-JUL-21	12-OCT-21	n/a	25167.4	0.727	5.23	0.053	1.48	0.002	4.1	0.0054	24.1	0.38	53.2	20.92	6.41	4.43	57.8	4.6	75.28	1.29756
D3YXL0-F1	AF-D3YXL0-F1-model_v1	ALPHAFOLD V2.0 PREDICTION FOR COILED-COIL DOMAIN-CONTAINING 170 (D3YXL0)	MOL_ID: 1; ORGANISM_SCIENTIFIC: MUS MUSCULUS; ORGANISM_TAXID: 10090	01-JUL-21	12-OCT-21	n/a	82798.5	0.731	2.95	0.03	2.71	0.0034	7.26	0.0091	38.4	0.6	94.2	33.5	13.48	10.34	81.7	0	81.27	1.29752
Q7L2Z9-F1	AF-Q7L2Z9-F1-model_v1	ALPHAFOLD V2.0 PREDICTION FOR CENTROMERE PROTEIN Q (Q7L2Z9)	MOL_ID: 1; ORGANISM_SCIENTIFIC: HOMO SAPIENS; ORGANISM_TAXID: 9606	01-JUL-21	12-OCT-21	n/a	30611.9	0.741	4.62	0.046	1.51	0.0017	4.64	0.0054	25.8	0.4	60.2	18.61	9.79	5.96	59.5	0	72.38	1.29741
Q6WQ24-F1	AF-Q6WQ24-F1-model_v1	ALPHAFOLD V2.0 PREDICTION FOR PARATHYROID HORMONE (Q6WQ24)	MOL_ID: 1; ORGANISM_SCIENTIFIC: DANIO RERIO; ORGANISM_TAXID: 7955	01-JUL-21	12-OCT-21	n/a	11576.9	0.752	7.25	0.073	0.858	0.0011	2.96	0.0038	19.1	0.3	38.4	13.2	6.73	2.84	68.4	0	68.24	1.2973
Q9NF10-F1	AF-Q9NF10-F1-model_v1	ALPHAFOLD V2.0 PREDICTION FOR UNCHARACTERIZED PROTEIN (Q9NF10)	MOL_ID: 1; ORGANISM_SCIENTIFIC: CAENORHABDITIS ELEGANS; ORGANISM_TAXID: 6239	01-JUL-21	12-OCT-21	n/a	8293.4	0.73	8.97	0.09	0.828	0.0011	2.39	0.0032	15.4	0.24	31	12.43	2.35	1.94	88.6	0	89.55	1.29707
P49901-F1	AF-P49901-F1-model_v1	ALPHAFOLD V2.0 PREDICTION FOR SPERM MITOCHONDRIAL-ASSOCIATED CYSTEINE-RICH PROTEIN (P49901)	MOL_ID: 1; ORGANISM_SCIENTIFIC: HOMO SAPIENS; ORGANISM_TAXID: 9606	01-JUL-21	12-OCT-21	n/a	12773.8	0.698	6	0.06	0.954	0.0012	3.57	0.0045	29.5	0.46	46.3	16.75	5.59	4.98	0	0	45.98	1.29692
A0A0P0Y018-F1	AF-A0A0P0Y018-F1-model_v1	ALPHAFOLD V2.0 PREDICTION FOR OS11G0183800 PROTEIN (A0A0P0Y018)	MOL_ID: 1; ORGANISM_SCIENTIFIC: ORYZA SATIVA SUBSP. JAPONICA; ORGANISM_TAXID: 39947	01-JUL-21	12-OCT-21	n/a	119065	0.748	3.9	0.039	4.83	0.0062	5.49	0.007	12	0.19	71.2	26.54	6.97	5.97	64.5	5	89.07	1.2969
A0A0P0YAH7-F1	AF-A0A0P0YAH7-F1-model_v1	ALPHAFOLD V2.0 PREDICTION FOR OS12G0502600 PROTEIN (A0A0P0YAH7)	MOL_ID: 1; ORGANISM_SCIENTIFIC: ORYZA SATIVA SUBSP. JAPONICA; ORGANISM_TAXID: 39947	01-JUL-21	12-OCT-21	n/a	7859	0.752	9.8	0.099	0.788	0.001	2.19	0.0028	11.5	0.18	28.4	10.78	2.36	2.09	95.4	0	92.05	1.2968
A0A0P0W686-F1	AF-A0A0P0W686-F1-model_v1	ALPHAFOLD V2.0 PREDICTION FOR OS04G0121900 PROTEIN (A0A0P0W686)	MOL_ID: 1; ORGANISM_SCIENTIFIC: ORYZA SATIVA SUBSP. JAPONICA; ORGANISM_TAXID: 39947	01-JUL-21	12-OCT-21	n/a	6965.6	0.734	9.1	0.092	0.695	0.00095	2.36	0.0032	17.5	0.28	30.6	12.21	3.44	2.49	60.9	0	65.86	1.29661
A0A0P0XKM9-F1	AF-A0A0P0XKM9-F1-model_v1	ALPHAFOLD V2.0 PREDICTION FOR OS09G0309000 PROTEIN (A0A0P0XKM9)	MOL_ID: 1; ORGANISM_SCIENTIFIC: ORYZA SATIVA SUBSP. JAPONICA; ORGANISM_TAXID: 39947	01-JUL-21	12-OCT-21	n/a	10937.6	0.729	7.21	0.073	0.881	0.0011	2.97	0.0039	21.5	0.34	38.5	13.77	4.95	3.6	58.2	0	58.35	1.2963
K7LHN2-F1	AF-K7LHN2-F1-model_v1	ALPHAFOLD V2.0 PREDICTION FOR UNCHARACTERIZED PROTEIN (K7LHN2)	MOL_ID: 1; ORGANISM_SCIENTIFIC: GLYCINE MAX; ORGANISM_TAXID: 3847	01-JUL-21	12-OCT-21	n/a	6911.4	0.753	9.22	0.093	0.649	0.0008	2.33	0.0029	14.9	0.23	30.2	9.6	5.17	2.4	56.7	0	58.82	1.29614
P22794-F1	AF-P22794-F1-model_v1	ALPHAFOLD V2.0 PREDICTION FOR PROTEIN EVI2A (P22794)	MOL_ID: 1; ORGANISM_SCIENTIFIC: HOMO SAPIENS; ORGANISM_TAXID: 9606	01-JUL-21	12-OCT-21	1-30	22903.7	0.731	4.63	0.047	1.18	0.0015	4.63	0.0059	36.9	0.58	60	21.09	8.17	6.36	21.5	0	55.91	1.2959
Q8I3K7-F1	AF-Q8I3K7-F1-model_v1	ALPHAFOLD V2.0 PREDICTION FOR INNER MEMBRANE COMPLEX PROTEIN 1G, PUTATIVE (Q8I3K7)	MOL_ID: 1; ORGANISM_SCIENTIFIC: PLASMODIUM FALCIPARUM (ISOLATE 3D7); ORGANISM_TAXID: 36329	01-JUL-21	12-OCT-21	n/a	34345.9	0.746	3.82	0.038	1.37	0.0018	5.62	0.0072	42.9	0.68	72.8	26.25	10.55	7.33	4	0	59.08	1.29537
K7MV53-F1	AF-K7MV53-F1-model_v1	ALPHAFOLD V2.0 PREDICTION FOR UNCHARACTERIZED PROTEIN (K7MV53)	MOL_ID: 1; ORGANISM_SCIENTIFIC: GLYCINE MAX; ORGANISM_TAXID: 3847	01-JUL-21	12-OCT-21	n/a	6596.2	0.711	10.2	0.1	0.802	0.001	2.1	0.0027	12.3	0.19	27.2	10.14	2.29	1.99	95.2	0	77.5	1.29524
Q4DLF8-F1	AF-Q4DLF8-F1-model_v1	ALPHAFOLD V2.0 PREDICTION FOR UNCHARACTERIZED PROTEIN (Q4DLF8)	MOL_ID: 1; ORGANISM_SCIENTIFIC: TRYPANOSOMA CRUZI (STRAIN CL BRENER); ORGANISM_TAXID: 353153	01-JUL-21	12-OCT-21	n/a	13850.8	0.724	7.03	0.071	1.11	0.0014	3.05	0.0038	16.8	0.26	39.5	12.44	7.1	3.65	80.5	0	76.45	1.29508
O14645-F1	AF-O14645-F1-model_v1	ALPHAFOLD V2.0 PREDICTION FOR AXONEMAL DYNEIN LIGHT INTERMEDIATE POLYPEPTIDE 1 (O14645)	MOL_ID: 1; ORGANISM_SCIENTIFIC: HOMO SAPIENS; ORGANISM_TAXID: 9606	01-JUL-21	12-OCT-21	n/a	29671	0.736	5.14	0.052	1.66	0.0022	4.17	0.0055	21.3	0.34	54	19.01	7.98	5.47	61.1	3.1	83.99	1.29496
E7F6V4-F1	AF-E7F6V4-F1-model_v1	ALPHAFOLD V2.0 PREDICTION FOR SI:DKEY-54N8.4 (E7F6V4)	MOL_ID: 1; ORGANISM_SCIENTIFIC: DANIO RERIO; ORGANISM_TAXID: 7955	01-JUL-21	12-OCT-21	n/a	32839.6	0.726	4.33	0.044	1.6	0.0021	4.95	0.0064	31.5	0.5	64.1	24.55	8.76	7.21	54	0	76.19	1.29495
O01860-F1	AF-O01860-F1-model_v1	ALPHAFOLD V2.0 PREDICTION FOR COLLAGEN (O01860)	MOL_ID: 1; ORGANISM_SCIENTIFIC: CAENORHABDITIS ELEGANS; ORGANISM_TAXID: 6239	01-JUL-21	12-OCT-21	n/a	15625.3	0.709	5.75	0.058	1.08	0.0014	3.73	0.005	28.7	0.46	48.3	18.71	8.79	4.24	11.1	0	65.7	1.29491
I1MAP9-F1	AF-I1MAP9-F1-model_v1	ALPHAFOLD V2.0 PREDICTION FOR UNCHARACTERIZED PROTEIN (I1MAP9)	MOL_ID: 1; ORGANISM_SCIENTIFIC: GLYCINE MAX; ORGANISM_TAXID: 3847	01-JUL-21	12-OCT-21	n/a	8374.4	0.732	7.98	0.08	0.739	0.00092	2.68	0.0033	19.1	0.3	34.7	11	6.7	2.65	40.3	0	63.62	1.29478
D4A213-F1	AF-D4A213-F1-model_v1	ALPHAFOLD V2.0 PREDICTION FOR SCAVENGER RECEPTOR CLASS A MEMBER 5 (D4A213)	MOL_ID: 1; ORGANISM_SCIENTIFIC: RATTUS NORVEGICUS; ORGANISM_TAXID: 10116	01-JUL-21	12-OCT-21	n/a	53864	0.729	3.76	0.038	2.26	0.0029	5.7	0.0073	29.5	0.46	73.8	27.42	8.14	7.42	50	4.5	73.61	1.29474
K7M6A6-F1	AF-K7M6A6-F1-model_v1	ALPHAFOLD V2.0 PREDICTION FOR UNCHARACTERIZED PROTEIN (K7M6A6)	MOL_ID: 1; ORGANISM_SCIENTIFIC: GLYCINE MAX; ORGANISM_TAXID: 3847	01-JUL-21	12-OCT-21	n/a	6740.4	0.713	8.4	0.085	0.67	0.00083	2.55	0.0032	20.6	0.32	33	11.97	4.55	3.21	0	0	62.72	1.29412
A0A1D6H2S9-F1	AF-A0A1D6H2S9-F1-model_v1	ALPHAFOLD V2.0 PREDICTION FOR AUTOPHAGY-RELATED PROTEIN 11 (A0A1D6H2S9)	MOL_ID: 1; ORGANISM_SCIENTIFIC: ZEA MAYS; ORGANISM_TAXID: 4577	01-JUL-21	12-OCT-21	n/a	16379.6	0.734	7.01	0.071	1.26	0.0017	3.06	0.0041	16.2	0.26	39.6	16.09	3.84	3.06	88.2	0	92.49	1.29412
O95976-F1	AF-O95976-F1-model_v1	ALPHAFOLD V2.0 PREDICTION FOR IMMUNOGLOBULIN SUPERFAMILY MEMBER 6 (O95976)	MOL_ID: 1; ORGANISM_SCIENTIFIC: HOMO SAPIENS; ORGANISM_TAXID: 9606	01-JUL-21	12-OCT-21	1-27	24233.1	0.733	5.88	0.059	1.57	0.0019	3.64	0.0044	15.8	0.25	47.1	14.24	7.59	5.33	34.3	24.4	82.59	1.29396
Q5Q0I9-F1	AF-Q5Q0I9-F1-model_v1	ALPHAFOLD V2.0 PREDICTION FOR UNCHARACTERIZED PROTEIN (Q5Q0I9)	MOL_ID: 1; ORGANISM_SCIENTIFIC: ARABIDOPSIS THALIANA; ORGANISM_TAXID: 3702	01-JUL-21	12-OCT-21	n/a	13457.4	0.74	6.17	0.062	0.89	0.001	3.47	0.0041	24.9	0.39	44.9	13.76	7.99	5.06	65.6	0	52.28	1.29395
I1N7U0-F1	AF-I1N7U0-F1-model_v1	ALPHAFOLD V2.0 PREDICTION FOR UNCHARACTERIZED PROTEIN (I1N7U0)	MOL_ID: 1; ORGANISM_SCIENTIFIC: GLYCINE MAX; ORGANISM_TAXID: 3847	01-JUL-21	12-OCT-21	1-15	7046.7	0.741	9.39	0.095	0.707	0.00092	2.28	0.003	14.7	0.23	29.5	11.02	2.74	2.19	65	0	68	1.29386
I1LJ29-F1	AF-I1LJ29-F1-model_v1	ALPHAFOLD V2.0 PREDICTION FOR UNCHARACTERIZED PROTEIN (I1LJ29)	MOL_ID: 1; ORGANISM_SCIENTIFIC: GLYCINE MAX; ORGANISM_TAXID: 3847	01-JUL-21	12-OCT-21	n/a	27099.5	0.737	4.63	0.047	1.36	0.0017	4.63	0.0059	30	0.47	59.9	20.19	10.42	6.62	54.7	0	69.86	1.29374
E7FCH1-F1	AF-E7FCH1-F1-model_v1	ALPHAFOLD V2.0 PREDICTION FOR SI:DKEY-21A6.5 (E7FCH1)	MOL_ID: 1; ORGANISM_SCIENTIFIC: DANIO RERIO; ORGANISM_TAXID: 7955	01-JUL-21	12-OCT-21	1-21	33554.9	0.716	4.99	0.05	1.96	0.0024	4.29	0.0054	20.8	0.33	55.5	20.63	6.45	5.08	13.3	1.9	81.43	1.29371
A0A1D8PK69-F1	AF-A0A1D8PK69-F1-model_v1	ALPHAFOLD V2.0 PREDICTION FOR USO6P (A0A1D8PK69)	MOL_ID: 1; ORGANISM_SCIENTIFIC: CANDIDA ALBICANS (STRAIN SC5314 / ATCC MYA-2876); ORGANISM_TAXID: 237561	01-JUL-21	12-OCT-21	n/a	128585	0.734	1.96	0.02	2.77	0.0038	10.9	0.015	86	1.38	141	60.96	16.17	14.88	39.3	0	53.16	1.29358
Q13503-F1	AF-Q13503-F1-model_v1	ALPHAFOLD V2.0 PREDICTION FOR MEDIATOR OF RNA POLYMERASE II TRANSCRIPTION SUBUNIT 21 (Q13503)	MOL_ID: 1; ORGANISM_SCIENTIFIC: HOMO SAPIENS; ORGANISM_TAXID: 9606	01-JUL-21	12-OCT-21	n/a	15554.9	0.728	6.92	0.07	1.21	0.0016	3.1	0.004	16.7	0.26	40.1	14.99	6.2	2.72	72.7	0	84.66	1.29355
P55797-F1	AF-P55797-F1-model_v1	ALPHAFOLD V2.0 PREDICTION FOR APOLIPOPROTEIN C-IV (P55797)	MOL_ID: 1; ORGANISM_SCIENTIFIC: RATTUS NORVEGICUS; ORGANISM_TAXID: 10116	01-JUL-21	12-OCT-21	1-27	11553.6	0.726	7.92	0.08	1.03	0.0013	2.7	0.0035	14.5	0.23	34.9	12.1	4.92	2.95	65.6	0	80.57	1.29259
A0A2R8QDR2-F1	AF-A0A2R8QDR2-F1-model_v1	ALPHAFOLD V2.0 PREDICTION FOR UNCHARACTERIZED PROTEIN (A0A2R8QDR2)	MOL_ID: 1; ORGANISM_SCIENTIFIC: DANIO RERIO; ORGANISM_TAXID: 7955	01-JUL-21	12-OCT-21	1-20	15151.1	0.731	6.4	0.065	1.08	0.0013	3.35	0.0042	20.7	0.32	43.3	15.58	4.94	3.65	51.5	0	73.38	1.29254
Q8NFZ8-F1	AF-Q8NFZ8-F1-model_v1	ALPHAFOLD V2.0 PREDICTION FOR CELL ADHESION MOLECULE 4 (Q8NFZ8)	MOL_ID: 1; ORGANISM_SCIENTIFIC: HOMO SAPIENS; ORGANISM_TAXID: 9606	01-JUL-21	12-OCT-21	1-20	40511.7	0.731	4.78	0.048	2.15	0.0028	4.48	0.0058	19.7	0.31	57.9	21.82	8.63	4.26	10.9	35.1	87.48	1.29241
K7MRB4-F1	AF-K7MRB4-F1-model_v1	ALPHAFOLD V2.0 PREDICTION FOR UNCHARACTERIZED PROTEIN (K7MRB4)	MOL_ID: 1; ORGANISM_SCIENTIFIC: GLYCINE MAX; ORGANISM_TAXID: 3847	01-JUL-21	12-OCT-21	n/a	11717.2	0.732	7.36	0.074	0.952	0.0012	2.91	0.0037	17.6	0.28	37.6	12.23	6.86	2.81	62.4	0	62.86	1.2921
U3JB01-F1	AF-U3JB01-F1-model_v1	ALPHAFOLD V2.0 PREDICTION FOR SH2 DOMAIN-CONTAINING 4BB (U3JB01)	MOL_ID: 1; ORGANISM_SCIENTIFIC: DANIO RERIO; ORGANISM_TAXID: 7955	01-JUL-21	12-OCT-21	n/a	53284.8	0.722	3.86	0.039	2.36	0.0031	5.55	0.0073	28.1	0.44	71.7	27.74	9.86	5.07	50.2	4	79.05	1.29189
A0A1P8BH47-F1	AF-A0A1P8BH47-F1-model_v1	ALPHAFOLD V2.0 PREDICTION FOR UNCHARACTERIZED PROTEIN (A0A1P8BH47)	MOL_ID: 1; ORGANISM_SCIENTIFIC: ARABIDOPSIS THALIANA; ORGANISM_TAXID: 3702	01-JUL-21	12-OCT-21	n/a	6648.7	0.751	10.3	0.1	0.7	0.00093	2.09	0.0028	12.4	0.2	27	10.89	2.51	2.11	78	0	76.38	1.29187
I1KF64-F1	AF-I1KF64-F1-model_v1	ALPHAFOLD V2.0 PREDICTION FOR UNCHARACTERIZED PROTEIN (I1KF64)	MOL_ID: 1; ORGANISM_SCIENTIFIC: GLYCINE MAX; ORGANISM_TAXID: 3847	01-JUL-21	12-OCT-21	n/a	37978.6	0.751	4.88	0.049	1.9	0.0022	4.39	0.0052	18.6	0.29	56.7	18.39	7.28	7.05	61.2	0	71.48	1.29157
Q9WVS0-F1	AF-Q9WVS0-F1-model_v1	ALPHAFOLD V2.0 PREDICTION FOR INDUCIBLE T-CELL COSTIMULATOR (Q9WVS0)	MOL_ID: 1; ORGANISM_SCIENTIFIC: MUS MUSCULUS; ORGANISM_TAXID: 10090	01-JUL-21	12-OCT-21	1-20	20278.4	0.736	6.43	0.065	1.42	0.0018	3.33	0.0043	16.8	0.26	43	16.62	4.95	4.07	22.4	26.3	72.93	1.29129
M9MRX3-F1	AF-M9MRX3-F1-model_v1	ALPHAFOLD V2.0 PREDICTION FOR GEO02653P1 (M9MRX3)	MOL_ID: 1; ORGANISM_SCIENTIFIC: DROSOPHILA MELANOGASTER; ORGANISM_TAXID: 7227	01-JUL-21	12-OCT-21	1-25	8198.5	0.705	8.87	0.089	0.884	0.0011	2.41	0.0029	13.8	0.22	31.1	10.68	3.79	2.57	37.3	0	61.61	1.29046
Q8IUB9-F1	AF-Q8IUB9-F1-model_v1	ALPHAFOLD V2.0 PREDICTION FOR KERATIN-ASSOCIATED PROTEIN 19-1 (Q8IUB9)	MOL_ID: 1; ORGANISM_SCIENTIFIC: HOMO SAPIENS; ORGANISM_TAXID: 9606	01-JUL-21	12-OCT-21	n/a	9011.7	0.688	7.69	0.078	0.891	0.0012	2.79	0.0036	19.7	0.31	36	12.58	4.59	3.69	0	0	49.23	1.29032
B4FJP1-F1	AF-B4FJP1-F1-model_v1	ALPHAFOLD V2.0 PREDICTION FOR ATPASE E1 (B4FJP1)	MOL_ID: 1; ORGANISM_SCIENTIFIC: ZEA MAYS; ORGANISM_TAXID: 4577	01-JUL-21	12-OCT-21	n/a	18569.2	0.725	6.82	0.069	1.44	0.0018	3.14	0.004	14.3	0.22	40.5	14.13	4.38	4.8	45.7	9.8	73.63	1.28981
Q3UUY6-F1	AF-Q3UUY6-F1-model_v1	ALPHAFOLD V2.0 PREDICTION FOR PROMININ-2 (Q3UUY6)	MOL_ID: 1; ORGANISM_SCIENTIFIC: MUS MUSCULUS; ORGANISM_TAXID: 10090	01-JUL-21	12-OCT-21	1-27	90494.5	0.744	4.01	0.04	3.83	0.0052	5.35	0.0072	15.5	0.25	69	26.96	7.73	5.5	73.1	0	86.41	1.28972
A0A1D6FHZ4-F1	AF-A0A1D6FHZ4-F1-model_v1	ALPHAFOLD V2.0 PREDICTION FOR CELL DIVISION CYCLE 20.1 COFACTOR OF APC COMPLEX (A0A1D6FHZ4)	MOL_ID: 1; ORGANISM_SCIENTIFIC: ZEA MAYS; ORGANISM_TAXID: 4577	01-JUL-21	12-OCT-21	n/a	16466.7	0.751	6.54	0.066	1.11	0.0015	3.28	0.0044	18.5	0.29	42.3	14.46	7.86	3.52	62.1	0	68.79	1.28963
Q765I0-F1	AF-Q765I0-F1-model_v1	ALPHAFOLD V2.0 PREDICTION FOR UROTENSIN-2B (Q765I0)	MOL_ID: 1; ORGANISM_SCIENTIFIC: HOMO SAPIENS; ORGANISM_TAXID: 9606	01-JUL-21	12-OCT-21	1-28	10755.9	0.735	7.84	0.079	0.922	0.0011	2.73	0.0033	15.7	0.25	35.2	11.87	5.15	3.27	48.9	0	64.7	1.28938
K7MP07-F1	AF-K7MP07-F1-model_v1	ALPHAFOLD V2.0 PREDICTION FOR UNCHARACTERIZED PROTEIN (K7MP07)	MOL_ID: 1; ORGANISM_SCIENTIFIC: GLYCINE MAX; ORGANISM_TAXID: 3847	01-JUL-21	12-OCT-21	n/a	6430.3	0.774	10.9	0.11	0.651	0.00083	1.97	0.0025	10.2	0.16	25.4	9.52	2.34	2.26	94.5	0	75.04	1.28934
I1KTS9-F1	AF-I1KTS9-F1-model_v1	ALPHAFOLD V2.0 PREDICTION FOR UNCHARACTERIZED PROTEIN (I1KTS9)	MOL_ID: 1; ORGANISM_SCIENTIFIC: GLYCINE MAX; ORGANISM_TAXID: 3847	01-JUL-21	12-OCT-21	n/a	16781.5	0.73	6.74	0.068	1.26	0.0016	3.18	0.004	16.1	0.25	41	15.31	5.85	3.31	83.4	0	84.41	1.28931
Q18237-F1	AF-Q18237-F1-model_v1	ALPHAFOLD V2.0 PREDICTION FOR STRUCTURAL MAINTENANCE OF CHROMOSOMES PROTEIN 5 (Q18237)	MOL_ID: 1; ORGANISM_SCIENTIFIC: CAENORHABDITIS ELEGANS; ORGANISM_TAXID: 6239	01-JUL-21	12-OCT-21	n/a	123479	0.733	3.42	0.034	4.65	0.0055	6.26	0.0074	15.9	0.25	80.7	26.95	9.23	8.15	62	7.2	81.46	1.28914
Q8NCX0-F1	AF-Q8NCX0-F1-model_v1	ALPHAFOLD V2.0 PREDICTION FOR COILED-COIL DOMAIN-CONTAINING PROTEIN 150 (Q8NCX0)	MOL_ID: 1; ORGANISM_SCIENTIFIC: HOMO SAPIENS; ORGANISM_TAXID: 9606	01-JUL-21	12-OCT-21	n/a	128781	0.735	2.23	0.022	3.13	0.004	9.62	0.012	58.8	0.93	124	47.51	18.38	10.55	85.2	0	74.44	1.28898
Q96EX1-F1	AF-Q96EX1-F1-model_v1	ALPHAFOLD V2.0 PREDICTION FOR SMALL INTEGRAL MEMBRANE PROTEIN 12 (Q96EX1)	MOL_ID: 1; ORGANISM_SCIENTIFIC: HOMO SAPIENS; ORGANISM_TAXID: 9606	01-JUL-21	12-OCT-21	n/a	10802.4	0.743	8.16	0.082	0.934	0.0011	2.63	0.0032	13.6	0.21	33.9	11.73	4.32	3.39	60.4	0	77.6	1.28897
Q9Y5G2-F1	AF-Q9Y5G2-F1-model_v1	ALPHAFOLD V2.0 PREDICTION FOR PROTOCADHERIN GAMMA-B2 (Q9Y5G2)	MOL_ID: 1; ORGANISM_SCIENTIFIC: HOMO SAPIENS; ORGANISM_TAXID: 9606	01-JUL-21	12-OCT-21	1-30	97599.9	0.732	3.21	0.032	3.46	0.0045	6.68	0.0086	24.7	0.39	86.1	30.33	12.92	9.56	9.3	24.8	76.59	1.28892
P0DP88-F1	AF-P0DP88-F1-model_v1	ALPHAFOLD V2.0 PREDICTION FOR PROTEIN MYOMIXER (P0DP88)	MOL_ID: 1; ORGANISM_SCIENTIFIC: DANIO RERIO; ORGANISM_TAXID: 7955	01-JUL-21	12-OCT-21	n/a	8336.8	0.76	9.23	0.093	0.762	0.00097	2.32	0.003	12.7	0.2	29.9	10.78	4.18	2.54	96	0	72.27	1.28879
D4A1J6-F1	AF-D4A1J6-F1-model_v1	ALPHAFOLD V2.0 PREDICTION FOR ANKYRIN REPEAT AND FYVE DOMAIN-CONTAINING 1 (D4A1J6)	MOL_ID: 1; ORGANISM_SCIENTIFIC: RATTUS NORVEGICUS; ORGANISM_TAXID: 10116	01-JUL-21	12-OCT-21	n/a	128657	0.737	3.49	0.035	4.87	0.006	6.13	0.0075	14.3	0.22	79	25.57	13.2	8.21	42.5	1.9	86.41	1.28874
A4IC94-F1	AF-A4IC94-F1-model_v1	ALPHAFOLD V2.0 PREDICTION FOR RIB72_PROTEIN-LIKE_PROTEIN (A4IC94)	MOL_ID: 1; ORGANISM_SCIENTIFIC: LEISHMANIA INFANTUM; ORGANISM_TAXID: 5671	01-JUL-21	12-OCT-21	n/a	84054.3	0.73	3.89	0.039	3.64	0.0045	5.51	0.0068	16	0.25	71	23.21	11.54	5.73	30.5	14.1	78.61	1.28857
Q66GR4-F1	AF-Q66GR4-F1-model_v1	ALPHAFOLD V2.0 PREDICTION FOR AT4G35070 (Q66GR4)	MOL_ID: 1; ORGANISM_SCIENTIFIC: ARABIDOPSIS THALIANA; ORGANISM_TAXID: 3702	01-JUL-21	12-OCT-21	n/a	30249.1	0.726	5.07	0.051	1.73	0.0022	4.23	0.0053	20.5	0.32	54.5	19.25	6.56	5.49	54.5	3.4	76.29	1.28842
Q0JE85-F1	AF-Q0JE85-F1-model_v1	ALPHAFOLD V2.0 PREDICTION FOR OS04G0311100 PROTEIN (Q0JE85)	MOL_ID: 1; ORGANISM_SCIENTIFIC: ORYZA SATIVA SUBSP. JAPONICA; ORGANISM_TAXID: 39947	01-JUL-21	12-OCT-21	n/a	7329.1	0.725	9.95	0.1	0.827	0.0011	2.15	0.0028	11.8	0.19	27.7	10.25	2.26	2.31	96.8	0	95.57	1.28837
Q54JQ0-F1	AF-Q54JQ0-F1-model_v1	ALPHAFOLD V2.0 PREDICTION FOR PUTATIVE UNCHARACTERIZED TRANSMEMBRANE PROTEIN DDB_G0287865 (Q54JQ0)	MOL_ID: 1; ORGANISM_SCIENTIFIC: DICTYOSTELIUM DISCOIDEUM; ORGANISM_TAXID: 44689	01-JUL-21	12-OCT-21	n/a	7360.9	0.773	9.66	0.097	0.666	0.00085	2.22	0.0028	12.7	0.2	28.6	10.35	3.05	2.26	83.6	0	81.84	1.28829
Q54LH4-F1	AF-Q54LH4-F1-model_v1	ALPHAFOLD V2.0 PREDICTION FOR PUTATIVE UNCHARACTERIZED PROTEIN DDB_G0286635 (Q54LH4)	MOL_ID: 1; ORGANISM_SCIENTIFIC: DICTYOSTELIUM DISCOIDEUM; ORGANISM_TAXID: 44689	01-JUL-21	12-OCT-21	n/a	7901.2	0.732	9.35	0.094	0.816	0.0011	2.29	0.003	13.4	0.21	29.5	11.28	2.46	2.05	85.9	0	84.42	1.28821
I1N6J5-F1	AF-I1N6J5-F1-model_v1	ALPHAFOLD V2.0 PREDICTION FOR UNCHARACTERIZED PROTEIN (I1N6J5)	MOL_ID: 1; ORGANISM_SCIENTIFIC: GLYCINE MAX; ORGANISM_TAXID: 3847	01-JUL-21	12-OCT-21	n/a	6449.8	0.7	10.5	0.11	0.834	0.0011	2.05	0.0026	11.5	0.18	26.4	9.99	2.19	1.96	96.7	0	77.21	1.2878
A0A0P0WAE1-F1	AF-A0A0P0WAE1-F1-model_v1	ALPHAFOLD V2.0 PREDICTION FOR OS04G0435300 PROTEIN (A0A0P0WAE1)	MOL_ID: 1; ORGANISM_SCIENTIFIC: ORYZA SATIVA SUBSP. JAPONICA; ORGANISM_TAXID: 39947	01-JUL-21	12-OCT-21	n/a	8842	0.729	9.18	0.093	0.907	0.0011	2.33	0.0028	11.6	0.18	30	10.43	4.14	2.24	95.8	0	67.48	1.28755
K7LW11-F1	AF-K7LW11-F1-model_v1	ALPHAFOLD V2.0 PREDICTION FOR UNCHARACTERIZED PROTEIN (K7LW11)	MOL_ID: 1; ORGANISM_SCIENTIFIC: GLYCINE MAX; ORGANISM_TAXID: 3847	01-JUL-21	12-OCT-21	n/a	11006.4	0.748	8.68	0.087	0.993	0.0012	2.47	0.0031	11.2	0.18	31.8	11.33	3.98	2.32	91.7	0	91.99	1.28745
B0FP48-F1	AF-B0FP48-F1-model_v1	ALPHAFOLD V2.0 PREDICTION FOR UROPLAKIN-3B-LIKE PROTEIN 1 (B0FP48)	MOL_ID: 1; ORGANISM_SCIENTIFIC: HOMO SAPIENS; ORGANISM_TAXID: 9606	01-JUL-21	12-OCT-21	1-33	24859.4	0.736	5.81	0.059	1.57	0.0021	3.69	0.0049	19	0.3	47.5	18.21	5.63	4.78	21.4	12.7	85.44	1.28726
I1LJQ6-F1	AF-I1LJQ6-F1-model_v1	ALPHAFOLD V2.0 PREDICTION FOR UNCHARACTERIZED PROTEIN (I1LJQ6)	MOL_ID: 1; ORGANISM_SCIENTIFIC: GLYCINE MAX; ORGANISM_TAXID: 3847	01-JUL-21	12-OCT-21	n/a	16334.7	0.742	6.48	0.065	1.13	0.0014	3.31	0.0041	19	0.3	42.6	14.74	5.54	4.35	3.4	12.3	76.56	1.28701
Q96J77-F1	AF-Q96J77-F1-model_v1	ALPHAFOLD V2.0 PREDICTION FOR TUMOR PROTEIN D55 (Q96J77)	MOL_ID: 1; ORGANISM_SCIENTIFIC: HOMO SAPIENS; ORGANISM_TAXID: 9606	01-JUL-21	12-OCT-21	n/a	15517.2	0.743	6.33	0.064	1.04	0.0013	3.38	0.0042	19.8	0.31	43.5	14.03	8.51	6.15	73.4	0	71.01	1.28698
K7KA96-F1	AF-K7KA96-F1-model_v1	ALPHAFOLD V2.0 PREDICTION FOR UNCHARACTERIZED PROTEIN (K7KA96)	MOL_ID: 1; ORGANISM_SCIENTIFIC: GLYCINE MAX; ORGANISM_TAXID: 3847	01-JUL-21	12-OCT-21	n/a	8957.7	0.751	9.03	0.091	0.83	0.001	2.37	0.003	12.8	0.2	30.5	10.79	4.35	2.74	88.3	0	71.74	1.28692
A0A0R0KJA0-F1	AF-A0A0R0KJA0-F1-model_v1	ALPHAFOLD V2.0 PREDICTION FOR UNCHARACTERIZED PROTEIN (A0A0R0KJA0)	MOL_ID: 1; ORGANISM_SCIENTIFIC: GLYCINE MAX; ORGANISM_TAXID: 3847	01-JUL-21	12-OCT-21	n/a	7783	0.733	9.04	0.091	0.774	0.001	2.37	0.003	15	0.24	30.5	11.33	3.53	3.17	0	11.8	76.92	1.28692
O05312-F1	AF-O05312-F1-model_v1	ALPHAFOLD V2.0 PREDICTION FOR CONSERVED PROTEIN (O05312)	MOL_ID: 1; ORGANISM_SCIENTIFIC: MYCOBACTERIUM TUBERCULOSIS (STRAIN ATCC 25618 / H37RV); ORGANISM_TAXID: 83332	01-JUL-21	12-OCT-21	n/a	7810.3	0.734	9.06	0.091	0.776	0.001	2.37	0.0031	15.1	0.24	30.5	11.21	4.24	2.25	18.9	20.3	82.33	1.28692
Q54QZ8-F1	AF-Q54QZ8-F1-model_v1	ALPHAFOLD V2.0 PREDICTION FOR PUTATIVE UNCHARACTERIZED PROTEIN DDB_G0283467 (Q54QZ8)	MOL_ID: 1; ORGANISM_SCIENTIFIC: DICTYOSTELIUM DISCOIDEUM; ORGANISM_TAXID: 44689	01-JUL-21	12-OCT-21	n/a	7276.8	0.709	10.1	0.1	0.879	0.0012	2.13	0.0029	12.2	0.19	27.4	11.1	2.43	1.76	0	69	83.55	1.28638
A0A2R8QGY1-F1	AF-A0A2R8QGY1-F1-model_v1	ALPHAFOLD V2.0 PREDICTION FOR UNCHARACTERIZED PROTEIN (A0A2R8QGY1)	MOL_ID: 1; ORGANISM_SCIENTIFIC: DANIO RERIO; ORGANISM_TAXID: 7955	01-JUL-21	12-OCT-21	n/a	6506.9	0.746	9.42	0.095	0.642	0.00081	2.27	0.0029	15.3	0.24	29.2	10.03	4.11	2.37	46.3	0	66.27	1.28634
A0A1B0GVQ0-F1	AF-A0A1B0GVQ0-F1-model_v1	ALPHAFOLD V2.0 PREDICTION FOR SMALL REGULATORY POLYPEPTIDE OF AMINO ACID RESPONSE (A0A1B0GVQ0)	MOL_ID: 1; ORGANISM_SCIENTIFIC: HOMO SAPIENS; ORGANISM_TAXID: 9606	01-JUL-21	12-OCT-21	n/a	9635.7	0.738	7.96	0.08	0.829	0.0011	2.69	0.0036	17.5	0.28	34.6	13.32	3.82	2.58	44.9	0	68.57	1.28625
Q5JU67-F1	AF-Q5JU67-F1-model_v1	ALPHAFOLD V2.0 PREDICTION FOR CILIA- AND FLAGELLA-ASSOCIATED PROTEIN 157 (Q5JU67)	MOL_ID: 1; ORGANISM_SCIENTIFIC: HOMO SAPIENS; ORGANISM_TAXID: 9606	01-JUL-21	12-OCT-21	n/a	60551.5	0.739	3.49	0.035	2.27	0.0028	6.15	0.0075	31.1	0.49	79.1	28.17	9.19	7.24	73.4	0	77.62	1.28618
Q8IUC0-F1	AF-Q8IUC0-F1-model_v1	ALPHAFOLD V2.0 PREDICTION FOR KERATIN-ASSOCIATED PROTEIN 13-1 (Q8IUC0)	MOL_ID: 1; ORGANISM_SCIENTIFIC: HOMO SAPIENS; ORGANISM_TAXID: 9606	01-JUL-21	12-OCT-21	n/a	18329.4	0.698	4.47	0.045	1.02	0.0012	4.79	0.0056	44.8	0.7	61.6	17.97	13.37	6.01	0	0	46.94	1.28601
C6T031-F1	AF-C6T031-F1-model_v1	ALPHAFOLD V2.0 PREDICTION FOR UNCHARACTERIZED PROTEIN (C6T031)	MOL_ID: 1; ORGANISM_SCIENTIFIC: GLYCINE MAX; ORGANISM_TAXID: 3847	01-JUL-21	12-OCT-21	n/a	9409	0.721	8.49	0.086	0.919	0.0011	2.52	0.003	14.3	0.22	32.4	11.6	4.79	2.33	76.6	0	66.99	1.28571
Q96JP9-F1	AF-Q96JP9-F1-model_v1	ALPHAFOLD V2.0 PREDICTION FOR CADHERIN-RELATED FAMILY MEMBER 1 (Q96JP9)	MOL_ID: 1; ORGANISM_SCIENTIFIC: HOMO SAPIENS; ORGANISM_TAXID: 9606	01-JUL-21	12-OCT-21	1-19	91417.7	0.736	3.36	0.034	3.34	0.0042	6.38	0.008	22.6	0.36	82	29.22	12.11	9.47	9.5	27.6	80.34	1.28527
P0CH01-F1	AF-P0CH01-F1-model_v1	ALPHAFOLD V2.0 PREDICTION FOR PUTATIVE RING-H2 FINGER PROTEIN ATL21A (P0CH01)	MOL_ID: 1; ORGANISM_SCIENTIFIC: ARABIDOPSIS THALIANA; ORGANISM_TAXID: 3702	01-JUL-21	12-OCT-21	1-20	39125.8	0.734	5.66	0.057	2.43	0.0029	3.79	0.0045	11.2	0.18	48.7	15.61	5.72	4.32	24.8	18.2	83.68	1.28496
Q24564-F1	AF-Q24564-F1-model_v1	ALPHAFOLD V2.0 PREDICTION FOR MOESIN/EZRIN/RADIXIN HOMOLOG 2 (Q24564)	MOL_ID: 1; ORGANISM_SCIENTIFIC: DROSOPHILA MELANOGASTER; ORGANISM_TAXID: 7227	01-JUL-21	12-OCT-21	n/a	74497.4	0.73	3.89	0.039	3.23	0.0043	5.51	0.0074	21	0.33	70.8	27.07	9.15	5.95	51.4	8.7	83.07	1.28494
Q7T3H0-F1	AF-Q7T3H0-F1-model_v1	ALPHAFOLD V2.0 PREDICTION FOR TRANSCRIPTION FACTOR MAFT (Q7T3H0)	MOL_ID: 1; ORGANISM_SCIENTIFIC: DANIO RERIO; ORGANISM_TAXID: 7955	01-JUL-21	12-OCT-21	n/a	17575.5	0.732	6.23	0.063	1.21	0.0016	3.44	0.0044	19.9	0.32	44.2	16.8	5.62	3.82	56	0	81.95	1.28488
A0A0R0FP12-F1	AF-A0A0R0FP12-F1-model_v1	ALPHAFOLD V2.0 PREDICTION FOR RING-TYPE DOMAIN-CONTAINING PROTEIN (A0A0R0FP12)	MOL_ID: 1; ORGANISM_SCIENTIFIC: GLYCINE MAX; ORGANISM_TAXID: 3847	01-JUL-21	12-OCT-21	n/a	75724	0.732	3.15	0.032	2.63	0.0036	6.81	0.0092	38.1	0.61	87.5	36.97	10.55	6.87	54.7	1.3	72.59	1.28488
Q9UBC9-F1	AF-Q9UBC9-F1-model_v1	ALPHAFOLD V2.0 PREDICTION FOR SMALL PROLINE-RICH PROTEIN 3 (Q9UBC9)	MOL_ID: 1; ORGANISM_SCIENTIFIC: HOMO SAPIENS; ORGANISM_TAXID: 9606	01-JUL-21	12-OCT-21	n/a	18162.6	0.737	4.96	0.05	0.977	0.0012	4.32	0.0053	35.4	0.55	55.5	18.89	8.44	5.57	0	0	52.7	1.28472
K7LT08-F1	AF-K7LT08-F1-model_v1	ALPHAFOLD V2.0 PREDICTION FOR BZIP DOMAIN-CONTAINING PROTEIN (K7LT08)	MOL_ID: 1; ORGANISM_SCIENTIFIC: GLYCINE MAX; ORGANISM_TAXID: 3847	01-JUL-21	12-OCT-21	n/a	12097.5	0.727	7.63	0.077	1.04	0.0013	2.81	0.0035	14.8	0.23	36.1	12.18	4.86	2.93	84.8	0	89.6	1.2847
A0A0R0L7G1-F1	AF-A0A0R0L7G1-F1-model_v1	ALPHAFOLD V2.0 PREDICTION FOR UNCHARACTERIZED PROTEIN (A0A0R0L7G1)	MOL_ID: 1; ORGANISM_SCIENTIFIC: GLYCINE MAX; ORGANISM_TAXID: 3847	01-JUL-21	12-OCT-21	n/a	26168.2	0.739	5.81	0.059	1.64	0.002	3.69	0.0044	15	0.23	47.4	15.44	6.76	3.62	82.6	0	87.22	1.28455
Q59VC6-F1	AF-Q59VC6-F1-model_v1	ALPHAFOLD V2.0 PREDICTION FOR DASH COMPLEX SUBUNIT DAD2 (Q59VC6)	MOL_ID: 1; ORGANISM_SCIENTIFIC: CANDIDA ALBICANS (STRAIN SC5314 / ATCC MYA-2876); ORGANISM_TAXID: 237561	01-JUL-21	12-OCT-21	n/a	15450	0.722	6.7	0.067	1.19	0.0015	3.2	0.004	17.4	0.27	41.1	13.96	5.2	4.53	56.9	0	70.3	1.28438
A0A0P0W911-F1	AF-A0A0P0W911-F1-model_v1	ALPHAFOLD V2.0 PREDICTION FOR OS04G0312733 PROTEIN (A0A0P0W911)	MOL_ID: 1; ORGANISM_SCIENTIFIC: ORYZA SATIVA SUBSP. JAPONICA; ORGANISM_TAXID: 39947	01-JUL-21	12-OCT-21	n/a	8360.7	0.729	8.11	0.082	0.758	0.00095	2.64	0.0033	17.9	0.28	33.9	12.46	3.76	3.35	4	0	59.47	1.28409
Q5SYH2-F1	AF-Q5SYH2-F1-model_v1	ALPHAFOLD V2.0 PREDICTION FOR TRANSMEMBRANE PROTEIN 199 (Q5SYH2)	MOL_ID: 1; ORGANISM_SCIENTIFIC: MUS MUSCULUS; ORGANISM_TAXID: 10090	01-JUL-21	12-OCT-21	n/a	23108.5	0.748	6.48	0.065	1.56	0.0018	3.31	0.0039	12.1	0.19	42.5	13.88	6.56	4.75	63.3	2.9	80.48	1.28399
Q54YP0-F1	AF-Q54YP0-F1-model_v1	ALPHAFOLD V2.0 PREDICTION FOR UNCHARACTERIZED PROTEIN (Q54YP0)	MOL_ID: 1; ORGANISM_SCIENTIFIC: DICTYOSTELIUM DISCOIDEUM; ORGANISM_TAXID: 44689	01-JUL-21	12-OCT-21	1-20	97239.7	0.705	3.31	0.033	3.91	0.0051	6.48	0.0084	24.3	0.38	83.2	31.57	11.74	6.36	4.1	31.4	73.24	1.28395
A0A0R0F5P3-F1	AF-A0A0R0F5P3-F1-model_v1	ALPHAFOLD V2.0 PREDICTION FOR UNCHARACTERIZED PROTEIN (A0A0R0F5P3)	MOL_ID: 1; ORGANISM_SCIENTIFIC: GLYCINE MAX; ORGANISM_TAXID: 3847	01-JUL-21	12-OCT-21	n/a	6623.6	0.739	10.3	0.1	0.734	0.00092	2.08	0.0026	11.6	0.18	26.7	9.94	3.05	2.24	67.9	0	58.29	1.28365
Q9Y5H4-F1	AF-Q9Y5H4-F1-model_v1	ALPHAFOLD V2.0 PREDICTION FOR PROTOCADHERIN GAMMA-A1 (Q9Y5H4)	MOL_ID: 1; ORGANISM_SCIENTIFIC: HOMO SAPIENS; ORGANISM_TAXID: 9606	01-JUL-21	12-OCT-21	1-28	98141	0.732	3.26	0.033	3.54	0.0044	6.56	0.0081	23.3	0.37	84.2	29.46	10.86	9.13	9.2	25.5	75.64	1.28354
Q9VV23-F1	AF-Q9VV23-F1-model_v1	ALPHAFOLD V2.0 PREDICTION FOR LP19160P (Q9VV23)	MOL_ID: 1; ORGANISM_SCIENTIFIC: DROSOPHILA MELANOGASTER; ORGANISM_TAXID: 7227	01-JUL-21	12-OCT-21	1-16	14005.7	0.753	6.67	0.067	0.951	0.0013	3.21	0.0043	21.5	0.34	41.2	16.07	5.34	3.11	0	30.4	57.93	1.28349
Q8I0K8-F1	AF-Q8I0K8-F1-model_v1	ALPHAFOLD V2.0 PREDICTION FOR HEMESE, ISOFORM B (Q8I0K8)	MOL_ID: 1; ORGANISM_SCIENTIFIC: DROSOPHILA MELANOGASTER; ORGANISM_TAXID: 7227	01-JUL-21	12-OCT-21	1-21	15118.7	0.721	5.73	0.058	0.997	0.0013	3.74	0.0048	28.6	0.45	48	16.46	7.39	5.98	20.9	0	55.95	1.28342
A0A131MBH4-F1	AF-A0A131MBH4-F1-model_v1	ALPHAFOLD V2.0 PREDICTION FOR UNCHARACTERIZED PROTEIN (A0A131MBH4)	MOL_ID: 1; ORGANISM_SCIENTIFIC: CAENORHABDITIS ELEGANS; ORGANISM_TAXID: 6239	01-JUL-21	12-OCT-21	n/a	11222.5	0.734	7.68	0.077	0.946	0.0012	2.79	0.0035	16.1	0.25	35.8	13.17	4.95	2.48	57.3	0	61.83	1.28315
A0A0R4IGZ7-F1	AF-A0A0R4IGZ7-F1-model_v1	ALPHAFOLD V2.0 PREDICTION FOR SI:DKEY-226N24.1 (A0A0R4IGZ7)	MOL_ID: 1; ORGANISM_SCIENTIFIC: DANIO RERIO; ORGANISM_TAXID: 7955	01-JUL-21	12-OCT-21	n/a	5853.8	0.723	10.4	0.11	0.697	0.00092	2.05	0.0027	13.3	0.21	26.3	10.41	2.53	2.05	68.5	0	56.26	1.28293
A0ZSE6-F1	AF-A0ZSE6-F1-model_v1	ALPHAFOLD V2.0 PREDICTION FOR CELL CYCLE CONTROL PROTEIN 50C (A0ZSE6)	MOL_ID: 1; ORGANISM_SCIENTIFIC: HOMO SAPIENS; ORGANISM_TAXID: 9606	01-JUL-21	12-OCT-21	n/a	13039.8	0.74	7.23	0.073	1.01	0.0013	2.97	0.0038	16.9	0.27	38.1	13.16	5.4	3.92	40.2	0	78.03	1.28283
B9F2D2-F1	AF-B9F2D2-F1-model_v1	ALPHAFOLD V2.0 PREDICTION FOR OS02G0716100 PROTEIN (B9F2D2)	MOL_ID: 1; ORGANISM_SCIENTIFIC: ORYZA SATIVA SUBSP. JAPONICA; ORGANISM_TAXID: 39947	01-JUL-21	12-OCT-21	n/a	6107.3	0.758	11.2	0.11	0.686	0.00087	1.91	0.0024	9.67	0.15	24.5	9.2	2.33	1.84	96.3	0	84.62	1.28272
A4IBN9-F1	AF-A4IBN9-F1-model_v1	ALPHAFOLD V2.0 PREDICTION FOR HYPOTHETICAL_PROTEIN_-_CONSERVED (A4IBN9)	MOL_ID: 1; ORGANISM_SCIENTIFIC: LEISHMANIA INFANTUM; ORGANISM_TAXID: 5671	01-JUL-21	12-OCT-21	n/a	49773.9	0.72	3.99	0.04	2.29	0.0028	5.38	0.0065	24.4	0.38	69	22.25	9.99	6.43	53.4	0.9	75.99	1.28253
Q4DGL7-F1	AF-Q4DGL7-F1-model_v1	ALPHAFOLD V2.0 PREDICTION FOR UNCHARACTERIZED PROTEIN (Q4DGL7)	MOL_ID: 1; ORGANISM_SCIENTIFIC: TRYPANOSOMA CRUZI (STRAIN CL BRENER); ORGANISM_TAXID: 353153	01-JUL-21	12-OCT-21	n/a	22970.7	0.731	5.36	0.054	1.36	0.0016	4	0.0047	21.3	0.33	51.3	14	10.32	4.6	65.5	2	77.06	1.2825
Q9LFP2-F1	AF-Q9LFP2-F1-model_v1	ALPHAFOLD V2.0 PREDICTION FOR PHOSPHOLIPASE-LIKE PROTEIN (PEARLI 4) FAMILY PROTEIN (Q9LFP2)	MOL_ID: 1; ORGANISM_SCIENTIFIC: ARABIDOPSIS THALIANA; ORGANISM_TAXID: 3702	01-JUL-21	12-OCT-21	n/a	27620.9	0.745	5.45	0.055	1.58	0.002	3.93	0.0049	18.5	0.29	50.4	17.81	7.28	6.88	60	2.5	82.98	1.28244
A6NGY3-F1	AF-A6NGY3-F1-model_v1	ALPHAFOLD V2.0 PREDICTION FOR UNCHARACTERIZED PROTEIN C5ORF52 (A6NGY3)	MOL_ID: 1; ORGANISM_SCIENTIFIC: HOMO SAPIENS; ORGANISM_TAXID: 9606	01-JUL-21	12-OCT-21	n/a	17925.2	0.729	6.17	0.062	1.24	0.0015	3.47	0.0043	19	0.3	44.5	14.9	7.45	4.99	46.2	0	72.9	1.28242
A0A0P0UYV4-F1	AF-A0A0P0UYV4-F1-model_v1	ALPHAFOLD V2.0 PREDICTION FOR OS01G0181033 PROTEIN (A0A0P0UYV4)	MOL_ID: 1; ORGANISM_SCIENTIFIC: ORYZA SATIVA SUBSP. JAPONICA; ORGANISM_TAXID: 39947	01-JUL-21	12-OCT-21	n/a	6792.1	0.729	10.3	0.1	0.778	0.00099	2.09	0.0026	11.4	0.18	26.8	9.86	2.52	2.28	80.7	0	67.67	1.2823
Q6Z7L9-F1	AF-Q6Z7L9-F1-model_v1	ALPHAFOLD V2.0 PREDICTION FOR OS02G0312500 PROTEIN (Q6Z7L9)	MOL_ID: 1; ORGANISM_SCIENTIFIC: ORYZA SATIVA SUBSP. JAPONICA; ORGANISM_TAXID: 39947	01-JUL-21	12-OCT-21	n/a	18593.2	0.742	6.57	0.066	1.3	0.0016	3.26	0.0041	15.5	0.24	41.8	13.73	5.16	4.97	80	0	85.48	1.28221
P41219-F1	AF-P41219-F1-model_v1	ALPHAFOLD V2.0 PREDICTION FOR PERIPHERIN (P41219)	MOL_ID: 1; ORGANISM_SCIENTIFIC: HOMO SAPIENS; ORGANISM_TAXID: 9606	01-JUL-21	12-OCT-21	n/a	53646.2	0.727	3.83	0.039	2.31	0.003	5.6	0.0072	27	0.43	71.8	27.19	8.71	5.72	69.5	4	78.14	1.28214
Q8BJN4-F1	AF-Q8BJN4-F1-model_v1	ALPHAFOLD V2.0 PREDICTION FOR FIBRONECTIN TYPE III DOMAIN-CONTAINING PROTEIN 9 (Q8BJN4)	MOL_ID: 1; ORGANISM_SCIENTIFIC: MUS MUSCULUS; ORGANISM_TAXID: 10090	01-JUL-21	12-OCT-21	n/a	25650.1	0.736	5.39	0.054	1.51	0.0018	3.97	0.0048	19.4	0.3	50.9	17.27	6.39	5.47	14.7	15.1	66.51	1.28212
Q4D4V7-F1	AF-Q4D4V7-F1-model_v1	ALPHAFOLD V2.0 PREDICTION FOR UNCHARACTERIZED PROTEIN (Q4D4V7)	MOL_ID: 1; ORGANISM_SCIENTIFIC: TRYPANOSOMA CRUZI (STRAIN CL BRENER); ORGANISM_TAXID: 353153	01-JUL-21	12-OCT-21	n/a	54340.8	0.717	3.37	0.034	2.14	0.0029	6.35	0.0086	40.1	0.64	81.4	33.81	10.12	10.22	72.5	0	76.74	1.28189
Q4DW57-F1	AF-Q4DW57-F1-model_v1	ALPHAFOLD V2.0 PREDICTION FOR UNCHARACTERIZED PROTEIN (Q4DW57)	MOL_ID: 1; ORGANISM_SCIENTIFIC: TRYPANOSOMA CRUZI (STRAIN CL BRENER); ORGANISM_TAXID: 353153	01-JUL-21	12-OCT-21	n/a	82897.2	0.734	3.84	0.039	3.49	0.0042	5.58	0.0068	16.6	0.26	71.5	22.72	9.73	7.36	29	14.5	79.61	1.28136
Q63772-F1	AF-Q63772-F1-model_v1	ALPHAFOLD V2.0 PREDICTION FOR GROWTH ARREST-SPECIFIC PROTEIN 6 (Q63772)	MOL_ID: 1; ORGANISM_SCIENTIFIC: RATTUS NORVEGICUS; ORGANISM_TAXID: 10116	01-JUL-21	12-OCT-21	1-27	71967.6	0.726	4.4	0.044	3.58	0.0045	4.87	0.0061	14	0.22	62.4	22.32	7.19	6.57	15.3	28	88.41	1.28131
Q6IMF1-F1	AF-Q6IMF1-F1-model_v1	ALPHAFOLD V2.0 PREDICTION FOR KERATIN, TYPE II CYTOSKELETAL 80 (Q6IMF1)	MOL_ID: 1; ORGANISM_SCIENTIFIC: RATTUS NORVEGICUS; ORGANISM_TAXID: 10116	01-JUL-21	12-OCT-21	n/a	50554.2	0.733	3.68	0.037	2.05	0.0026	5.83	0.0075	32.8	0.52	74.7	28.4	10.49	7.54	67.4	0	75.81	1.2813
I1LBY6-F1	AF-I1LBY6-F1-model_v1	ALPHAFOLD V2.0 PREDICTION FOR UBX DOMAIN-CONTAINING PROTEIN (I1LBY6)	MOL_ID: 1; ORGANISM_SCIENTIFIC: GLYCINE MAX; ORGANISM_TAXID: 3847	01-JUL-21	12-OCT-21	n/a	50584.9	0.73	4.67	0.047	2.63	0.003	4.59	0.0052	14.6	0.23	58.8	18.61	8.32	8.07	43.8	10.8	77.4	1.28105
Q9VM45-F1	AF-Q9VM45-F1-model_v1	ALPHAFOLD V2.0 PREDICTION FOR NUF2 (Q9VM45)	MOL_ID: 1; ORGANISM_SCIENTIFIC: DROSOPHILA MELANOGASTER; ORGANISM_TAXID: 7227	01-JUL-21	12-OCT-21	n/a	45706.1	0.739	4.43	0.045	2.18	0.0028	4.84	0.0063	21.1	0.33	62	23.95	7.71	4.87	86	0	84.87	1.28099
A0A0U1RRN3-F1	AF-A0A0U1RRN3-F1-model_v1	ALPHAFOLD V2.0 PREDICTION FOR PUTATIVE TRANSMEMBRANE PROTEIN SPTY2D1OS (A0A0U1RRN3)	MOL_ID: 1; ORGANISM_SCIENTIFIC: HOMO SAPIENS; ORGANISM_TAXID: 9606	01-JUL-21	12-OCT-21	n/a	6978.4	0.748	10.2	0.1	0.739	0.00093	2.1	0.0026	10.9	0.17	26.9	9.73	2.89	2.23	67.2	0	68.28	1.28095
Q54YL5-F1	AF-Q54YL5-F1-model_v1	ALPHAFOLD V2.0 PREDICTION FOR UNCHARACTERIZED PROTEIN (Q54YL5)	MOL_ID: 1; ORGANISM_SCIENTIFIC: DICTYOSTELIUM DISCOIDEUM; ORGANISM_TAXID: 44689	01-JUL-21	12-OCT-21	n/a	7863.8	0.798	10.6	0.11	0.693	0.00087	2.03	0.0026	9.08	0.14	26	9.63	2.05	1.83	96.6	0	97.79	1.28079
Q4DLF3-F1	AF-Q4DLF3-F1-model_v1	ALPHAFOLD V2.0 PREDICTION FOR UNCHARACTERIZED PROTEIN (Q4DLF3)	MOL_ID: 1; ORGANISM_SCIENTIFIC: TRYPANOSOMA CRUZI (STRAIN CL BRENER); ORGANISM_TAXID: 353153	01-JUL-21	12-OCT-21	n/a	57923	0.734	3.76	0.038	2.39	0.0031	5.7	0.0074	27.1	0.43	73	28.99	11.34	5.93	77.6	0	69.54	1.2807
Q9ULX9-F1	AF-Q9ULX9-F1-model_v1	ALPHAFOLD V2.0 PREDICTION FOR TRANSCRIPTION FACTOR MAFF (Q9ULX9)	MOL_ID: 1; ORGANISM_SCIENTIFIC: HOMO SAPIENS; ORGANISM_TAXID: 9606	01-JUL-21	12-OCT-21	n/a	17774.2	0.734	6.4	0.065	1.25	0.0016	3.35	0.0042	17.7	0.28	42.9	16.21	5.27	3.21	64.4	0	82.13	1.2806
B6VAM9-F1	AF-B6VAM9-F1-model_v1	ALPHAFOLD V2.0 PREDICTION FOR SPERMATOGENESIS-ASSOCIATED 17 (B6VAM9)	MOL_ID: 1; ORGANISM_SCIENTIFIC: DANIO RERIO; ORGANISM_TAXID: 7955	01-JUL-21	12-OCT-21	n/a	43060.7	0.738	4.26	0.043	1.98	0.0026	5.03	0.0066	25.3	0.4	64.4	25.49	7.69	5.58	56.5	0	82.22	1.28032
I1LFE8-F1	AF-I1LFE8-F1-model_v1	ALPHAFOLD V2.0 PREDICTION FOR ANK_REP_REGION DOMAIN-CONTAINING PROTEIN (I1LFE8)	MOL_ID: 1; ORGANISM_SCIENTIFIC: GLYCINE MAX; ORGANISM_TAXID: 3847	01-JUL-21	12-OCT-21	n/a	64125.9	0.74	4.32	0.044	2.97	0.0037	4.96	0.0062	15.2	0.24	63.5	21.42	7.35	7.43	58.7	0	80.65	1.28024
A0A0P0XRP3-F1	AF-A0A0P0XRP3-F1-model_v1	ALPHAFOLD V2.0 PREDICTION FOR OS10G0147732 PROTEIN (A0A0P0XRP3)	MOL_ID: 1; ORGANISM_SCIENTIFIC: ORYZA SATIVA SUBSP. JAPONICA; ORGANISM_TAXID: 39947	01-JUL-21	12-OCT-21	n/a	10723.1	0.728	8.32	0.084	1	0.0013	2.57	0.0033	13.4	0.21	32.9	12.18	4.15	2.4	75.5	0	58.4	1.28016
Q55F64-F1	AF-Q55F64-F1-model_v1	ALPHAFOLD V2.0 PREDICTION FOR UNCHARACTERIZED PROTEIN (Q55F64)	MOL_ID: 1; ORGANISM_SCIENTIFIC: DICTYOSTELIUM DISCOIDEUM; ORGANISM_TAXID: 44689	01-JUL-21	12-OCT-21	n/a	11650.6	0.723	6.99	0.07	0.93	0.0012	3.07	0.0039	20.7	0.33	39.3	14.95	5.23	3.8	33	0	57.46	1.28013
Q9VCZ7-F1	AF-Q9VCZ7-F1-model_v1	ALPHAFOLD V2.0 PREDICTION FOR UNCHARACTERIZED PROTEIN (Q9VCZ7)	MOL_ID: 1; ORGANISM_SCIENTIFIC: DROSOPHILA MELANOGASTER; ORGANISM_TAXID: 7227	01-JUL-21	12-OCT-21	n/a	26303.4	0.738	5.26	0.053	1.5	0.0019	4.07	0.0052	21.3	0.34	52.1	19.89	7.23	4.71	81.1	0	85.54	1.2801
Q9CZ83-F1	AF-Q9CZ83-F1-model_v1	ALPHAFOLD V2.0 PREDICTION FOR 39S RIBOSOMAL PROTEIN L55, MITOCHONDRIAL (Q9CZ83)	MOL_ID: 1; ORGANISM_SCIENTIFIC: MUS MUSCULUS; ORGANISM_TAXID: 10090	01-JUL-21	12-OCT-21	n/a	15137	0.737	6.38	0.064	1.05	0.0014	3.36	0.0045	22	0.35	43	16.87	6.3	4.67	24.6	9.5	81.36	1.27976
Q58A94-F1	AF-Q58A94-F1-model_v1	ALPHAFOLD V2.0 PREDICTION FOR UNCHARACTERIZED PROTEIN (Q58A94)	MOL_ID: 1; ORGANISM_SCIENTIFIC: CAENORHABDITIS ELEGANS; ORGANISM_TAXID: 6239	01-JUL-21	12-OCT-21	1-18	18940.6	0.743	6.18	0.062	1.24	0.0016	3.47	0.0045	19.2	0.3	44.4	16.45	5.82	4.13	30.3	6.1	53.96	1.27954
A0A0P0XF25-F1	AF-A0A0P0XF25-F1-model_v1	ALPHAFOLD V2.0 PREDICTION FOR OS08G0350950 PROTEIN (A0A0P0XF25)	MOL_ID: 1; ORGANISM_SCIENTIFIC: ORYZA SATIVA SUBSP. JAPONICA; ORGANISM_TAXID: 39947	01-JUL-21	12-OCT-21	n/a	12187.2	0.714	6.18	0.062	0.887	0.0012	3.47	0.0046	29.4	0.47	44.4	17.48	5.48	5.04	1.7	0	53.55	1.27954
A0A0P0UZ32-F1	AF-A0A0P0UZ32-F1-model_v1	ALPHAFOLD V2.0 PREDICTION FOR OS01G0185250 PROTEIN (A0A0P0UZ32)	MOL_ID: 1; ORGANISM_SCIENTIFIC: ORYZA SATIVA SUBSP. JAPONICA; ORGANISM_TAXID: 39947	01-JUL-21	12-OCT-21	n/a	7798.3	0.738	8.45	0.085	0.712	0.00092	2.54	0.0033	16.7	0.26	32.5	10.89	5.19	4.12	9.6	0	50.19	1.27953
D4A9E1-F1	AF-D4A9E1-F1-model_v1	ALPHAFOLD V2.0 PREDICTION FOR HEAT SHOCK FACTOR-BINDING PROTEIN 1-LIKE PROTEIN 1 (D4A9E1)	MOL_ID: 1; ORGANISM_SCIENTIFIC: RATTUS NORVEGICUS; ORGANISM_TAXID: 10116	01-JUL-21	12-OCT-21	n/a	8048.2	0.723	9.36	0.094	0.86	0.0011	2.29	0.003	12.9	0.2	29.3	10.72	3.35	2.14	70.4	0	87.15	1.27948
A0A0R0E3U2-F1	AF-A0A0R0E3U2-F1-model_v1	ALPHAFOLD V2.0 PREDICTION FOR UNCHARACTERIZED PROTEIN (A0A0R0E3U2)	MOL_ID: 1; ORGANISM_SCIENTIFIC: GLYCINE MAX; ORGANISM_TAXID: 3847	01-JUL-21	12-OCT-21	n/a	6921.4	0.752	10.5	0.11	0.744	0.00094	2.04	0.0026	10.4	0.16	26.1	9.7	2.24	2.12	96.6	0	75.12	1.27941
B2RPU2-F1	AF-B2RPU2-F1-model_v1	ALPHAFOLD V2.0 PREDICTION FOR PLECKSTRIN HOMOLOGY DOMAIN-CONTAINING FAMILY D MEMBER 1 (B2RPU2)	MOL_ID: 1; ORGANISM_SCIENTIFIC: MUS MUSCULUS; ORGANISM_TAXID: 10090	01-JUL-21	12-OCT-21	n/a	59102.4	0.731	4.1	0.041	2.69	0.0034	5.23	0.0066	19.7	0.31	66.9	23.97	10.08	7.23	68.8	6.3	81.9	1.27916
O16794-F1	AF-O16794-F1-model_v1	ALPHAFOLD V2.0 PREDICTION FOR UNCHARACTERIZED PROTEIN (O16794)	MOL_ID: 1; ORGANISM_SCIENTIFIC: CAENORHABDITIS ELEGANS; ORGANISM_TAXID: 6239	01-JUL-21	12-OCT-21	n/a	17686	0.739	5.29	0.053	1.01	0.0013	4.05	0.0053	32.7	0.52	51.8	19.17	8.65	7.11	18	0	57	1.27901
Q4CR07-F1	AF-Q4CR07-F1-model_v1	ALPHAFOLD V2.0 PREDICTION FOR UNCHARACTERIZED PROTEIN (Q4CR07)	MOL_ID: 1; ORGANISM_SCIENTIFIC: TRYPANOSOMA CRUZI (STRAIN CL BRENER); ORGANISM_TAXID: 353153	01-JUL-21	12-OCT-21	n/a	28247.4	0.726	5.06	0.051	1.62	0.0021	4.23	0.0054	22.8	0.36	54.1	20.32	7.59	5.58	56	3.3	63.9	1.27896
K7MLZ9-F1	AF-K7MLZ9-F1-model_v1	ALPHAFOLD V2.0 PREDICTION FOR UNCHARACTERIZED PROTEIN (K7MLZ9)	MOL_ID: 1; ORGANISM_SCIENTIFIC: GLYCINE MAX; ORGANISM_TAXID: 3847	01-JUL-21	12-OCT-21	n/a	7849.6	0.741	9.49	0.096	0.795	0.001	2.26	0.0029	12.6	0.2	28.9	10.66	2.96	2.41	80.9	0	78.41	1.27876
A0A494C0I6-F1	AF-A0A494C0I6-F1-model_v1	ALPHAFOLD V2.0 PREDICTION FOR UNCHARACTERIZED PROTEIN (A0A494C0I6)	MOL_ID: 1; ORGANISM_SCIENTIFIC: HOMO SAPIENS; ORGANISM_TAXID: 9606	01-JUL-21	12-OCT-21	n/a	8410.5	0.746	9.5	0.096	0.837	0.0011	2.26	0.0029	11.7	0.18	28.9	11.03	2.3	2.44	92.4	0	87.88	1.27876
Q4CXI4-F1	AF-Q4CXI4-F1-model_v1	ALPHAFOLD V2.0 PREDICTION FOR AN1-TYPE DOMAIN-CONTAINING PROTEIN (Q4CXI4)	MOL_ID: 1; ORGANISM_SCIENTIFIC: TRYPANOSOMA CRUZI (STRAIN CL BRENER); ORGANISM_TAXID: 353153	01-JUL-21	12-OCT-21	n/a	10695.3	0.725	8.79	0.089	1.07	0.0013	2.44	0.003	11.2	0.18	31.2	10.92	3.07	2.6	58.5	4.3	89.08	1.27869
A0A1D6GZA5-F1	AF-A0A1D6GZA5-F1-model_v1	ALPHAFOLD V2.0 PREDICTION FOR 65-KDA MICROTUBULE-ASSOCIATED PROTEIN 3 (A0A1D6GZA5)	MOL_ID: 1; ORGANISM_SCIENTIFIC: ZEA MAYS; ORGANISM_TAXID: 4577	01-JUL-21	12-OCT-21	n/a	67997.8	0.73	3.71	0.037	2.81	0.0036	5.78	0.0075	24.1	0.38	73.9	28.28	8.55	6.23	63.4	0	73.87	1.27855
A0A1D6L673-F1	AF-A0A1D6L673-F1-model_v1	ALPHAFOLD V2.0 PREDICTION FOR EXOCYST COMPLEX COMPONENT SEC15A (A0A1D6L673)	MOL_ID: 1; ORGANISM_SCIENTIFIC: ZEA MAYS; ORGANISM_TAXID: 4577	01-JUL-21	12-OCT-21	n/a	66230.1	0.74	4.26	0.043	3.03	0.0038	5.03	0.0064	16.5	0.26	64.3	23.59	8.96	5.31	65.1	0	65.95	1.27833
Q5VZ72-F1	AF-Q5VZ72-F1-model_v1	ALPHAFOLD V2.0 PREDICTION FOR IZUMO SPERM-EGG FUSION PROTEIN 3 (Q5VZ72)	MOL_ID: 1; ORGANISM_SCIENTIFIC: HOMO SAPIENS; ORGANISM_TAXID: 9606	01-JUL-21	12-OCT-21	1-20	25572.9	0.75	6.33	0.064	1.67	0.0021	3.38	0.0043	13.3	0.21	43.2	15.06	6.12	3.31	71.6	2.8	88.4	1.27811
Q0J1C5-F1	AF-Q0J1C5-F1-model_v1	ALPHAFOLD V2.0 PREDICTION FOR OS09G0450300 PROTEIN (Q0J1C5)	MOL_ID: 1; ORGANISM_SCIENTIFIC: ORYZA SATIVA SUBSP. JAPONICA; ORGANISM_TAXID: 39947	01-JUL-21	12-OCT-21	n/a	67344.9	0.733	3.7	0.037	2.74	0.0036	5.79	0.0077	25.5	0.4	74	28.01	11.32	6.33	62.5	0	76.89	1.27807
Q8NFT8-F1	AF-Q8NFT8-F1-model_v1	ALPHAFOLD V2.0 PREDICTION FOR DELTA AND NOTCH-LIKE EPIDERMAL GROWTH FACTOR-RELATED RECEPTOR (Q8NFT8)	MOL_ID: 1; ORGANISM_SCIENTIFIC: HOMO SAPIENS; ORGANISM_TAXID: 9606	01-JUL-21	12-OCT-21	1-34	74992.6	0.718	3.56	0.036	3.11	0.0038	6.01	0.0074	22.7	0.36	76.8	26.11	9.55	10.22	8.8	17.4	71.73	1.27787
P0AA53-F1	AF-P0AA53-F1-model_v1	ALPHAFOLD V2.0 PREDICTION FOR PROTEIN QMCA (P0AA53)	MOL_ID: 1; ORGANISM_SCIENTIFIC: ESCHERICHIA COLI (STRAIN K12); ORGANISM_TAXID: 83333	01-JUL-21	12-OCT-21	n/a	33746.2	0.745	4.96	0.05	1.76	0.0022	4.32	0.0055	20.4	0.32	55.2	19.05	8.87	5.52	59.2	15.8	87.29	1.27778
Q52LG2-F1	AF-Q52LG2-F1-model_v1	ALPHAFOLD V2.0 PREDICTION FOR KERATIN-ASSOCIATED PROTEIN 13-2 (Q52LG2)	MOL_ID: 1; ORGANISM_SCIENTIFIC: HOMO SAPIENS; ORGANISM_TAXID: 9606	01-JUL-21	12-OCT-21	n/a	18735.8	0.701	4.41	0.044	1.02	0.0011	4.86	0.0054	45.1	0.7	62.1	17.53	14.76	3.64	0	0	46.53	1.27778
Q9Y264-F1	AF-Q9Y264-F1-model_v1	ALPHAFOLD V2.0 PREDICTION FOR ANGIOPOIETIN-4 (Q9Y264)	MOL_ID: 1; ORGANISM_SCIENTIFIC: HOMO SAPIENS; ORGANISM_TAXID: 9606	01-JUL-21	12-OCT-21	1-24	54349.2	0.728	4.02	0.041	2.45	0.0033	5.33	0.0071	24.6	0.39	68.1	27.6	7.2	6.34	44.8	8.4	83.02	1.27767
Q9UHQ7-F1	AF-Q9UHQ7-F1-model_v1	ALPHAFOLD V2.0 PREDICTION FOR TRANSCRIPTION ELONGATION FACTOR A PROTEIN-LIKE 9 (Q9UHQ7)	MOL_ID: 1; ORGANISM_SCIENTIFIC: HOMO SAPIENS; ORGANISM_TAXID: 9606	01-JUL-21	12-OCT-21	n/a	12746.1	0.725	6.76	0.068	0.977	0.0012	3.17	0.0039	19.7	0.31	40.5	12.63	6.79	2.54	60.2	0	67.38	1.2776
Q10HX5-F1	AF-Q10HX5-F1-model_v1	ALPHAFOLD V2.0 PREDICTION FOR MODIFIER OF RUDIMENTARY PROTEIN, EXPRESSED (Q10HX5)	MOL_ID: 1; ORGANISM_SCIENTIFIC: ORYZA SATIVA SUBSP. JAPONICA; ORGANISM_TAXID: 39947	01-JUL-21	12-OCT-21	n/a	26392.4	0.73	5.72	0.058	1.68	0.002	3.75	0.0045	15.6	0.24	47.9	17	6.08	5.05	63.2	0	81.05	1.27733
A0A1D8PDP5-F1	AF-A0A1D8PDP5-F1-model_v1	ALPHAFOLD V2.0 PREDICTION FOR UNCHARACTERIZED PROTEIN (A0A1D8PDP5)	MOL_ID: 1; ORGANISM_SCIENTIFIC: CANDIDA ALBICANS (STRAIN SC5314 / ATCC MYA-2876); ORGANISM_TAXID: 237561	01-JUL-21	12-OCT-21	n/a	7829.6	0.731	9.76	0.098	0.847	0.001	2.2	0.0027	11.4	0.18	28.1	9.78	3.39	2.44	66.2	0	77.19	1.27727
A0A0P0VKQ7-F1	AF-A0A0P0VKQ7-F1-model_v1	ALPHAFOLD V2.0 PREDICTION FOR OS02G0576250 PROTEIN (A0A0P0VKQ7)	MOL_ID: 1; ORGANISM_SCIENTIFIC: ORYZA SATIVA SUBSP. JAPONICA; ORGANISM_TAXID: 39947	01-JUL-21	12-OCT-21	n/a	8182.1	0.717	8.02	0.081	0.766	0.00092	2.67	0.0032	19.5	0.3	34.1	10.43	5.78	4.92	52.4	0	59.94	1.27715
K7L5K6-F1	AF-K7L5K6-F1-model_v1	ALPHAFOLD V2.0 PREDICTION FOR UNCHARACTERIZED PROTEIN (K7L5K6)	MOL_ID: 1; ORGANISM_SCIENTIFIC: GLYCINE MAX; ORGANISM_TAXID: 3847	01-JUL-21	12-OCT-21	n/a	14312.6	0.719	6.6	0.066	1.09	0.0014	3.25	0.0042	19.6	0.31	41.5	14.96	4.84	3.07	23.2	0	62.46	1.27692
Q9Y5H2-F1	AF-Q9Y5H2-F1-model_v1	ALPHAFOLD V2.0 PREDICTION FOR PROTOCADHERIN GAMMA-A11 (Q9Y5H2)	MOL_ID: 1; ORGANISM_SCIENTIFIC: HOMO SAPIENS; ORGANISM_TAXID: 9606	01-JUL-21	12-OCT-21	1-29	98172.2	0.732	3.28	0.033	3.55	0.0044	6.54	0.0081	22.8	0.36	83.5	29.36	11.43	9.36	8.8	25	75.95	1.27676
I1L8H3-F1	AF-I1L8H3-F1-model_v1	ALPHAFOLD V2.0 PREDICTION FOR UNCHARACTERIZED PROTEIN (I1L8H3)	MOL_ID: 1; ORGANISM_SCIENTIFIC: GLYCINE MAX; ORGANISM_TAXID: 3847	01-JUL-21	12-OCT-21	n/a	10292.5	0.748	7.61	0.077	0.814	0.0011	2.82	0.0037	19	0.3	36	13.5	5.25	3.83	75	0	73.59	1.2766
Q19T08-F1	AF-Q19T08-F1-model_v1	ALPHAFOLD V2.0 PREDICTION FOR ENDOTHELIAL CELL-SPECIFIC CHEMOTAXIS REGULATOR (Q19T08)	MOL_ID: 1; ORGANISM_SCIENTIFIC: HOMO SAPIENS; ORGANISM_TAXID: 9606	01-JUL-21	12-OCT-21	1-24	18693	0.731	5.06	0.051	1.05	0.0013	4.23	0.0053	33.5	0.53	54	19	7.87	4.44	20	0	55.36	1.2766
P77510-F1	AF-P77510-F1-model_v1	ALPHAFOLD V2.0 PREDICTION FOR SENSOR HISTIDINE KINASE DPIB (P77510)	MOL_ID: 1; ORGANISM_SCIENTIFIC: ESCHERICHIA COLI (STRAIN K12); ORGANISM_TAXID: 83333	01-JUL-21	12-OCT-21	n/a	61688.2	0.744	4.74	0.048	3.09	0.0039	4.52	0.0057	12.1	0.19	57.7	18.89	6.79	6.64	46.5	16.3	85.58	1.27655
Q9VDD1-F1	AF-Q9VDD1-F1-model_v1	ALPHAFOLD V2.0 PREDICTION FOR DDRGK DOMAIN-CONTAINING PROTEIN 1 (Q9VDD1)	MOL_ID: 1; ORGANISM_SCIENTIFIC: DROSOPHILA MELANOGASTER; ORGANISM_TAXID: 7227	01-JUL-21	12-OCT-21	1-28	31308.4	0.728	4.93	0.05	1.73	0.0021	4.34	0.0053	20	0.31	55.4	19.1	7.47	6.19	50	2.5	73.68	1.2765
Q9XZS3-F1	AF-Q9XZS3-F1-model_v1	ALPHAFOLD V2.0 PREDICTION FOR TRANSLATION MACHINERY-ASSOCIATED PROTEIN 7 HOMOLOG (Q9XZS3)	MOL_ID: 1; ORGANISM_SCIENTIFIC: DROSOPHILA MELANOGASTER; ORGANISM_TAXID: 7227	01-JUL-21	12-OCT-21	n/a	6879.1	0.744	8.71	0.088	0.633	0.00085	2.46	0.0033	19.7	0.31	31.4	12.46	3.3	2.44	41.3	0	69.77	1.27642
Q4E597-F1	AF-Q4E597-F1-model_v1	ALPHAFOLD V2.0 PREDICTION FOR UNCHARACTERIZED PROTEIN (Q4E597)	MOL_ID: 1; ORGANISM_SCIENTIFIC: TRYPANOSOMA CRUZI (STRAIN CL BRENER); ORGANISM_TAXID: 353153	01-JUL-21	12-OCT-21	1-25	12742.4	0.73	7.8	0.078	1.11	0.0013	2.75	0.0033	12.6	0.2	35.1	10.88	5.61	3.61	41.9	0	63.5	1.27636
A0A1D6QKU2-F1	AF-A0A1D6QKU2-F1-model_v1	ALPHAFOLD V2.0 PREDICTION FOR PUTATIVE LECTIN-DOMAIN RECEPTOR-LIKE PROTEIN KINASE FAMILY PROTEIN (A0A1D6QKU2)	MOL_ID: 1; ORGANISM_SCIENTIFIC: ZEA MAYS; ORGANISM_TAXID: 4577	01-JUL-21	12-OCT-21	1-43	68109.7	0.731	4.89	0.049	3.69	0.0043	4.38	0.0051	9.49	0.15	55.9	17.2	7.97	6.79	26.4	20.3	84.96	1.27626
A0A0P0XNF4-F1	AF-A0A0P0XNF4-F1-model_v1	ALPHAFOLD V2.0 PREDICTION FOR OS09G0486375 PROTEIN (A0A0P0XNF4)	MOL_ID: 1; ORGANISM_SCIENTIFIC: ORYZA SATIVA SUBSP. JAPONICA; ORGANISM_TAXID: 39947	01-JUL-21	12-OCT-21	n/a	7065.8	0.723	9.69	0.098	0.782	0.00099	2.21	0.0028	13	0.2	28.2	10.34	3.01	2.78	75.8	0	69.24	1.27602
Q66H66-F1	AF-Q66H66-F1-model_v1	ALPHAFOLD V2.0 PREDICTION FOR RAB11 FAMILY-INTERACTING PROTEIN 3 (Q66H66)	MOL_ID: 1; ORGANISM_SCIENTIFIC: RATTUS NORVEGICUS; ORGANISM_TAXID: 10116	01-JUL-21	12-OCT-21	n/a	51062.4	0.725	3.76	0.038	2.18	0.0028	5.7	0.0074	29.6	0.47	72.7	28.09	10.35	8.35	63.1	0	76.19	1.27544
Q0JBZ7-F1	AF-Q0JBZ7-F1-model_v1	ALPHAFOLD V2.0 PREDICTION FOR OS04G0501000 PROTEIN (Q0JBZ7)	MOL_ID: 1; ORGANISM_SCIENTIFIC: ORYZA SATIVA SUBSP. JAPONICA; ORGANISM_TAXID: 39947	01-JUL-21	12-OCT-21	n/a	16939.2	0.758	6.54	0.066	1.11	0.0014	3.27	0.0041	17.4	0.27	41.7	13.61	7.27	4.75	27.8	13.9	89.42	1.27523
Q7Z4B0-F1	AF-Q7Z4B0-F1-model_v1	ALPHAFOLD V2.0 PREDICTION FOR PUTATIVE UNCHARACTERIZED PROTEIN ENCODED BY LINC00305 (Q7Z4B0)	MOL_ID: 1; ORGANISM_SCIENTIFIC: HOMO SAPIENS; ORGANISM_TAXID: 9606	01-JUL-21	12-OCT-21	1-29	9487	0.729	8.54	0.086	0.905	0.0011	2.51	0.0031	13.9	0.22	32	11.19	3.32	2.72	64.6	0	57.93	1.2749
Q6X9T8-F1	AF-Q6X9T8-F1-model_v1	ALPHAFOLD V2.0 PREDICTION FOR HEMATOPOIETIC CELL SIGNAL TRANSDUCER (Q6X9T8)	MOL_ID: 1; ORGANISM_SCIENTIFIC: RATTUS NORVEGICUS; ORGANISM_TAXID: 10116	01-JUL-21	12-OCT-21	1-18	6329.5	0.74	10.1	0.1	0.688	0.00087	2.11	0.0027	12.5	0.2	26.9	9.92	3.1	1.96	48.3	0	75.89	1.27488
I1NE22-F1	AF-I1NE22-F1-model_v1	ALPHAFOLD V2.0 PREDICTION FOR MLAD DOMAIN-CONTAINING PROTEIN (I1NE22)	MOL_ID: 1; ORGANISM_SCIENTIFIC: GLYCINE MAX; ORGANISM_TAXID: 3847	01-JUL-21	12-OCT-21	n/a	41898	0.751	4.18	0.042	1.8	0.0024	5.13	0.0068	27.9	0.44	65.4	25.16	7.31	6.99	49.7	10.5	76.28	1.27485
A0A0P0XTL8-F1	AF-A0A0P0XTL8-F1-model_v1	ALPHAFOLD V2.0 PREDICTION FOR OS10G0366567 PROTEIN (A0A0P0XTL8)	MOL_ID: 1; ORGANISM_SCIENTIFIC: ORYZA SATIVA SUBSP. JAPONICA; ORGANISM_TAXID: 39947	01-JUL-21	12-OCT-21	n/a	11834	0.724	6.33	0.064	0.852	0.0011	3.39	0.0044	27.1	0.43	43.2	14.66	8.11	3.89	0	0	59.18	1.27434
F6WY25-F1	AF-F6WY25-F1-model_v1	ALPHAFOLD V2.0 PREDICTION FOR PREDICTED GENE 10271 (F6WY25)	MOL_ID: 1; ORGANISM_SCIENTIFIC: MUS MUSCULUS; ORGANISM_TAXID: 10090	01-JUL-21	12-OCT-21	n/a	6283	0.819	11.5	0.12	0.542	0.00068	1.86	0.0023	8.55	0.13	23.7	8.36	2.58	1.94	96.1	0	92.25	1.27419
K7N4C4-F1	AF-K7N4C4-F1-model_v1	ALPHAFOLD V2.0 PREDICTION FOR UNCHARACTERIZED PROTEIN (K7N4C4)	MOL_ID: 1; ORGANISM_SCIENTIFIC: GLYCINE MAX; ORGANISM_TAXID: 3847	01-JUL-21	12-OCT-21	n/a	6378.4	0.754	10.9	0.11	0.702	0.00088	1.97	0.0025	10.1	0.16	25.1	9.16	2.79	2.05	81.8	0	77.9	1.27411
Q4CZB4-F1	AF-Q4CZB4-F1-model_v1	ALPHAFOLD V2.0 PREDICTION FOR UNCHARACTERIZED PROTEIN (Q4CZB4)	MOL_ID: 1; ORGANISM_SCIENTIFIC: TRYPANOSOMA CRUZI (STRAIN CL BRENER); ORGANISM_TAXID: 353153	01-JUL-21	12-OCT-21	n/a	50586.7	0.722	3.78	0.038	2.19	0.0028	5.66	0.0072	30.5	0.48	72.1	25.47	11.95	8.63	49.5	0	65.49	1.27385
A0A1D5RM53-F1	AF-A0A1D5RM53-F1-model_v1	ALPHAFOLD V2.0 PREDICTION FOR CDIP TRANSFERASE, OPPOSITE STRAND (A0A1D5RM53)	MOL_ID: 1; ORGANISM_SCIENTIFIC: MUS MUSCULUS; ORGANISM_TAXID: 10090	01-JUL-21	12-OCT-21	n/a	12743.8	0.724	6.18	0.062	0.895	0.0011	3.47	0.0042	26	0.41	44.2	12.49	8.32	5.4	23.3	0	67.18	1.27378
A1A5P4-F1	AF-A1A5P4-F1-model_v1	ALPHAFOLD V2.0 PREDICTION FOR KINESIN-LIKE PROTEIN (A1A5P4)	MOL_ID: 1; ORGANISM_SCIENTIFIC: RATTUS NORVEGICUS; ORGANISM_TAXID: 10116	01-JUL-21	12-OCT-21	n/a	85068.9	0.731	3.43	0.035	3.23	0.004	6.25	0.0078	23.4	0.37	79.6	28.43	9.87	7.51	57.3	9	79.35	1.2736
A0A2R8Q8P8-F1	AF-A0A2R8Q8P8-F1-model_v1	ALPHAFOLD V2.0 PREDICTION FOR UNCHARACTERIZED PROTEIN (A0A2R8Q8P8)	MOL_ID: 1; ORGANISM_SCIENTIFIC: DANIO RERIO; ORGANISM_TAXID: 7955	01-JUL-21	12-OCT-21	n/a	10775.1	0.734	6.74	0.068	0.797	0.001	3.18	0.004	24.5	0.39	40.5	13.47	8.44	3	42.4	0	62.33	1.27358
Q6YSY4-F1	AF-Q6YSY4-F1-model_v1	ALPHAFOLD V2.0 PREDICTION FOR OS07G0247300 PROTEIN (Q6YSY4)	MOL_ID: 1; ORGANISM_SCIENTIFIC: ORYZA SATIVA SUBSP. JAPONICA; ORGANISM_TAXID: 39947	01-JUL-21	12-OCT-21	n/a	7368.9	0.752	8.74	0.088	0.659	0.00083	2.45	0.0031	16.8	0.26	31.2	11.37	4	3.27	27.1	0	58.89	1.27347
Q54GQ8-F1	AF-Q54GQ8-F1-model_v1	ALPHAFOLD V2.0 PREDICTION FOR PUTATIVE UNCHARACTERIZED PROTEIN DDB_G0289989 (Q54GQ8)	MOL_ID: 1; ORGANISM_SCIENTIFIC: DICTYOSTELIUM DISCOIDEUM; ORGANISM_TAXID: 44689	01-JUL-21	12-OCT-21	n/a	6471.2	0.727	9.91	0.1	0.722	0.00093	2.16	0.0028	13.5	0.21	27.5	10.24	3.58	2.22	59.3	0	51.33	1.27315
Q6UWW9-F1	AF-Q6UWW9-F1-model_v1	ALPHAFOLD V2.0 PREDICTION FOR TRANSMEMBRANE PROTEIN 207 (Q6UWW9)	MOL_ID: 1; ORGANISM_SCIENTIFIC: HOMO SAPIENS; ORGANISM_TAXID: 9606	01-JUL-21	12-OCT-21	1-29	12973.4	0.743	6.57	0.066	0.903	0.0011	3.26	0.0039	22	0.34	41.5	13.61	5.85	5.18	27.6	0	64.57	1.27301
Q13326-F1	AF-Q13326-F1-model_v1	ALPHAFOLD V2.0 PREDICTION FOR GAMMA-SARCOGLYCAN (Q13326)	MOL_ID: 1; ORGANISM_SCIENTIFIC: HOMO SAPIENS; ORGANISM_TAXID: 9606	01-JUL-21	12-OCT-21	n/a	32375	0.743	4.99	0.05	1.71	0.0023	4.29	0.0058	22.8	0.36	54.6	21.19	6.59	5.03	11	20.3	80.49	1.27273
Q2TAC2-F1	AF-Q2TAC2-F1-model_v1	ALPHAFOLD V2.0 PREDICTION FOR COILED-COIL DOMAIN-CONTAINING PROTEIN 57 (Q2TAC2)	MOL_ID: 1; ORGANISM_SCIENTIFIC: HOMO SAPIENS; ORGANISM_TAXID: 9606	01-JUL-21	12-OCT-21	n/a	103048	0.73	2.6	0.026	2.98	0.0039	8.25	0.011	45.2	0.72	105	38.52	14.8	6.89	67.1	0	70.36	1.27273
Q9NWD9-F1	AF-Q9NWD9-F1-model_v1	ALPHAFOLD V2.0 PREDICTION FOR PROTEIN BEX4 (Q9NWD9)	MOL_ID: 1; ORGANISM_SCIENTIFIC: HOMO SAPIENS; ORGANISM_TAXID: 9606	01-JUL-21	12-OCT-21	n/a	14066.8	0.709	6.09	0.061	1.03	0.0013	3.52	0.0045	25.2	0.4	44.8	16.89	5.8	4.52	27.7	0	63.64	1.27273
O60927-F1	AF-O60927-F1-model_v1	ALPHAFOLD V2.0 PREDICTION FOR E3 UBIQUITIN-PROTEIN LIGASE PPP1R11 (O60927)	MOL_ID: 1; ORGANISM_SCIENTIFIC: HOMO SAPIENS; ORGANISM_TAXID: 9606	01-JUL-21	12-OCT-21	n/a	13952.7	0.712	6.09	0.061	1.01	0.0014	3.52	0.0047	28.3	0.45	44.8	18.12	5.19	4.73	0	0	66.42	1.27273
A0A0P0X3V0-F1	AF-A0A0P0X3V0-F1-model_v1	ALPHAFOLD V2.0 PREDICTION FOR OS07G0222900 PROTEIN (A0A0P0X3V0)	MOL_ID: 1; ORGANISM_SCIENTIFIC: ORYZA SATIVA SUBSP. JAPONICA; ORGANISM_TAXID: 39947	01-JUL-21	12-OCT-21	n/a	10373.2	0.736	8.35	0.084	0.942	0.0012	2.57	0.0034	14.8	0.24	32.7	12.68	3.54	3.16	30.9	7.2	87.19	1.27237
Q9Y2S6-F1	AF-Q9Y2S6-F1-model_v1	ALPHAFOLD V2.0 PREDICTION FOR TRANSLATION MACHINERY-ASSOCIATED PROTEIN 7 (Q9Y2S6)	MOL_ID: 1; ORGANISM_SCIENTIFIC: HOMO SAPIENS; ORGANISM_TAXID: 9606	01-JUL-21	12-OCT-21	n/a	7078.5	0.749	8.72	0.088	0.639	0.00086	2.46	0.0033	19.5	0.31	31.3	12.97	2.53	2.19	57.1	0	70.99	1.27236
A0A0P0XTA8-F1	AF-A0A0P0XTA8-F1-model_v1	ALPHAFOLD V2.0 PREDICTION FOR OS10G0198333 PROTEIN (A0A0P0XTA8)	MOL_ID: 1; ORGANISM_SCIENTIFIC: ORYZA SATIVA SUBSP. JAPONICA; ORGANISM_TAXID: 39947	01-JUL-21	12-OCT-21	n/a	8287.7	0.738	9.4	0.095	0.841	0.0011	2.28	0.003	12.6	0.2	29	11.04	2.74	2.56	64.9	0	70.81	1.27193
Q4DWG4-F1	AF-Q4DWG4-F1-model_v1	ALPHAFOLD V2.0 PREDICTION FOR SB DOMAIN-CONTAINING PROTEIN (Q4DWG4)	MOL_ID: 1; ORGANISM_SCIENTIFIC: TRYPANOSOMA CRUZI (STRAIN CL BRENER); ORGANISM_TAXID: 353153	01-JUL-21	12-OCT-21	n/a	48033.8	0.736	4.77	0.048	2.49	0.003	4.49	0.0055	15.3	0.24	57.1	19.55	6.57	6.25	51.3	6.3	79.76	1.27171
A0A1D6H5L2-F1	AF-A0A1D6H5L2-F1-model_v1	ALPHAFOLD V2.0 PREDICTION FOR UNCHARACTERIZED PROTEIN (A0A1D6H5L2)	MOL_ID: 1; ORGANISM_SCIENTIFIC: ZEA MAYS; ORGANISM_TAXID: 4577	01-JUL-21	12-OCT-21	n/a	11235.1	0.734	6.76	0.068	0.832	0.00098	3.17	0.0037	21.8	0.34	40.3	12.29	7.03	4.97	15.9	0	62.34	1.27129
Q3TBW2-F1	AF-Q3TBW2-F1-model_v1	ALPHAFOLD V2.0 PREDICTION FOR 39S RIBOSOMAL PROTEIN L10, MITOCHONDRIAL (Q3TBW2)	MOL_ID: 1; ORGANISM_SCIENTIFIC: MUS MUSCULUS; ORGANISM_TAXID: 10090	01-JUL-21	12-OCT-21	n/a	29414.4	0.752	4.93	0.05	1.48	0.002	4.35	0.006	27	0.43	55.3	23.69	6.95	4.28	44.8	7.7	84.49	1.27126
Q9UIF3-F1	AF-Q9UIF3-F1-model_v1	ALPHAFOLD V2.0 PREDICTION FOR TEKTIN-2 (Q9UIF3)	MOL_ID: 1; ORGANISM_SCIENTIFIC: HOMO SAPIENS; ORGANISM_TAXID: 9606	01-JUL-21	12-OCT-21	n/a	49668.7	0.732	4.27	0.043	2.34	0.0032	5.02	0.0069	23.2	0.37	63.8	27.16	8.91	4.39	80	0	90.9	1.27092
Q9Y0V3-F1	AF-Q9Y0V3-F1-model_v1	ALPHAFOLD V2.0 PREDICTION FOR MITOCHONDRIAL IMPORT INNER MEMBRANE TRANSLOCASE SUBUNIT TIM10B (Q9Y0V3)	MOL_ID: 1; ORGANISM_SCIENTIFIC: DROSOPHILA MELANOGASTER; ORGANISM_TAXID: 7227	01-JUL-21	12-OCT-21	n/a	13517.6	0.724	7.42	0.075	1.14	0.0014	2.89	0.0037	15.6	0.25	36.7	13.4	4.88	3.25	77.6	0	86.86	1.2699
O50456-F1	AF-O50456-F1-model_v1	ALPHAFOLD V2.0 PREDICTION FOR ANTITOXIN VAPB33 (O50456)	MOL_ID: 1; ORGANISM_SCIENTIFIC: MYCOBACTERIUM TUBERCULOSIS (STRAIN ATCC 25618 / H37RV); ORGANISM_TAXID: 83332	01-JUL-21	12-OCT-21	n/a	9919.2	0.731	8.51	0.086	0.937	0.0011	2.52	0.003	12.7	0.2	32	10.65	4.05	3.93	54.1	0	91.41	1.26984
Q2FUV8-F1	AF-Q2FUV8-F1-model_v1	ALPHAFOLD V2.0 PREDICTION FOR UNCHARACTERIZED PROTEIN (Q2FUV8)	MOL_ID: 1; ORGANISM_SCIENTIFIC: STAPHYLOCOCCUS AUREUS (STRAIN NCTC 8325 / PS 47); ORGANISM_TAXID: 93061	01-JUL-21	12-OCT-21	n/a	11002.4	0.732	8.03	0.081	0.976	0.0012	2.67	0.0033	13.9	0.22	33.9	11.92	4.8	2.83	71.7	0	83.67	1.26966
A0A0P0X3Z2-F1	AF-A0A0P0X3Z2-F1-model_v1	ALPHAFOLD V2.0 PREDICTION FOR OS07G0206850 PROTEIN (A0A0P0X3Z2)	MOL_ID: 1; ORGANISM_SCIENTIFIC: ORYZA SATIVA SUBSP. JAPONICA; ORGANISM_TAXID: 39947	01-JUL-21	12-OCT-21	n/a	18338.5	0.705	5.07	0.051	1.13	0.0014	4.23	0.0052	33	0.52	53.7	18.18	7.88	6.87	17.7	0	51.54	1.2695
E9AGW7-F1	AF-E9AGW7-F1-model_v1	ALPHAFOLD V2.0 PREDICTION FOR HYPOTHETICAL_PROTEIN_-_CONSERVED (E9AGW7)	MOL_ID: 1; ORGANISM_SCIENTIFIC: LEISHMANIA INFANTUM; ORGANISM_TAXID: 5671	01-JUL-21	12-OCT-21	n/a	16728.8	0.73	6.97	0.07	1.3	0.0017	3.08	0.0039	14.7	0.23	39.1	14.66	4.72	3.84	83	0	73.52	1.26948
O17115-F1	AF-O17115-F1-model_v1	ALPHAFOLD V2.0 PREDICTION FOR UNCHARACTERIZED PROTEIN (O17115)	MOL_ID: 1; ORGANISM_SCIENTIFIC: CAENORHABDITIS ELEGANS; ORGANISM_TAXID: 6239	01-JUL-21	12-OCT-21	n/a	8039.1	0.736	8.75	0.088	0.766	0.00097	2.45	0.0031	15.6	0.25	31.1	11.26	4.07	2.73	65.2	0	64.57	1.26939
M0RDT4-F1	AF-M0RDT4-F1-model_v1	ALPHAFOLD V2.0 PREDICTION FOR 60S RIBOSOMAL PROTEIN L19 (M0RDT4)	MOL_ID: 1; ORGANISM_SCIENTIFIC: RATTUS NORVEGICUS; ORGANISM_TAXID: 10116	01-JUL-21	12-OCT-21	n/a	22256.7	0.743	6.34	0.064	1.5	0.0019	3.38	0.0042	14.6	0.23	42.9	15.17	6.1	4	65.8	2.1	93.05	1.26923
Q9Y5F7-F1	AF-Q9Y5F7-F1-model_v1	ALPHAFOLD V2.0 PREDICTION FOR PROTOCADHERIN GAMMA-C4 (Q9Y5F7)	MOL_ID: 1; ORGANISM_SCIENTIFIC: HOMO SAPIENS; ORGANISM_TAXID: 9606	01-JUL-21	12-OCT-21	1-29	97572	0.729	3.35	0.034	3.65	0.0045	6.39	0.0079	21.2	0.33	81.1	28.96	11.64	9.67	8	25.4	75.61	1.26917
I1K157-F1	AF-I1K157-F1-model_v1	ALPHAFOLD V2.0 PREDICTION FOR UNCHARACTERIZED PROTEIN (I1K157)	MOL_ID: 1; ORGANISM_SCIENTIFIC: GLYCINE MAX; ORGANISM_TAXID: 3847	01-JUL-21	12-OCT-21	n/a	37080.4	0.732	4.21	0.042	1.73	0.0022	5.09	0.0064	28.3	0.45	64.6	21.91	10.59	5.59	62	0	75.54	1.26916
A4FVI5-F1	AF-A4FVI5-F1-model_v1	ALPHAFOLD V2.0 PREDICTION FOR GLA-RICH PROTEIN (A4FVI5)	MOL_ID: 1; ORGANISM_SCIENTIFIC: DANIO RERIO; ORGANISM_TAXID: 7955	01-JUL-21	12-OCT-21	1-26	13528.5	0.702	7.02	0.071	1.17	0.0015	3.05	0.0039	17.5	0.28	38.7	13.61	6.8	3.01	59.3	0	80.72	1.26885
Q9Y5G8-F1	AF-Q9Y5G8-F1-model_v1	ALPHAFOLD V2.0 PREDICTION FOR PROTOCADHERIN GAMMA-A5 (Q9Y5G8)	MOL_ID: 1; ORGANISM_SCIENTIFIC: HOMO SAPIENS; ORGANISM_TAXID: 9606	01-JUL-21	12-OCT-21	1-29	97932.3	0.732	3.29	0.033	3.56	0.0044	6.51	0.008	22.5	0.35	82.6	29.08	10.18	10.25	9.3	25.6	76.28	1.26882
F1QT60-F1	AF-F1QT60-F1-model_v1	ALPHAFOLD V2.0 PREDICTION FOR VIMENTIN-LIKE (F1QT60)	MOL_ID: 1; ORGANISM_SCIENTIFIC: DANIO RERIO; ORGANISM_TAXID: 7955	01-JUL-21	12-OCT-21	n/a	51591.1	0.725	3.82	0.038	2.23	0.0029	5.62	0.0074	28.5	0.45	71.3	26.7	8.69	5.96	71.1	3.8	79.31	1.26868
A0A0R0J068-F1	AF-A0A0R0J068-F1-model_v1	ALPHAFOLD V2.0 PREDICTION FOR UNCHARACTERIZED PROTEIN (A0A0R0J068)	MOL_ID: 1; ORGANISM_SCIENTIFIC: GLYCINE MAX; ORGANISM_TAXID: 3847	01-JUL-21	12-OCT-21	n/a	9273.4	0.763	8	0.081	0.725	0.00096	2.68	0.0035	18.1	0.29	34	13.44	4.85	3.16	43.8	0	67.62	1.26866
Q6DD96-F1	AF-Q6DD96-F1-model_v1	ALPHAFOLD V2.0 PREDICTION FOR PROTOCADHERIN GAMMA SUBFAMILY A, 7 (Q6DD96)	MOL_ID: 1; ORGANISM_SCIENTIFIC: MUS MUSCULUS; ORGANISM_TAXID: 10090	01-JUL-21	12-OCT-21	1-30	98105.7	0.733	3.2	0.032	3.45	0.0043	6.7	0.0083	24.1	0.38	85	29.59	13.58	10.74	9.2	24.4	75.05	1.26866
Q86YM7-F1	AF-Q86YM7-F1-model_v1	ALPHAFOLD V2.0 PREDICTION FOR HOMER PROTEIN HOMOLOG 1 (Q86YM7)	MOL_ID: 1; ORGANISM_SCIENTIFIC: HOMO SAPIENS; ORGANISM_TAXID: 9606	01-JUL-21	12-OCT-21	n/a	40271.9	0.728	4.26	0.043	1.92	0.0026	5.04	0.0069	28.7	0.46	63.9	27.75	6.47	8.06	58.6	13.6	86.17	1.26786
A0A0R0GGG3-F1	AF-A0A0R0GGG3-F1-model_v1	ALPHAFOLD V2.0 PREDICTION FOR UNCHARACTERIZED PROTEIN (A0A0R0GGG3)	MOL_ID: 1; ORGANISM_SCIENTIFIC: GLYCINE MAX; ORGANISM_TAXID: 3847	01-JUL-21	12-OCT-21	n/a	8487.4	0.737	8.95	0.09	0.824	0.001	2.39	0.003	13.8	0.22	30.3	10.57	3.9	2.59	78.1	0	51.26	1.26778
Q9H2G9-F1	AF-Q9H2G9-F1-model_v1	ALPHAFOLD V2.0 PREDICTION FOR GOLGIN-45 (Q9H2G9)	MOL_ID: 1; ORGANISM_SCIENTIFIC: HOMO SAPIENS; ORGANISM_TAXID: 9606	01-JUL-21	12-OCT-21	n/a	44925.1	0.736	4.19	0.042	2.05	0.0026	5.12	0.0064	24.1	0.38	64.9	24.04	11.06	6.16	49.9	0	71.73	1.26758
E0R7K2-F1	AF-E0R7K2-F1-model_v1	ALPHAFOLD V2.0 PREDICTION FOR UNCHARACTERIZED PROTEIN (E0R7K2)	MOL_ID: 1; ORGANISM_SCIENTIFIC: CAENORHABDITIS ELEGANS; ORGANISM_TAXID: 6239	01-JUL-21	12-OCT-21	n/a	8401.7	0.713	9.4	0.095	0.934	0.0012	2.28	0.0029	12.1	0.19	28.9	10.65	2.44	2.18	92.3	0	95.95	1.26754
Q4D6Q3-F1	AF-Q4D6Q3-F1-model_v1	ALPHAFOLD V2.0 PREDICTION FOR UNCHARACTERIZED PROTEIN (Q4D6Q3)	MOL_ID: 1; ORGANISM_SCIENTIFIC: TRYPANOSOMA CRUZI (STRAIN CL BRENER); ORGANISM_TAXID: 353153	01-JUL-21	12-OCT-21	n/a	91883.2	0.723	2.72	0.027	2.85	0.0038	7.89	0.011	45.5	0.72	100	39.38	14.35	7.86	73.7	0	73.99	1.26743
A0A0P0Y890-F1	AF-A0A0P0Y890-F1-model_v1	ALPHAFOLD V2.0 PREDICTION FOR OS12G0220800 PROTEIN (A0A0P0Y890)	MOL_ID: 1; ORGANISM_SCIENTIFIC: ORYZA SATIVA SUBSP. JAPONICA; ORGANISM_TAXID: 39947	01-JUL-21	12-OCT-21	n/a	9778.3	0.735	7.45	0.075	0.796	0.00098	2.88	0.0035	20.3	0.32	36.5	12.3	5.39	4.15	27.4	0	57.85	1.26736
A0A0P0Y2J2-F1	AF-A0A0P0Y2J2-F1-model_v1	ALPHAFOLD V2.0 PREDICTION FOR OS11G0477400 PROTEIN (A0A0P0Y2J2)	MOL_ID: 1; ORGANISM_SCIENTIFIC: ORYZA SATIVA SUBSP. JAPONICA; ORGANISM_TAXID: 39947	01-JUL-21	12-OCT-21	n/a	6800	0.711	9.26	0.093	0.75	0.00094	2.32	0.0029	14.8	0.23	29.4	9.94	4.68	2.39	50.9	0	70.36	1.26724
A0A0N7KM85-F1	AF-A0A0N7KM85-F1-model_v1	ALPHAFOLD V2.0 PREDICTION FOR OS06G0538650 PROTEIN (A0A0N7KM85)	MOL_ID: 1; ORGANISM_SCIENTIFIC: ORYZA SATIVA SUBSP. JAPONICA; ORGANISM_TAXID: 39947	01-JUL-21	12-OCT-21	n/a	8549.6	0.73	8.67	0.087	0.825	0.0011	2.47	0.0032	15.8	0.25	31.3	12.35	3.77	2.81	68.5	0	57.87	1.26721
Q2VPA4-F1	AF-Q2VPA4-F1-model_v1	ALPHAFOLD V2.0 PREDICTION FOR COMPLEMENT COMPONENT RECEPTOR 1-LIKE PROTEIN (Q2VPA4)	MOL_ID: 1; ORGANISM_SCIENTIFIC: HOMO SAPIENS; ORGANISM_TAXID: 9606	01-JUL-21	12-OCT-21	1-32	59157.7	0.726	4.21	0.042	2.81	0.0036	5.09	0.0066	18.1	0.29	64.5	21.84	10.77	4.1	0.8	28	85.28	1.26719
W5XKT8-F1	AF-W5XKT8-F1-model_v1	ALPHAFOLD V2.0 PREDICTION FOR SPERM ACROSOME MEMBRANE-ASSOCIATED PROTEIN 6 (W5XKT8)	MOL_ID: 1; ORGANISM_SCIENTIFIC: HOMO SAPIENS; ORGANISM_TAXID: 9606	01-JUL-21	12-OCT-21	1-26	33718.5	0.733	5.61	0.057	2.08	0.0027	3.82	0.0049	14.3	0.23	48.4	18.55	6.38	3.87	41.8	15.2	89.84	1.26702
K7KGY1-F1	AF-K7KGY1-F1-model_v1	ALPHAFOLD V2.0 PREDICTION FOR UNCHARACTERIZED PROTEIN (K7KGY1)	MOL_ID: 1; ORGANISM_SCIENTIFIC: GLYCINE MAX; ORGANISM_TAXID: 3847	01-JUL-21	12-OCT-21	n/a	8198.8	0.752	9.08	0.091	0.761	0.00095	2.36	0.003	13.5	0.21	29.9	10.6	4.55	2.25	76.1	0	58.32	1.26695
P0ABX8-F1	AF-P0ABX8-F1-model_v1	ALPHAFOLD V2.0 PREDICTION FOR FLAGELLAR PROTEIN FLIL (P0ABX8)	MOL_ID: 1; ORGANISM_SCIENTIFIC: ESCHERICHIA COLI (STRAIN K12); ORGANISM_TAXID: 83333	01-JUL-21	12-OCT-21	n/a	17226.9	0.748	7.23	0.073	1.3	0.0017	2.96	0.0039	13.9	0.22	37.5	15.39	4.55	3.12	48.4	15.7	85.58	1.26689
A0A0R0IQI6-F1	AF-A0A0R0IQI6-F1-model_v1	ALPHAFOLD V2.0 PREDICTION FOR UNCHARACTERIZED PROTEIN (A0A0R0IQI6)	MOL_ID: 1; ORGANISM_SCIENTIFIC: GLYCINE MAX; ORGANISM_TAXID: 3847	01-JUL-21	12-OCT-21	n/a	8664.6	0.723	7.92	0.08	0.784	0.00098	2.7	0.0034	18.7	0.29	34.2	12.62	4.39	2.46	2.7	0	55.28	1.26667
K7K111-F1	AF-K7K111-F1-model_v1	ALPHAFOLD V2.0 PREDICTION FOR RETICULON-LIKE PROTEIN (K7K111)	MOL_ID: 1; ORGANISM_SCIENTIFIC: GLYCINE MAX; ORGANISM_TAXID: 3847	01-JUL-21	12-OCT-21	1-15	11212.4	0.769	8.14	0.082	0.87	0.0011	2.63	0.0033	13.5	0.21	33.3	11.82	4.9	2.36	80.6	0	75.24	1.26616
Q11078-F1	AF-Q11078-F1-model_v1	ALPHAFOLD V2.0 PREDICTION FOR UNCHARACTERIZED PROTEIN B0563.1 (Q11078)	MOL_ID: 1; ORGANISM_SCIENTIFIC: CAENORHABDITIS ELEGANS; ORGANISM_TAXID: 6239	01-JUL-21	12-OCT-21	n/a	21655.5	0.74	5.54	0.056	1.29	0.0017	3.87	0.0051	24.6	0.39	49	17.86	7.49	4.51	65	2.1	81.58	1.26615
A0A1D6K7V7-F1	AF-A0A1D6K7V7-F1-model_v1	ALPHAFOLD V2.0 PREDICTION FOR UNCHARACTERIZED PROTEIN (A0A1D6K7V7)	MOL_ID: 1; ORGANISM_SCIENTIFIC: ZEA MAYS; ORGANISM_TAXID: 4577	01-JUL-21	12-OCT-21	n/a	24722.1	0.737	5.77	0.058	1.55	0.002	3.72	0.0049	18.4	0.29	47.1	18.96	4.5	3.49	82.2	0	78.51	1.26613
A0A0N7KDF5-F1	AF-A0A0N7KDF5-F1-model_v1	ALPHAFOLD V2.0 PREDICTION FOR OS01G0653601 PROTEIN (A0A0N7KDF5)	MOL_ID: 1; ORGANISM_SCIENTIFIC: ORYZA SATIVA SUBSP. JAPONICA; ORGANISM_TAXID: 39947	01-JUL-21	12-OCT-21	n/a	7439.7	0.736	9.2	0.093	0.745	0.00092	2.33	0.0029	14.1	0.22	29.5	10.33	4.06	2.06	47.9	0	67.98	1.26609
A0A0R0JM46-F1	AF-A0A0R0JM46-F1-model_v1	ALPHAFOLD V2.0 PREDICTION FOR UNCHARACTERIZED PROTEIN (A0A0R0JM46)	MOL_ID: 1; ORGANISM_SCIENTIFIC: GLYCINE MAX; ORGANISM_TAXID: 3847	01-JUL-21	12-OCT-21	n/a	44274.4	0.736	5.64	0.057	2.72	0.0032	3.8	0.0045	9.77	0.15	48.1	15.03	5.54	4.94	42.4	9.2	66.6	1.26579
Q6ZIG6-F1	AF-Q6ZIG6-F1-model_v1	ALPHAFOLD V2.0 PREDICTION FOR OS02G0186400 PROTEIN (Q6ZIG6)	MOL_ID: 1; ORGANISM_SCIENTIFIC: ORYZA SATIVA SUBSP. JAPONICA; ORGANISM_TAXID: 39947	01-JUL-21	12-OCT-21	n/a	86142.9	0.737	2.8	0.028	2.62	0.0034	7.64	0.0098	42.3	0.67	96.7	37.58	14.89	7.06	84.4	0	76.64	1.26571
Q8N1A0-F1	AF-Q8N1A0-F1-model_v1	ALPHAFOLD V2.0 PREDICTION FOR KERATIN-LIKE PROTEIN KRT222 (Q8N1A0)	MOL_ID: 1; ORGANISM_SCIENTIFIC: HOMO SAPIENS; ORGANISM_TAXID: 9606	01-JUL-21	12-OCT-21	n/a	34156.2	0.737	4.49	0.045	1.66	0.0022	4.78	0.0064	28	0.44	60.5	25.09	8.04	6.77	58.5	5.4	74.65	1.26569
A0A2R8RK86-F1	AF-A0A2R8RK86-F1-model_v1	ALPHAFOLD V2.0 PREDICTION FOR G_PROTEIN_RECEP_F3_4 DOMAIN-CONTAINING PROTEIN (A0A2R8RK86)	MOL_ID: 1; ORGANISM_SCIENTIFIC: DANIO RERIO; ORGANISM_TAXID: 7955	01-JUL-21	12-OCT-21	n/a	65181.1	0.748	4.79	0.048	3.24	0.0041	4.48	0.0056	11.2	0.18	56.7	18.06	8.23	4.88	47.8	8.8	87.71	1.26562
P05787-F1	AF-P05787-F1-model_v1	ALPHAFOLD V2.0 PREDICTION FOR KERATIN, TYPE II CYTOSKELETAL 8 (P05787)	MOL_ID: 1; ORGANISM_SCIENTIFIC: HOMO SAPIENS; ORGANISM_TAXID: 9606	01-JUL-21	12-OCT-21	n/a	53706.8	0.729	3.77	0.038	2.26	0.003	5.69	0.0075	29.1	0.46	72	27.98	7.67	6.61	63.9	4.8	74.38	1.26538
A8MVW5-F1	AF-A8MVW5-F1-model_v1	ALPHAFOLD V2.0 PREDICTION FOR HEPACAM FAMILY MEMBER 2 (A8MVW5)	MOL_ID: 1; ORGANISM_SCIENTIFIC: HOMO SAPIENS; ORGANISM_TAXID: 9606	01-JUL-21	12-OCT-21	1-31	48066	0.738	4.48	0.045	2.32	0.0029	4.79	0.0059	18.6	0.29	60.6	20.8	10.41	6.91	11.2	30.2	81.04	1.26514
Q5STR5-F1	AF-Q5STR5-F1-model_v1	ALPHAFOLD V2.0 PREDICTION FOR SMALL INTEGRAL MEMBRANE PROTEIN 40 (Q5STR5)	MOL_ID: 1; ORGANISM_SCIENTIFIC: HOMO SAPIENS; ORGANISM_TAXID: 9606	01-JUL-21	12-OCT-21	n/a	8944.7	0.762	8.6	0.087	0.755	0.00096	2.49	0.0032	14.6	0.23	31.5	11.11	5.36	2.53	64.1	0	77.03	1.26506
Q6Z356-F1	AF-Q6Z356-F1-model_v1	ALPHAFOLD V2.0 PREDICTION FOR OS07G0281200 PROTEIN (Q6Z356)	MOL_ID: 1; ORGANISM_SCIENTIFIC: ORYZA SATIVA SUBSP. JAPONICA; ORGANISM_TAXID: 39947	01-JUL-21	12-OCT-21	1-17	9534.7	0.729	7.76	0.078	0.826	0.00099	2.76	0.0033	16.9	0.26	34.9	12.13	5.52	2.46	22.4	0	62.71	1.26449
F1M337-F1	AF-F1M337-F1-model_v1	ALPHAFOLD V2.0 PREDICTION FOR SIMILAR TO RIKEN CDNA 5031410I06 (F1M337)	MOL_ID: 1; ORGANISM_SCIENTIFIC: RATTUS NORVEGICUS; ORGANISM_TAXID: 10116	01-JUL-21	12-OCT-21	n/a	30145.9	0.73	5.15	0.052	1.73	0.0022	4.16	0.0053	19.2	0.3	52.6	19.56	5.56	5.43	65.5	0	69.57	1.26442
A0A0P0XDT3-F1	AF-A0A0P0XDT3-F1-model_v1	ALPHAFOLD V2.0 PREDICTION FOR OS08G0280400 PROTEIN (A0A0P0XDT3)	MOL_ID: 1; ORGANISM_SCIENTIFIC: ORYZA SATIVA SUBSP. JAPONICA; ORGANISM_TAXID: 39947	01-JUL-21	12-OCT-21	n/a	7712.6	0.713	7.27	0.073	0.663	0.00084	2.95	0.0037	27	0.42	37.3	13.05	6.92	5.29	2.6	0	65.94	1.26441
O60675-F1	AF-O60675-F1-model_v1	ALPHAFOLD V2.0 PREDICTION FOR TRANSCRIPTION FACTOR MAFK (O60675)	MOL_ID: 1; ORGANISM_SCIENTIFIC: HOMO SAPIENS; ORGANISM_TAXID: 9606	01-JUL-21	12-OCT-21	n/a	17537.2	0.737	6.36	0.064	1.21	0.0015	3.37	0.0042	17.9	0.28	42.6	14.8	7.14	4	56.1	0	83.1	1.26409
Q19685-F1	AF-Q19685-F1-model_v1	ALPHAFOLD V2.0 PREDICTION FOR MITOCHONDRIAL RIBOSOMAL PROTEIN, SMALL (Q19685)	MOL_ID: 1; ORGANISM_SCIENTIFIC: CAENORHABDITIS ELEGANS; ORGANISM_TAXID: 6239	01-JUL-21	12-OCT-21	n/a	14523.4	0.744	7.06	0.071	1.08	0.0014	3.03	0.0039	16.2	0.26	38.3	14.14	5.33	3.96	41.6	0	85.6	1.26403
A0A0N7KSQ7-F1	AF-A0A0N7KSQ7-F1-model_v1	ALPHAFOLD V2.0 PREDICTION FOR OS11G0259501 PROTEIN (A0A0N7KSQ7)	MOL_ID: 1; ORGANISM_SCIENTIFIC: ORYZA SATIVA SUBSP. JAPONICA; ORGANISM_TAXID: 39947	01-JUL-21	12-OCT-21	n/a	7623.8	0.735	9.13	0.092	0.761	0.001	2.35	0.0031	14.7	0.23	29.7	11.3	4.01	2.5	41.4	0	68.98	1.26383
A0A1D6LHR9-F1	AF-A0A1D6LHR9-F1-model_v1	ALPHAFOLD V2.0 PREDICTION FOR UNCHARACTERIZED PROTEIN (A0A1D6LHR9)	MOL_ID: 1; ORGANISM_SCIENTIFIC: ZEA MAYS; ORGANISM_TAXID: 4577	01-JUL-21	12-OCT-21	n/a	6023.4	0.729	10.6	0.11	0.716	0.00088	2.01	0.0025	11.1	0.17	25.4	9.12	3.25	2.05	54.7	0	65.15	1.26368
Q4DKX5-F1	AF-Q4DKX5-F1-model_v1	ALPHAFOLD V2.0 PREDICTION FOR UNCHARACTERIZED PROTEIN (Q4DKX5)	MOL_ID: 1; ORGANISM_SCIENTIFIC: TRYPANOSOMA CRUZI (STRAIN CL BRENER); ORGANISM_TAXID: 353153	01-JUL-21	12-OCT-21	n/a	17651.7	0.725	6.14	0.062	1.23	0.0016	3.49	0.0046	20.6	0.33	44.1	16.51	8.4	3.64	65.5	0	78.87	1.26361
D3ZLN6-F1	AF-D3ZLN6-F1-model_v1	ALPHAFOLD V2.0 PREDICTION FOR TRIPARTITE MOTIF-CONTAINING 43A (D3ZLN6)	MOL_ID: 1; ORGANISM_SCIENTIFIC: RATTUS NORVEGICUS; ORGANISM_TAXID: 10116	01-JUL-21	12-OCT-21	n/a	52428.4	0.736	4.95	0.05	2.82	0.0035	4.33	0.0053	12.9	0.2	54.7	19.31	6.4	4.37	41.8	16	82.13	1.26328
Q9Y5F8-F1	AF-Q9Y5F8-F1-model_v1	ALPHAFOLD V2.0 PREDICTION FOR PROTOCADHERIN GAMMA-B7 (Q9Y5F8)	MOL_ID: 1; ORGANISM_SCIENTIFIC: HOMO SAPIENS; ORGANISM_TAXID: 9606	01-JUL-21	12-OCT-21	1-30	97607.1	0.73	3.28	0.033	3.56	0.0043	6.54	0.008	22.4	0.35	82.6	28.9	12.44	9.59	8.2	25.2	75.96	1.263
A0A1D6P8V9-F1	AF-A0A1D6P8V9-F1-model_v1	ALPHAFOLD V2.0 PREDICTION FOR MADS-BOX TRANSCRIPTION FACTOR 56 (A0A1D6P8V9)	MOL_ID: 1; ORGANISM_SCIENTIFIC: ZEA MAYS; ORGANISM_TAXID: 4577	01-JUL-21	12-OCT-21	n/a	13748.1	0.731	6.95	0.07	1.06	0.0013	3.08	0.0038	16.9	0.27	38.9	12.37	6.41	3.41	50	0	80.66	1.26299
P48771-F1	AF-P48771-F1-model_v1	ALPHAFOLD V2.0 PREDICTION FOR CYTOCHROME C OXIDASE SUBUNIT 7A2, MITOCHONDRIAL (P48771)	MOL_ID: 1; ORGANISM_SCIENTIFIC: MUS MUSCULUS; ORGANISM_TAXID: 10090	01-JUL-21	12-OCT-21	n/a	9299.8	0.745	8.52	0.086	0.834	0.0011	2.51	0.0033	14.4	0.23	31.7	11.24	5.62	2.42	59.8	0	89.9	1.26295
A6NI03-F1	AF-A6NI03-F1-model_v1	ALPHAFOLD V2.0 PREDICTION FOR PUTATIVE TRIPARTITE MOTIF-CONTAINING PROTEIN 64B (A6NI03)	MOL_ID: 1; ORGANISM_SCIENTIFIC: HOMO SAPIENS; ORGANISM_TAXID: 9606	01-JUL-21	12-OCT-21	n/a	51548.1	0.727	5.03	0.051	2.92	0.0036	4.26	0.0053	12.3	0.19	53.8	18.62	6.54	5.12	40.2	15.2	84.86	1.26291
Q9UK00-F1	AF-Q9UK00-F1-model_v1	ALPHAFOLD V2.0 PREDICTION FOR UNCHARACTERIZED PROTEIN C3ORF18 (Q9UK00)	MOL_ID: 1; ORGANISM_SCIENTIFIC: HOMO SAPIENS; ORGANISM_TAXID: 9606	01-JUL-21	12-OCT-21	n/a	17467	0.731	5.8	0.058	1.12	0.0014	3.69	0.0046	23.3	0.36	46.6	16.3	6.93	5.81	43.5	0	63.5	1.26287
Q9HBH7-F1	AF-Q9HBH7-F1-model_v1	ALPHAFOLD V2.0 PREDICTION FOR PROTEIN BEX1 (Q9HBH7)	MOL_ID: 1; ORGANISM_SCIENTIFIC: HOMO SAPIENS; ORGANISM_TAXID: 9606	01-JUL-21	12-OCT-21	n/a	14861.5	0.719	6.33	0.064	1.09	0.0014	3.39	0.0044	22.5	0.36	42.8	16.72	6.09	4.01	56.5	0	66.95	1.26254
B2RYT6-F1	AF-B2RYT6-F1-model_v1	ALPHAFOLD V2.0 PREDICTION FOR TRANSCRIPTION ELONGATION FACTOR A-LIKE 9 (B2RYT6)	MOL_ID: 1; ORGANISM_SCIENTIFIC: RATTUS NORVEGICUS; ORGANISM_TAXID: 10116	01-JUL-21	12-OCT-21	n/a	12689.6	0.72	7.11	0.072	1.04	0.0013	3.01	0.0037	17.6	0.28	38	13.32	4.36	3.84	55.3	0	67.31	1.26246
A0A1B0GTU2-F1	AF-A0A1B0GTU2-F1-model_v1	ALPHAFOLD V2.0 PREDICTION FOR CORTEXIN DOMAIN-CONTAINING 1 (A0A1B0GTU2)	MOL_ID: 1; ORGANISM_SCIENTIFIC: HOMO SAPIENS; ORGANISM_TAXID: 9606	01-JUL-21	12-OCT-21	n/a	6727.9	0.75	9.68	0.098	0.672	0.00088	2.21	0.0029	14.4	0.23	27.9	10.97	3.33	2.27	56.9	0	80.51	1.26244
D3ZP49-F1	AF-D3ZP49-F1-model_v1	ALPHAFOLD V2.0 PREDICTION FOR COILED-COIL DOMAIN-CONTAINING PROTEIN 72 (D3ZP49)	MOL_ID: 1; ORGANISM_SCIENTIFIC: RATTUS NORVEGICUS; ORGANISM_TAXID: 10116	01-JUL-21	12-OCT-21	n/a	7135.5	0.747	8.77	0.089	0.653	0.00089	2.44	0.0033	18.9	0.3	30.8	12.86	2.85	2.24	55.6	0	71.68	1.2623
Q9Y5G9-F1	AF-Q9Y5G9-F1-model_v1	ALPHAFOLD V2.0 PREDICTION FOR PROTOCADHERIN GAMMA-A4 (Q9Y5G9)	MOL_ID: 1; ORGANISM_SCIENTIFIC: HOMO SAPIENS; ORGANISM_TAXID: 9606	01-JUL-21	12-OCT-21	1-59	97507.5	0.73	3.29	0.033	3.57	0.0044	6.52	0.008	22.5	0.35	82.3	29.07	12.99	9.05	9.1	25.2	76.2	1.26227
A0A1W2PPG7-F1	AF-A0A1W2PPG7-F1-model_v1	ALPHAFOLD V2.0 PREDICTION FOR PUTATIVE GUANINE NUCLEOTIDE-BINDING PROTEIN G(I)/G(S)/G(O) SUBUNIT GAMMA-14 (A0A1W2PPG7)	MOL_ID: 1; ORGANISM_SCIENTIFIC: HOMO SAPIENS; ORGANISM_TAXID: 9606	01-JUL-21	12-OCT-21	n/a	7527.8	0.748	9.36	0.094	0.732	0.00088	2.29	0.0028	13.1	0.21	28.9	10.38	4.67	2.1	58.8	0	86.09	1.26201
A6NGK3-F1	AF-A6NGK3-F1-model_v1	ALPHAFOLD V2.0 PREDICTION FOR G ANTIGEN 10 (A6NGK3)	MOL_ID: 1; ORGANISM_SCIENTIFIC: HOMO SAPIENS; ORGANISM_TAXID: 9606	01-JUL-21	12-OCT-21	n/a	12637.4	0.703	6.04	0.061	0.934	0.0012	3.55	0.0044	28.6	0.45	44.8	16.2	6.59	4.6	3.5	0	64.94	1.26197
Q01645-F1	AF-Q01645-F1-model_v1	ALPHAFOLD V2.0 PREDICTION FOR MALE-SPECIFIC SPERM PROTEIN MST84DD (Q01645)	MOL_ID: 1; ORGANISM_SCIENTIFIC: DROSOPHILA MELANOGASTER; ORGANISM_TAXID: 7227	01-JUL-21	12-OCT-21	n/a	6843.4	0.694	9.19	0.093	0.793	0.00096	2.33	0.0028	15.1	0.24	29.4	9.91	4.6	3.31	0	0	45.28	1.2618
A0A1D6K9I6-F1	AF-A0A1D6K9I6-F1-model_v1	ALPHAFOLD V2.0 PREDICTION FOR PUTATIVE WEB FAMILY PROTEIN CHLOROPLASTIC (A0A1D6K9I6)	MOL_ID: 1; ORGANISM_SCIENTIFIC: ZEA MAYS; ORGANISM_TAXID: 4577	01-JUL-21	12-OCT-21	n/a	106335	0.729	2.5	0.025	2.97	0.0039	8.56	0.011	49.1	0.78	108	43.39	12.5	10.64	69.9	0	71.67	1.26168
Q9H2F9-F1	AF-Q9H2F9-F1-model_v1	ALPHAFOLD V2.0 PREDICTION FOR COILED-COIL DOMAIN-CONTAINING PROTEIN 68 (Q9H2F9)	MOL_ID: 1; ORGANISM_SCIENTIFIC: HOMO SAPIENS; ORGANISM_TAXID: 9606	01-JUL-21	12-OCT-21	n/a	38882.8	0.738	4.67	0.047	1.96	0.0026	4.59	0.006	20.8	0.33	57.9	22.86	6.09	5.79	74.2	0	80.6	1.26144
Q5Z9G7-F1	AF-Q5Z9G7-F1-model_v1	ALPHAFOLD V2.0 PREDICTION FOR OS06G0710001 PROTEIN (Q5Z9G7)	MOL_ID: 1; ORGANISM_SCIENTIFIC: ORYZA SATIVA SUBSP. JAPONICA; ORGANISM_TAXID: 39947	01-JUL-21	12-OCT-21	n/a	8317.3	0.743	8.13	0.082	0.716	0.00092	2.64	0.0034	17.9	0.28	33.3	11.99	5.35	4.16	25.3	0	67.23	1.26136
A0A1P8B4L7-F1	AF-A0A1P8B4L7-F1-model_v1	ALPHAFOLD V2.0 PREDICTION FOR UNCHARACTERIZED PROTEIN (A0A1P8B4L7)	MOL_ID: 1; ORGANISM_SCIENTIFIC: ARABIDOPSIS THALIANA; ORGANISM_TAXID: 3702	01-JUL-21	12-OCT-21	n/a	7528.9	0.738	9.66	0.097	0.786	0.001	2.22	0.0028	12.2	0.19	28	9.59	3.03	3.01	76.9	0	66.38	1.26126
Q96KP6-F1	AF-Q96KP6-F1-model_v1	ALPHAFOLD V2.0 PREDICTION FOR TNFAIP3-INTERACTING PROTEIN 3 (Q96KP6)	MOL_ID: 1; ORGANISM_SCIENTIFIC: HOMO SAPIENS; ORGANISM_TAXID: 9606	01-JUL-21	12-OCT-21	n/a	38950.3	0.725	4.3	0.043	1.9	0.0024	4.98	0.0063	26.1	0.41	62.8	23.39	8.13	5.93	71	0	79.02	1.26104
Q4UJ75-F1	AF-Q4UJ75-F1-model_v1	ALPHAFOLD V2.0 PREDICTION FOR PUTATIVE ANKYRIN REPEAT DOMAIN-CONTAINING PROTEIN 20A4 (Q4UJ75)	MOL_ID: 1; ORGANISM_SCIENTIFIC: HOMO SAPIENS; ORGANISM_TAXID: 9606	01-JUL-21	12-OCT-21	n/a	94173.5	0.733	2.94	0.03	3.05	0.0041	7.28	0.0098	35.1	0.56	91.8	38.14	10.46	8.9	59.6	0	70.51	1.26099
Q9P1Q0-F1	AF-Q9P1Q0-F1-model_v1	ALPHAFOLD V2.0 PREDICTION FOR VACUOLAR PROTEIN SORTING-ASSOCIATED PROTEIN 54 (Q9P1Q0)	MOL_ID: 1; ORGANISM_SCIENTIFIC: HOMO SAPIENS; ORGANISM_TAXID: 9606	01-JUL-21	12-OCT-21	n/a	110597	0.741	3.31	0.033	3.91	0.0049	6.48	0.0081	20	0.31	81.7	30.26	9.94	7.54	60.1	0.4	74.84	1.2608
A4HTS8-F1	AF-A4HTS8-F1-model_v1	ALPHAFOLD V2.0 PREDICTION FOR CALMODULIN-LIKE_PROTEIN_CONTAINING_EF_HAND_DOMAIN (A4HTS8)	MOL_ID: 1; ORGANISM_SCIENTIFIC: LEISHMANIA INFANTUM; ORGANISM_TAXID: 5671	01-JUL-21	12-OCT-21	n/a	65648.3	0.721	3.86	0.039	2.91	0.004	5.56	0.0076	22.8	0.36	70.1	30.63	7.49	6.86	66.6	5	82.98	1.26079
Q552S6-F1	AF-Q552S6-F1-model_v1	ALPHAFOLD V2.0 PREDICTION FOR UNCHARACTERIZED PROTEIN (Q552S6)	MOL_ID: 1; ORGANISM_SCIENTIFIC: DICTYOSTELIUM DISCOIDEUM; ORGANISM_TAXID: 44689	01-JUL-21	12-OCT-21	n/a	9319.1	0.742	8.34	0.084	0.827	0.001	2.57	0.0032	15	0.24	32.4	10.81	5.72	3.83	38.3	0	57.49	1.2607
K7KHU7-F1	AF-K7KHU7-F1-model_v1	ALPHAFOLD V2.0 PREDICTION FOR UNCHARACTERIZED PROTEIN (K7KHU7)	MOL_ID: 1; ORGANISM_SCIENTIFIC: GLYCINE MAX; ORGANISM_TAXID: 3847	01-JUL-21	12-OCT-21	1-20	25649.9	0.703	4.17	0.042	1.31	0.0017	5.14	0.0067	45.6	0.72	64.8	25.45	8.33	8.19	10	0	53.75	1.2607
M0R5Z6-F1	AF-M0R5Z6-F1-model_v1	ALPHAFOLD V2.0 PREDICTION FOR UNCHARACTERIZED PROTEIN (M0R5Z6)	MOL_ID: 1; ORGANISM_SCIENTIFIC: RATTUS NORVEGICUS; ORGANISM_TAXID: 10116	01-JUL-21	12-OCT-21	n/a	108921	0.704	3.38	0.034	4.49	0.0059	6.34	0.0083	21.1	0.33	79.9	31.41	8.55	7.98	2.3	18.7	55.71	1.26025
A6NLI5-F1	AF-A6NLI5-F1-model_v1	ALPHAFOLD V2.0 PREDICTION FOR TRIPARTITE MOTIF-CONTAINING PROTEIN 64C (A6NLI5)	MOL_ID: 1; ORGANISM_SCIENTIFIC: HOMO SAPIENS; ORGANISM_TAXID: 9606	01-JUL-21	12-OCT-21	n/a	51533.5	0.728	5.02	0.051	2.9	0.0036	4.27	0.0053	12.4	0.19	53.8	18.92	6.69	4.48	39.2	15.8	84.37	1.25995
E3CTH4-F1	AF-E3CTH4-F1-model_v1	ALPHAFOLD V2.0 PREDICTION FOR UNCHARACTERIZED PROTEIN (E3CTH4)	MOL_ID: 1; ORGANISM_SCIENTIFIC: CAENORHABDITIS ELEGANS; ORGANISM_TAXID: 6239	01-JUL-21	12-OCT-21	n/a	13813.4	0.738	7.63	0.077	1.14	0.0014	2.81	0.0034	13.2	0.21	35.4	12.11	4.51	3.71	86.7	0	71.53	1.25979
A0A1D6JKU2-F1	AF-A0A1D6JKU2-F1-model_v1	ALPHAFOLD V2.0 PREDICTION FOR PROTEIN WEAK CHLOROPLAST MOVEMENT UNDER BLUE LIGHT 1 (A0A1D6JKU2)	MOL_ID: 1; ORGANISM_SCIENTIFIC: ZEA MAYS; ORGANISM_TAXID: 4577	01-JUL-21	12-OCT-21	n/a	76785.9	0.728	2.91	0.029	2.51	0.0033	7.36	0.0098	44.1	0.7	92.7	37.49	14.74	10.77	70.8	0	76.06	1.25951
Q4DT95-F1	AF-Q4DT95-F1-model_v1	ALPHAFOLD V2.0 PREDICTION FOR UNCHARACTERIZED PROTEIN (Q4DT95)	MOL_ID: 1; ORGANISM_SCIENTIFIC: TRYPANOSOMA CRUZI (STRAIN CL BRENER); ORGANISM_TAXID: 353153	01-JUL-21	12-OCT-21	n/a	16360.4	0.763	7.23	0.073	1.16	0.0014	2.97	0.0036	13.4	0.21	37.4	13.05	6.07	3.42	85.3	0	66.15	1.25926
A0A0R4IKF0-F1	AF-A0A0R4IKF0-F1-model_v1	ALPHAFOLD V2.0 PREDICTION FOR APOLIPOPROTEIN A-IB (A0A0R4IKF0)	MOL_ID: 1; ORGANISM_SCIENTIFIC: DANIO RERIO; ORGANISM_TAXID: 7955	01-JUL-21	12-OCT-21	1-18	28215.7	0.74	5.14	0.052	1.55	0.0016	4.17	0.0044	18.9	0.29	52.5	14.4	10.09	3.71	91.2	0	77.73	1.25899
O43908-F1	AF-O43908-F1-model_v1	ALPHAFOLD V2.0 PREDICTION FOR NKG2-F TYPE II INTEGRAL MEMBRANE PROTEIN (O43908)	MOL_ID: 1; ORGANISM_SCIENTIFIC: HOMO SAPIENS; ORGANISM_TAXID: 9606	01-JUL-21	12-OCT-21	n/a	18244.9	0.739	5.91	0.06	1.16	0.0014	3.63	0.0044	20.7	0.32	45.7	14.29	8.14	4.28	33.8	3.8	58.89	1.25895
A0A2R8Q5A0-F1	AF-A0A2R8Q5A0-F1-model_v1	ALPHAFOLD V2.0 PREDICTION FOR SUMO-SPECIFIC PEPTIDASE 7A (A0A2R8Q5A0)	MOL_ID: 1; ORGANISM_SCIENTIFIC: DANIO RERIO; ORGANISM_TAXID: 7955	01-JUL-21	12-OCT-21	n/a	67245.8	0.749	4.74	0.048	3.3	0.004	4.52	0.0054	10.8	0.17	56.9	19.3	8.19	4.83	29.5	13.4	80.88	1.25885
Q9C1W6-F1	AF-Q9C1W6-F1-model_v1	ALPHAFOLD V2.0 PREDICTION FOR UNCHARACTERIZED PROTEIN C713.09 (Q9C1W6)	MOL_ID: 1; ORGANISM_SCIENTIFIC: SCHIZOSACCHAROMYCES POMBE (STRAIN 972 / ATCC 24843); ORGANISM_TAXID: 284812	01-JUL-21	12-OCT-21	n/a	44754.2	0.726	4.2	0.042	2.12	0.0026	5.1	0.0063	25.1	0.39	64.2	23.95	5.93	6.16	58.9	0	74.96	1.25882
P19012-F1	AF-P19012-F1-model_v1	ALPHAFOLD V2.0 PREDICTION FOR KERATIN, TYPE I CYTOSKELETAL 15 (P19012)	MOL_ID: 1; ORGANISM_SCIENTIFIC: HOMO SAPIENS; ORGANISM_TAXID: 9606	01-JUL-21	12-OCT-21	n/a	49194.6	0.724	3.93	0.04	2.2	0.0027	5.45	0.0067	26.3	0.41	68.6	24.82	8.55	6.37	65.7	3.7	74.2	1.25872
Q4DXF6-F1	AF-Q4DXF6-F1-model_v1	ALPHAFOLD V2.0 PREDICTION FOR PROTEIN KINASE C SUBSTRATE PROTEIN, HEAVY CHAIN, PUTATIVE (Q4DXF6)	MOL_ID: 1; ORGANISM_SCIENTIFIC: TRYPANOSOMA CRUZI (STRAIN CL BRENER); ORGANISM_TAXID: 353153	01-JUL-21	12-OCT-21	1-17	21937.4	0.72	6.68	0.067	1.69	0.0021	3.21	0.004	12.6	0.2	40.4	14.24	5.47	4.39	47.4	2.1	94.14	1.25857
Q3E965-F1	AF-Q3E965-F1-model_v1	ALPHAFOLD V2.0 PREDICTION FOR PROTEIN GLUTAMINE DUMPER 5 (Q3E965)	MOL_ID: 1; ORGANISM_SCIENTIFIC: ARABIDOPSIS THALIANA; ORGANISM_TAXID: 3702	01-JUL-21	12-OCT-21	n/a	14685.3	0.738	6.1	0.062	0.967	0.0013	3.52	0.0047	26.6	0.42	44.3	18.35	5.77	5.25	30.8	3.1	64.3	1.25852
O57409-F1	AF-O57409-F1-model_v1	ALPHAFOLD V2.0 PREDICTION FOR DELTA-LIKE PROTEIN B (O57409)	MOL_ID: 1; ORGANISM_SCIENTIFIC: DANIO RERIO; ORGANISM_TAXID: 7955	01-JUL-21	12-OCT-21	1-20	65390.3	0.709	3.82	0.038	3	0.0035	5.61	0.0066	20.4	0.32	70.6	20.96	16.51	6.25	10.8	17.9	81.16	1.25847
I1MZ92-F1	AF-I1MZ92-F1-model_v1	ALPHAFOLD V2.0 PREDICTION FOR PHYTOCYANIN DOMAIN-CONTAINING PROTEIN (I1MZ92)	MOL_ID: 1; ORGANISM_SCIENTIFIC: GLYCINE MAX; ORGANISM_TAXID: 3847	01-JUL-21	12-OCT-21	1-23	14550	0.734	7.9	0.08	1.26	0.0017	2.71	0.0036	13	0.21	34.1	13.55	3.84	3.27	9.1	16.7	89.23	1.2583
A0A1D6FJS0-F1	AF-A0A1D6FJS0-F1-model_v1	ALPHAFOLD V2.0 PREDICTION FOR UNCHARACTERIZED PROTEIN (A0A1D6FJS0)	MOL_ID: 1; ORGANISM_SCIENTIFIC: ZEA MAYS; ORGANISM_TAXID: 4577	01-JUL-21	12-OCT-21	n/a	5629.2	0.721	11.5	0.12	0.744	0.00091	1.86	0.0023	9.44	0.15	23.4	8.59	2.13	1.98	84	0	90.44	1.25806
I1N673-F1	AF-I1N673-F1-model_v1	ALPHAFOLD V2.0 PREDICTION FOR GOLD DOMAIN-CONTAINING PROTEIN (I1N673)	MOL_ID: 1; ORGANISM_SCIENTIFIC: GLYCINE MAX; ORGANISM_TAXID: 3847	01-JUL-21	12-OCT-21	1-25	21998.7	0.735	6.73	0.068	1.62	0.0021	3.18	0.004	12.5	0.2	40	14	5.19	3.93	44.7	26.3	88.03	1.25786
Q13070-F1	AF-Q13070-F1-model_v1	ALPHAFOLD V2.0 PREDICTION FOR G ANTIGEN 6 (Q13070)	MOL_ID: 1; ORGANISM_SCIENTIFIC: HOMO SAPIENS; ORGANISM_TAXID: 9606	01-JUL-21	12-OCT-21	n/a	12876.4	0.698	6.07	0.061	0.972	0.0012	3.53	0.0044	27.7	0.43	44.4	16.36	5.49	5.23	4.3	0	62.58	1.25779
D3ZYQ9-F1	AF-D3ZYQ9-F1-model_v1	ALPHAFOLD V2.0 PREDICTION FOR E3 UBIQUITIN PROTEIN LIGASE (D3ZYQ9)	MOL_ID: 1; ORGANISM_SCIENTIFIC: RATTUS NORVEGICUS; ORGANISM_TAXID: 10116	01-JUL-21	12-OCT-21	n/a	113462	0.731	2.67	0.027	3.36	0.0044	8.03	0.011	38.8	0.61	101	40.92	13.77	10.34	76.8	0.6	75.4	1.25778
Q8WWM1-F1	AF-Q8WWM1-F1-model_v1	ALPHAFOLD V2.0 PREDICTION FOR X ANTIGEN FAMILY MEMBER 5 (Q8WWM1)	MOL_ID: 1; ORGANISM_SCIENTIFIC: HOMO SAPIENS; ORGANISM_TAXID: 9606	01-JUL-21	12-OCT-21	n/a	12073.3	0.718	6.57	0.066	0.922	0.0012	3.26	0.0041	23.8	0.37	41	15.52	4.82	3.46	17.8	0	62.25	1.25767
Q9Y5G6-F1	AF-Q9Y5G6-F1-model_v1	ALPHAFOLD V2.0 PREDICTION FOR PROTOCADHERIN GAMMA-A7 (Q9Y5G6)	MOL_ID: 1; ORGANISM_SCIENTIFIC: HOMO SAPIENS; ORGANISM_TAXID: 9606	01-JUL-21	12-OCT-21	1-28	98584.7	0.732	3.27	0.033	3.56	0.0044	6.56	0.0081	22.4	0.35	82.5	29.3	12.6	8.85	9.2	25.5	76.06	1.25762
Q9JJM7-F1	AF-Q9JJM7-F1-model_v1	ALPHAFOLD V2.0 PREDICTION FOR PLATELET GLYCOPROTEIN IB BETA CHAIN (Q9JJM7)	MOL_ID: 1; ORGANISM_SCIENTIFIC: RATTUS NORVEGICUS; ORGANISM_TAXID: 10116	01-JUL-21	12-OCT-21	1-26	19564.5	0.748	7.18	0.072	1.46	0.0019	2.99	0.004	12.4	0.2	37.6	14.47	4.2	3.34	43	4.5	90.6	1.25753
A0A0P0VHB2-F1	AF-A0A0P0VHB2-F1-model_v1	ALPHAFOLD V2.0 PREDICTION FOR OS02G0265100 PROTEIN (A0A0P0VHB2)	MOL_ID: 1; ORGANISM_SCIENTIFIC: ORYZA SATIVA SUBSP. JAPONICA; ORGANISM_TAXID: 39947	01-JUL-21	12-OCT-21	n/a	10832	0.715	7.18	0.072	0.913	0.0011	2.99	0.0035	19.4	0.3	37.6	10.76	8.45	3.86	38.5	0	59.28	1.25753
A0A2R8Q572-F1	AF-A0A2R8Q572-F1-model_v1	ALPHAFOLD V2.0 PREDICTION FOR SI:CH211-1F22.16 (A0A2R8Q572)	MOL_ID: 1; ORGANISM_SCIENTIFIC: DANIO RERIO; ORGANISM_TAXID: 7955	01-JUL-21	12-OCT-21	1-23	55835.8	0.722	4.59	0.046	2.94	0.0035	4.66	0.0055	14.7	0.23	58.6	19.91	7.89	4.89	15	24.9	75.5	1.25751
F6WIE4-F1	AF-F6WIE4-F1-model_v1	ALPHAFOLD V2.0 PREDICTION FOR PREDICTED GENE 10563 (F6WIE4)	MOL_ID: 1; ORGANISM_SCIENTIFIC: MUS MUSCULUS; ORGANISM_TAXID: 10090	01-JUL-21	12-OCT-21	n/a	10860.1	0.732	8	0.081	0.96	0.0012	2.68	0.0034	14.6	0.23	33.7	11.96	4.26	2.67	91	0	96.13	1.25746
A0A096LNW5-F1	AF-A0A096LNW5-F1-model_v1	ALPHAFOLD V2.0 PREDICTION FOR NOTCH 2 N-TERMINAL-LIKE R (PSEUDOGENE) (A0A096LNW5)	MOL_ID: 1; ORGANISM_SCIENTIFIC: HOMO SAPIENS; ORGANISM_TAXID: 9606	01-JUL-21	12-OCT-21	1-25	27294.4	0.703	6.34	0.064	2.12	0.0025	3.38	0.004	11.3	0.18	42.5	13.93	6.11	4.87	10.9	16.9	87.37	1.2574
A0A0R0LEU9-F1	AF-A0A0R0LEU9-F1-model_v1	ALPHAFOLD V2.0 PREDICTION FOR UNCHARACTERIZED PROTEIN (A0A0R0LEU9)	MOL_ID: 1; ORGANISM_SCIENTIFIC: GLYCINE MAX; ORGANISM_TAXID: 3847	01-JUL-21	12-OCT-21	n/a	4948.7	0.778	12.5	0.13	0.567	0.00072	1.71	0.0022	8.79	0.14	21.5	8.09	1.81	1.68	91.5	0	92.74	1.25731
Q96KF7-F1	AF-Q96KF7-F1-model_v1	ALPHAFOLD V2.0 PREDICTION FOR SMALL INTEGRAL MEMBRANE PROTEIN 8 (Q96KF7)	MOL_ID: 1; ORGANISM_SCIENTIFIC: HOMO SAPIENS; ORGANISM_TAXID: 9606	01-JUL-21	12-OCT-21	n/a	11064.9	0.741	7.54	0.076	0.891	0.0012	2.84	0.0038	18.3	0.29	35.7	13.68	4.08	3.82	36.5	8.3	67.76	1.25704
Q94195-F1	AF-Q94195-F1-model_v1	ALPHAFOLD V2.0 PREDICTION FOR UNCHARACTERIZED PROTEIN (Q94195)	MOL_ID: 1; ORGANISM_SCIENTIFIC: CAENORHABDITIS ELEGANS; ORGANISM_TAXID: 6239	01-JUL-21	12-OCT-21	n/a	14924	0.744	7.14	0.072	1.13	0.0013	3	0.0035	14.5	0.23	37.7	12.55	4.4	4.36	27.5	12.2	68.41	1.25667
B9EKI3-F1	AF-B9EKI3-F1-model_v1	ALPHAFOLD V2.0 PREDICTION FOR TATA ELEMENT MODULATORY FACTOR (B9EKI3)	MOL_ID: 1; ORGANISM_SCIENTIFIC: MUS MUSCULUS; ORGANISM_TAXID: 10090	01-JUL-21	12-OCT-21	n/a	121757	0.725	2.28	0.023	3.15	0.0041	9.39	0.012	55.6	0.88	118	47.67	12.79	12.43	54.9	0	65.49	1.25666
O94832-F1	AF-O94832-F1-model_v1	ALPHAFOLD V2.0 PREDICTION FOR UNCONVENTIONAL MYOSIN-ID (O94832)	MOL_ID: 1; ORGANISM_SCIENTIFIC: HOMO SAPIENS; ORGANISM_TAXID: 9606	01-JUL-21	12-OCT-21	n/a	116265	0.741	4.01	0.04	4.98	0.0059	5.34	0.0063	10.4	0.16	67.1	22.41	8.94	7.57	44.7	14.1	88.32	1.25655
C8JQN9-F1	AF-C8JQN9-F1-model_v1	ALPHAFOLD V2.0 PREDICTION FOR UNCHARACTERIZED PROTEIN (C8JQN9)	MOL_ID: 1; ORGANISM_SCIENTIFIC: CAENORHABDITIS ELEGANS; ORGANISM_TAXID: 6239	01-JUL-21	12-OCT-21	n/a	7550.3	0.767	9.33	0.094	0.678	0.00083	2.3	0.0028	13.2	0.21	28.9	10.03	4.15	2.52	54.7	0	74.29	1.25652
Q54W55-F1	AF-Q54W55-F1-model_v1	ALPHAFOLD V2.0 PREDICTION FOR B BOX-TYPE DOMAIN-CONTAINING PROTEIN (Q54W55)	MOL_ID: 1; ORGANISM_SCIENTIFIC: DICTYOSTELIUM DISCOIDEUM; ORGANISM_TAXID: 44689	01-JUL-21	12-OCT-21	n/a	45843.7	0.737	5.05	0.051	2.51	0.0031	4.25	0.0052	13.7	0.21	53.4	18.07	8.96	4.93	39.5	9.6	86.32	1.25647
I1JHH7-F1	AF-I1JHH7-F1-model_v1	ALPHAFOLD V2.0 PREDICTION FOR UNCHARACTERIZED PROTEIN (I1JHH7)	MOL_ID: 1; ORGANISM_SCIENTIFIC: GLYCINE MAX; ORGANISM_TAXID: 3847	01-JUL-21	12-OCT-21	n/a	6660.2	0.749	11	0.11	0.756	0.00094	1.95	0.0024	9.28	0.15	24.5	8.92	2.28	1.94	94.4	0	77.66	1.25641
A0A0P0WIH8-F1	AF-A0A0P0WIH8-F1-model_v1	ALPHAFOLD V2.0 PREDICTION FOR OS05G0172800 PROTEIN (A0A0P0WIH8)	MOL_ID: 1; ORGANISM_SCIENTIFIC: ORYZA SATIVA SUBSP. JAPONICA; ORGANISM_TAXID: 39947	01-JUL-21	12-OCT-21	n/a	8093.7	0.741	7.74	0.078	0.669	0.00082	2.77	0.0034	21.1	0.33	34.8	12.14	5.73	2.34	4.2	0	56.08	1.25632
A0A3B3IT33-F1	AF-A0A3B3IT33-F1-model_v1	ALPHAFOLD V2.0 PREDICTION FOR TRIPARTITE MOTIF-CONTAINING 51G, PSEUDOGENE (A0A3B3IT33)	MOL_ID: 1; ORGANISM_SCIENTIFIC: HOMO SAPIENS; ORGANISM_TAXID: 9606	01-JUL-21	12-OCT-21	n/a	53057.6	0.73	4.9	0.049	2.89	0.0036	4.37	0.0055	12.7	0.2	54.9	18.84	7.22	4.67	39.9	14.6	86.45	1.25629
A0A0P0WTX7-F1	AF-A0A0P0WTX7-F1-model_v1	ALPHAFOLD V2.0 PREDICTION FOR OS06G0192001 PROTEIN (A0A0P0WTX7)	MOL_ID: 1; ORGANISM_SCIENTIFIC: ORYZA SATIVA SUBSP. JAPONICA; ORGANISM_TAXID: 39947	01-JUL-21	12-OCT-21	n/a	12989	0.702	5.97	0.06	0.952	0.0012	3.59	0.0044	29.1	0.45	45.1	16.87	6.09	4.06	2.6	0	57.04	1.25627
O44173-F1	AF-O44173-F1-model_v1	ALPHAFOLD V2.0 PREDICTION FOR COL_CUTICLE_N DOMAIN-CONTAINING PROTEIN (O44173)	MOL_ID: 1; ORGANISM_SCIENTIFIC: CAENORHABDITIS ELEGANS; ORGANISM_TAXID: 6239	01-JUL-21	12-OCT-21	n/a	29273.9	0.721	4.86	0.049	1.64	0.0022	4.41	0.006	25.4	0.41	55.4	22.5	9.44	5.68	23.5	0	72.49	1.25624
Q9Y5G7-F1	AF-Q9Y5G7-F1-model_v1	ALPHAFOLD V2.0 PREDICTION FOR PROTOCADHERIN GAMMA-A6 (Q9Y5G7)	MOL_ID: 1; ORGANISM_SCIENTIFIC: HOMO SAPIENS; ORGANISM_TAXID: 9606	01-JUL-21	12-OCT-21	1-29	97735.8	0.734	3.29	0.033	3.52	0.0044	6.52	0.0081	22.4	0.35	81.9	29.59	10.1	11.23	9.7	24.8	75.8	1.25613
Q8IZT9-F1	AF-Q8IZT9-F1-model_v1	ALPHAFOLD V2.0 PREDICTION FOR PROTEIN FAM9C (Q8IZT9)	MOL_ID: 1; ORGANISM_SCIENTIFIC: HOMO SAPIENS; ORGANISM_TAXID: 9606	01-JUL-21	12-OCT-21	n/a	19204.4	0.726	5.71	0.058	1.24	0.0016	3.75	0.0047	22.5	0.35	47.1	17.37	5.85	4.71	70.9	0	77.69	1.256
B6TD00-F1	AF-B6TD00-F1-model_v1	ALPHAFOLD V2.0 PREDICTION FOR FAS-ASSOCIATED FACTOR 1-LIKE PROTEIN (B6TD00)	MOL_ID: 1; ORGANISM_SCIENTIFIC: ZEA MAYS; ORGANISM_TAXID: 4577	01-JUL-21	12-OCT-21	n/a	50816.9	0.731	4.5	0.045	2.53	0.003	4.77	0.0057	16.1	0.25	59.9	18.62	10.25	6.82	41.9	10.8	76.81	1.25577
Q9Y5H3-F1	AF-Q9Y5H3-F1-model_v1	ALPHAFOLD V2.0 PREDICTION FOR PROTOCADHERIN GAMMA-A10 (Q9Y5H3)	MOL_ID: 1; ORGANISM_SCIENTIFIC: HOMO SAPIENS; ORGANISM_TAXID: 9606	01-JUL-21	12-OCT-21	1-32	97937.5	0.732	3.24	0.033	3.51	0.0043	6.61	0.0081	23.1	0.36	83	29.47	13.32	8.82	7.9	24.8	75.84	1.25567
C7FZS8-F1	AF-C7FZS8-F1-model_v1	ALPHAFOLD V2.0 PREDICTION FOR UNCHARACTERIZED PROTEIN (C7FZS8)	MOL_ID: 1; ORGANISM_SCIENTIFIC: CAENORHABDITIS ELEGANS; ORGANISM_TAXID: 6239	01-JUL-21	12-OCT-21	n/a	7711	0.732	9.62	0.097	0.82	0.00098	2.23	0.0027	11.6	0.18	28	9.43	4.01	2.77	80.3	0	86.11	1.25561
A0A0P0XDY7-F1	AF-A0A0P0XDY7-F1-model_v1	ALPHAFOLD V2.0 PREDICTION FOR OS08G0289266 PROTEIN (A0A0P0XDY7)	MOL_ID: 1; ORGANISM_SCIENTIFIC: ORYZA SATIVA SUBSP. JAPONICA; ORGANISM_TAXID: 39947	01-JUL-21	12-OCT-21	n/a	12082.5	0.747	7.2	0.073	0.908	0.0012	2.98	0.0039	18.4	0.29	37.4	14.76	5.15	2.99	44.5	0	69.15	1.25503
Q9JMA4-F1	AF-Q9JMA4-F1-model_v1	ALPHAFOLD V2.0 PREDICTION FOR KILLER CELL LECTIN-LIKE RECEPTOR, SUBFAMILY A, MEMBER 17 (Q9JMA4)	MOL_ID: 1; ORGANISM_SCIENTIFIC: MUS MUSCULUS; ORGANISM_TAXID: 10090	01-JUL-21	12-OCT-21	n/a	31794.3	0.733	5.25	0.053	1.84	0.0023	4.08	0.0052	17.8	0.28	51.2	18.18	6.23	4.8	39.3	13.2	78.52	1.2549
A0A087WQC7-F1	AF-A0A087WQC7-F1-model_v1	ALPHAFOLD V2.0 PREDICTION FOR PREDICTED GENE, 20736 (A0A087WQC7)	MOL_ID: 1; ORGANISM_SCIENTIFIC: MUS MUSCULUS; ORGANISM_TAXID: 10090	01-JUL-21	12-OCT-21	n/a	25659.2	0.727	5.2	0.052	1.5	0.002	4.12	0.0054	22.7	0.36	51.7	20.62	6.22	4.94	58.8	5.4	75.49	1.25485
A0A1D6NLK6-F1	AF-A0A1D6NLK6-F1-model_v1	ALPHAFOLD V2.0 PREDICTION FOR UNCHARACTERIZED PROTEIN (A0A1D6NLK6)	MOL_ID: 1; ORGANISM_SCIENTIFIC: ZEA MAYS; ORGANISM_TAXID: 4577	01-JUL-21	12-OCT-21	1-22	12840.9	0.725	6.9	0.07	1.01	0.0012	3.1	0.0037	18.2	0.28	38.9	13.58	5.55	4.31	14.4	0	62.99	1.25484
A0A1D6MXJ6-F1	AF-A0A1D6MXJ6-F1-model_v1	ALPHAFOLD V2.0 PREDICTION FOR PUTATIVE U3 SMALL NUCLEOLAR RNA-ASSOCIATED PROTEIN 11 (A0A1D6MXJ6)	MOL_ID: 1; ORGANISM_SCIENTIFIC: ZEA MAYS; ORGANISM_TAXID: 4577	01-JUL-21	12-OCT-21	n/a	6146.8	0.742	10.1	0.1	0.66	0.00081	2.12	0.0026	13.1	0.21	26.6	9.68	3.24	2.74	49	0	74.31	1.25472
A0A2R8RLA9-F1	AF-A0A2R8RLA9-F1-model_v1	ALPHAFOLD V2.0 PREDICTION FOR CADHERIN_2 DOMAIN-CONTAINING PROTEIN (A0A2R8RLA9)	MOL_ID: 1; ORGANISM_SCIENTIFIC: DANIO RERIO; ORGANISM_TAXID: 7955	01-JUL-21	12-OCT-21	1-26	6583.8	0.73	10.1	0.1	0.74	0.00092	2.12	0.0026	12.1	0.19	26.6	9.25	3.14	2.32	71.9	0	69.03	1.25472
A0A1D6I2Q2-F1	AF-A0A1D6I2Q2-F1-model_v1	ALPHAFOLD V2.0 PREDICTION FOR SYNTAXIN-72 (A0A1D6I2Q2)	MOL_ID: 1; ORGANISM_SCIENTIFIC: ZEA MAYS; ORGANISM_TAXID: 4577	01-JUL-21	12-OCT-21	n/a	27753.2	0.739	5.4	0.054	1.61	0.0021	3.97	0.0052	19.3	0.31	49.8	18.91	6.06	4.54	83.1	0	74.43	1.25441
I1K6D1-F1	AF-I1K6D1-F1-model_v1	ALPHAFOLD V2.0 PREDICTION FOR LEA_2 DOMAIN-CONTAINING PROTEIN (I1K6D1)	MOL_ID: 1; ORGANISM_SCIENTIFIC: GLYCINE MAX; ORGANISM_TAXID: 3847	01-JUL-21	12-OCT-21	n/a	24808.5	0.745	6.27	0.063	1.64	0.0022	3.42	0.0045	15.1	0.24	42.9	17.22	5.27	3.66	28.7	34.5	82.44	1.25439
K7LK81-F1	AF-K7LK81-F1-model_v1	ALPHAFOLD V2.0 PREDICTION FOR UNCHARACTERIZED PROTEIN (K7LK81)	MOL_ID: 1; ORGANISM_SCIENTIFIC: GLYCINE MAX; ORGANISM_TAXID: 3847	01-JUL-21	12-OCT-21	n/a	8107	0.745	9.07	0.091	0.773	0.00093	2.36	0.0029	13.2	0.21	29.6	9.4	4.39	4.07	65.7	0	72.06	1.25424
A6NGS2-F1	AF-A6NGS2-F1-model_v1	ALPHAFOLD V2.0 PREDICTION FOR GLUTAMATE-RICH PROTEIN 4 (A6NGS2)	MOL_ID: 1; ORGANISM_SCIENTIFIC: HOMO SAPIENS; ORGANISM_TAXID: 9606	01-JUL-21	12-OCT-21	n/a	14461.6	0.732	7.07	0.071	1.13	0.0015	3.03	0.0039	16.7	0.26	38	13.86	6.05	2.87	53.5	0	78.61	1.25413
Q8N112-F1	AF-Q8N112-F1-model_v1	ALPHAFOLD V2.0 PREDICTION FOR LEUCINE-RICH SINGLE-PASS MEMBRANE PROTEIN 2 (Q8N112)	MOL_ID: 1; ORGANISM_SCIENTIFIC: HOMO SAPIENS; ORGANISM_TAXID: 9606	01-JUL-21	12-OCT-21	n/a	17867.6	0.746	5.86	0.059	1.1	0.0014	3.66	0.0045	21.7	0.34	45.9	17.07	7.69	3.23	47.9	0	66.52	1.2541
I1ME16-F1	AF-I1ME16-F1-model_v1	ALPHAFOLD V2.0 PREDICTION FOR GTD-BINDING DOMAIN-CONTAINING PROTEIN (I1ME16)	MOL_ID: 1; ORGANISM_SCIENTIFIC: GLYCINE MAX; ORGANISM_TAXID: 3847	01-JUL-21	12-OCT-21	n/a	31252.5	0.733	4.94	0.05	1.7	0.0021	4.33	0.0055	21.5	0.34	54.3	20.29	6.52	6.11	68.9	0	75.9	1.25404
A0A0P0UX53-F1	AF-A0A0P0UX53-F1-model_v1	ALPHAFOLD V2.0 PREDICTION FOR OS01G0102850 PROTEIN (A0A0P0UX53)	MOL_ID: 1; ORGANISM_SCIENTIFIC: ORYZA SATIVA SUBSP. JAPONICA; ORGANISM_TAXID: 39947	01-JUL-21	12-OCT-21	n/a	4231.1	0.723	11.3	0.11	0.548	0.00067	1.89	0.0023	13.1	0.21	23.7	7.73	4.29	2.07	18.9	0	63.85	1.25397
A0A0R0KYN6-F1	AF-A0A0R0KYN6-F1-model_v1	ALPHAFOLD V2.0 PREDICTION FOR UNCHARACTERIZED PROTEIN (A0A0R0KYN6)	MOL_ID: 1; ORGANISM_SCIENTIFIC: GLYCINE MAX; ORGANISM_TAXID: 3847	01-JUL-21	12-OCT-21	n/a	6243.3	0.762	11.1	0.11	0.68	0.00085	1.93	0.0024	9.61	0.15	24.2	8.77	2.36	2.11	94.4	0	67.32	1.25389
Q7YWX8-F1	AF-Q7YWX8-F1-model_v1	ALPHAFOLD V2.0 PREDICTION FOR UNCHARACTERIZED PROTEIN (Q7YWX8)	MOL_ID: 1; ORGANISM_SCIENTIFIC: CAENORHABDITIS ELEGANS; ORGANISM_TAXID: 6239	01-JUL-21	12-OCT-21	n/a	13492.6	0.727	6.56	0.066	0.996	0.0012	3.27	0.004	21.5	0.34	41	15.05	7.07	4.22	40.6	0	61.57	1.25382
B6TA44-F1	AF-B6TA44-F1-model_v1	ALPHAFOLD V2.0 PREDICTION FOR VACUOLAR ATPASE ASSEMBLY INTEGRAL MEMBRANE PROTEIN VMA21 HOMOLOG (B6TA44)	MOL_ID: 1; ORGANISM_SCIENTIFIC: ZEA MAYS; ORGANISM_TAXID: 4577	01-JUL-21	12-OCT-21	n/a	11570.3	0.741	7.99	0.081	0.987	0.0013	2.68	0.0035	15.1	0.24	33.6	13	3.55	2.65	66	0	73.99	1.25373
P0DMP2-F1	AF-P0DMP2-F1-model_v1	ALPHAFOLD V2.0 PREDICTION FOR SLIT-ROBO RHO GTPASE-ACTIVATING PROTEIN 2B (P0DMP2)	MOL_ID: 1; ORGANISM_SCIENTIFIC: HOMO SAPIENS; ORGANISM_TAXID: 9606	01-JUL-21	12-OCT-21	n/a	53413.1	0.731	4.49	0.045	2.66	0.0035	4.77	0.0062	17.5	0.28	59.8	23.89	6.29	4.8	79	0	88.5	1.25367
A0A0G2JTE9-F1	AF-A0A0G2JTE9-F1-model_v1	ALPHAFOLD V2.0 PREDICTION FOR UNCHARACTERIZED PROTEIN (A0A0G2JTE9)	MOL_ID: 1; ORGANISM_SCIENTIFIC: RATTUS NORVEGICUS; ORGANISM_TAXID: 10116	01-JUL-21	12-OCT-21	n/a	17982.8	0.692	6.17	0.062	1.41	0.0018	3.47	0.0044	19	0.3	43.5	15.91	5.51	2.75	84.2	0	80.21	1.2536
Q9SW07-F1	AF-Q9SW07-F1-model_v1	ALPHAFOLD V2.0 PREDICTION FOR PROTEIN GLUTAMINE DUMPER 2 (Q9SW07)	MOL_ID: 1; ORGANISM_SCIENTIFIC: ARABIDOPSIS THALIANA; ORGANISM_TAXID: 3702	01-JUL-21	12-OCT-21	n/a	14219.8	0.722	6.17	0.062	1.01	0.0013	3.47	0.0045	26	0.41	43.5	16.9	6.84	4.77	26.6	0	62.41	1.2536
A0A1P8BAW4-F1	AF-A0A1P8BAW4-F1-model_v1	ALPHAFOLD V2.0 PREDICTION FOR UNCHARACTERIZED PROTEIN (A0A1P8BAW4)	MOL_ID: 1; ORGANISM_SCIENTIFIC: ARABIDOPSIS THALIANA; ORGANISM_TAXID: 3702	01-JUL-21	12-OCT-21	n/a	9243.4	0.729	7.66	0.077	0.791	0.001	2.8	0.0036	18.9	0.3	35.1	11.23	5.29	5.27	26.5	0	53.42	1.25357
A0A1P8B1C6-F1	AF-A0A1P8B1C6-F1-model_v1	ALPHAFOLD V2.0 PREDICTION FOR GRF ZINC FINGER PROTEIN (A0A1P8B1C6)	MOL_ID: 1; ORGANISM_SCIENTIFIC: ARABIDOPSIS THALIANA; ORGANISM_TAXID: 3702	01-JUL-21	12-OCT-21	n/a	14916.7	0.74	7.56	0.076	1.21	0.0015	2.84	0.0035	12.5	0.2	35.6	12.63	6.01	3.3	49.6	7.8	84.92	1.25352
Q86T20-F1	AF-Q86T20-F1-model_v1	ALPHAFOLD V2.0 PREDICTION FOR SMALL INTEGRAL MEMBRANE PROTEIN 29 (Q86T20)	MOL_ID: 1; ORGANISM_SCIENTIFIC: HOMO SAPIENS; ORGANISM_TAXID: 9606	01-JUL-21	12-OCT-21	n/a	11552.3	0.741	7.43	0.075	0.917	0.0012	2.88	0.0038	18.2	0.29	36.1	13.9	6.2	3.44	51.5	0	71.58	1.25347
I1K5K7-F1	AF-I1K5K7-F1-model_v1	ALPHAFOLD V2.0 PREDICTION FOR ANK_REP_REGION DOMAIN-CONTAINING PROTEIN (I1K5K7)	MOL_ID: 1; ORGANISM_SCIENTIFIC: GLYCINE MAX; ORGANISM_TAXID: 3847	01-JUL-21	12-OCT-21	n/a	58746	0.744	4.76	0.048	2.95	0.0036	4.5	0.0054	12.4	0.19	56.4	20.5	7.99	5.16	62.6	0	83.71	1.25333
A0A0P0WVD0-F1	AF-A0A0P0WVD0-F1-model_v1	ALPHAFOLD V2.0 PREDICTION FOR OS06G0272400 PROTEIN (A0A0P0WVD0)	MOL_ID: 1; ORGANISM_SCIENTIFIC: ORYZA SATIVA SUBSP. JAPONICA; ORGANISM_TAXID: 39947	01-JUL-21	12-OCT-21	n/a	10614.9	0.736	6.95	0.07	0.803	0.00099	3.08	0.0038	21.5	0.34	38.6	13.25	6.86	3.59	7.6	0	56.64	1.25325
Q9C037-F1	AF-Q9C037-F1-model_v1	ALPHAFOLD V2.0 PREDICTION FOR E3 UBIQUITIN-PROTEIN LIGASE TRIM4 (Q9C037)	MOL_ID: 1; ORGANISM_SCIENTIFIC: HOMO SAPIENS; ORGANISM_TAXID: 9606	01-JUL-21	12-OCT-21	n/a	57478.2	0.737	4.52	0.046	2.82	0.0035	4.74	0.0058	14.8	0.23	59.4	20.34	7.3	6.16	38.1	13.2	83.45	1.25316
Q3SWT0-F1	AF-Q3SWT0-F1-model_v1	ALPHAFOLD V2.0 PREDICTION FOR PLATELET ENDOTHELIAL CELL ADHESION MOLECULE (Q3SWT0)	MOL_ID: 1; ORGANISM_SCIENTIFIC: RATTUS NORVEGICUS; ORGANISM_TAXID: 10116	01-JUL-21	12-OCT-21	1-17	74324.1	0.737	3.76	0.038	3.03	0.0039	5.69	0.0074	21.2	0.33	71.3	26.2	12.56	5.09	5.9	40.5	85.31	1.25308
Q4D6A0-F1	AF-Q4D6A0-F1-model_v1	ALPHAFOLD V2.0 PREDICTION FOR MUCIN-ASSOCIATED SURFACE PROTEIN (MASP), PUTATIVE (Q4D6A0)	MOL_ID: 1; ORGANISM_SCIENTIFIC: TRYPANOSOMA CRUZI (STRAIN CL BRENER); ORGANISM_TAXID: 353153	01-JUL-21	12-OCT-21	n/a	4072.5	0.749	12.9	0.13	0.545	0.00069	1.66	0.0021	9.67	0.15	20.8	8.15	2.14	1.91	61.9	0	70.61	1.25301
Q9LSB9-F1	AF-Q9LSB9-F1-model_v1	ALPHAFOLD V2.0 PREDICTION FOR PX DOMAIN-CONTAINING PROTEIN EREX (Q9LSB9)	MOL_ID: 1; ORGANISM_SCIENTIFIC: ARABIDOPSIS THALIANA; ORGANISM_TAXID: 3702	01-JUL-21	12-OCT-21	n/a	85605.3	0.728	3.08	0.031	2.96	0.0039	6.96	0.0092	34	0.54	87.2	35.88	10.55	9.27	47.9	3.5	67.56	1.25287
O60330-F1	AF-O60330-F1-model_v1	ALPHAFOLD V2.0 PREDICTION FOR PROTOCADHERIN GAMMA-A12 (O60330)	MOL_ID: 1; ORGANISM_SCIENTIFIC: HOMO SAPIENS; ORGANISM_TAXID: 9606	01-JUL-21	12-OCT-21	1-29	97709.3	0.731	3.22	0.032	3.49	0.0043	6.65	0.0082	23.5	0.37	83.3	29.62	11.91	9.42	8.1	25.4	76.07	1.25263
A0A0G2K9U4-F1	AF-A0A0G2K9U4-F1-model_v1	ALPHAFOLD V2.0 PREDICTION FOR UNCHARACTERIZED PROTEIN (A0A0G2K9U4)	MOL_ID: 1; ORGANISM_SCIENTIFIC: RATTUS NORVEGICUS; ORGANISM_TAXID: 10116	01-JUL-21	12-OCT-21	n/a	34070.4	0.739	5.3	0.054	1.94	0.0028	4.04	0.0058	19.2	0.31	50.6	23.7	5.73	3.95	25.5	30.5	90.61	1.25248
A0A0B4KFU4-F1	AF-A0A0B4KFU4-F1-model_v1	ALPHAFOLD V2.0 PREDICTION FOR UNCHARACTERIZED PROTEIN (A0A0B4KFU4)	MOL_ID: 1; ORGANISM_SCIENTIFIC: DROSOPHILA MELANOGASTER; ORGANISM_TAXID: 7227	01-JUL-21	12-OCT-21	1-15	6125.5	0.754	10.4	0.1	0.645	0.0008	2.06	0.0026	11.6	0.18	25.8	8.77	2.91	3.07	36.4	0	54.19	1.25243
A0A0P0W6Z2-F1	AF-A0A0P0W6Z2-F1-model_v1	ALPHAFOLD V2.0 PREDICTION FOR OS04G0169666 PROTEIN (A0A0P0W6Z2)	MOL_ID: 1; ORGANISM_SCIENTIFIC: ORYZA SATIVA SUBSP. JAPONICA; ORGANISM_TAXID: 39947	01-JUL-21	12-OCT-21	n/a	9896.3	0.695	6.84	0.069	0.85	0.0011	3.13	0.004	25.3	0.4	39.2	14.39	5.53	3.89	0	0	48.52	1.2524
A3FPJ0-F1	AF-A3FPJ0-F1-model_v1	ALPHAFOLD V2.0 PREDICTION FOR UNCHARACTERIZED PROTEIN (A3FPJ0)	MOL_ID: 1; ORGANISM_SCIENTIFIC: CAENORHABDITIS ELEGANS; ORGANISM_TAXID: 6239	01-JUL-21	12-OCT-21	n/a	5703.4	0.712	10.2	0.1	0.69	0.00087	2.1	0.0026	13.6	0.21	26.3	9.68	3.16	2.62	43.8	0	71.8	1.25238
P76261-F1	AF-P76261-F1-model_v1	ALPHAFOLD V2.0 PREDICTION FOR PROBABLE CYCLIC DI-GMP PHOSPHODIESTERASE PDED (P76261)	MOL_ID: 1; ORGANISM_SCIENTIFIC: ESCHERICHIA COLI (STRAIN K12); ORGANISM_TAXID: 83333	01-JUL-21	12-OCT-21	n/a	59728.5	0.748	5.01	0.05	3.11	0.0039	4.28	0.0053	10.9	0.17	53.6	18.73	8.32	6.03	44.4	17.1	88.38	1.25234
Q8IWL2-F1	AF-Q8IWL2-F1-model_v1	ALPHAFOLD V2.0 PREDICTION FOR PULMONARY SURFACTANT-ASSOCIATED PROTEIN A1 (Q8IWL2)	MOL_ID: 1; ORGANISM_SCIENTIFIC: HOMO SAPIENS; ORGANISM_TAXID: 9606	01-JUL-21	12-OCT-21	1-20	24160	0.718	6.21	0.063	1.74	0.0023	3.45	0.0045	14.8	0.23	43.2	16.84	4.93	4.6	19.4	9.2	86.27	1.25217
P58550-F1	AF-P58550-F1-model_v1	ALPHAFOLD V2.0 PREDICTION FOR PUTATIVE FXYD DOMAIN-CONTAINING ION TRANSPORT REGULATOR 8 (P58550)	MOL_ID: 1; ORGANISM_SCIENTIFIC: HOMO SAPIENS; ORGANISM_TAXID: 9606	01-JUL-21	12-OCT-21	1-18	8606.7	0.734	8.71	0.088	0.823	0.001	2.46	0.003	14.2	0.22	30.8	9.98	5.13	2.76	57.3	0	70.65	1.25203
A0A0P0WSY9-F1	AF-A0A0P0WSY9-F1-model_v1	ALPHAFOLD V2.0 PREDICTION FOR OS06G0170833 PROTEIN (A0A0P0WSY9)	MOL_ID: 1; ORGANISM_SCIENTIFIC: ORYZA SATIVA SUBSP. JAPONICA; ORGANISM_TAXID: 39947	01-JUL-21	12-OCT-21	n/a	7810.6	0.714	8.44	0.085	0.777	0.00099	2.54	0.0032	17.4	0.28	31.8	12.15	4.83	2.79	21.7	0	61.98	1.25197
Q92637-F1	AF-Q92637-F1-model_v1	ALPHAFOLD V2.0 PREDICTION FOR HIGH AFFINITY IMMUNOGLOBULIN GAMMA FC RECEPTOR IB (Q92637)	MOL_ID: 1; ORGANISM_SCIENTIFIC: HOMO SAPIENS; ORGANISM_TAXID: 9606	01-JUL-21	12-OCT-21	1-15	30468.3	0.737	5.56	0.056	1.84	0.0022	3.85	0.0047	15.7	0.25	48.2	15.67	9.13	5.29	31.4	23.5	84.22	1.25195
Q9VTQ3-F1	AF-Q9VTQ3-F1-model_v1	ALPHAFOLD V2.0 PREDICTION FOR COILED-COIL DOMAIN CONTAINING PROTEIN 151 (Q9VTQ3)	MOL_ID: 1; ORGANISM_SCIENTIFIC: DROSOPHILA MELANOGASTER; ORGANISM_TAXID: 7227	01-JUL-21	12-OCT-21	n/a	70150.7	0.731	3.33	0.034	2.59	0.0033	6.43	0.0082	31	0.49	80.5	27.93	11.97	8.88	65.7	1	74.27	1.25194
F1M154-F1	AF-F1M154-F1-model_v1	ALPHAFOLD V2.0 PREDICTION FOR COILED-COIL DOMAIN-CONTAINING 154 (F1M154)	MOL_ID: 1; ORGANISM_SCIENTIFIC: RATTUS NORVEGICUS; ORGANISM_TAXID: 10116	01-JUL-21	12-OCT-21	n/a	76288.5	0.737	3.27	0.033	2.71	0.0035	6.55	0.0084	30.9	0.49	82	32.75	11.11	5.79	80.2	0	76.29	1.25191
Q9D871-F1	AF-Q9D871-F1-model_v1	ALPHAFOLD V2.0 PREDICTION FOR CARCINOEMBRYONIC ANTIGEN-RELATED CELL ADHESION MOLECULE 18 (Q9D871)	MOL_ID: 1; ORGANISM_SCIENTIFIC: MUS MUSCULUS; ORGANISM_TAXID: 10090	01-JUL-21	12-OCT-21	1-30	38902.1	0.733	5.13	0.052	2.2	0.0028	4.17	0.0054	16.5	0.26	52.2	18.58	10.74	4.62	10.7	31.3	90.3	1.2518
Q56YQ1-F1	AF-Q56YQ1-F1-model_v1	ALPHAFOLD V2.0 PREDICTION FOR TRANSMEMBRANE PROTEIN (Q56YQ1)	MOL_ID: 1; ORGANISM_SCIENTIFIC: ARABIDOPSIS THALIANA; ORGANISM_TAXID: 3702	01-JUL-21	12-OCT-21	1-19	5845.7	0.729	10.1	0.1	0.663	0.00081	2.11	0.0026	13.2	0.21	26.4	8.95	4.75	2.09	47.1	0	59.62	1.25118
B9FWB9-F1	AF-B9FWB9-F1-model_v1	ALPHAFOLD V2.0 PREDICTION FOR OS07G0238600 PROTEIN (B9FWB9)	MOL_ID: 1; ORGANISM_SCIENTIFIC: ORYZA SATIVA SUBSP. JAPONICA; ORGANISM_TAXID: 39947	01-JUL-21	12-OCT-21	n/a	8450.5	0.742	9.27	0.093	0.833	0.001	2.31	0.0028	12	0.19	28.9	9.81	4.16	2.7	39	0	61.09	1.25108
Q23457-F1	AF-Q23457-F1-model_v1	ALPHAFOLD V2.0 PREDICTION FOR RING-BOX PROTEIN 1 (Q23457)	MOL_ID: 1; ORGANISM_SCIENTIFIC: CAENORHABDITIS ELEGANS; ORGANISM_TAXID: 6239	01-JUL-21	12-OCT-21	n/a	12761.3	0.722	7.68	0.078	1.12	0.0015	2.79	0.0037	15	0.24	34.9	13.02	4.9	3.12	13.8	7.3	77.69	1.2509
Q4CUE9-F1	AF-Q4CUE9-F1-model_v1	ALPHAFOLD V2.0 PREDICTION FOR UNCHARACTERIZED PROTEIN (Q4CUE9)	MOL_ID: 1; ORGANISM_SCIENTIFIC: TRYPANOSOMA CRUZI (STRAIN CL BRENER); ORGANISM_TAXID: 353153	01-JUL-21	12-OCT-21	n/a	14039.3	0.728	7.46	0.075	1.17	0.0014	2.87	0.0034	13.3	0.21	35.9	11.07	5.25	4	50	0	83.31	1.25087
A0A0P0WXA5-F1	AF-A0A0P0WXA5-F1-model_v1	ALPHAFOLD V2.0 PREDICTION FOR OS06G0491566 PROTEIN (A0A0P0WXA5)	MOL_ID: 1; ORGANISM_SCIENTIFIC: ORYZA SATIVA SUBSP. JAPONICA; ORGANISM_TAXID: 39947	01-JUL-21	12-OCT-21	n/a	10679.9	0.728	7.47	0.075	0.894	0.0011	2.87	0.0036	18.5	0.29	35.9	13.26	4.66	4.43	49	0	63.64	1.25087
A6NEE1-F1	AF-A6NEE1-F1-model_v1	ALPHAFOLD V2.0 PREDICTION FOR PLECKSTRIN HOMOLOGY DOMAIN-CONTAINING FAMILY D MEMBER 1 (A6NEE1)	MOL_ID: 1; ORGANISM_SCIENTIFIC: HOMO SAPIENS; ORGANISM_TAXID: 9606	01-JUL-21	12-OCT-21	n/a	59208.6	0.732	4.04	0.041	2.64	0.0033	5.31	0.0067	20	0.31	66.4	23.99	8.43	9.27	69.1	6.5	81.8	1.25047
A0A1D8PUA9-F1	AF-A0A1D8PUA9-F1-model_v1	ALPHAFOLD V2.0 PREDICTION FOR VPS52P (A0A1D8PUA9)	MOL_ID: 1; ORGANISM_SCIENTIFIC: CANDIDA ALBICANS (STRAIN SC5314 / ATCC MYA-2876); ORGANISM_TAXID: 237561	01-JUL-21	12-OCT-21	n/a	60857.8	0.745	4.54	0.046	2.91	0.0037	4.72	0.006	15.2	0.24	59	22.88	5.88	5.57	72.6	0	84.66	1.25
Q4CVC9-F1	AF-Q4CVC9-F1-model_v1	ALPHAFOLD V2.0 PREDICTION FOR UNCHARACTERIZED PROTEIN (Q4CVC9)	MOL_ID: 1; ORGANISM_SCIENTIFIC: TRYPANOSOMA CRUZI (STRAIN CL BRENER); ORGANISM_TAXID: 353153	01-JUL-21	12-OCT-21	n/a	17570.4	0.735	6.46	0.065	1.24	0.0015	3.32	0.004	16.7	0.26	41.5	12.67	7.82	4.34	63.2	0	71.24	1.25
O69726-F1	AF-O69726-F1-model_v1	ALPHAFOLD V2.0 PREDICTION FOR UNCHARACTERIZED MEMBRANE PROTEIN RV3760 (O69726)	MOL_ID: 1; ORGANISM_SCIENTIFIC: MYCOBACTERIUM TUBERCULOSIS (STRAIN ATCC 25618 / H37RV); ORGANISM_TAXID: 83332	01-JUL-21	12-OCT-21	n/a	12205.5	0.76	7.33	0.074	0.886	0.0012	2.92	0.0038	17.6	0.28	36.5	14.1	5.1	4.06	52.6	8.6	81.77	1.25
Q9Y3F1-F1	AF-Q9Y3F1-F1-model_v1	ALPHAFOLD V2.0 PREDICTION FOR PUTATIVE TAP2-ASSOCIATED 6.5 KDA POLYPEPTIDE (Q9Y3F1)	MOL_ID: 1; ORGANISM_SCIENTIFIC: HOMO SAPIENS; ORGANISM_TAXID: 9606	01-JUL-21	12-OCT-21	n/a	6533.3	0.75	10.7	0.11	0.721	0.00088	2	0.0025	10	0.16	25	8.62	3.32	2.02	76.4	0	63.77	1.25
O74837-F1	AF-O74837-F1-model_v1	ALPHAFOLD V2.0 PREDICTION FOR PLASMA MEMBRANE PROTEOLIPID 31 (O74837)	MOL_ID: 1; ORGANISM_SCIENTIFIC: SCHIZOSACCHAROMYCES POMBE (STRAIN 972 / ATCC 24843); ORGANISM_TAXID: 284812	01-JUL-21	12-OCT-21	n/a	11964.5	0.747	7.44	0.075	0.929	0.0012	2.88	0.0036	16.1	0.25	36	11.68	6.45	5.22	46.3	0	64.94	1.25
A0A0P0YA18-F1	AF-A0A0P0YA18-F1-model_v1	ALPHAFOLD V2.0 PREDICTION FOR OS12G0467500 PROTEIN (A0A0P0YA18)	MOL_ID: 1; ORGANISM_SCIENTIFIC: ORYZA SATIVA SUBSP. JAPONICA; ORGANISM_TAXID: 39947	01-JUL-21	12-OCT-21	n/a	9065.5	0.719	7.15	0.072	0.75	0.00087	3	0.0035	22.9	0.36	37.5	11.28	8.47	3.46	9.2	0	61.21	1.25
A0A0G2K4W1-F1	AF-A0A0G2K4W1-F1-model_v1	ALPHAFOLD V2.0 PREDICTION FOR KERATIN-ASSOCIATED PROTEIN 20-2-LIKE (A0A0G2K4W1)	MOL_ID: 1; ORGANISM_SCIENTIFIC: RATTUS NORVEGICUS; ORGANISM_TAXID: 10116	01-JUL-21	12-OCT-21	n/a	5568.6	0.699	9.91	0.1	0.685	0.00084	2.16	0.0026	14.6	0.23	27	9.89	4.16	2.88	4	0	51.27	1.25
Q2QM11-F1	AF-Q2QM11-F1-model_v1	ALPHAFOLD V2.0 PREDICTION FOR EXPRESSED PROTEIN (Q2QM11)	MOL_ID: 1; ORGANISM_SCIENTIFIC: ORYZA SATIVA SUBSP. JAPONICA; ORGANISM_TAXID: 39947	01-JUL-21	12-OCT-21	n/a	15613.6	0.72	5.89	0.059	1.06	0.0013	3.64	0.0045	25.4	0.4	45.5	15.86	6.84	5.74	34.3	0	62.19	1.25
D4A713-F1	AF-D4A713-F1-model_v1	ALPHAFOLD V2.0 PREDICTION FOR CYSTEINE-RICH AND TRANSMEMBRANE DOMAIN-CONTAINING PROTEIN 1 (D4A713)	MOL_ID: 1; ORGANISM_SCIENTIFIC: RATTUS NORVEGICUS; ORGANISM_TAXID: 10116	01-JUL-21	12-OCT-21	n/a	11165.9	0.721	7.67	0.077	0.984	0.0012	2.8	0.0035	15.5	0.24	35	12.71	4.99	3.47	36.3	0	65.32	1.25
O60858-F1	AF-O60858-F1-model_v1	ALPHAFOLD V2.0 PREDICTION FOR E3 UBIQUITIN-PROTEIN LIGASE TRIM13 (O60858)	MOL_ID: 1; ORGANISM_SCIENTIFIC: HOMO SAPIENS; ORGANISM_TAXID: 9606	01-JUL-21	12-OCT-21	n/a	46990.2	0.746	4.38	0.044	2.16	0.0027	4.89	0.0061	19.2	0.3	61.1	16.99	12.72	5.49	61.3	2.7	79.78	1.24949
H3BRN8-F1	AF-H3BRN8-F1-model_v1	ALPHAFOLD V2.0 PREDICTION FOR UNCHARACTERIZED PROTEIN C15ORF65 (H3BRN8)	MOL_ID: 1; ORGANISM_SCIENTIFIC: HOMO SAPIENS; ORGANISM_TAXID: 9606	01-JUL-21	12-OCT-21	n/a	13766.1	0.72	7.03	0.071	1.12	0.0014	3.05	0.0037	16.4	0.26	38.1	13.14	5.15	3.17	14.2	0	75.33	1.24918
B0I1T2-F1	AF-B0I1T2-F1-model_v1	ALPHAFOLD V2.0 PREDICTION FOR UNCONVENTIONAL MYOSIN-IG (B0I1T2)	MOL_ID: 1; ORGANISM_SCIENTIFIC: HOMO SAPIENS; ORGANISM_TAXID: 9606	01-JUL-21	12-OCT-21	n/a	116485	0.735	4.02	0.04	5.11	0.006	5.34	0.0063	10.5	0.16	66.7	22.41	9.04	7.48	44.1	13.8	87.89	1.24906
Q9C075-F1	AF-Q9C075-F1-model_v1	ALPHAFOLD V2.0 PREDICTION FOR KERATIN, TYPE I CYTOSKELETAL 23 (Q9C075)	MOL_ID: 1; ORGANISM_SCIENTIFIC: HOMO SAPIENS; ORGANISM_TAXID: 9606	01-JUL-21	12-OCT-21	n/a	48134.3	0.728	4.08	0.041	2.2	0.0028	5.26	0.0066	24.6	0.39	65.7	23.36	9.57	6.53	64.8	4.5	76.87	1.24905
K7MKT7-F1	AF-K7MKT7-F1-model_v1	ALPHAFOLD V2.0 PREDICTION FOR UNCHARACTERIZED PROTEIN (K7MKT7)	MOL_ID: 1; ORGANISM_SCIENTIFIC: GLYCINE MAX; ORGANISM_TAXID: 3847	01-JUL-21	12-OCT-21	n/a	8276.5	0.729	8.47	0.085	0.783	0.00096	2.53	0.0031	15.9	0.25	31.6	9.88	5.88	3.3	45.8	0	74.02	1.24901
A0A1B0GW15-F1	AF-A0A1B0GW15-F1-model_v1	ALPHAFOLD V2.0 PREDICTION FOR UNCHARACTERIZED PROTEIN (A0A1B0GW15)	MOL_ID: 1; ORGANISM_SCIENTIFIC: HOMO SAPIENS; ORGANISM_TAXID: 9606	01-JUL-21	12-OCT-21	n/a	9061.3	0.747	9.06	0.091	0.856	0.0011	2.37	0.003	12.1	0.19	29.6	10.28	4.23	2.23	77.6	0	80.98	1.24895
Q6PB30-F1	AF-Q6PB30-F1-model_v1	ALPHAFOLD V2.0 PREDICTION FOR PUTATIVE CHONDROSARCOMA-ASSOCIATED GENE 1 PROTEIN (Q6PB30)	MOL_ID: 1; ORGANISM_SCIENTIFIC: HOMO SAPIENS; ORGANISM_TAXID: 9606	01-JUL-21	12-OCT-21	1-19	6756	0.721	9.04	0.091	0.702	0.00082	2.37	0.0028	15.2	0.24	29.6	9.08	5.14	3.09	10.3	0	66.34	1.24895
P58511-F1	AF-P58511-F1-model_v1	ALPHAFOLD V2.0 PREDICTION FOR SMALL INTEGRAL MEMBRANE PROTEIN 11A (P58511)	MOL_ID: 1; ORGANISM_SCIENTIFIC: HOMO SAPIENS; ORGANISM_TAXID: 9606	01-JUL-21	12-OCT-21	n/a	6894.6	0.761	10.2	0.1	0.696	0.00084	2.09	0.0025	11	0.17	26.1	9.41	2.28	2.27	94.7	0	82.55	1.2488
Q559R4-F1	AF-Q559R4-F1-model_v1	ALPHAFOLD V2.0 PREDICTION FOR UNCHARACTERIZED PROTEIN (Q559R4)	MOL_ID: 1; ORGANISM_SCIENTIFIC: DICTYOSTELIUM DISCOIDEUM; ORGANISM_TAXID: 44689	01-JUL-21	12-OCT-21	n/a	22733.4	0.758	5.28	0.053	1.2	0.0015	4.06	0.0052	23.7	0.37	50.7	17.53	10.52	4.71	39.8	0	59.21	1.24877
O00233-F1	AF-O00233-F1-model_v1	ALPHAFOLD V2.0 PREDICTION FOR 26S PROTEASOME NON-ATPASE REGULATORY SUBUNIT 9 (O00233)	MOL_ID: 1; ORGANISM_SCIENTIFIC: HOMO SAPIENS; ORGANISM_TAXID: 9606	01-JUL-21	12-OCT-21	n/a	24685.5	0.728	6.33	0.064	1.75	0.0021	3.38	0.004	12.5	0.19	42.2	13.16	7	3.84	43.7	11.3	83.36	1.24852
Q84JI2-F1	AF-Q84JI2-F1-model_v1	ALPHAFOLD V2.0 PREDICTION FOR UNCHARACTERIZED PROTEIN AT4G23770 (Q84JI2)	MOL_ID: 1; ORGANISM_SCIENTIFIC: ARABIDOPSIS THALIANA; ORGANISM_TAXID: 3702	01-JUL-21	12-OCT-21	n/a	16133.8	0.734	6.42	0.065	1.14	0.0013	3.34	0.0039	18.3	0.29	41.7	13.94	5.91	4.39	65.7	0	77.29	1.2485
A0A0P0V4G5-F1	AF-A0A0P0V4G5-F1-model_v1	ALPHAFOLD V2.0 PREDICTION FOR OS01G0581500 PROTEIN (A0A0P0V4G5)	MOL_ID: 1; ORGANISM_SCIENTIFIC: ORYZA SATIVA SUBSP. JAPONICA; ORGANISM_TAXID: 39947	01-JUL-21	12-OCT-21	n/a	11917.8	0.714	6.5	0.065	0.912	0.0012	3.3	0.0042	24.9	0.39	41.2	14.95	5.58	4.45	12.6	0	57.67	1.24848
A0A1D8PGL1-F1	AF-A0A1D8PGL1-F1-model_v1	ALPHAFOLD V2.0 PREDICTION FOR ENDOPLASMIC RETICULUM TRANSMEMBRANE PROTEIN (A0A1D8PGL1)	MOL_ID: 1; ORGANISM_SCIENTIFIC: CANDIDA ALBICANS (STRAIN SC5314 / ATCC MYA-2876); ORGANISM_TAXID: 237561	01-JUL-21	12-OCT-21	n/a	21433.2	0.75	6.74	0.068	1.49	0.0019	3.18	0.0041	13	0.21	39.7	15.75	4.48	3.42	89.4	0	78.9	1.24843
Q20691-F1	AF-Q20691-F1-model_v1	ALPHAFOLD V2.0 PREDICTION FOR UNCHARACTERIZED PROTEIN (Q20691)	MOL_ID: 1; ORGANISM_SCIENTIFIC: CAENORHABDITIS ELEGANS; ORGANISM_TAXID: 6239	01-JUL-21	12-OCT-21	n/a	9375.1	0.682	7.39	0.074	0.907	0.0011	2.9	0.0036	20	0.31	36.2	12.28	7.03	3.93	0	0	54.54	1.24828
A0A0G2KB49-F1	AF-A0A0G2KB49-F1-model_v1	ALPHAFOLD V2.0 PREDICTION FOR UNCHARACTERIZED PROTEIN (A0A0G2KB49)	MOL_ID: 1; ORGANISM_SCIENTIFIC: RATTUS NORVEGICUS; ORGANISM_TAXID: 10116	01-JUL-21	12-OCT-21	n/a	8828.6	0.728	8.86	0.089	0.877	0.0011	2.42	0.0029	12.9	0.2	30.2	10.71	3.81	2.54	48	0	67.94	1.24793
Q9C634-F1	AF-Q9C634-F1-model_v1	ALPHAFOLD V2.0 PREDICTION FOR TRANSMEMBRANE PROTEIN (Q9C634)	MOL_ID: 1; ORGANISM_SCIENTIFIC: ARABIDOPSIS THALIANA; ORGANISM_TAXID: 3702	01-JUL-21	12-OCT-21	n/a	9435.4	0.769	9.17	0.092	0.825	0.001	2.34	0.0029	11.2	0.18	29.2	10.73	3.11	2.14	88.6	0	61.23	1.24786
Q9Y5G5-F1	AF-Q9Y5G5-F1-model_v1	ALPHAFOLD V2.0 PREDICTION FOR PROTOCADHERIN GAMMA-A8 (Q9Y5G5)	MOL_ID: 1; ORGANISM_SCIENTIFIC: HOMO SAPIENS; ORGANISM_TAXID: 9606	01-JUL-21	12-OCT-21	1-29	98302.2	0.733	3.2	0.032	3.46	0.0043	6.7	0.0084	23.9	0.38	83.6	29.26	14.16	10.03	8.8	25.2	74.43	1.24776
[truncated: 39,890 more rows]
