# Supplementary material for: A database of calculated solution parameters for the AlphaFold predicted protein structures
Source: Sci Rep. 2022 May 5;12:7349. doi: 10.1038/s41598-022-10607-z (PMC9072687; doi:10.1038/s41598-022-10607-z)
Supplement: Supplementary file 5 — Supplementary Information 3. [file 41598_2022_10607_MOESM5_ESM.xlsx]

## Sheet: O88338 DMD
Model name	Total beads in model	Molecular mass [Da]	Partial specific volume [cm^3/g]	Sedimentation coefficient s [S]	Translational diffusion coefficient D [cm/sec^2]	Stokes radius [nm]	Intrinsic viscosity [cm^3/g]	Intrisic viscosity s.d.	Radius of gyration [A] (from PDB atomic structure)
O88338-all_1_MC1000-A20R50pH7-so_ovlp	1565	87397.6	0.735	3.48032	3.64482e-07	5.87969	20.8197	0.328999	86.41
O88338-all_2_MC1000-A20R50pH7-so_ovlp	1565	87397.6	0.735	3.46002	3.62355e-07	5.91419	21.3307	0.336938	86.94
O88338-all_3_MC1000-A20R50pH7-so_ovlp	1565	87397.6	0.735	3.44496	3.60778e-07	5.94005	21.3323	0.336619	86.86
O88338-all_4_MC1000-A20R50pH7-so_ovlp	1565	87397.6	0.735	3.4352	3.59756e-07	5.95692	21.7588	0.343106	87.53
O88338-all_5_MC1000-A20R50pH7-so_ovlp	1565	87397.6	0.735	3.41079	3.572e-07	5.99956	21.9434	0.346282	87.71
O88338-all_6_MC1000-A20R50pH7-so_ovlp	1565	87397.6	0.735	3.39422	3.55464e-07	6.02884	22.194	0.350594	87.76
O88338-all_7_MC1000-A20R50pH7-so_ovlp	1565	87397.6	0.735	3.39481	3.55527e-07	6.02779	22.2733	0.351228	87.98
O88338-all_8_MC1000-A20R50pH7-so_ovlp	1565	87397.6	0.735	3.37172	3.53108e-07	6.06908	22.6514	0.356984	88.19
O88338-all_9_MC1000-A20R50pH7-so_ovlp	1565	87397.6	0.735	3.37002	3.5293e-07	6.07214	22.4415	0.354083	88.17
O88338-all_10_MC1000-A20R50pH7-so_ovlp	1565	87397.6	0.735	3.37056	3.52987e-07	6.07116	22.3779	0.353139	88.16
O88338-all_11_MC1000-A20R50pH7-so_ovlp	1565	87397.6	0.735	3.34951	3.50782e-07	6.10932	22.9702	0.362973	88.93
O88338-all_12_MC1000-A20R50pH7-so_ovlp	1565	87397.6	0.735	3.33888	3.49669e-07	6.12876	23.2712	0.366689	89.15
O88338-all_13_MC1000-A20R50pH7-so_ovlp	1565	87397.6	0.735	3.34284	3.50084e-07	6.12151	23.289	0.367177	89.29
O88338-all_14_MC1000-A20R50pH7-so_ovlp	1565	87397.6	0.735	3.33038	3.48779e-07	6.1444	23.7899	0.37569	89.6
O88338-all_15_MC1000-A20R50pH7-so_ovlp	1565	87397.6	0.735	3.31988	3.47679e-07	6.16384	23.8287	0.376164	89.79
O88338-all_16_MC1000-A20R50pH7-so_ovlp	1565	87397.6	0.735	3.33751	3.49525e-07	6.13129	23.583	0.372424	89.55
O88338-all_17_MC1000-A20R50pH7-so_ovlp	1565	87397.6	0.735	3.34052	3.49841e-07	6.12575	23.5876	0.372962	89.76
O88338-all_18_MC1000-A20R50pH7-so_ovlp	1565	87397.6	0.735	3.33066	3.48808e-07	6.1439	23.7979	0.376712	89.93
O88338-all_19_MC1000-A20R50pH7-so_ovlp	1565	87397.6	0.735	3.33312	3.49066e-07	6.13936	23.3803	0.369453	89.82
O88338-all_20_MC1000-A20R50pH7-so_ovlp	1565	87397.6	0.735	3.3464	3.50457e-07	6.11499	23.5994	0.372391	89.38
O88338-all_21_MC1000-A20R50pH7-so_ovlp	1565	87397.6	0.735	3.35757	3.51626e-07	6.09465	23.1546	0.365417	89.05
O88338-all_22_MC1000-A20R50pH7-so_ovlp	1565	87397.6	0.735	3.36982	3.52909e-07	6.0725	23.0047	0.363254	88.89
O88338-all_23_MC1000-A20R50pH7-so_ovlp	1565	87397.6	0.735	3.41067	3.57187e-07	5.99976	22.3744	0.352833	88.55
O88338-all_24_MC1000-A20R50pH7-so_ovlp	1565	87397.6	0.735	3.36685	3.52598e-07	6.07785	22.8446	0.360943	89.28
O88338-all_25_MC1000-A20R50pH7-so_ovlp	1565	87397.6	0.735	3.36671	3.52584e-07	6.0781	22.7795	0.359332	89.04
O88338-all_26_MC1000-A20R50pH7-so_ovlp	1565	87397.6	0.735	3.37914	3.53886e-07	6.05574	23.021	0.363503	89.4
O88338-all_27_MC1000-A20R50pH7-so_ovlp	1565	87397.6	0.735	3.36084	3.51969e-07	6.08872	23.2728	0.367796	89.75
O88338-all_28_MC1000-A20R50pH7-so_ovlp	1565	87397.6	0.735	3.37636	3.53594e-07	6.06074	23.204	0.366449	89.33
O88338-all_29_MC1000-A20R50pH7-so_ovlp	1565	87397.6	0.735	3.37328	3.53272e-07	6.06626	23.2325	0.366844	89.85
O88338-all_30_MC1000-A20R50pH7-so_ovlp	1565	87397.6	0.735	3.371	3.53033e-07	6.07037	23.0574	0.364219	90.03
O88338-all_31_MC1000-A20R50pH7-so_ovlp	1565	87397.6	0.735	3.36335	3.52232e-07	6.08417	23.2716	0.367378	89.84
O88338-all_32_MC1000-A20R50pH7-so_ovlp	1565	87397.6	0.735	3.36332	3.52229e-07	6.08422	23.3376	0.368208	90.02
O88338-all_33_MC1000-A20R50pH7-so_ovlp	1565	87397.6	0.735	3.37235	3.53174e-07	6.06794	23.0345	0.363879	90.27
O88338-all_34_MC1000-A20R50pH7-so_ovlp	1565	87397.6	0.735	3.40056	3.56128e-07	6.0176	22.6608	0.357902	90.01
O88338-all_35_MC1000-A20R50pH7-so_ovlp	1565	87397.6	0.735	3.3837	3.54363e-07	6.04759	22.9786	0.363159	90.26
O88338-all_36_MC1000-A20R50pH7-so_ovlp	1565	87397.6	0.735	3.36783	3.52701e-07	6.07607	23.2927	0.36732	90.58
O88338-all_37_MC1000-A20R50pH7-so_ovlp	1565	87397.6	0.735	3.37622	3.5358e-07	6.06098	22.8876	0.361444	90.11
O88338-all_38_MC1000-A20R50pH7-so_ovlp	1565	87397.6	0.735	3.36097	3.51982e-07	6.08849	23.114	0.364952	90.3
O88338-all_39_MC1000-A20R50pH7-so_ovlp	1565	87397.6	0.735	3.36665	3.52577e-07	6.07822	23.3973	0.369124	90.44
O88338-all_40_MC1000-A20R50pH7-so_ovlp	1565	87397.6	0.735	3.37524	3.53477e-07	6.06274	22.9389	0.361966	90.08
O88338-all_41_MC1000-A20R50pH7-so_ovlp	1565	87397.6	0.735	3.39682	3.55737e-07	6.02422	22.5672	0.35633	89.2
O88338-all_42_MC1000-A20R50pH7-so_ovlp	1565	87397.6	0.735	3.40353	3.5644e-07	6.01235	22.3606	0.352861	88.59
O88338-all_43_MC1000-A20R50pH7-so_ovlp	1565	87397.6	0.735	3.42491	3.58679e-07	5.97482	21.8002	0.343837	87.72
O88338-all_44_MC1000-A20R50pH7-so_ovlp	1565	87397.6	0.735	3.42872	3.59078e-07	5.96818	21.8869	0.345708	88.13
O88338-all_45_MC1000-A20R50pH7-so_ovlp	1565	87397.6	0.735	3.42349	3.5853e-07	5.97729	22.0535	0.347751	88.13
O88338-all_46_MC1000-A20R50pH7-so_ovlp	1565	87397.6	0.735	3.41548	3.57691e-07	5.99132	22.3157	0.351977	88.37
O88338-all_47_MC1000-A20R50pH7-so_ovlp	1565	87397.6	0.735	3.42652	3.58847e-07	5.97202	22.1728	0.349268	88.53
O88338-all_48_MC1000-A20R50pH7-so_ovlp	1565	87397.6	0.735	3.43037	3.5925e-07	5.96532	22.0069	0.347086	88.99
O88338-all_49_MC1000-A20R50pH7-so_ovlp	1565	87397.6	0.735	3.40796	3.56904e-07	6.00454	22.1452	0.350621	88.72
O88338-all_50_MC1000-A20R50pH7-so_ovlp	1565	87397.6	0.735	3.42655	3.5885e-07	5.97196	22.0471	0.34798	88.79
O88338-all_51_MC1000-A20R50pH7-so_ovlp	1565	87397.6	0.735	3.41491	3.57631e-07	5.99232	22.3026	0.35229	89.02
O88338-all_52_MC1000-A20R50pH7-so_ovlp	1565	87397.6	0.735	3.4374	3.59987e-07	5.95311	22.1294	0.34913	89.21
O88338-all_53_MC1000-A20R50pH7-so_ovlp	1565	87397.6	0.735	3.41597	3.57743e-07	5.99045	22.51	0.354928	89.22
O88338-all_54_MC1000-A20R50pH7-so_ovlp	1565	87397.6	0.735	3.42788	3.5899e-07	5.96964	22.1734	0.350271	88.86
O88338-all_55_MC1000-A20R50pH7-so_ovlp	1565	87397.6	0.735	3.42039	3.58206e-07	5.98271	22.4482	0.353961	88.88
O88338-all_56_MC1000-A20R50pH7-so_ovlp	1565	87397.6	0.735	3.42997	3.59208e-07	5.96601	22.2255	0.350252	88.25
O88338-all_57_MC1000-A20R50pH7-so_ovlp	1565	87397.6	0.735	3.43851	3.60103e-07	5.95118	21.8545	0.344957	87.64
O88338-all_58_MC1000-A20R50pH7-so_ovlp	1565	87397.6	0.735	3.40126	3.56202e-07	6.01637	22.269	0.351198	87.65
O88338-all_59_MC1000-A20R50pH7-so_ovlp	1565	87397.6	0.735	3.40738	3.56842e-07	6.00556	22.2978	0.351956	87.84
O88338-all_60_MC1000-A20R50pH7-so_ovlp	1565	87397.6	0.735	3.38417	3.54412e-07	6.04675	22.6829	0.357957	88.49
O88338-all_61_MC1000-A20R50pH7-so_ovlp	1565	87397.6	0.735	3.36607	3.52517e-07	6.07925	23.0625	0.363979	88.52
O88338-all_62_MC1000-A20R50pH7-so_ovlp	1565	87397.6	0.735	3.38612	3.54616e-07	6.04326	22.4323	0.353987	88.35
O88338-all_63_MC1000-A20R50pH7-so_ovlp	1565	87397.6	0.735	3.41317	3.5745e-07	5.99536	22.3432	0.352824	88.15
O88338-all_64_MC1000-A20R50pH7-so_ovlp	1565	87397.6	0.735	3.40096	3.56171e-07	6.01689	22.2206	0.350855	88.32
O88338-all_65_MC1000-A20R50pH7-so_ovlp	1565	87397.6	0.735	3.4204	3.58206e-07	5.98269	21.9407	0.34584	87.6
O88338-all_66_MC1000-A20R50pH7-so_ovlp	1565	87397.6	0.735	3.40122	3.56198e-07	6.01643	22.4136	0.353117	88.02
O88338-all_67_MC1000-A20R50pH7-so_ovlp	1565	87397.6	0.735	3.41169	3.57294e-07	5.99798	22.2355	0.350159	87.38
O88338-all_68_MC1000-A20R50pH7-so_ovlp	1565	87397.6	0.735	3.41172	3.57298e-07	5.99791	22.1606	0.348523	87.36
O88338-all_69_MC1000-A20R50pH7-so_ovlp	1565	87397.6	0.735	3.40592	3.5669e-07	6.00812	22.036	0.347059	87.28
O88338-all_70_MC1000-A20R50pH7-so_ovlp	1565	87397.6	0.735	3.3894	3.54959e-07	6.03742	22.443	0.352927	87.35
O88338-all_71_MC1000-A20R50pH7-so_ovlp	1565	87397.6	0.735	3.37776	3.53741e-07	6.05822	22.776	0.358482	87.68
O88338-all_72_MC1000-A20R50pH7-so_ovlp	1565	87397.6	0.735	3.3615	3.52038e-07	6.08753	22.699	0.357143	87.68
O88338-all_73_MC1000-A20R50pH7-so_ovlp	1565	87397.6	0.735	3.38674	3.54681e-07	6.04216	22.3277	0.350986	87.2
O88338-all_74_MC1000-A20R50pH7-so_ovlp	1565	87397.6	0.735	3.36067	3.51951e-07	6.08903	22.4675	0.353398	87.45
O88338-all_75_MC1000-A20R50pH7-so_ovlp	1565	87397.6	0.735	3.3809	3.54069e-07	6.0526	22.4301	0.352494	87.15
O88338-all_76_MC1000-A20R50pH7-so_ovlp	1565	87397.6	0.735	3.3782	3.53787e-07	6.05742	22.5348	0.354125	87.23
O88338-all_77_MC1000-A20R50pH7-so_ovlp	1565	87397.6	0.735	3.39837	3.55899e-07	6.02147	22.0158	0.346929	87.24
O88338-all_78_MC1000-A20R50pH7-so_ovlp	1565	87397.6	0.735	3.40073	3.56147e-07	6.0173	21.9813	0.346113	86.85
O88338-all_79_MC1000-A20R50pH7-so_ovlp	1565	87397.6	0.735	3.41806	3.57962e-07	5.98678	21.7136	0.342084	86.38
O88338-all_80_MC1000-A20R50pH7-so_ovlp	1565	87397.6	0.735	3.42084	3.58252e-07	5.98193	21.7264	0.342465	86.26
O88338-all_81_MC1000-A20R50pH7-so_ovlp	1565	87397.6	0.735	3.42411	3.58595e-07	5.97622	21.6233	0.340213	85.79
O88338-all_82_MC1000-A20R50pH7-so_ovlp	1565	87397.6	0.735	3.41739	3.57891e-07	5.98797	21.6134	0.340557	85.71
O88338-all_83_MC1000-A20R50pH7-so_ovlp	1565	87397.6	0.735	3.42365	3.58547e-07	5.97701	21.3907	0.337215	85.38
O88338-all_84_MC1000-A20R50pH7-so_ovlp	1565	87397.6	0.735	3.43331	3.59559e-07	5.96019	21.3442	0.337196	85.56
O88338-all_85_MC1000-A20R50pH7-so_ovlp	1565	87397.6	0.735	3.41182	3.57308e-07	5.99774	21.4792	0.339052	85.59
O88338-all_86_MC1000-A20R50pH7-so_ovlp	1565	87397.6	0.735	3.40488	3.56581e-07	6.00997	21.4734	0.338586	85.96
O88338-all_87_MC1000-A20R50pH7-so_ovlp	1565	87397.6	0.735	3.40549	3.56645e-07	6.00889	21.6857	0.342219	86.12
O88338-all_88_MC1000-A20R50pH7-so_ovlp	1565	87397.6	0.735	3.42365	3.58546e-07	5.97702	21.5997	0.34055	85.61
O88338-all_89_MC1000-A20R50pH7-so_ovlp	1565	87397.6	0.735	3.38728	3.54737e-07	6.0412	21.8823	0.344994	85.68
O88338-all_90_MC1000-A20R50pH7-so_ovlp	1565	87397.6	0.735	3.40575	3.56672e-07	6.00843	21.7454	0.343473	85.71
O88338-all_91_MC1000-A20R50pH7-so_ovlp	1565	87397.6	0.735	3.41384	3.57519e-07	5.99419	21.6257	0.341049	85.4
O88338-all_92_MC1000-A20R50pH7-so_ovlp	1565	87397.6	0.735	3.42372	3.58554e-07	5.97689	21.3112	0.336312	85.13
O88338-all_93_MC1000-A20R50pH7-so_ovlp	1565	87397.6	0.735	3.43767	3.60015e-07	5.95264	21.4121	0.337665	85.23
O88338-all_94_MC1000-A20R50pH7-so_ovlp	1565	87397.6	0.735	3.42771	3.58972e-07	5.96994	21.1699	0.334462	85.36
O88338-all_95_MC1000-A20R50pH7-so_ovlp	1565	87397.6	0.735	3.44593	3.6088e-07	5.93837	21.0711	0.332675	85.3
O88338-all_96_MC1000-A20R50pH7-so_ovlp	1565	87397.6	0.735	3.43093	3.59309e-07	5.96434	21.3062	0.336705	85.88
O88338-all_97_MC1000-A20R50pH7-so_ovlp	1565	87397.6	0.735	3.43558	3.59796e-07	5.95626	21.2318	0.335074	85.63
O88338-all_98_MC1000-A20R50pH7-so_ovlp	1565	87397.6	0.735	3.43683	3.59927e-07	5.9541	21.4499	0.338674	85.71
O88338-all_99_MC1000-A20R50pH7-so_ovlp	1565	87397.6	0.735	3.44107	3.60371e-07	5.94676	21.4189	0.337734	85.76
O88338-all_100_MC1000-A20R50pH7-so_ovlp	1565	87397.6	0.735	3.45191	3.61507e-07	5.92808	21.0269	0.332392	85.57
Average	1565	87397.6	0.735	3.397	3.55756e-07	6.02447	22.3415	0.352471	87.98
SD	0	1.75503e-10	4.46326e-16	0.0330038	3.45636e-09	0.0586577	0.718419	0.0114164	1.545
